# Supplementary material for: Mapping multitissue regulatory variants reveals a liver-centric coexpression network associated with duck egg-laying performance
Source: HighWire-hosted journal article supplement (doi:10.1101/gr.280345.124), 2025-09-10
Supplement: Supplemental_Fig_S1.pdf [file Supplemental_Fig_S1.pdf]

A

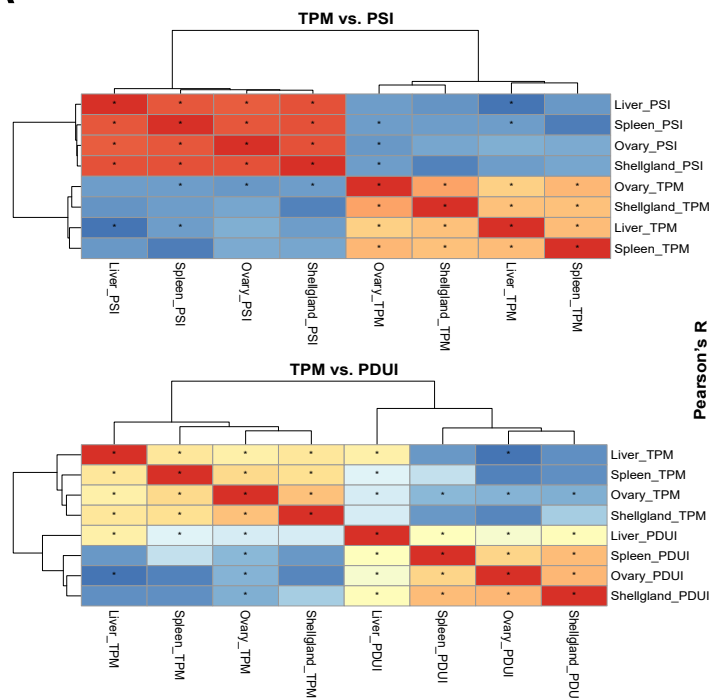

B

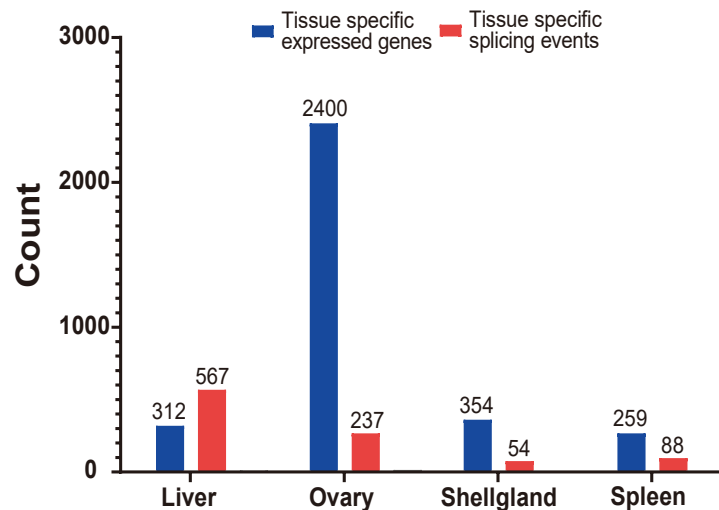

C

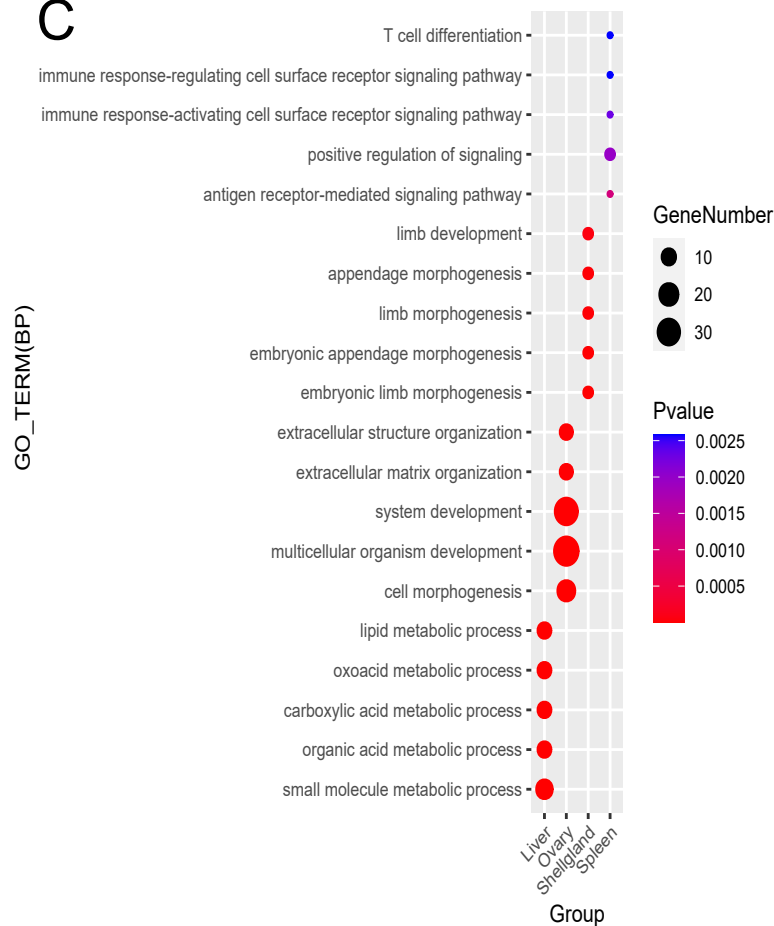

D

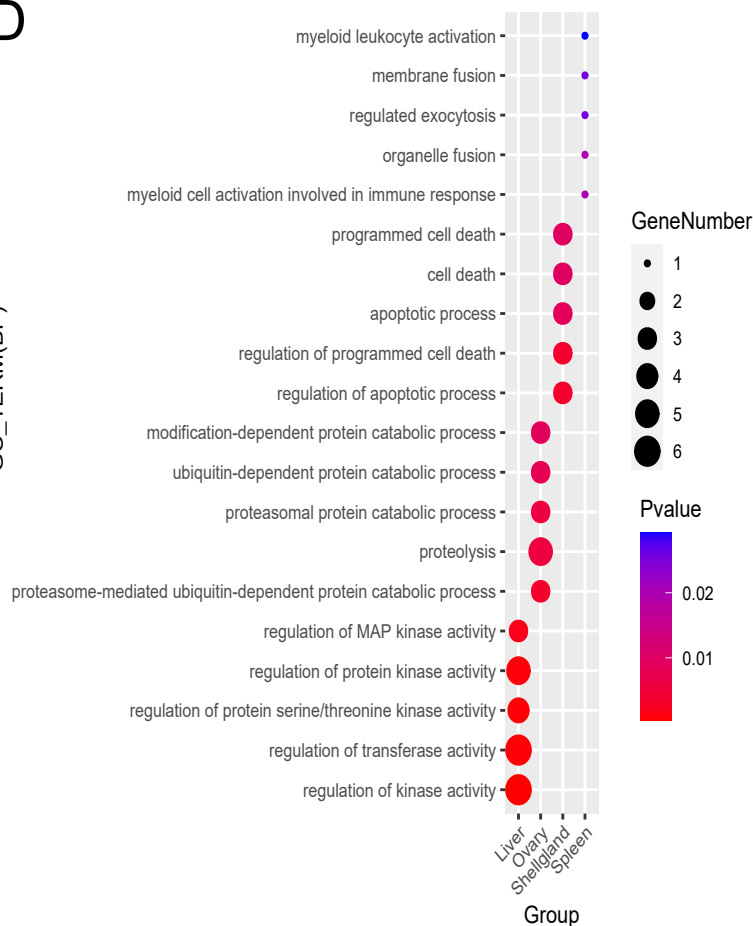

### Supplemental Fig S1. Tissue specific genes.

**A.** The correlation heatmap among molecular phenotype in different tissues. Each cell is labeled with the Pearson's correlation coefficients. And the asterisk (\*) indicates FDR of less than 0.05. **B.** The number of specific molecular phenotypes of different duck tissues. The horizontal and vertical axis respectively display the tissue types and the quantity of tissue-specific molecular phenotypes. **C & D.** The gene ontology enrichment of tissue specific genes (C) and tissue specific splicing related genes (D). We mainly presented the top 5 GO terms in each tissue.
