# Supplementary material for: Mapping multitissue regulatory variants reveals a liver-centric coexpression network associated with duck egg-laying performance
Source: HighWire-hosted journal article supplement (doi:10.1101/gr.280345.124), 2025-09-10
Supplement: Supplemental_Fig_S4.pdf [file Supplemental_Fig_S4.pdf]

## Liver

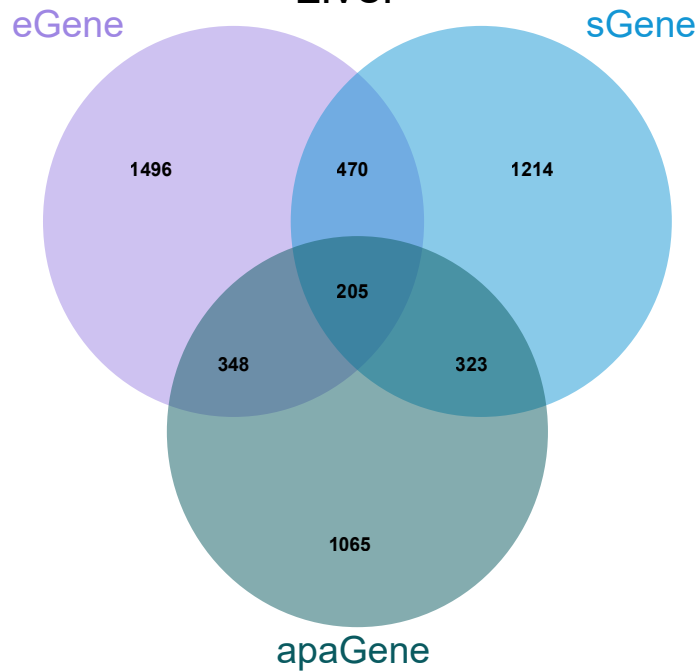

## Ovary

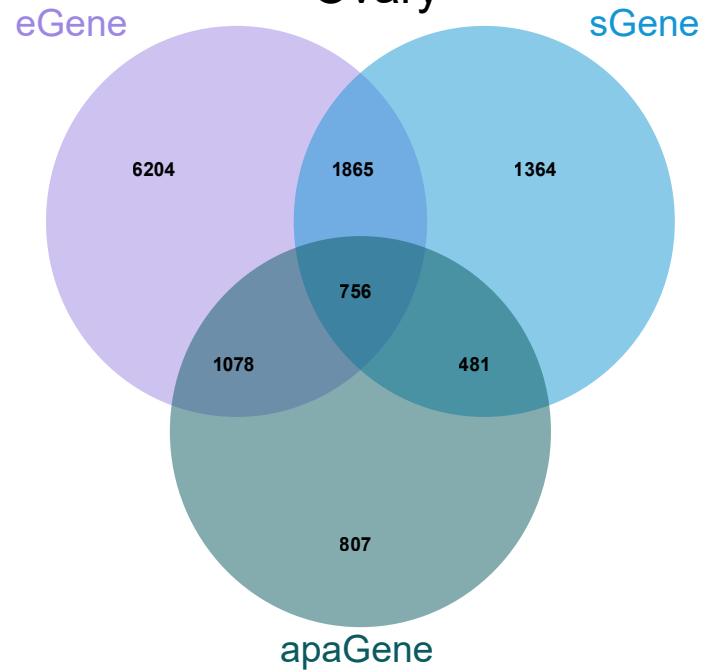

## Shell gland

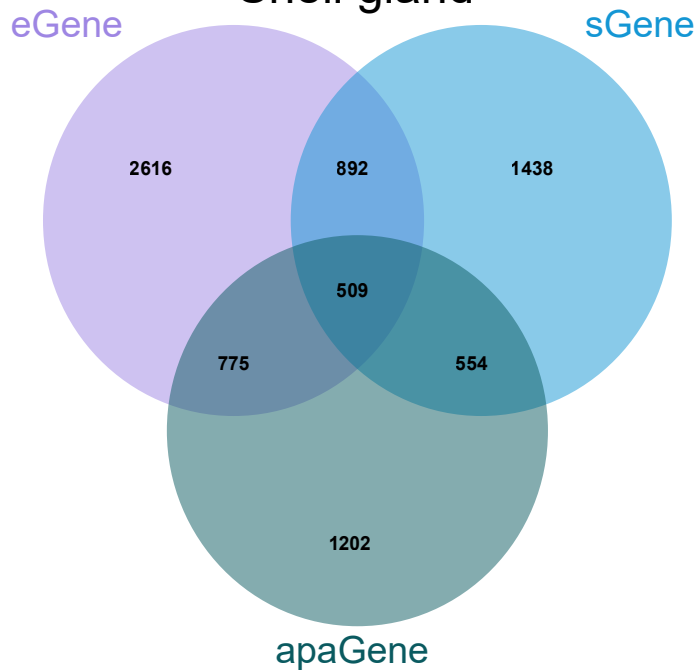

## Spleen

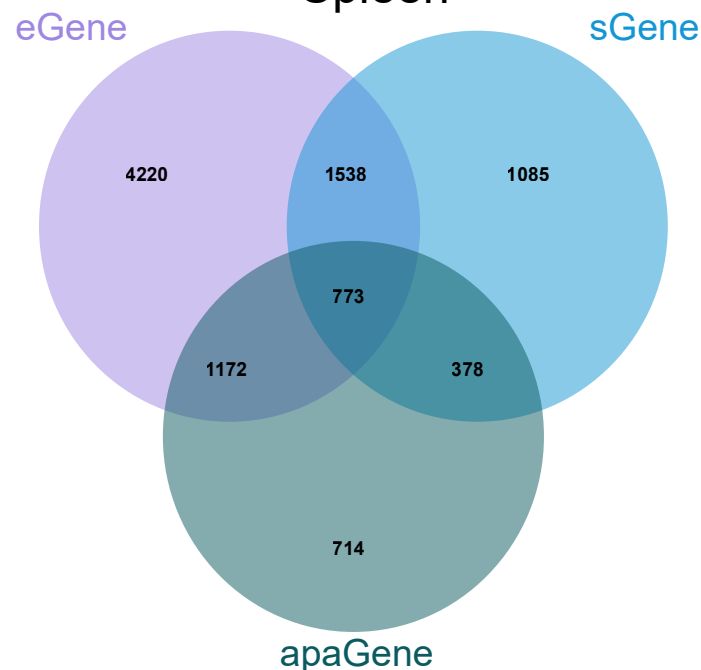

### Supplemental Fig S4. The overlap of molGenes in each tissue.

The venn diagrams of overlapped genes among eGenes, sGenes and apaGenes across different tissues.
