# Supplementary material for: Mapping multitissue regulatory variants reveals a liver-centric coexpression network associated with duck egg-laying performance
Source: HighWire-hosted journal article supplement (doi:10.1101/gr.280345.124), 2025-09-10
Supplement: Supplemental_Fig_S9.pdf [file Supplemental_Fig_S9.pdf]

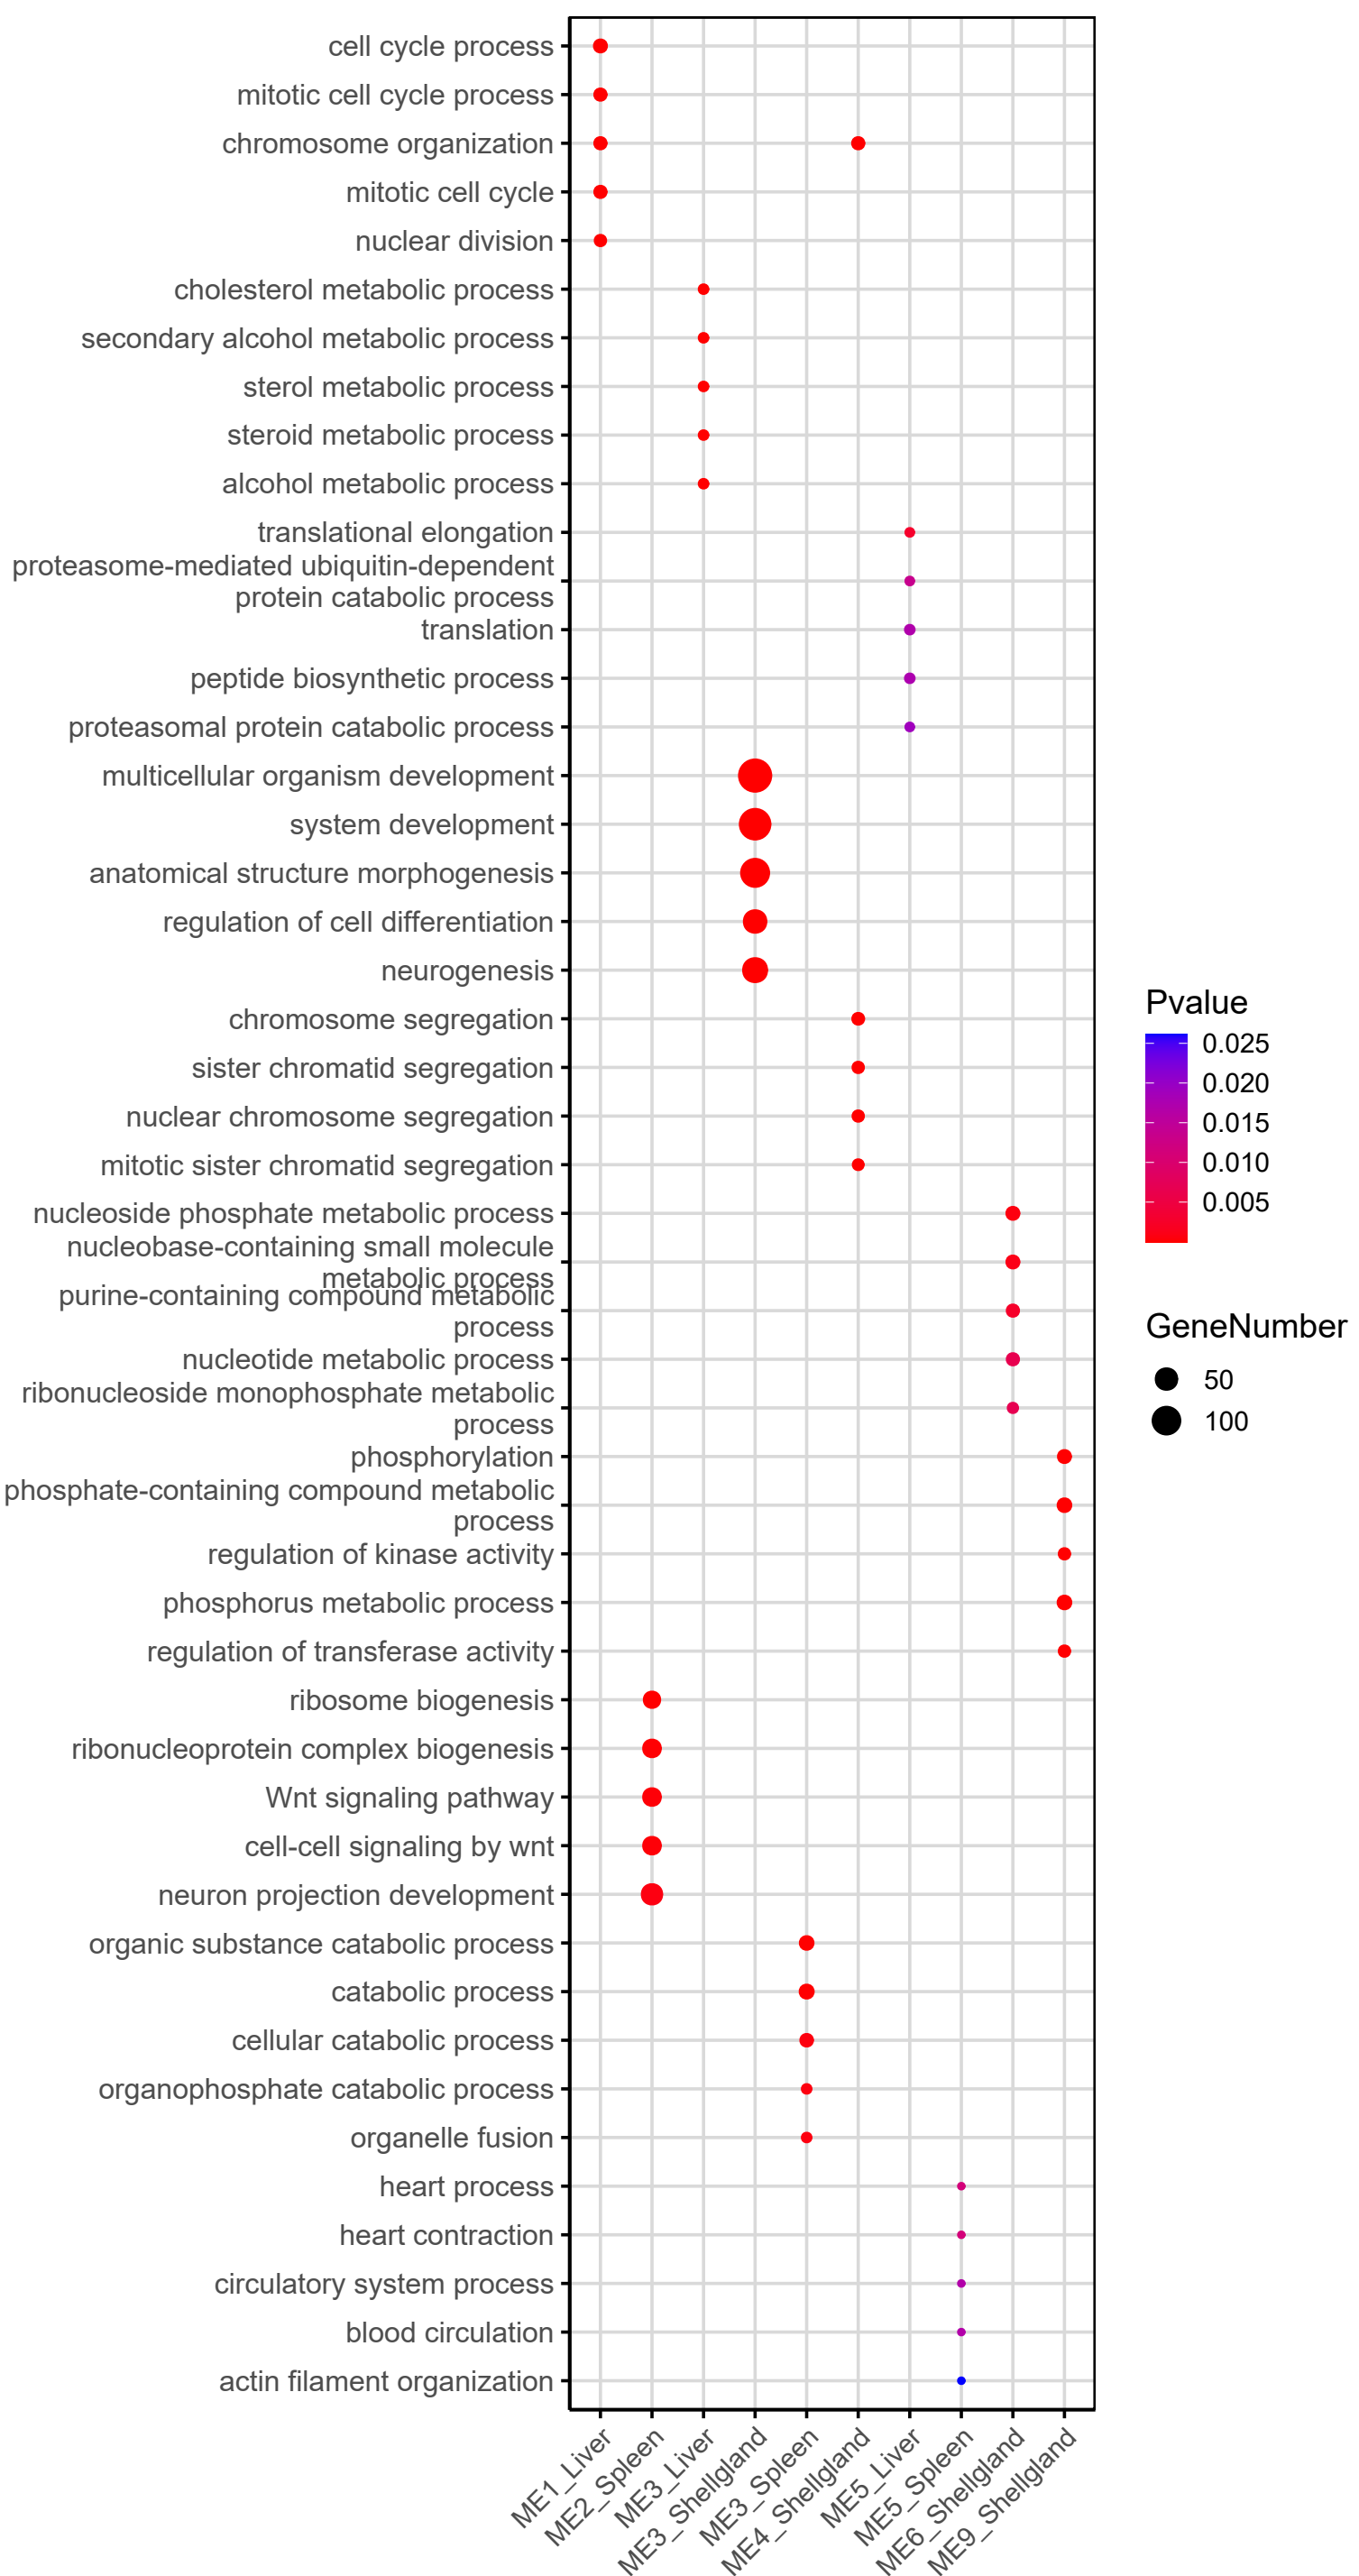

**Supplemental Fig S9. The GO enrichment results for genes in modules associated with duck total egg production.**
