# Supplementary material for: Mapping multitissue regulatory variants reveals a liver-centric coexpression network associated with duck egg-laying performance
Source: HighWire-hosted journal article supplement (doi:10.1101/gr.280345.124), 2025-09-10
Supplement: Supplemental_Table_S1.xlsx [file Supplemental_Table_S1.xlsx]

## Sheet: Sheet1
Supplemental Table S1. The meta-data.
Samples	WGS				RNA-seq																Traits
	Blood				Liver				Ovary				Spleen				Shellgland(Oviduct)				Eggshell color	Egg production number
	Clean_Reads	Clean_Bases	Q20(%)	Q30(%)	Clean_Reads	Clean_Bases	Q20(%)	Q30(%)	Clean_Reads	Clean_Bases	Q20(%)	Q30(%)	Clean_Reads	Clean_Bases	Q20(%)	Q30(%)	Clean_Reads	Clean_Bases	Q20(%)	Q30(%)	Reflectivity	Week1	Week2	Week3	Week4	Week5	Week6	Week7	Week8	Week9	Week10	Week11	Week12	Week13	Week14	Week15	Week16	Week17	Week18	Week19	Week20	Week21	Week22	Week23	Week24	Week25	Week26	Week27	Week28
C6017	17956568	5374967290	97.62	93.98	27870837	8289552642	97.55	93.61	45095556	6764333400	97.65	92.96	67038774	10055816100	98.61	95.6	54147364	8122104600	98.69	95.56	4.96193	0	0	2	6	1	4	4	6	7	7	7	0	5	6	6	6	5	7	6	6	7	4	7	7	6	4	7	7
C6018	21924505	6561793972	97.03	92.73	20677034	6180929068	97.99	94.27	37314248	5597137200	96.72	90.95	66664458	9999668700	98.72	95.81	55734028	8360104200	98.77	95.85	4.93389	0	0	1	3	5	5	10	5	6	5	7	7	7	7	7	7	7	7	7	7	7	7	7	7	7	5	7	7
C6021	19549964	5852404104	97.16	92.96	23519012	7020002942	98.29	95.08	52196492	7829473800	97.35	92.46	58273636	8741045400	98.54	95.4	50732098	7609814700	98.64	95.4	4.81421	0	0	1	5	4	7	7	4	2	1	3	6	6	6	6	7	6	7	6	4	6	6	6	6	4	4	6	6
C6022	22278066	6669372436	97.2	93.01	26748491	7990241592	98.04	94.28	47418736	7112810400	96.14	91.19	42141992	6321298800	98.43	95.09	57667682	8650152300	98.72	95.7	4.8413	1	4	7	4	4	5	9	6	7	7	7	7	6	7	6	7	7	7	7	7	7	7	7	7	7	4	6	7
C6321	20513988	6142638698	97.03	92.89	21402863	6397040236	97.58	93.24	41804500	6270675000	95.82	90.38	37622402	5643360300	98.58	95.19	48698984	7304847600	97.61	93.23	4.71699	0	0	0	6	7	7	7	7	7	7	7	7	7	7	7	7	7	6	6	7	7	7	7	6	6	7	7	7
C6322	18546630	5553375210	96.74	92.15	27447805	8197300314	98.24	94.74	52290770	7843615500	96.09	90.21	45857942	6878691300	98.63	95.36	/	/	/	/	5.09311	0	0	0	6	7	3	7	8	7	7	7	5	7	7	7	7	7	7	7	5	7	7	7	7	6	7	6	6
C6323	20023954	5994625700	97.07	92.81	24508863	7310784666	98.5	95.36	47468222	7120233300	95.89	90.49	46712614	7006892100	98.59	95.31	41930612	6289591800	98.79	95.96	4.96501	0	1	0	5	8	5	7	8	7	6	6	7	7	7	7	7	6	7	7	7	7	7	7	7	7	7	6	7
C6324	21999434	6584897038	97.07	92.86	20464068	6030421358	98.23	95.08	45535924	6830388600	97.57	92.94	50911754	7636763100	98.53	95.22	52585058	7887758700	98.54	95.43	5.0045	0	0	3	4	7	5	7	6	5	6	7	7	7	7	7	7	7	5	7	7	7	7	7	7	7	6	1	0
C6325	21147913	6329346964	97.02	92.68	36079782	10770351102	98.13	94.47	51649870	7747480500	95.93	89.73	53065442	7959816300	98.66	95.48	/	/	/	/	4.93546	0	0	0	1	6	6	5	6	7	8	7	7	7	7	7	7	7	7	6	7	7	7	7	7	6	7	7	7
C6326	18788669	5623247172	97.24	93.16	20386083	6046537174	98.41	95.39	41289690	6193453500	97.69	93.25	56117624	8417643600	98.59	95.65	49615696	7442354400	98.59	95.58	4.89077	0	0	5	6	8	6	3	8	7	6	7	7	4	7	7	7	7	7	7	6	7	6	7	7	6	7	7	7
C6327	19156890	5735244286	96.32	91.34	21462040	6406800904	98.25	94.8	38993624	5849043600	98.07	94.27	46392522	6958878300	98.61	95.28	63230538	9484580700	98.46	95.04	4.89401	0	5	4	6	8	8	6	7	7	7	7	7	5	7	4	3	7	5	7	6	6	7	7	7	7	7	7	7
C6328	18636030	5579982156	97.39	93.58	32674180	9738040704	98.33	94.96	71488880	10723332000	96.36	89.49	59772806	8965920900	98.69	95.63	/	/	/	/	4.89724	0	0	0	3	4	6	6	6	7	7	6	6	3	5	5	7	4	6	6	7	7	6	7	7	7	6	7	5
C6417	24532123	7343387146	97	92.67	20173114	6018020980	98.53	95.46	49350168	7402525200	97.23	92.07	40927836	6139175400	98.25	94.13	/	/	/	/	4.85798	0	0	2	4	7	5	7	7	6	7	5	7	7	7	7	7	5	6	7	7	4	4	6	7	6	6	6	6
C6418	17542752	5252049562	96.25	91.28	24203349	7220261114	98.27	94.94	49964528	7494679200	97.41	92.58	41428646	6214296900	98.5	95.28	53416566	8012484900	98.63	95.7	4.96193	0	0	0	3	4	7	6	5	7	7	7	7	7	7	7	7	7	7	7	7	6	7	7	7	7	7	7	0
C6419	20158834	6036424478	97.46	93.68	24205623	7227085522	98.61	95.66	50537952	7580692800	96.47	90.21	51053508	7658026200	98.66	95.55	40654502	6098175300	98.6	95.49	4.75845	0	0	0	0	3	6	7	7	7	7	7	7	7	7	6	6	7	6	7	7	6	6	7	7	7	7	7	7
C6420	20142710	6028263642	96.16	91.14	21765287	6494634266	98.22	94.67	50484136	7572620400	97.75	93.47	47731610	7159741500	98.76	95.89	51294510	7694176500	98.24	94.81	4.81421	0	0	5	4	5	7	6	7	7	7	7	7	7	7	7	7	7	6	7	7	6	7	7	7	7	7	6	7
C6421	19988741	5984132196	96.78	92.21	22620109	6758449788	97.87	94.1	49803596	7470539400	97.81	93.56	47744424	7161663600	98.65	95.54	52517820	7877673000	98.77	95.85	4.94173	0	0	0	3	6	6	6	5	6	5	5	7	4	4	7	6	6	7	7	6	7	7	6	6	7	6	6	2
C6422	16535797	4934983692	97.67	94.33	23538795	6904845800	98.41	95.37	52509886	7876482900	97.73	93.37	47918422	7187763300	98.7	95.91	46002526	6900378900	98.63	95.7	4.99398	0	2	7	4	7	7	7	7	7	7	7	7	7	7	7	7	7	7	7	7	6	7	6	7	6	7	7	7
C6423	17364973	5194174000	96.21	91.32	24242068	7240473790	98.42	95.15	44270418	6640562700	97.08	91.78	46976252	7046437800	98.71	95.78	50751892	7612783800	98.76	96.01	5.02385	0	3	7	3	4	8	7	6	6	7	7	6	7	7	7	7	7	4	6	7	7	7	6	7	6	7	7	7
C6424	17495193	5235726852	97.3	93.24	21839380	6515347064	98.53	95.48	36982532	5547379800	97.65	93.04	50405578	7560836700	98.63	95.4	49055374	7358306100	98.72	95.88	5.04876	0	0	4	7	4	5	7	6	7	7	7	7	7	7	7	7	7	7	6	7	7	6	7	2	0	0	0	0
C8001	25351598	7588502054	96.94	92.43	26164668	7803842996	98.3	94.88	72198574	10829786100	96.99	91.31	43963692	6594553800	98.69	95.62	/	/	/	/	4.96809	0	0	0	0	5	6	7	6	7	7	7	7	7	6	7	7	7	7	7	7	7	7	6	7	7	7	7	6
C8002	18558218	5551113360	96.24	91.29	21811775	6493704426	98.29	95.01	50594114	7589117100	97.58	92.97	50868184	7630227600	98.35	94.84	47867796	7180169400	98.57	95.5	4.85798	0	0	0	0	7	2	7	7	7	6	4	7	6	6	5	7	4	7	7	7	4	2	6	7	7	4	6	6
C8003	20331972	6087998976	96.9	92.45	28658288	8512707298	98.35	95.2	48130784	7219617600	97.39	92.49	45200356	6780053400	98.66	95.52	50463280	7569492000	98.62	95.65	5.05456	0	0	0	1	3	5	6	4	4	6	5	5	6	5	6	6	6	7	6	4	7	6	7	6	7	7	6	7
C8004	17083338	5113041348	97.59	94.2	25627896	7661801892	98.23	94.72	72188542	10828281300	96.8	90.83	57319334	8597900100	98.63	95.39	/	/	/	/	4.88264	0	0	0	1	0	6	6	7	7	7	7	7	6	7	7	7	7	5	6	6	6	8	7	7	7	7	7	5
C8005	22719532	6797121640	96.22	91.16	21264747	6340918596	97.62	93.29	36717310	5507596500	97.29	92.29	73051872	10957780800	98.57	95.42	54837106	8225565900	98.61	95.6	5.06034	0	0	1	0	4	3	7	7	7	6	7	7	7	7	7	7	7	7	7	7	7	6	7	6	6	7	7	7
C8006	18899375	5660062498	97.11	93.02	21782022	6508944558	98.24	94.88	47112474	7066871100	97.44	92.62	47826216	7173932400	98.65	95.53	56772830	8515924500	98.57	95.53	/	0	4	2	6	3	6	7	6	7	7	6	7	6	6	6	4	6	5	7	6	6	5	7	5	7	0	6	5
C8007	18685979	5594726164	97.22	92.97	21878915	6540232758	98.34	95.04	39194452	5879167800	96.07	90.83	50556676	7583501400	98.58	95.27	56780160	8517024000	98.85	96.15	4.65535	0	0	5	5	4	7	7	7	7	7	7	7	6	6	7	7	7	7	7	7	7	6	7	7	7	7	7	6
C8008	20884502	6249717964	96.96	92.64	25035537	7475544222	98.21	94.69	73559336	11033900400	96.61	90.31	59578954	8936843100	98.59	95.31	/	/	/	/	4.72064	0	0	2	7	7	7	5	3	7	6	4	7	6	4	6	6	4	6	6	6	1	3	3	3	6	4	6	3
C8011	18602070	5558974556	97.38	93.73	25096553	7491469700	98.17	94.58	67814194	10172129100	96.57	90.14	48108754	7216313100	98.65	95.5	/	/	/	/	5.006	0	0	0	0	3	4	5	6	7	7	7	7	7	7	7	7	7	7	7	7	7	5	7	5	7	7	7	7
C8012	22543871	6747917496	97.17	93.01	20689592	6179166494	98.32	95	36197494	5429624100	97.32	92.28	42959568	6443935200	98.58	95.64	50386008	7557901200	98.66	95.78	4.84298	0	0	1	5	7	7	7	6	7	7	7	7	7	7	7	7	7	7	7	7	7	6	7	7	7	7	7	7
C8013	17682020	5292574010	97.53	94.1	19210945	5734116936	97.27	92.47	36195346	5429301900	97.2	92.01	49833342	7475001300	98.69	95.62	/	/	/	/	4.83794	0	0	0	6	7	7	7	7	7	7	7	6	6	6	7	7	7	7	7	7	7	7	7	6	4	7	6	5
C8014	17749510	5315443204	97.12	92.84	23890912	7131455828	98.04	94.32	42490112	6373516800	95.45	89.25	73877326	11081598900	98.63	95.56	/	/	/	/	5.03122	5	5	3	5	4	7	6	7	7	5	6	7	7	7	6	7	7	7	7	7	7	7	6	7	6	6	5	4
C8015	16786765	5022330910	97.33	93.29	27263116	8137892460	98.37	95.26	39842428	5976364200	96.79	91.05	46002436	6900365400	98.4	94.96	48498408	7274761200	98.68	95.82	4.91648	0	0	5	5	6	7	6	7	7	7	7	7	7	7	7	7	7	7	7	7	7	7	5	7	7	7	7	7
C8016	21187969	6343407868	97.05	92.71	20187477	6030784952	98.23	94.72	39342064	5901309600	95.42	89.16	62526474	9378971100	98.69	95.77	/	/	/	/	4.73335	0	0	4	3	6	5	4	5	7	7	7	7	7	7	7	7	7	7	7	7	5	7	7	5	4	5	2	3
C8017	22491551	6734512586	96.96	92.52	24900902	7434045468	98.13	94.51	38876650	5831497500	95.6	89.67	53787326	8068098900	98.63	95.44	45436716	6815507400	98.79	95.95	5.08605	0	4	3	3	7	5	8	6	8	7	8	8	7	6	7	7	7	7	7	8	7	7	6	5	7	7	7	7
C8018	19451170	5823520456	97.19	93	22791205	6807532654	98.31	94.87	36957316	5543597400	95.42	89.08	/	/	/	/	42415752	6362362800	98.53	95.39	4.73877	0	0	4	3	4	5	5	3	5	3	5	6	6	2	4	6	6	7	5	4	5	6	3	5	4	5	6	1
C8019	21616811	6469112838	97.21	92.95	21704343	6464434736	98.39	95.29	41490186	6223527900	97.4	92.52	46404266	6960639900	98.48	95.3	49179618	7376942700	98.63	95.73	4.77259	0	0	7	5	7	7	7	5	7	7	7	7	7	7	7	7	7	7	7	7	7	7	7	7	7	7	7	7
C8020	19013324	5684089948	96.53	91.85	/	/	/	/	/	/	/	/	/	/	/	/	/	/	/	/	/	/	/	/	/	/	/	/	/	/	/	/	/	/	/	/	/	/	/	/	/	/	/	/	/	/	/	/	/
C8021	20901017	6257547742	97.07	92.87	21063126	6297840868	97.42	92.85	44802074	6720311100	95.85	90.23	44196178	6629426700	98.61	95.73	44845328	6726799200	98.76	95.85	4.80735	0	0	1	7	7	5	8	7	8	6	7	8	7	8	6	7	9	7	7	7	7	8	8	7	7	7	7	7
C8022	21264567	6367427554	96.82	92.33	23597938	7055983876	97.5	92.98	43599662	6539949300	95.82	90.14	48332504	7249875600	98.58	95.59	54563126	8184468900	98.76	95.79	4.69674	7	4	5	7	4	5	7	6	7	7	7	7	7	7	7	7	7	7	7	7	7	7	7	7	7	7	7	6
C8023	18563083	5556670010	97.7	94.38	19672501	5873480258	98.44	95.23	46209508	6931426200	97.83	93.58	51984526	7797678900	98.63	95.43	53019964	7952994600	98.66	95.76	4.79355	0	0	5	7	6	5	7	6	7	7	7	7	7	7	7	7	7	7	7	7	7	7	6	7	7	6	7	5
C8024	17154179	5122851280	97.42	93.79	21087723	6290831028	97.73	94.06	51793782	7769067300	97.55	92.92	50735912	7610386800	98.53	95.34	51983934	7797590100	98.49	95.16	4.88427	0	0	4	5	6	5	6	5	6	6	7	7	7	6	7	7	7	7	7	6	6	2	5	5	2	3	1	0
C8025	21223937	6354468768	97.23	93.05	19119119	5706859406	98.23	94.76	72042460	10806369000	96.32	89.36	48208692	7231303800	98.61	95.34	/	/	/	/	4.89724	0	3	7	7	7	5	6	7	6	7	7	7	7	5	1	7	7	7	7	7	7	7	7	7	7	7	7	7
C8026	18906246	5656052478	96.99	92.63	21226335	6341616662	98.13	94.65	44754834	6713225100	98.13	94.43	48639588	7295938200	98.53	95.05	47302364	7095354600	98.55	95.42	4.94017	0	1	5	6	7	6	6	6	7	7	7	7	7	7	6	7	7	7	7	4	3	3	2	5	0	2	2	0
C8027	21703396	6498889888	97.19	93	24197242	7212241936	98.44	95.43	36993326	5548998900	97.46	92.65	39949368	5992405200	98.41	94.97	56561924	8484288600	98.8	95.97	4.69859	2	0	5	7	6	7	7	7	7	7	7	7	6	7	7	6	7	7	7	7	7	7	7	7	7	7	7	7
C8028	21669768	6476404204	97.58	94.16	24692838	7369154740	98.17	94.6	39645028	5946754200	95.76	90.07	40410102	6061515300	98.38	94.95	60155568	9023335200	98.77	95.87	4.8125	0	0	0	5	5	5	8	7	7	7	7	7	7	7	7	7	7	7	7	7	7	7	7	7	7	7	7	7
C8029	17430432	5219771512	97.03	92.67	21913922	6532091116	98.38	95.35	51574490	7736173500	96.58	90.43	45951960	6892794000	98.48	95.21	58429586	8764437900	98.58	95.57	4.96963	0	0	1	0	1	6	7	7	7	6	7	7	6	6	5	5	3	6	7	7	4	6	5	6	6	6	5	3
C8030	18969150	5682175324	97.15	92.83	19220770	5734212678	98.4	95.08	41058512	6158776800	96.04	90.76	43852666	6577899900	98.64	95.45	/	/	/	/	4.74595	0	0	1	5	4	6	6	6	7	7	7	7	7	7	7	7	7	7	7	7	7	7	6	7	6	7	6	7
C8031	20131759	6015418084	96.44	91.75	24706482	7367904284	98.19	94.78	39589992	5938498800	97.5	92.72	68622938	10293440700	98.56	95.35	51957516	7793627400	98.77	95.85	4.95884	0	0	1	2	6	7	8	5	7	7	5	6	7	7	7	7	7	7	7	7	7	7	7	7	6	7	7	7
C8032	19991761	5984844590	96.98	92.64	23640853	7051684636	98.52	95.45	37588922	5638338300	97.61	93.06	57682486	8652372900	98.64	95.45	/	/	/	/	/	0	0	0	0	0	0	0	1	3	6	7	7	7	7	7	7	7	7	7	7	7	7	7	7	7	7	7	4
C8033	21961682	6571252872	96.16	91.2	20287930	6053721180	98.22	94.76	/	/	/	/	52359572	7853935800	98.62	95.48	49385250	7407787500	98.54	95.42	4.77083	0	0	0	0	0	1	7	7	6	6	6	7	7	7	7	7	7	7	7	7	7	7	6	6	4	7	7	5
C8034	21568035	6452570738	97.22	93.12	25469847	7557164112	97.72	94.18	38978634	5846795100	97.64	93.16	46789316	7018397400	98.38	94.83	50981452	7647217800	98.49	95.31	4.67431	0	0	0	2	3	2	6	4	3	7	5	3	6	7	7	5	7	5	5	5	5	2	3	3	1	2	2	0
C8035	20059409	6000288764	97.32	93.52	20642786	6123397668	98.03	94.66	45679764	6851964600	97.42	92.6	44713540	6707031000	98.45	95.13	51224940	7683741000	98.55	95.49	4.82443	5	3	3	5	6	7	7	7	7	7	7	5	7	7	7	6	7	7	7	7	7	5	7	6	7	5	7	0
C8036	20569329	6159002966	97.15	92.9	22148710	6614331338	98.14	94.74	60360530	9054079500	96.76	91.37	71371522	10705728300	98.61	95.58	50697494	7604624100	98.61	95.65	4.83289	0	0	3	7	3	1	6	7	7	5	6	6	6	6	5	4	6	4	2	0	0	0	0	0	0	0	0	3
C8037	19520896	5845846466	97.27	93.3	20584461	6139426768	97.64	93.3	41299898	6194984700	97.52	92.75	55954110	8393116500	98.64	95.48	52344824	7851723600	98.83	96.1	4.8646	0	0	2	5	5	6	6	6	8	6	7	7	7	6	7	7	7	7	7	7	7	7	4	7	7	7	7	7
C8038	23721783	7101538528	97.15	92.96	21755735	6493692436	98.04	94.41	40529374	6079406100	97.39	92.43	42814918	6422237700	98.64	95.45	54626322	8193948300	98.56	95.51	4.87611	1	6	5	4	6	7	6	6	7	7	7	7	7	7	7	7	7	7	7	7	7	7	7	7	7	7	7	6
C8039	16609518	4973689078	97.04	92.91	27512707	8212917670	98.17	94.76	36081988	5412298200	95.98	90.8	53810528	8071579200	98.7	95.71	/	/	/	/	4.92283	0	1	6	6	7	6	4	5	6	7	5	6	6	7	7	6	7	7	7	7	7	7	7	7	7	7	7	6
C8040	26654015	7980776436	96.91	92.47	20180035	6027972512	98.33	95.15	56357764	8453664600	97.48	92.61	43452856	6517928400	98.76	95.9	/	/	/	/	4.853	0	1	2	5	5	7	6	7	7	7	7	7	7	7	7	7	7	7	7	7	7	7	7	7	7	7	7	7
C8041	16526293	4948029300	96.9	92.47	25280787	7523703876	98.38	95.23	40937148	6140572200	97.91	93.8	46431588	6964738200	98.57	95.28	/	/	/	/	4.74953	0	0	5	5	7	7	7	5	7	7	7	7	7	7	7	7	7	7	7	7	7	7	7	7	7	7	7	7
C8042	18469903	5529530370	97.85	94.44	24887012	7421058228	98.28	94.85	36852478	5527871700	95.79	90.01	62077692	9311653800	98.63	95.43	/	/	/	/	/	0	0	3	5	7	5	7	7	7	7	7	7	7	7	6	7	6	7	7	7	7	7	7	7	5	7	7	6
C8043	19799733	5928049982	97.18	93.02	19397810	5785629472	98.35	95.06	57075024	8561253600	95.89	89.45	54715380	8207307000	98.59	95.26	52863828	7929574200	98.63	95.75	5.10154	0	5	1	3	3	3	7	7	7	7	7	7	7	5	7	7	5	6	7	5	3	0	0	0	2	0	0	0
C8044	17536461	5249506588	97.09	92.77	22419108	6692837736	98.12	94.55	47199452	7079917800	97.79	93.48	39608578	5941286700	98.54	95.09	51677252	7751587800	98.55	95.46	4.67807	0	0	4	7	6	8	7	6	7	6	7	7	7	7	7	7	7	7	7	7	7	7	7	7	7	6	7	5
C8046	19349891	5793481178	97.15	93.19	20684680	6173359688	97.38	92.76	50328236	7549235400	97.41	92.55	76656018	11498402700	98.66	95.71	/	/	/	/	4.85133	0	0	6	6	5	4	7	6	7	5	6	7	6	7	7	5	7	7	7	7	7	6	7	6	7	7	6	7
C8047	21886571	6555119260	97.57	93.89	21791218	6493729714	98.28	94.99	50787790	7618168500	97.46	92.64	44075058	6611258700	98.46	95.14	54633992	8195098800	98.68	95.82	4.9386	0	3	7	7	6	6	7	7	7	7	7	5	8	7	7	6	7	7	7	7	7	7	7	7	7	7	7	7
C8048	20104914	6016920222	96.38	91.64	24803561	7404309924	98.27	94.96	52619302	7892895300	96.31	90.87	50288912	7543336800	98.69	95.62	/	/	/	/	5.00899	0	0	4	5	4	5	7	6	7	7	6	1	6	3	2	7	6	6	7	7	6	2	5	7	7	7	6	7
C8049	18237882	5460538724	96.51	91.89	21697092	6480394876	98.21	94.74	44201096	6630164400	97.68	93.22	45716180	6857427000	98.72	95.71	60217060	9032559000	98.58	95.48	4.82273	0	5	4	7	6	6	7	5	7	7	6	7	5	6	5	7	4	6	6	7	6	6	5	6	5	6	4	2
C8050	18217530	5454869688	96.68	92.08	22595855	6744721070	98.08	94.41	56075420	8411313000	95.96	89.68	49091762	7363764300	98.7	95.62	44999660	6749949000	98.62	95.66	5.00899	1	6	6	7	7	6	7	7	8	7	7	5	3	7	7	7	7	8	7	7	7	7	7	6	7	7	7	7
C8051	19853008	5937427282	96.46	91.64	21443095	6396569592	98.21	94.75	36656440	5498466000	97.33	92.31	46537962	6980694300	98.55	95.2	48634566	7295184900	98.69	95.62	4.90368	0	0	0	0	5	6	6	7	7	7	7	7	6	7	7	7	7	7	7	7	7	7	6	6	7	5	6	5
C8052	18963517	5671433698	97.59	94.15	25815222	7706098150	98.23	94.83	41284642	6192696300	97.9	93.85	38182888	5727433200	98.55	95.53	48630252	7294537800	98.65	95.79	5.07895	0	0	7	7	7	7	6	6	7	7	7	7	6	7	7	7	7	7	7	7	6	7	6	5	4	6	7	4
C8053	16371644	4902955782	97.39	93.43	27968753	8336681918	98.31	95.16	38678140	5801721000	97.73	93.32	50628276	7594241400	98.67	95.58	45214804	6782220600	98.56	95.42	5	0	0	0	7	6	6	7	7	7	7	7	7	7	7	7	7	7	7	7	7	7	7	7	7	7	7	7	6
C8054	21728137	6507062606	96.79	92.25	28304867	8442187368	98.29	95.02	36399116	5459867400	97.75	93.43	46683804	7002570600	98.57	95.22	56859584	8528937600	98.6	95.62	4.92283	0	0	4	5	6	6	7	7	7	7	7	7	7	7	7	7	7	7	7	7	7	7	5	7	6	7	5	6
C8055	17130565	5123605460	96.33	91.72	20364827	6081630646	98.08	94.49	39206610	5880991500	97.63	93.06	43579058	6536858700	98.5	94.98	53783122	8067468300	97.35	92.46	5.03709	0	2	2	5	1	5	7	7	6	7	7	7	7	7	7	7	7	7	7	7	7	7	7	7	6	7	7	5
C8056	26961717	8067270922	97.02	92.75	23959499	7154071894	97.6	93.25	42906646	6435996900	97.58	92.92	41769754	6265463100	98.73	95.78	51267216	7690082400	98.6	95.64	4.72247	0	0	3	6	3	7	5	5	4	6	7	5	5	7	6	6	7	7	7	7	7	7	7	6	6	6	7	6
C8057	22221815	6652310578	96.96	92.54	/	/	/	/	/	/	/	/	/	/	/	/	/	/	/	/	/	/	/	/	/	/	/	/	/	/	/	/	/	/	/	/	/	/	/	/	/	/	/	/	/	/	/	/	/
C8059	18176476	5441144922	96.97	92.68	25423072	7574336120	97.23	92.99	52317642	7847646300	97.78	93.51	64378530	9656779500	98.58	95.43	49304768	7395715200	98.65	95.77	4.34341	0	0	0	0	5	7	7	4	4	7	7	6	6	7	4	3	0	0	1	0	0	0	0	0	0	0	5	0
C8060	20953519	6272466834	97.11	92.83	20690890	6183266930	98.4	95.13	47165400	7074810000	97.71	93.29	52309424	7846413600	98.6	95.36	48611476	7291721400	98.61	95.68	4.72429	0	0	0	0	5	7	6	7	6	5	5	7	7	5	8	5	7	7	7	7	5	5	6	6	6	7	7	6
C8061	16638569	4980589426	95.67	90.34	19690774	5869380858	97.26	93.08	47719926	7157988900	97.38	92.49	72758622	10913793300	98.56	95.42	48893986	7334097900	98.56	95.48	5	0	0	0	0	6	7	5	7	7	7	7	6	3	6	7	6	7	5	5	7	7	7	7	5	7	5	7	6
C8062	18970277	5678790736	97.28	93.45	23111217	6886913616	98.34	95.22	39032174	5854826100	97.68	93.08	62526960	9379044000	98.63	95.58	59884688	8982703200	98.78	95.92	/	0	0	0	0	0	6	6	6	7	7	7	7	6	7	7	7	7	7	7	7	7	7	7	7	6	7	7	7
C8063	20565161	6157201082	97.01	92.65	24645472	7356895696	98.1	94.45	47950680	7192602000	97.71	93.37	53129050	7969357500	98.58	95.28	52973262	7945989300	98.77	96.1	/	0	0	0	4	3	6	7	5	2	2	8	6	7	5	0	0	0	0	0	0	0	0	0	0	0	0	1	4
C8064	18501402	5537596290	97.31	93.26	25498186	7616083542	98.1	94.36	46208338	6931250700	97.74	93.38	50834004	7625100600	98.74	95.83	47732848	7159927200	98.45	95.12	/	0	0	0	0	0	0	3	3	5	5	4	4	3	5	7	7	7	7	7	7	6	7	7	7	6	7	7	4
C8065	18667503	5582400286	97.14	93.47	22922933	6844089858	98.06	94.41	47687042	7153056300	97.82	93.52	59754250	8963137500	98.66	95.53	54336222	8150433300	98.55	95.45	4.75132	0	0	0	1	1	0	5	6	7	7	7	7	7	6	7	7	7	7	7	7	7	7	7	7	7	7	7	7
C8067	18328397	5485884412	97.48	93.49	20044751	5974375862	98.5	95.34	42280362	6342054300	96.01	90.76	59885702	8982855300	98.47	95.16	52482196	7872329400	98.64	95.69	4.79874	0	0	0	4	5	7	6	5	7	7	7	6	7	7	7	7	7	7	7	7	7	7	7	7	7	7	7	7
C8068	19144962	5730516706	96.99	92.62	25588575	7632409622	98.38	95.27	43962418	6594362700	97.78	93.47	64598874	9689831100	98.68	95.71	58892080	8833812000	98.65	95.73	4.83794	0	0	0	0	0	4	7	4	3	7	7	7	6	5	6	7	7	7	4	6	7	7	7	3	7	7	7	7
C8069	20031002	5993530420	97.22	93.41	/	/	/	/	/	/	/	/	/	/	/	/	/	/	/	/	/	/	/	/	/	/	/	/	/	/	/	/	/	/	/	/	/	/	/	/	/	/	/	/	/	/	/	/	/
C8072	19276019	5769711658	96.95	92.58	25514635	7619348274	98.11	94.51	50850918	7627637700	97.31	92.17	48085132	7212769800	98.4	94.61	55714900	8357235000	98.79	95.94	4.96501	0	0	0	0	5	7	6	7	7	7	7	7	6	7	6	6	7	7	7	5	7	4	7	7	7	7	7	7
C8073	18102736	5418115832	97.02	92.73	22691126	6779285158	98.44	95.26	46711450	7006717500	97.89	93.8	51417642	7712646300	98.78	95.89	54335308	8150296200	98.71	95.92	4.75132	0	0	0	0	1	3	7	6	5	3	6	4	6	4	7	6	4	4	5	6	6	7	6	6	7	7	7	5
C8074	30272756	9063346250	96.97	92.6	21843440	6525099214	98.32	95.01	48034724	7205208600	97.71	93.3	48208170	7231225500	98.63	95.42	42464058	6369608700	98.76	96.12	4.82273	0	0	0	4	5	4	3	7	7	7	6	7	7	6	7	7	6	7	7	7	7	7	7	7	7	7	7	7
C8075	20972021	6278069602	97.01	92.62	19314004	5766369048	98.46	95.27	48780972	7317145800	97.89	93.85	51724026	7758603900	98.75	95.78	52144252	7821637800	98.7	95.82	4.7866	0	0	7	2	6	7	7	7	7	7	7	7	7	7	7	7	4	6	7	6	7	7	7	7	1	1	1	7
C8077	17087470	5115576028	97.39	93.89	23462614	7008189456	97.48	92.92	48129928	7219489200	97.64	93.14	47336902	7100535300	98.59	95.25	40771904	6115785600	97.58	92.98	5.07895	0	1	4	3	4	7	7	7	6	7	7	7	7	7	7	7	7	7	7	7	7	7	7	7	7	7	7	7
C8078	28807427	8624059244	96.94	92.5	/	/	/	/	/	/	/	/	/	/	/	/	/	/	/	/	/	/	/	/	/	/	/	/	/	/	/	/	/	/	/	/	/	/	/	/	/	/	/	/	/	/	/	/	/
C8079	16768587	5021816518	97.11	92.93	21584835	6451309952	97.93	94.26	40190420	6028563000	96.59	90.65	80346590	12051988500	98.67	95.75	58963696	8844554400	98.65	95.75	4.853	0	3	7	3	2	1	5	5	7	6	7	7	7	7	6	7	6	6	6	5	3	5	1	4	1	0	0	0
C8080	20031213	5997060268	97.18	92.93	27405660	8170427872	98.41	95.42	38297714	5744657100	95.52	89.37	48376620	7256493000	98.16	94.43	49872218	7480832700	98.55	95.44	/	0	0	0	0	5	5	6	7	7	7	7	4	7	7	7	4	7	7	7	2	0	0	0	0	0	7	6	7
C8081	17714891	5292603158	96.72	92.27	25142753	7514031552	98.07	94.39	42666696	6400004400	95.77	90.14	69494898	10424234700	98.56	95.45	/	/	/	/	4.98641	0	1	0	3	3	7	6	7	7	7	7	7	7	6	7	7	7	7	7	7	7	7	7	7	7	7	7	6
C8082	21143758	6329366722	96.99	92.59	26140212	7806604124	98.08	94.41	52961514	7944227100	96.45	91.22	52338768	7850815200	98.61	95.42	/	/	/	/	4.67243	0	0	0	6	7	7	6	8	7	6	7	7	7	6	6	6	5	7	7	7	6	7	7	7	7	7	7	7
C8083	18452975	5525181936	96.56	91.87	26689373	7928192672	98.21	94.79	51513388	7727008200	97.76	93.28	42527739	6379160850	98.64	95.4	44639792	6695968800	98.44	95.01	5.05456	0	0	0	0	0	2	3	4	6	7	7	7	6	7	7	7	7	6	7	7	7	7	6	7	7	7	7	7
C8084	16644070	4981335244	97.02	92.71	24702490	7385583908	98.19	94.66	46997414	7049612100	95.93	90.4	42823660	6423549000	98.44	95.04	47214170	7082125500	98.72	95.75	4.63807	0	0	0	0	0	4	6	7	5	7	7	4	5	4	5	5	1	4	7	4	5	5	0	0	0	0	0	0
C8085	21113314	6321305702	96.97	92.59	26232230	7810564886	98.37	95.27	51875406	7781310900	97.74	93.23	46050112	6907516800	98.49	95.33	55722408	8358361200	98.54	95.3	/	1	0	0	0	0	1	0	0	0	0	1	1	1	0	1	1	0	0	0	0	0	1	0	1	0	0	0	0
C8086	18711355	5593321636	96.1	91.02	21661209	6479313708	97.62	93.3	36499910	5474986500	98.11	94.34	56063970	8409595500	98.62	95.42	/	/	/	/	4.94798	0	0	0	0	3	7	7	7	7	7	7	7	7	7	7	7	7	7	7	7	7	6	7	7	7	5	6	6
C8087	16469499	4931087532	97.25	93.57	19572538	5825146414	98.42	95.4	49161964	7374294600	97.74	93.24	40658566	6098784900	98.33	94.83	54773208	8215981200	98.57	95.47	5.01495	0	0	3	4	5	7	6	6	5	4	7	7	6	7	7	7	7	7	7	7	7	7	7	7	7	4	5	6
C8088	19473247	5833149468	97.24	92.95	27762761	8262701818	98.39	95.27	48430144	7264521600	97.49	92.76	46504332	6975649800	98.68	95.82	51463616	7719542400	98.6	95.48	4.87283	0	0	0	5	6	6	6	7	7	7	8	7	7	7	7	7	7	7	5	7	7	7	7	7	7	7	6	7
C8089	19838996	5933776518	96.37	91.67	23051405	6879630066	98.22	94.77	40242958	6036443700	97.77	93.38	49221422	7383213300	98.55	95.17	56289538	8443430700	98.54	95.3	5.04585	0	0	0	1	7	4	6	8	4	5	4	6	6	6	7	6	5	6	7	7	7	6	7	7	6	7	7	7
C8091	19091342	5717472564	97.04	92.68	25302395	7560926546	98.15	94.55	42396960	6359544000	95.93	90.45	57588816	8638322400	98.52	95.23	57861114	8679167100	98.77	95.89	/	0	0	2	7	3	6	6	6	7	7	6	7	7	5	7	6	4	0	0	0	3	6	5	6	4	5	7	3
C8092	17237109	5154277098	96.08	91.17	25420165	7593648224	98.1	94.45	63240540	9486081000	96.51	89.87	51574162	7736124300	98.56	95.16	/	/	/	/	/	0	0	3	5	6	6	6	7	7	7	5	7	7	6	3	0	0	0	0	5	6	6	7	5	5	6	7	7
C8093	20389521	6099993782	96.58	92.01	25260293	7546849472	98.16	94.6	37588078	5638211700	95.73	89.88	49367936	7405190400	98.59	95.63	50144004	7521600600	98.78	95.9	4.89885	2	6	4	4	3	6	7	6	6	6	5	5	6	6	6	5	4	6	5	5	5	6	5	5	4	6	5	5
C8094	17828915	5337701888	97.27	93.35	24398969	7298521768	97.07	91.88	48897776	7334666400	96.26	91.44	50956240	7643436000	98.55	95.14	49038292	7355743800	98.83	96.08	4.91329	0	0	0	0	0	3	5	7	6	7	7	6	7	7	6	6	7	7	7	7	7	6	6	7	7	7	7	6
C8095	24678554	7384859468	97.21	93.06	20923335	6247361734	98.57	95.56	43027302	6454095300	97.95	93.9	43496270	6524440500	98.65	95.55	54702928	8205439200	98.81	95.98	4.98641	0	0	5	2	2	5	4	7	5	7	7	5	6	6	5	6	7	7	7	4	6	5	6	7	6	6	6	4
C8096	20151611	6033551620	96.82	92.21	24729135	7371059308	98.18	94.61	46708380	7006257000	95.82	90.04	43479184	6521877600	98.68	95.6	54064542	8109681300	98.78	95.89	4.67054	0	0	0	0	5	7	7	7	7	7	7	7	7	7	7	7	7	7	7	7	7	7	7	5	7	7	7	7
C8097	16585673	4966076068	97.27	93.37	21822212	6508599348	98.08	94.49	39111050	5866657500	97.42	92.58	54365672	8154850800	98.68	95.63	52543242	7881486300	98.67	95.78	4.7261	0	0	7	3	6	7	6	7	6	7	7	7	7	7	7	7	7	7	6	7	7	7	6	5	7	6	6	6
C8098	21601788	6465149062	96.87	92.37	19736512	5876442808	98.45	95.25	44683502	6702525300	95.99	90.69	57676628	8651494200	98.6	95.52	45191534	6778730100	98.62	95.61	4.99699	0	0	1	4	5	7	7	6	7	5	8	7	7	7	7	7	7	7	7	7	6	7	7	7	7	6	6	6
C8099	16889745	5058632748	97.15	93.07	21430774	6379517432	98.42	95.32	40949554	6142433100	96.93	91.39	48652448	7297867200	98.41	95.02	48803204	7320480600	98.63	95.68	5.01644	0	0	4	6	7	6	5	7	7	7	7	7	7	7	7	7	7	7	7	5	7	7	7	7	7	6	7	6
C8100	17832207	5334295702	96.81	92.39	24767606	7390825890	98.29	94.89	47568140	7135221000	97.81	93.54	64575108	9686266200	98.65	95.73	53751824	8062773600	98.62	95.63	5.04439	0	0	1	3	4	4	7	7	6	6	7	7	7	7	7	7	7	6	7	7	7	7	6	0	0	0	0	6
C8101	16905976	5051240580	95.59	90.19	23636540	7053275560	98.11	94.7	51480008	7722001200	97.13	91.71	66947834	10042175100	98.58	95.44	51339242	7700886300	98.47	95.13	5.04585	0	1	6	5	3	7	5	5	7	5	4	7	6	7	7	6	7	7	6	7	5	6	6	4	2	1	0	0
C8102	16382572	4901623750	95.38	89.83	24741767	7377028690	98.03	94.21	42151066	6322659900	97.63	93.1	47537942	7130691300	98.59	95.44	51277964	7691694600	98.63	95.67	4.74595	0	0	0	0	6	4	6	6	8	7	7	7	7	7	6	7	7	7	7	7	7	7	7	7	7	7	6	7
C8103	19836573	5939416824	97.36	93.65	21776504	6514136624	97.6	93.27	45174526	6776178900	96.14	91.07	61066640	9159996000	98.59	95.52	51165090	7674763500	98.63	95.66	4.77259	0	0	0	3	3	5	6	6	7	6	7	7	7	7	7	7	6	7	7	7	7	7	7	7	6	6	7	7
C8104	18741487	5612409170	97.5	93.61	19825404	5923165712	98.49	95.35	38337908	5750686200	95.42	89.03	40432460	6064869000	98.6	95.4	56513096	8476964400	98.81	96.02	4.90689	0	0	0	0	0	2	6	2	3	7	7	7	7	7	7	7	6	7	4	0	0	0	0	0	0	6	7	5
C8105	17269067	5163057976	97.46	93.87	22140572	6613060964	98.1	94.54	50927280	7639092000	96.3	89.81	45993832	6899074800	98.58	95.63	51978166	7796724900	98.62	95.69	4.95264	0	0	1	1	4	7	6	6	6	6	7	6	7	7	7	6	6	6	7	6	7	7	7	7	7	6	7	7
C8106	18324468	5477971832	96.55	91.97	22807669	6804026292	97.93	94	37404074	5610611100	97.55	92.82	47908448	7186267200	98.65	95.71	47016152	7052422800	98.62	95.61	5.02827	0	0	1	0	0	1	5	6	6	6	7	5	7	4	7	7	6	6	6	7	7	7	5	7	7	7	7	7
C8107	22447244	6718588856	97.01	92.65	20515739	6128077438	98.03	94.38	45175582	6776337300	97.83	93.62	44397802	6659670300	98.59	95.31	49920820	7488123000	98.49	95.14	4.8125	0	0	0	3	5	6	3	4	4	5	7	7	6	4	7	6	6	6	5	7	5	6	6	7	6	6	3	6
C8108	26936826	8057842810	97.19	92.99	19586926	5852111148	98.29	94.97	39509142	5926371300	95.61	89.59	/	/	/	/	58760358	8814053700	98.78	95.88	4.82103	0	0	0	2	3	6	7	6	7	7	7	7	7	7	6	6	7	7	7	7	7	7	6	7	7	7	6	5
C8109	23889653	7152361218	97.11	92.81	19672482	5877731784	98.25	94.74	43482634	6522395100	95.78	90.18	51020378	7653056700	98.53	95.03	58872258	8830838700	98.71	95.71	4.71516	0	0	2	0	5	6	6	7	7	5	5	7	6	4	7	7	6	7	7	7	7	6	7	7	7	6	7	6
C8110	20478256	6130097008	96.95	92.45	24110570	7198665608	98.37	95.06	45726288	6858943200	97.8	93.52	50540110	7581016500	98.64	95.45	61169712	9175456800	98.77	95.87	5.08463	4	0	2	0	2	5	1	4	5	3	6	7	7	7	7	7	7	7	7	6	7	7	7	7	7	7	7	6
C8111	20248959	6064115182	97.37	93.49	22715765	6776204540	98.39	95.3	53595916	8039387400	95.69	89.09	45056846	6758526900	98.61	95.4	/	/	/	/	4.85632	0	0	5	6	6	6	7	7	7	7	7	7	7	7	7	7	6	7	7	7	7	7	7	7	7	7	6	7
C8112	17022073	5088513400	96.73	92.39	24513963	7312000488	98.28	94.89	47456254	7118438100	97.83	93.6	44033054	6604958100	98.49	95.16	57349760	8602464000	98.72	95.69	4.77961	1	7	2	7	4	6	7	7	7	7	7	7	7	7	7	7	7	7	6	7	7	7	7	7	6	7	7	7
C8122	18374664	5502337418	97.4	93.68	26466107	7883787746	98.17	94.78	52425562	7863834300	96.33	90.94	51844216	7776632400	98.65	95.55	/	/	/	/	/	0	1	0	3	8	7	6	7	7	7	7	7	5	6	5	6	7	6	7	5	7	7	7	7	6	7	7	7
C8123	20665277	6179994838	96.23	91.31	20281682	6044953016	98.54	95.48	47921128	7188169200	97.6	93.02	70183722	10527558300	98.68	95.77	57621748	8643262200	98.62	95.59	4.94642	0	0	3	3	6	7	7	5	7	7	6	7	7	7	7	7	7	7	7	7	6	7	7	7	7	7	6	7
C8124	17818819	5332756964	96.46	91.73	23262820	6953037164	98.19	94.69	48312444	7246866600	97.69	93.22	49720426	7458063900	98.49	94.91	44603468	6690520200	98.79	95.98	/	0	0	0	7	4	6	7	8	7	5	7	6	7	3	2	0	0	0	0	0	0	0	5	7	7	7	7	7
C8127	21074999	6306668980	96	90.77	20006721	5970880992	98.2	94.8	52266162	7839924300	95.75	89.3	48074222	7211133300	98.62	95.42	/	/	/	/	4.90849	0	1	3	7	6	7	5	5	7	7	6	5	5	7	7	7	7	7	7	7	7	7	6	7	7	7	7	6
C8128	23405384	7008428090	97.3	93.69	21126650	6302252230	98.01	94.55	42140220	6321033000	98.03	94.11	49388520	7408278000	98.62	95.36	/	/	/	/	4.94642	0	0	0	0	2	5	7	7	7	7	7	7	7	6	7	7	7	7	7	7	7	7	7	7	7	7	7	7
C8129	21842534	6538260320	97.17	92.9	22490776	6711725388	98.2	94.81	38876282	5831442300	97.7	93.21	50418960	7562844000	98.66	95.54	/	/	/	/	4.87611	0	0	0	4	4	3	5	6	6	7	7	6	6	6	7	7	7	7	7	7	7	7	7	7	7	7	7	7
C8130	21258180	6356513748	97.07	92.93	27834478	8312888484	98.27	94.81	75515672	11327350800	96.71	90.57	52237902	7835685300	98.64	95.47	/	/	/	/	/	0	0	0	0	1	2	1	1	1	0	0	0	0	0	0	0	1	1	0	0	0	0	0	0	0	0	0	0
C8131	21484095	6432413436	97.09	92.78	21494043	6420203040	98.27	94.93	37201576	5580236400	95.92	90.54	56009958	8401493700	98.56	95.14	/	/	/	/	/	0	1	4	6	3	3	4	2	4	4	5	5	5	6	5	4	7	5	5	5	5	4	4	7	5	7	6	5
C8132	18188003	5443866528	97.64	94.3	21600409	6441078444	98.18	94.87	51170880	7675632000	96.46	91.33	48381636	7257245400	98.5	95.1	/	/	/	/	/	0	1	6	6	3	7	6	7	7	7	7	7	7	7	6	6	7	7	7	2	2	6	6	7	7	7	7	7
C8133	18142696	5426749166	95.93	90.82	22963627	6850700342	98.3	95.06	51107996	7666199400	97.62	93	46073762	6911064300	98.62	95.37	/	/	/	/	4.83626	0	0	7	7	3	4	6	6	6	7	7	7	7	7	6	7	7	7	7	7	7	7	7	7	7	7	7	7
C8134	19577650	5855641588	96.5	91.68	19519383	5839339620	97.25	92.43	44230778	6634616700	96.07	90.91	61563560	9234534000	98.57	95.33	48572358	7285853700	98.75	95.78	/	0	0	3	1	1	1	3	2	1	1	0	0	0	1	0	0	0	0	0	0	0	0	0	0	0	0	0	0
C8135	19418162	5812846372	96.9	92.4	22051658	6573681030	98.35	95.22	42147876	6322181400	98.04	94.15	49501754	7425263100	98.56	95.15	/	/	/	/	4.96039	0	0	5	7	8	3	6	6	5	6	7	7	7	7	7	7	7	7	7	6	5	7	7	7	7	6	7	7
C8136	19306308	5775977884	97.22	93.39	20768787	6195723282	98.16	94.58	36867884	5530182600	96.88	91.3	72743328	10911499200	98.64	95.63	/	/	/	/	4.8125	0	0	0	1	5	5	6	6	7	7	7	7	7	7	7	7	7	7	7	8	7	7	7	7	7	7	7	7
C8137	18863633	5643035736	96.78	92.25	23105565	6895060742	98.09	94.54	52516448	7877467200	97.34	92.24	44818734	6722810100	98.5	95	55231450	8284717500	98.55	95.44	4.78834	0	1	3	1	3	3	7	6	7	7	7	7	6	6	7	4	6	4	6	7	7	7	7	7	7	7	7	7
C8138	20706861	6198654616	97.18	93.03	19589028	5856457178	97.44	92.89	49665136	7449770400	97.78	93.49	45327708	6799156200	98.46	94.91	51419168	7712875200	98.75	96.04	4.77435	0	0	1	0	5	3	7	7	7	7	6	3	4	6	5	4	6	7	5	3	1	4	6	7	6	7	2	4
C8139	24306170	7276116820	97.31	93.28	22287075	6661669408	98.34	94.98	51049666	7657449900	97.24	92.14	47696028	7154404200	98.66	95.51	/	/	/	/	4.87283	0	0	0	2	3	5	6	7	7	7	6	7	6	7	6	5	7	7	7	7	6	7	6	6	6	7	5	7
C8140	17803805	5329078936	96.32	91.38	26875102	8009738236	98.3	95.15	50945590	7641838500	97.57	93.01	66755040	10013256000	98.55	95.29	49730064	7459509600	98.61	95.28	4.92125	0	0	4	2	4	5	7	7	7	7	7	6	7	7	7	6	5	7	7	7	7	7	7	7	7	7	7	6
C8141	19750345	5913210268	97.36	93.33	26532697	7926506570	98.27	94.81	46705002	7005750300	97.42	92.56	50514190	7577128500	98.79	96.02	47268720	7090308000	98.74	96	/	0	0	0	0	0	0	0	0	0	0	0	0	0	0	0	0	0	0	0	0	0	0	0	0	0	0	0	0
C8142	27885251	8341383386	97.07	92.86	26132341	7801105212	98.23	94.78	53364242	8004636300	97.71	93.36	40288710	6043306500	98.34	94.78	/	/	/	/	/	0	1	0	0	0	0	1	4	0	0	0	0	0	0	0	0	0	0	0	0	0	0	0	0	0	0	0	0
C8143	23223572	6952376906	97.02	92.73	20635245	6160455516	97.98	94.25	56400018	8460002700	96.52	91.05	48404640	7260696000	98.57	95.26	54088276	8113241400	98.71	95.67	4.93231	0	5	6	2	6	7	7	7	8	6	7	5	7	7	7	6	7	7	7	7	5	5	7	7	5	7	7	7
C8144	17229095	5159749622	97.4	93.62	21598254	6446984318	98.24	94.74	47522132	7128319800	97.41	92.54	48966550	7344982500	98.69	95.63	/	/	/	/	4.75311	0	0	0	0	2	6	6	7	7	7	7	7	8	7	4	7	6	7	5	6	5	7	5	6	7	6	6	6
C8145	17518501	5243718248	96.08	91.04	22032943	6573054436	97.81	93.71	40270832	6040624800	97.99	94.07	44566026	6684903900	98.29	94.24	46534650	6980197500	98.57	95.52	4.97269	0	0	0	5	6	5	7	7	7	7	7	7	7	6	7	7	6	7	6	4	5	6	7	6	7	7	6	6
C8146	19563432	5858556842	97.36	93.53	21581596	6453875252	96.93	91.75	55195242	8279286300	97.37	92.46	51093964	7664094600	98.78	95.94	46465822	6969873300	98.65	95.81	5.14432	0	1	5	7	4	6	7	7	7	8	7	6	6	7	7	7	7	7	7	7	7	7	7	7	7	7	7	7
C8147	22992962	6881523916	97.22	93.05	20637361	6154796026	98.22	94.8	45397488	6809623200	97.64	93.1	51224952	7683742800	98.63	95.44	57271666	8590749900	98.58	95.48	4.74595	0	0	7	6	7	7	7	7	7	6	8	7	6	7	5	6	6	7	7	7	6	5	3	3	5	5	7	6
C8148	18079483	5414127532	96.91	92.33	21696844	6468487030	98.37	95.06	51043600	7656540000	97.56	92.9	47366804	7105020600	98.75	95.9	49415758	7412363700	98.64	95.73	4.80564	0	0	0	1	7	7	7	7	7	7	7	7	6	7	7	7	5	7	7	6	7	7	7	2	6	4	7	6
C8149	21729579	6505107826	97.14	93.01	24959061	7432199132	98.29	94.99	46295412	6944311800	97.45	92.66	40746000	6111900000	98.51	95.32	54668392	8200258800	98.73	95.98	4.85798	0	0	0	3	6	7	4	7	4	7	7	7	7	7	7	7	6	7	6	6	7	7	6	7	7	7	7	7
C8150	18709235	5601366548	96.44	91.54	25397639	7572365646	98.12	94.45	51570684	7735602600	96.8	90.9	70437930	10565689500	98.62	95.63	51157802	7673670300	98.64	95.73	5.006	0	5	7	6	7	6	7	7	7	7	7	6	7	7	7	7	7	5	7	6	7	6	7	6	6	7	6	6
C8151	19003666	5689344226	96.85	92.43	23157456	6918791000	98.38	95.08	38031392	5704708800	95.82	90.23	/	/	/	/	54755874	8213381100	98.52	95.31	5.03122	0	0	3	2	6	4	7	4	6	5	4	5	6	6	7	6	7	6	5	6	6	7	7	5	7	7	6	5
C8152	19620237	5874124962	96.8	92.18	21111533	6293545702	98.5	95.41	43329596	6499439400	97.51	92.83	42068746	6310311900	98.62	95.4	53795978	8069396700	98.48	95.18	4.82443	0	1	2	3	6	7	7	5	7	7	7	7	7	5	6	7	7	7	7	7	7	7	7	7	7	7	7	7
C8169	20425743	6116000030	97.15	92.98	/	/	/	/	/	/	/	/	/	/	/	/	/	/	/	/	/	/	/	/	/	/	/	/	/	/	/	/	/	/	/	/	/	/	/	/	/	/	/	/	/	/	/	/	/
C8170	19001352	5678970748	97.36	93.67	21790978	6500131048	98.32	95	46964672	7044700800	97.6	93.02	60738358	9110753700	98.64	95.45	57223344	8583501600	98.61	95.64	4.91807	0	0	0	0	0	0	4	2	3	6	6	5	8	7	7	7	6	7	7	7	6	5	3	5	1	0	0	0
C8171	17694631	5297671976	97.11	92.84	21887928	6533979418	98.05	94.46	45213780	6782067000	97.64	93.02	49813710	7472056500	98.6	95.33	62988666	9448299900	98.52	95.37	5.01644	0	0	0	0	0	0	3	6	7	7	7	7	5	6	7	6	7	7	6	7	7	7	6	6	7	7	6	7
C8172	19109223	5722031826	97.31	93.38	23134178	6901646528	98.23	94.77	46228868	6934330200	97.92	93.77	59850008	8977501200	98.66	95.53	40521830	6078274500	98.49	95.31	5.05456	0	0	0	5	6	5	7	7	6	5	6	7	8	7	7	7	7	7	7	6	7	7	7	7	7	7	6	6
C8173	17997662	5389269502	96.95	92.6	23417822	6969699768	97.4	93.29	50722362	7608354300	95.82	89.6	53520594	8028089100	98.72	95.72	52591170	7888675500	98.63	95.66	5.03122	0	0	0	0	4	7	5	7	7	7	6	7	7	7	7	7	7	7	7	7	7	7	5	7	7	7	7	5
C8174	17717263	5306611314	97.28	93.08	/	/	/	/	/	/	/	/	/	/	/	/	/	/	/	/	/	/	/	/	/	/	/	/	/	/	/	/	/	/	/	/	/	/	/	/	/	/	/	/	/	/	/	/	/
C8175	18153843	5436014654	97.18	92.9	20723138	6192592684	97.48	92.88	42006464	6300969600	97.48	92.68	54018906	8102835900	98.59	95.26	50712220	7606833000	98.74	95.75	4.85798	0	1	3	4	5	4	7	6	6	7	6	7	7	7	6	7	8	8	7	7	7	7	4	7	7	7	7	6
C8176	19325078	5780095750	96.22	91.19	22862317	6826471718	98.31	95.1	51300248	7695037200	95.73	89.25	38153608	5723041200	98.56	95.2	53374114	8006117100	98.56	95.51	4.82443	0	0	0	6	7	6	8	7	8	7	9	8	7	7	5	7	8	7	7	6	7	7	7	6	7	7	7	7
C8233	18270905	5472184278	97.18	93.02	22508411	6708706376	98.45	95.3	48598494	7289774100	97.84	93.59	55599148	8339872200	98.58	95.26	43344592	6501688800	98.48	95.27	4.72247	0	0	0	3	6	6	5	6	4	7	6	5	7	5	7	7	7	7	7	7	6	7	6	7	6	6	7	6
C8234	21068565	6297725952	96.12	91.08	20598157	6148243528	98.55	95.45	42794156	6419123400	97.94	93.84	57838876	8675831400	98.67	95.56	53568780	8035317000	98.65	95.71	4.79874	0	0	0	0	0	0	1	5	7	7	6	6	7	7	7	6	7	7	7	7	7	7	7	7	7	7	7	7
C8235	19178768	5732381424	97.43	93.82	30240853	8992583642	98.51	95.64	52250814	7837622100	95.96	89.82	44453702	6668055300	98.6	95.33	54231252	8134687800	98.48	95.21	4.91807	0	0	2	7	7	7	7	7	7	7	7	7	7	7	7	7	7	6	6	7	7	7	7	7	7	7	6	7
C8236	19470585	5825848328	96.78	92.31	29240200	8688449122	97.44	93.32	52522512	7878376800	96.17	90.36	49305322	7395798300	98.67	95.56	60155726	9023358900	98.66	95.83	4.86129	0	0	1	6	7	5	6	6	5	7	6	7	7	7	6	7	6	7	7	7	5	7	7	6	6	6	6	5
C8237	17748899	5313676086	97.05	92.79	21116108	6303415666	98.57	95.57	46407620	6961143000	97.71	93.18	63719384	9557907600	98.6	95.32	59372592	8905888800	98.5	95.33	4.96809	0	0	2	6	7	7	7	8	7	7	7	7	7	7	7	4	2	6	6	7	4	3	2	3	3	1	0	5
C8238	17281445	5165251748	96.48	91.8	/	/	/	/	/	/	/	/	/	/	/	/	/	/	/	/	/	/	/	/	/	/	/	/	/	/	/	/	/	/	/	/	/	/	/	/	/	/	/	/	/	/	/	/	/
C8239	18097189	5413674552	96.02	90.9	22815389	6811240898	98.19	94.89	53186194	7977929100	95.83	89.27	53743136	8061470400	98.74	95.8	51827848	7774177200	98.61	95.68	/	0	0	0	0	6	5	5	6	6	3	3	5	6	6	7	7	6	7	7	7	7	7	7	7	7	7	7	5
C8240	17513684	5244240510	96.73	92.15	21371885	6382378434	97.65	93.4	45189694	6778454100	97.55	92.88	51091778	7663766700	98.69	95.63	51016800	7652520000	98.72	95.7	4.89077	0	0	1	0	0	0	0	0	3	7	7	6	7	7	7	7	7	7	7	7	7	7	7	7	7	7	7	7
C8241	22779323	6821496508	96.85	92.45	24652417	7359907320	98.36	95.22	40254908	6038236200	97.58	92.96	63672648	9550897200	98.47	95.13	46440658	6966098700	98.49	95.29	/	0	0	0	0	0	0	0	2	1	0	0	0	1	0	0	0	0	0	0	0	0	0	2	0	0	0	0	0
C8242	18827069	5632133210	97.33	93.64	25454457	7593079202	98.19	94.84	37747308	5662096200	97.36	92.37	66034672	9905200800	98.58	95.5	49700914	7455137100	98.4	94.98	4.97116	0	0	1	1	4	5	6	8	5	7	7	7	7	7	7	7	7	7	7	7	7	7	7	7	7	7	7	7
C8243	28562972	8544136765	97.37	93.62	21806742	6515515662	97.38	93.23	53281416	7992212400	95.96	89.74	42288714	6343307100	98.65	95.49	51850506	7777575900	98.65	95.81	4.86954	0	5	7	7	8	6	7	8	7	6	6	7	7	6	7	7	2	5	5	5	3	4	3	5	4	4	3	6
C8244	20351008	6091865038	97.22	93.07	25894398	7734612864	98.22	94.74	46687456	7003118400	97.76	93.44	53724334	8058650100	98.68	95.6	59608290	8941243500	98.56	95.5	4.70044	0	1	3	1	6	6	6	5	7	7	7	7	5	7	6	6	6	6	6	6	7	7	7	7	7	7	7	7
C8245	22653283	6781960734	96.89	92.57	20231057	6041572124	98.63	95.73	48600334	7290050100	97.9	93.71	57533638	8630045700	98.51	94.97	63839230	9575884500	98.66	95.74	5.04876	0	3	4	2	4	2	3	3	3	2	4	3	5	3	7	4	4	4	5	6	5	5	6	7	7	6	4	7
C8246	17769787	5315622210	97.2	93	20671754	6178946894	97.33	92.61	38223452	5733517800	98	94.04	49209548	7381432200	98.51	94.98	/	/	/	/	4.62838	0	0	0	6	4	5	6	7	7	6	6	7	7	6	7	6	7	7	7	7	4	7	7	7	7	7	6	6
C8247	17400723	5205724266	96.36	91.56	26114466	7774189606	98.22	94.96	50041628	7506244200	96.92	91.22	55160584	8274087600	98.54	95.06	46311198	6946679700	98.33	94.72	4.93074	0	0	0	5	4	6	5	3	7	5	7	6	6	6	6	7	7	6	7	5	6	7	7	7	7	7	7	7
C8248	23774289	7111946352	97.41	93.88	25726780	7685744464	98.11	94.49	43344438	6501665700	97.64	93.13	48434128	7265119200	98.25	94.67	47954046	7193106900	98.6	95.27	5.03709	0	0	0	2	6	6	7	7	6	6	7	7	7	7	7	7	7	7	7	6	7	6	6	7	6	6	7	6
C8249	16942941	5072932490	96.71	92.15	27944503	8313452512	97.39	93.24	52194460	7829169000	95.7	89.18	45196292	6779443800	98.6	95.32	44507870	6676180500	98.58	95.52	5.06034	0	0	0	5	6	5	7	6	7	7	7	7	7	7	7	7	7	7	7	7	7	7	7	7	7	7	7	7
C8250	16386838	4899902226	96.33	91.46	24998686	7450849984	97.28	92.98	36740054	5511008100	97.63	93.07	45651858	6847778700	98.62	95.34	58575798	8786369700	98.61	95.61	4.91966	0	0	0	3	8	7	6	5	6	7	7	7	7	7	7	7	7	7	7	7	6	7	6	6	6	7	6	7
C8252	21899063	6542898102	96.64	91.98	29595256	8813357374	97.43	93.33	51537938	7730690700	96.04	90.18	50194798	7529219700	98.7	95.66	47453056	7117958400	98.56	95.55	4.926	0	0	0	0	1	7	6	6	6	6	7	6	7	7	7	6	6	7	7	7	7	7	6	7	6	6	5	7
C8253	19219083	5748287836	97.12	93.14	25365489	7563637814	98.35	95.24	54029326	8104398900	96.33	90.77	43356632	6503494800	98.52	94.96	59954088	8993113200	98.64	95.73	4.96963	0	0	0	4	7	7	8	7	6	6	7	6	7	7	7	6	7	7	7	7	7	7	7	7	7	7	7	6
C8254	20012725	5987369502	97.32	93.63	25708089	7664695200	98.32	95.22	53097020	7964553000	95.92	89.69	47268904	7090335600	98.65	95.5	61894976	9284246400	98.59	95.69	/	0	0	0	0	0	4	5	6	6	7	7	4	5	7	4	7	4	1	0	0	0	0	0	0	0	0	0	2
C8255	21389062	6404273796	96.85	92.34	30795824	9186284120	98.35	95.19	40875886	6131382900	97.59	93.08	62303244	9345486600	98.67	95.89	43592964	6538944600	98.7	95.67	/	0	0	0	0	0	0	0	0	3	7	7	7	6	7	7	7	7	7	7	7	7	7	7	7	7	5	5	4
C8256	19731703	5901288462	97.26	93.45	27028426	8043472714	98.11	94.68	39847552	5977132800	97.57	92.91	64062916	9609437400	98.52	95	39916564	5987484600	98.56	95.55	5.08888	0	0	2	0	4	6	5	3	6	4	9	6	5	7	7	6	7	7	6	7	7	7	7	7	7	7	7	7
C8289	22548399	6746534278	97.38	93.61	19511892	5831041174	98.17	94.61	39902622	5985393300	96	90.53	43372600	6505890000	98.74	95.75	53275904	7991385600	98.54	95.46	/	0	0	1	5	5	5	6	6	8	6	8	7	7	8	6	7	6	7	7	6	7	7	7	6	0	0	1	6
C8290	20055631	5998821524	97.34	93.59	22772635	6798700702	98.48	95.33	43647824	6547173600	97.74	93.28	54136006	8120400900	98.68	95.54	50697640	7604646000	98.54	95.34	/	/	/	/	/	/	/	/	/	/	/	/	/	/	/	/	/	/	/	/	/	/	/	/	/	/	/	/	/
C8293	16603600	4963884444	97.52	93.91	22302302	6650691658	98.33	95.22	37987978	5698196700	97.68	93.17	73198152	10979722800	98.53	95.3	58939236	8840885400	98.53	95.37	4.70966	0	0	3	1	7	7	7	7	7	7	7	7	7	7	6	6	7	7	6	6	7	6	3	6	5	6	6	6
C8294	20558797	6144009504	97.44	93.81	59451182	17720816586	98.27	94.81	72968878	10945331700	96.48	89.87	49283028	7392454200	98.74	95.77	49516706	7427505900	98.58	95.55	4.67807	0	3	6	7	6	7	7	7	6	6	8	9	6	5	7	7	6	6	6	7	5	2	4	6	4	1	4	5
C8296	16924477	5062460502	97.19	93.34	26226305	7802060838	97.62	93.73	53224554	7983683100	96.01	89.77	45353538	6803030700	98.75	95.84	49826728	7474009200	98.41	95.05	/	0	0	0	0	0	2	6	3	7	5	3	3	3	5	2	0	2	4	1	2	1	3	4	6	3	5	7	4
C8825	16993392	5088806864	97.64	94.07	27719429	8280008504	98.35	94.99	38783924	5817588600	97.42	92.54	54416838	8162525700	98.66	95.53	41439806	6215970900	98.63	95.71	5.01644	0	0	0	0	2	6	8	7	7	7	7	7	6	7	7	7	7	7	7	7	7	7	7	7	7	7	7	7
C8826	22367000	6695659112	96.83	92.39	27356009	8162572692	98.2	94.67	44017750	6602662500	96.19	91.26	47029586	7054437900	98.35	94.84	44931334	6739700100	98.58	95.55	4.61667	0	0	0	1	5	7	6	7	7	7	7	7	6	7	7	7	7	7	7	7	7	7	7	7	7	7	7	7
C8828	19524963	5840905924	97.52	94.14	20840592	6196334782	97.14	92.8	36778038	5516705700	95.7	89.82	45147576	6772136400	98.71	95.69	55932364	8389854600	98.58	95.55	4.84298	0	0	0	0	0	0	2	0	2	1	2	2	1	0	1	1	1	3	4	2	0	0	0	0	1	6	6	3
C8829	21240272	6358498624	97.13	92.88	20505993	6120075902	97.98	94.17	37009930	5551489500	97.53	92.81	63796288	9569443200	98.74	95.98	41887326	6283098900	98.57	95.49	4.87938	0	0	1	1	7	5	5	8	8	7	5	7	8	7	7	7	7	6	6	7	7	7	7	5	7	7	7	7
C8830	16945800	5072369530	96.01	91.06	22619752	6754623118	98.17	94.72	55878952	8381842800	96.03	89.68	39661822	5949273300	98.58	95.21	59637996	8945699400	98.52	95.32	4.79181	0	1	6	0	4	7	6	6	7	7	7	6	6	7	6	7	7	7	7	7	7	5	7	7	7	7	6	6
C8831	19661731	5890538516	97.04	92.58	20183713	6021756506	98.48	95.39	46277890	6941683500	97.46	92.57	62710564	9406584600	98.76	96	49116954	7367543100	98.69	95.92	4.75667	0	0	4	5	6	6	7	6	7	8	7	6	7	7	6	7	7	7	7	6	7	7	5	5	7	6	5	6
C8833	17426081	5217990754	96.75	92.19	28272447	8428482476	98.23	94.99	37210832	5581624800	97.82	93.54	51422926	7713438900	98.56	95.14	/	/	/	/	4.92283	0	0	0	1	6	5	6	6	7	7	7	7	6	5	7	6	6	4	5	4	5	5	5	4	7	6	5	5
C8834	18973208	5676546888	96.32	91.36	20550389	6133616718	98.27	95.16	38988932	5848339800	97.75	93.39	60955138	9143270700	98.61	95.56	53246382	7986957300	98.66	95.81	4.88915	0	1	6	4	6	5	5	4	6	7	6	6	7	7	6	6	7	6	7	7	7	5	1	0	0	0	0	0
C8835	16587683	4962048152	97.39	93.73	19521118	5836621652	98.21	94.81	49805774	7470866100	97.34	92.33	52570428	7885564200	98.68	95.56	52940220	7941033000	98.52	95.41	4.59096	0	0	0	0	1	5	7	7	7	6	7	7	7	7	7	7	7	7	7	7	7	7	7	7	6	6	6	6
C8836	30733507	9194127540	97.34	93.61	26356654	7858013694	98.28	95.04	37055804	5558370600	97.73	93.34	62596738	9389510700	98.58	95.21	56608310	8491246500	98.59	95.56	5.03416	0	1	6	6	4	7	6	7	6	6	7	7	5	7	7	7	7	7	6	7	7	7	7	7	7	6	7	6
C8837	24760431	7409711740	97.1	93.17	22073672	6578556328	98.36	95.23	36837930	5525689500	95.65	89.66	51968938	7795340700	98.72	95.7	56951148	8542672200	98.54	95.45	4.8413	0	0	0	0	1	6	7	7	7	7	7	7	7	5	7	7	7	7	7	7	7	7	7	7	7	7	7	7
C8838	17259096	5163286160	96.96	92.68	29034308	8644986082	98.27	94.97	37565726	5634858900	97.42	92.51	55420524	8313078600	98.67	95.56	55604854	8340728100	98.56	95.55	4.87938	0	0	0	0	0	1	1	1	0	0	0	0	0	0	0	0	0	0	0	0	0	0	0	0	0	0	0	0
C8839	20164986	6038420956	96.49	91.74	29784240	8876293794	98.21	94.87	53117748	7967662200	96.61	90.44	55037032	8255554800	98.55	95.37	50487044	7573056600	98.66	95.81	4.96809	0	0	0	0	5	5	7	8	7	7	7	7	7	6	5	7	7	7	7	7	7	7	6	7	7	7	6	7
C8840	19354528	5788496222	97.4	93.79	21644550	6467070028	98.06	94.45	49788294	7468244100	97.82	93.56	56505678	8475851700	98.69	95.62	57403584	8610537600	98.63	95.74	4.67243	0	0	0	0	3	4	6	6	2	2	3	1	3	5	5	7	7	6	6	6	6	7	7	7	6	7	7	6
C8841	22201348	6646195498	96.84	92.37	21990793	6563617076	98.42	95.21	46385212	6957781800	97.27	92.26	52365802	7854870300	98.79	95.98	47223404	7083510600	98.65	95.76	5.03709	0	0	0	4	3	4	1	6	7	7	7	7	7	7	7	7	6	7	7	7	7	7	7	6	7	7	7	7
C8842	19015029	5689795446	97.15	92.81	19134450	5726079094	97.85	93.87	50842930	7626439500	95.73	89.24	54694920	8204238000	98.73	95.93	53754324	8063148600	98.51	95.35	/	0	0	0	0	1	1	7	7	6	7	7	7	6	5	7	6	4	3	1	0	0	0	0	0	0	0	0	1
C8843	19273882	5769154736	97.29	93.26	25047383	7482092768	98.38	95.07	40248748	6037312200	97.36	92.57	54717992	8207698800	98.6	95.34	44221526	6633228900	98.69	95.86	/	0	0	0	0	0	1	2	1	0	0	0	0	0	0	0	0	0	0	0	0	0	0	0	0	0	0	0	0
C8844	21039732	6297184910	97.12	92.86	20677255	6170469294	97.96	94.17	51763716	7764557400	97.12	91.79	48157180	7223577000	98.41	94.63	52250372	7837555800	97.67	93.28	4.79181	0	0	5	3	5	7	6	5	7	7	7	7	7	7	7	7	7	7	7	7	7	7	6	7	7	7	7	6
C8845	16432533	4917821612	96.5	91.86	25232695	7519842852	98.22	94.71	37687382	5653107300	97.61	93	49063766	7359564900	98.65	95.71	52997970	7949695500	98.8	95.97	4.97881	0	0	0	0	2	6	7	7	7	7	7	7	7	7	7	7	7	7	7	7	7	7	7	7	7	7	7	7
C8846	20055891	6000453298	96.5	91.89	25443685	7600364752	98.04	94.42	43613520	6542028000	97.59	92.97	78766176	11814926400	98.73	95.91	46806198	7020929700	98.69	95.85	4.82782	0	0	0	1	2	6	5	7	7	7	7	7	7	7	7	7	7	7	7	7	7	5	7	3	5	6	6	5
C8847	16922867	5067671670	97.59	93.9	27873559	8293197152	97.57	93.61	44214756	6632213400	97.12	91.79	76207030	11431054500	98.73	95.85	48363594	7254539100	98.69	95.67	4.56478	0	0	1	5	4	3	6	7	6	7	7	7	7	6	6	7	7	7	5	7	7	6	7	7	7	7	7	7
C8848	19847084	5942579724	97.04	92.75	21788512	6509468284	97.47	92.89	42176652	6326497800	96.21	91.39	52828900	7924335000	98.59	95.23	51424600	7713690000	98.69	95.59	5.08321	0	0	0	0	0	0	2	6	7	7	6	7	8	7	7	7	7	7	7	7	7	7	7	7	7	7	7	7
C8849	19702418	5890556264	96.2	91.29	20959109	6248514790	98.5	95.43	40562080	6084312000	97.6	93	47178296	7076744400	98.4	94.95	52043080	7806462000	98.59	95.62	4.6477	0	0	5	6	6	6	5	5	6	7	7	7	6	7	7	7	7	7	7	7	7	7	7	7	7	7	7	7
C8850	18695246	5587230092	97.42	93.8	20710770	6191410164	98.32	94.99	47326464	7098969600	97.61	93.05	41857190	6278578500	98.74	95.83	53311562	7996734300	98.68	95.85	/	0	0	0	5	7	6	7	7	7	7	7	7	7	4	0	0	0	0	0	0	7	7	5	7	7	7	7	7
C8851	22676968	6779870856	97.51	94.12	22148370	6619774432	98.09	94.4	42844528	6426679200	97.68	93.06	64986968	9748045200	98.65	95.67	42369068	6355360200	98.55	95.4	5.05166	0	0	0	7	5	7	7	7	7	7	7	7	7	7	5	7	7	7	7	7	7	7	7	7	7	7	6	7
C8852	18185755	5439791630	97.41	93.93	22321907	6661500928	98.28	95.04	39081502	5862225300	96.9	91.33	49031644	7354746600	98.55	95.17	53557664	8033649600	98.59	95.61	/	0	3	6	5	7	7	7	7	7	6	7	7	7	7	7	7	6	7	7	7	7	7	7	7	6	6	6	6
C8853	25549967	7642703198	97.32	93.54	19584533	5844428818	98.21	94.63	37984050	5697607500	97.68	93.25	52741298	7911194700	98.55	95.09	42918944	6437841600	98.68	95.88	4.95884	0	0	5	5	7	7	7	6	7	6	6	7	7	6	7	6	6	7	7	5	5	4	7	7	5	5	5	4
C8854	22198752	6639952932	97.65	94.33	24669553	7358118142	98.24	94.77	46244354	6936653100	97.13	91.91	56759086	8513862900	98.56	95.4	50872256	7630838400	98.69	95.9	4.74775	0	0	0	6	5	7	6	8	7	7	7	7	7	7	7	7	7	4	6	4	6	3	0	0	0	0	4	6
C8855	21851365	6537456432	97.56	94.11	27143621	8091765584	97.36	93.21	44511444	6676716600	97.75	93.29	55138392	8270758800	98.58	95.27	43652390	6547858500	98.57	95.48	4.97728	0	2	3	3	5	7	7	6	8	6	7	7	7	7	7	6	7	6	7	5	7	7	7	6	7	6	7	7
C8856	18442554	5518302216	95.86	90.49	24141407	7170886940	97.05	92.32	46319266	6947889900	97.66	93.18	47257446	7088616900	98.64	95.8	49943764	7491564600	98.67	95.82	4.88753	0	0	0	3	6	7	6	7	7	7	7	7	8	7	7	7	7	7	6	7	6	7	7	7	7	7	7	7
C8857	23567980	7042256508	97.33	93.64	23063341	6878506420	98.37	95.16	50103184	7515477600	97.34	92.41	58427842	8764176300	98.71	95.87	50306370	7545955500	98.71	95.97	4.83458	0	0	0	0	0	1	4	6	6	6	6	4	6	4	5	2	6	6	5	6	5	7	7	3	7	7	5	4
C8858	18569343	5554477402	96.48	91.88	19635303	5853837972	98.5	95.39	36195806	5429370900	97.43	92.59	44510396	6676559400	98.45	94.73	42485640	6372846000	98.55	95.48	4.9433	0	0	0	0	5	5	5	8	8	7	5	7	7	7	7	7	7	7	7	5	6	7	4	7	7	7	7	7
C8859	24563484	7344253240	97.29	93.68	29683952	8835887412	97.52	93.54	46544694	6981704100	97.82	93.48	37247636	5587145400	98.72	95.72	/	/	/	/	4.91169	0	0	3	3	2	6	3	6	4	6	4	0	0	4	6	7	6	6	5	5	5	5	6	6	5	2	3	1
C8860	18493653	5530432486	97.52	94.06	23586920	7044413118	98.37	95.08	37685296	5652794400	97.22	92.01	69256932	10388539800	98.56	95.34	45431714	6814757100	98.55	95.43	/	0	0	0	0	3	2	6	7	8	7	7	7	7	7	7	7	7	7	7	7	6	7	7	7	7	7	7	7
C8861	23724168	7098493466	97.44	93.94	20397828	6072121674	97.43	93.39	50135596	7520339400	97.38	92.47	69556414	10433462100	98.57	95.42	47036324	7055448600	98.64	95.73	5.04294	5	5	7	3	4	7	7	6	7	7	7	7	7	7	6	7	7	6	7	7	6	8	3	0	0	0	0	6
C8862	20030338	5988367320	97.28	93.7	21663389	6467034234	98.32	95.08	49509874	7426481100	98.03	94.2	40535918	6080387700	98.34	94.8	49008122	7351218300	98.72	96	4.87447	0	2	6	5	6	7	7	8	8	7	6	8	5	6	7	7	7	7	7	7	7	7	7	7	7	7	7	7
C8863	23453108	7015337204	97.36	93.83	19209480	5745120660	97.3	92.52	46660150	6999022500	97.14	91.72	43220390	6483058500	98.74	95.8	44142746	6621411900	98.48	95.26	5.14975	0	0	0	5	5	7	7	6	8	7	7	7	6	7	5	7	6	7	6	6	5	7	6	6	7	7	6	6
C8864	22354426	6686630904	97.5	94.05	20308539	6047125162	98.24	94.8	37991898	5698784700	97.07	91.69	41293900	6194085000	98.38	94.54	43261864	6489279600	98.54	95.46	5.0045	0	0	0	0	3	4	5	5	5	7	7	7	6	7	7	7	7	7	6	7	7	6	6	5	5	7	5	0
C8865	26832850	8025374874	97.49	94.05	21955052	6560637430	98.16	94.59	46103652	6915547800	97.8	93.53	44143382	6621507300	98.62	95.44	49730300	7459545000	98.71	95.92	5.02532	0	1	3	2	3	3	6	8	6	7	7	6	7	7	7	7	7	7	7	7	7	7	7	0	0	0	0	0
C8866	16545733	4953589550	97	92.72	23758310	7083350348	98.29	95.09	50847974	7627196100	97.43	92.68	58292802	8743920300	98.51	95.19	/	/	/	/	4.62838	0	0	4	3	7	5	6	7	4	7	7	7	7	6	4	6	6	6	6	6	6	6	5	7	6	6	5	4
C8867	20079758	6006727114	97.45	93.95	23184897	6914783994	98.02	94.35	49841206	7476180900	97.5	92.78	46353024	6952953600	98.35	94.43	45494156	6824123400	97.48	92.74	4.89724	0	0	0	0	2	7	7	7	7	7	7	7	7	7	4	7	6	7	7	7	7	7	7	7	7	7	7	7
C8868	20658300	6182179620	97.59	94.25	24179590	7201410864	97.32	93.12	44854668	6728200200	97.14	91.85	92288146	13843221900	98.71	95.81	39360454	5904068100	98.63	95.74	4.7866	0	0	0	5	6	6	7	7	7	6	7	7	7	7	6	7	6	7	7	7	7	6	7	7	7	7	7	4
C8869	23482474	7026280054	96.94	92.57	24059823	7180531268	98.25	94.91	39573678	5936051700	97.23	92.07	41039384	6155907600	98.7	95.63	58220290	8733043500	98.6	95.58	5.03855	0	0	5	5	7	5	8	7	6	7	7	7	7	7	7	7	7	7	7	7	7	7	7	6	4	0	0	0
C8870	20313705	6084344968	97.24	93.19	21743442	6472878274	98.25	94.91	47911548	7186732200	97.37	92.49	51022014	7653302100	98.4	94.91	49570184	7435527600	98.6	95.27	5.0268	0	7	6	3	0	5	6	8	8	7	6	7	6	7	7	7	7	7	7	7	7	7	7	7	7	6	7	5
C8871	18912951	5658065904	97.61	94.25	26365502	7847644692	97.43	93.31	42264780	6339717000	97.28	92.12	60517742	9077661300	98.7	95.8	51613854	7742078100	98.61	95.31	5.02385	0	0	4	3	6	5	7	7	7	7	7	7	7	7	7	7	7	7	7	7	7	5	7	7	6	5	7	3
C8872	19338858	5788706682	97	92.66	22418104	6691532170	98.3	94.92	50109634	7516445100	96.99	91.38	65385928	9807889200	98.62	95.62	47037568	7055635200	98.66	95.79	4.93231	0	0	0	0	4	6	6	5	5	5	4	7	6	7	6	5	7	6	7	6	7	7	7	7	7	7	5	6
C8873	22134820	6620876004	97.16	93.01	20816235	6214209184	98.27	94.91	39979188	5996878200	96.8	91.05	49813234	7471985100	98.67	95.52	47285352	7092802800	98.78	95.91	5.04731	0	0	0	5	3	6	6	8	7	5	6	7	5	6	7	7	6	7	6	5	6	6	5	7	7	6	6	5
C8874	19754963	5914731358	97.5	94	21948844	6545400462	98.41	95.19	40155096	6023264400	97.56	92.9	75637934	11345690100	98.63	95.65	55048006	8257200900	98.77	95.91	4.86295	0	0	0	5	7	4	6	7	7	7	7	7	7	7	7	7	7	7	7	7	7	7	7	7	7	7	7	5
C8875	20623954	6174066494	97.02	92.71	23155979	6912010290	98.07	94.59	40382486	6057372900	96.74	90.92	49099656	7364948400	98.63	95.38	56165348	8424802200	98.48	95.27	4.71149	0	2	7	8	7	7	5	3	7	7	7	6	7	7	7	7	7	6	5	6	7	5	3	0	0	0	0	3
C8876	23699514	7092570150	96.86	92.38	22076905	6589547370	98.2	94.81	39654076	5948111400	96.85	91.24	53891606	8083740900	98.52	95.08	51745822	7761873300	98.64	95.57	4.75489	0	0	0	4	7	7	7	7	7	7	7	7	7	7	6	7	7	7	7	7	6	7	6	7	6	7	4	5
C8877	22587254	6761569948	97.04	92.7	19320615	5780644676	97.48	92.97	/	/	/	/	48027922	7204188300	98.68	95.63	54271276	8140691400	98.65	95.81	4.95575	0	0	6	7	5	3	7	6	9	7	7	7	7	6	5	7	7	7	8	7	7	7	7	6	7	7	7	7
C8878	19377815	5801979038	97.09	92.75	20774977	6201156968	97.54	93.05	/	/	/	/	47538310	7130746500	98.34	94.41	56042690	8406403500	98.62	95.33	4.88915	0	0	0	2	6	4	5	3	6	7	7	7	7	7	7	7	7	7	7	7	7	7	7	7	7	7	7	6
C8879	17853574	5345231350	96.69	92.01	19671086	5872094752	98.43	95.14	48306532	7245979800	97.09	91.78	53658598	8048789700	98.78	95.96	/	/	/	/	4.96963	0	1	0	3	2	7	7	6	7	7	8	7	7	7	7	7	5	5	7	5	3	4	4	4	6	3	4	4
C8880	22004479	6585630234	97.01	92.61	23435426	6992568384	98.1	94.63	37651980	5647797000	97.3	92.16	39698268	5954740200	98.63	95.43	55310046	8296506900	98.62	95.62	/	0	0	0	5	7	7	7	7	7	7	7	6	6	7	6	7	7	7	7	7	6	7	7	7	7	7	7	0
C8881	22238255	6655847900	96.6	91.85	26926221	8015956962	98.27	94.94	41710746	6256611900	97.59	92.97	47777898	7166684700	98.27	94.19	49672758	7450913700	98.72	95.95	/	0	0	0	0	0	0	1	2	0	0	0	0	1	0	0	0	0	1	1	1	0	0	0	1	0	0	0	0
C8882	21921545	6562774054	97.24	93.2	27375647	8154892196	98.16	94.84	53679602	8051940300	96.08	90.11	49294274	7394141100	98.59	95.33	47517260	7127589000	98.73	95.95	5.05745	0	0	3	3	6	6	5	7	7	7	7	7	7	7	7	7	7	7	7	7	7	7	7	7	7	7	7	7
C8883	24494655	7332897606	97.18	93.06	27177090	8109018038	98.3	95.15	46738062	7010709300	97.16	92	59339038	8900855700	98.64	95.76	44224274	6633641100	98.65	95.47	/	0	3	7	4	4	7	7	6	6	7	7	7	7	7	7	7	7	7	2	0	0	0	0	6	6	7	6	7
C8885	17369413	5199869356	97.54	93.76	20375153	6072979548	98.43	95.16	49436936	7415540400	97.5	92.79	56092010	8413801500	98.61	95.35	56077458	8411618700	98.6	95.32	4.94017	0	2	4	3	4	6	7	6	7	7	5	7	6	6	7	6	7	7	7	6	7	7	7	7	6	6	7	6
C8886	17759758	5318249108	97.58	93.87	20030369	5975755976	98.46	95.26	48742284	7311342600	97.68	93.19	44818940	6722841000	98.29	94.23	57938772	8690815800	98.62	95.62	4.88264	0	3	5	7	7	7	7	7	8	7	7	7	7	7	7	7	7	7	7	7	7	7	7	6	7	7	7	7
C8887	17944866	5372775226	97.57	93.85	21765989	6500365490	98.42	95.17	44583340	6687501000	97.96	93.86	68510580	10276587000	98.5	95.2	38925912	5838886800	98.58	95.51	4.92125	0	0	1	4	6	1	7	3	3	5	6	4	6	4	5	6	7	6	6	6	7	5	5	6	6	6	6	7
C8888	17428813	5212215600	97.21	93.06	23742147	7072216396	98.59	95.53	44328744	6649311600	97.25	92.21	39252376	5887856400	98.64	95.43	47791666	7168749900	98.51	95.4	4.96347	0	0	0	5	7	5	6	6	7	7	7	7	7	7	7	7	7	7	7	6	7	7	7	7	7	7	7	6
C8969	17723768	5306928546	97.48	93.77	22977054	6853034840	98.23	94.73	48232176	7234826400	97.52	92.83	37463326	5619498900	98.72	95.7	59086732	8863009800	98.56	95.42	4.9573	0	1	1	4	5	4	3	5	7	6	7	7	5	0	0	3	7	6	7	7	6	6	6	7	7	7	7	7
C8970	17508763	5238093542	97.33	93.8	20087917	5993890840	98.38	95.11	54670158	8200523700	97.79	93.51	53584884	8037732600	98.53	95.08	46390882	6958632300	98.71	95.88	/	0	0	0	3	7	6	7	8	7	7	7	7	7	7	7	7	7	7	7	7	7	7	7	7	7	7	7	7
C8971	17977408	5382786558	97.4	93.54	21283483	6355237040	98.35	95.05	44065792	6609868800	97.71	93.14	66412488	9961873200	98.49	95.18	44290684	6643602600	98.56	95.46	4.80735	0	0	0	0	4	6	3	6	7	7	3	6	7	7	7	7	7	6	6	7	5	6	5	4	0	0	0	0
C8972	21406020	6402232126	97.23	93.39	26009048	7762640966	98.07	94.68	51521698	7728254700	96.33	89.88	49185016	7377752400	97.95	93.87	57428984	8614347600	98.64	95.73	/	0	0	0	1	5	7	3	5	3	7	6	6	2	1	4	7	7	3	0	0	0	0	0	0	0	4	3	7
C8973	18857926	5639059698	97.48	94	26119090	7800138672	98.02	94.38	49456256	7418438400	96.81	91.04	46368528	6955279200	98.57	95.17	47653094	7147964100	98.66	95.82	4.98489	0	0	0	5	7	5	7	5	7	7	7	7	7	6	7	7	7	7	7	6	6	5	6	3	0	0	0	0
C8974	18930365	5668079416	96.39	91.52	20406991	6094437494	97.95	94.17	37960504	5694075600	97.15	91.92	39838782	5975817300	98.32	94.31	47174350	7076152500	98.67	95.55	4.75132	0	0	0	4	6	6	6	8	7	7	7	5	7	7	7	7	7	7	7	7	7	7	7	7	7	7	7	7
C8975	20436755	6113612190	97.23	93.42	22371193	6668651506	98.43	95.17	52781202	7917180300	97.12	91.87	44032078	6604811700	98.63	95.45	43227318	6484097700	97.6	93.05	4.64386	0	0	0	0	1	5	7	7	7	7	7	7	7	4	6	5	7	7	5	4	3	6	6	5	6	6	4	5
C8976	20338270	6089368046	97.36	93.78	24441599	7296829984	98.33	94.99	39197186	5879577900	97.06	91.69	68049670	10207450500	98.64	95.67	57702946	8655441900	98.63	95.66	4.82103	0	0	0	4	5	5	7	6	7	7	7	6	7	7	7	7	7	7	7	7	7	7	7	7	7	7	7	6
C8977	17410214	5214103086	97.09	92.94	19322884	5766654314	98.42	95.16	48337874	7250681100	97.66	93.17	39875698	5981354700	98.58	95.22	46306158	6945923700	97.4	92.67	4.9573	0	0	2	6	4	6	6	7	6	6	7	7	7	7	7	7	6	6	7	7	7	7	7	7	7	7	7	6
C8978	23429186	7006946318	97.39	93.71	22499040	6709082410	98.38	95.27	51442630	7716394500	97.42	92.66	59383588	8907538200	98.66	95.76	45253084	6787962600	98.63	95.41	4.89239	0	2	7	4	8	7	7	7	7	7	7	7	7	7	7	7	4	7	6	7	7	7	7	7	5	4	6	4
C8979	21814527	6527218028	97.4	93.87	24944410	7456221062	97.86	93.94	38619784	5792967600	97.47	92.71	73376772	11006515800	98.66	95.74	48275690	7241353500	98.52	95.41	4.87611	0	0	2	7	6	4	7	7	7	7	7	6	7	7	7	7	7	7	6	7	7	6	6	7	6	7	6	5
C8980	20413192	6113052188	97.05	92.77	23725627	7083506552	98.36	95.03	52058054	7808708100	97	91.41	40536340	6080451000	98.41	94.65	42301302	6345195300	97.49	92.77	4.87774	0	2	6	2	5	6	7	7	7	7	7	7	7	7	7	7	7	7	7	7	7	7	7	7	7	5	7	6
C8981	19212584	5748619456	96.98	92.53	21799380	6491317372	98.47	95.26	37806962	5671044300	97.34	92.29	48655688	7298353200	97.58	92.79	56816406	8522460900	98.65	95.46	4.89724	0	0	0	1	5	7	8	7	7	7	7	7	7	7	7	7	7	6	7	5	7	5	7	7	6	7	7	6
C8982	16772647	5020513208	97.01	92.68	19214683	5727796108	98.5	95.33	45599702	6839955300	97.74	93.24	66323050	9948457500	98.68	95.82	45531688	6829753200	98.63	95.68	5.00749	0	0	1	4	7	5	6	7	7	7	7	7	7	7	7	7	7	7	7	7	7	7	7	7	7	7	7	7
C8984	19294172	5775899276	97.26	93.06	20871167	6229598988	97.53	93	36840196	5526029400	97.55	92.83	43947450	6592117500	98.56	95.56	55995446	8399316900	98.61	95.6	4.99699	0	7	6	3	7	4	7	6	7	7	7	7	6	7	7	7	7	7	7	7	7	7	6	7	7	7	7	7
C_A15	17325394	5184551830	97.09	92.75	/	/	/	/	/	/	/	/	/	/	/	/	/	/	/	/	5.63227	/	/	/	/	/	/	/	/	/	/	/	/	/	/	/	/	/	/	/	/	/	/	/	/	/	/	/	/
C_A21	18413362	5514757396	97.16	92.86	/	/	/	/	/	/	/	/	/	/	/	/	/	/	/	/	5.56428	/	/	/	/	/	/	/	/	/	/	/	/	/	/	/	/	/	/	/	/	/	/	/	/	/	/	/	/
C_A23	18898296	5660569916	97.22	92.98	/	/	/	/	/	/	/	/	/	/	/	/	/	/	/	/	5.56367	/	/	/	/	/	/	/	/	/	/	/	/	/	/	/	/	/	/	/	/	/	/	/	/	/	/	/	/
C_A29	17483970	5237050730	97.12	92.81	/	/	/	/	/	/	/	/	/	/	/	/	/	/	/	/	5.58115	/	/	/	/	/	/	/	/	/	/	/	/	/	/	/	/	/	/	/	/	/	/	/	/	/	/	/	/
C_A41	17282152	5176088932	97.26	93.15	/	/	/	/	/	/	/	/	/	/	/	/	/	/	/	/	5.57319	/	/	/	/	/	/	/	/	/	/	/	/	/	/	/	/	/	/	/	/	/	/	/	/	/	/	/	/
C_A56	17705300	5302767466	97.15	92.96	/	/	/	/	/	/	/	/	/	/	/	/	/	/	/	/	/	/	/	/	/	/	/	/	/	/	/	/	/	/	/	/	/	/	/	/	/	/	/	/	/	/	/	/	/
C_A59	17017422	5096193648	97.26	93.14	/	/	/	/	/	/	/	/	/	/	/	/	/	/	/	/	5.59146	/	/	/	/	/	/	/	/	/	/	/	/	/	/	/	/	/	/	/	/	/	/	/	/	/	/	/	/
C_A63	16635897	4982544968	97.19	93.03	/	/	/	/	/	/	/	/	/	/	/	/	/	/	/	/	5.63353	/	/	/	/	/	/	/	/	/	/	/	/	/	/	/	/	/	/	/	/	/	/	/	/	/	/	/	/
C_A70	18297067	5480224442	96.95	92.54	/	/	/	/	/	/	/	/	/	/	/	/	/	/	/	/	5.62751	/	/	/	/	/	/	/	/	/	/	/	/	/	/	/	/	/	/	/	/	/	/	/	/	/	/	/	/
C_A81	17148815	5135977000	97.13	92.9	/	/	/	/	/	/	/	/	/	/	/	/	/	/	/	/	5.55878	/	/	/	/	/	/	/	/	/	/	/	/	/	/	/	/	/	/	/	/	/	/	/	/	/	/	/	/
C_A82	19255817	5764001934	97.48	93.62	/	/	/	/	/	/	/	/	/	/	/	/	/	/	/	/	5.64366	/	/	/	/	/	/	/	/	/	/	/	/	/	/	/	/	/	/	/	/	/	/	/	/	/	/	/	/
C_A91	19115139	5725678286	97.04	92.67	/	/	/	/	/	/	/	/	/	/	/	/	/	/	/	/	5.56803	/	/	/	/	/	/	/	/	/	/	/	/	/	/	/	/	/	/	/	/	/	/	/	/	/	/	/	/
C_A98	16355200	4898742906	97.02	92.63	/	/	/	/	/	/	/	/	/	/	/	/	/	/	/	/	5.59365	/	/	/	/	/	/	/	/	/	/	/	/	/	/	/	/	/	/	/	/	/	/	/	/	/	/	/	/
C_B12	19641545	5884004114	97.09	92.67	/	/	/	/	/	/	/	/	/	/	/	/	/	/	/	/	5.52283	/	/	/	/	/	/	/	/	/	/	/	/	/	/	/	/	/	/	/	/	/	/	/	/	/	/	/	/
C_B16	18821350	5637243896	97.21	93.06	/	/	/	/	/	/	/	/	/	/	/	/	/	/	/	/	5.56753	/	/	/	/	/	/	/	/	/	/	/	/	/	/	/	/	/	/	/	/	/	/	/	/	/	/	/	/
C_B4	18549051	5555945456	97.23	93.02	/	/	/	/	/	/	/	/	/	/	/	/	/	/	/	/	5.34944	/	/	/	/	/	/	/	/	/	/	/	/	/	/	/	/	/	/	/	/	/	/	/	/	/	/	/	/
C_B44	18736313	5611872356	97.14	92.91	/	/	/	/	/	/	/	/	/	/	/	/	/	/	/	/	5.55776	/	/	/	/	/	/	/	/	/	/	/	/	/	/	/	/	/	/	/	/	/	/	/	/	/	/	/	/
C_B47	17373950	5203781642	97.34	93.28	/	/	/	/	/	/	/	/	/	/	/	/	/	/	/	/	5.54864	/	/	/	/	/	/	/	/	/	/	/	/	/	/	/	/	/	/	/	/	/	/	/	/	/	/	/	/
C_B6	17673712	5293496096	95.97	90.61	/	/	/	/	/	/	/	/	/	/	/	/	/	/	/	/	5.65163	/	/	/	/	/	/	/	/	/	/	/	/	/	/	/	/	/	/	/	/	/	/	/	/	/	/	/	/
C_B62	17244409	5164311144	96.56	91.71	/	/	/	/	/	/	/	/	/	/	/	/	/	/	/	/	5.63401	/	/	/	/	/	/	/	/	/	/	/	/	/	/	/	/	/	/	/	/	/	/	/	/	/	/	/	/
C_B85	16681766	4996388170	96.4	91.45	/	/	/	/	/	/	/	/	/	/	/	/	/	/	/	/	5.66562	/	/	/	/	/	/	/	/	/	/	/	/	/	/	/	/	/	/	/	/	/	/	/	/	/	/	/	/
C_C27	17366037	5201380876	96.78	92.15	/	/	/	/	/	/	/	/	/	/	/	/	/	/	/	/	5.59256	/	/	/	/	/	/	/	/	/	/	/	/	/	/	/	/	/	/	/	/	/	/	/	/	/	/	/	/
C_C39	16883843	5057309038	96.72	92.1	/	/	/	/	/	/	/	/	/	/	/	/	/	/	/	/	5.52	/	/	/	/	/	/	/	/	/	/	/	/	/	/	/	/	/	/	/	/	/	/	/	/	/	/	/	/
C_C42	18821888	5637766742	96.54	91.78	/	/	/	/	/	/	/	/	/	/	/	/	/	/	/	/	/	/	/	/	/	/	/	/	/	/	/	/	/	/	/	/	/	/	/	/	/	/	/	/	/	/	/	/	/
C_C56	19395983	5805238824	97.06	92.75	/	/	/	/	/	/	/	/	/	/	/	/	/	/	/	/	5.53947	/	/	/	/	/	/	/	/	/	/	/	/	/	/	/	/	/	/	/	/	/	/	/	/	/	/	/	/
C_C58	17015083	5096573944	96.62	91.83	/	/	/	/	/	/	/	/	/	/	/	/	/	/	/	/	5.58035	/	/	/	/	/	/	/	/	/	/	/	/	/	/	/	/	/	/	/	/	/	/	/	/	/	/	/	/
C_C63	17207813	5154077598	96.54	91.7	/	/	/	/	/	/	/	/	/	/	/	/	/	/	/	/	5.53055	/	/	/	/	/	/	/	/	/	/	/	/	/	/	/	/	/	/	/	/	/	/	/	/	/	/	/	/
C_C70	18709824	5603982266	96.57	91.8	/	/	/	/	/	/	/	/	/	/	/	/	/	/	/	/	5.63285	/	/	/	/	/	/	/	/	/	/	/	/	/	/	/	/	/	/	/	/	/	/	/	/	/	/	/	/
C_C80	17136231	5132873510	96.62	91.84	/	/	/	/	/	/	/	/	/	/	/	/	/	/	/	/	5.56671	/	/	/	/	/	/	/	/	/	/	/	/	/	/	/	/	/	/	/	/	/	/	/	/	/	/	/	/
C_C81	16476974	4935177042	96.8	92.25	/	/	/	/	/	/	/	/	/	/	/	/	/	/	/	/	5.48564	/	/	/	/	/	/	/	/	/	/	/	/	/	/	/	/	/	/	/	/	/	/	/	/	/	/	/	/
C_C9	18887969	5656617464	96.87	92.39	/	/	/	/	/	/	/	/	/	/	/	/	/	/	/	/	5.54659	/	/	/	/	/	/	/	/	/	/	/	/	/	/	/	/	/	/	/	/	/	/	/	/	/	/	/	/
C_D17	23517433	7043087332	96.72	92.13	/	/	/	/	/	/	/	/	/	/	/	/	/	/	/	/	5.47281	/	/	/	/	/	/	/	/	/	/	/	/	/	/	/	/	/	/	/	/	/	/	/	/	/	/	/	/
C_D18	16910727	5065108620	96.75	92.17	/	/	/	/	/	/	/	/	/	/	/	/	/	/	/	/	5.64289	/	/	/	/	/	/	/	/	/	/	/	/	/	/	/	/	/	/	/	/	/	/	/	/	/	/	/	/
C_D3	17376810	5205072250	97.09	92.79	/	/	/	/	/	/	/	/	/	/	/	/	/	/	/	/	5.56712	/	/	/	/	/	/	/	/	/	/	/	/	/	/	/	/	/	/	/	/	/	/	/	/	/	/	/	/
C_D30	19345832	5793134862	96.89	92.44	/	/	/	/	/	/	/	/	/	/	/	/	/	/	/	/	5.63682	/	/	/	/	/	/	/	/	/	/	/	/	/	/	/	/	/	/	/	/	/	/	/	/	/	/	/	/
C_D35	16941171	5073587250	96.56	91.81	/	/	/	/	/	/	/	/	/	/	/	/	/	/	/	/	5.6201	/	/	/	/	/	/	/	/	/	/	/	/	/	/	/	/	/	/	/	/	/	/	/	/	/	/	/	/
C_D5	19535297	5850477928	96.52	91.7	/	/	/	/	/	/	/	/	/	/	/	/	/	/	/	/	5.58826	/	/	/	/	/	/	/	/	/	/	/	/	/	/	/	/	/	/	/	/	/	/	/	/	/	/	/	/
C_D50	17023839	5097907532	97.16	92.97	/	/	/	/	/	/	/	/	/	/	/	/	/	/	/	/	5.56915	/	/	/	/	/	/	/	/	/	/	/	/	/	/	/	/	/	/	/	/	/	/	/	/	/	/	/	/
C_D62	17670092	5292849562	97.19	92.96	/	/	/	/	/	/	/	/	/	/	/	/	/	/	/	/	5.59624	/	/	/	/	/	/	/	/	/	/	/	/	/	/	/	/	/	/	/	/	/	/	/	/	/	/	/	/
C_D83	19100666	5720822292	96.59	91.79	/	/	/	/	/	/	/	/	/	/	/	/	/	/	/	/	5.61147	/	/	/	/	/	/	/	/	/	/	/	/	/	/	/	/	/	/	/	/	/	/	/	/	/	/	/	/
C_D84	17729925	5310197306	96.92	92.49	/	/	/	/	/	/	/	/	/	/	/	/	/	/	/	/	5.601	/	/	/	/	/	/	/	/	/	/	/	/	/	/	/	/	/	/	/	/	/	/	/	/	/	/	/	/
C_D85	17039025	5103729018	96.76	92.19	/	/	/	/	/	/	/	/	/	/	/	/	/	/	/	/	5.58436	/	/	/	/	/	/	/	/	/	/	/	/	/	/	/	/	/	/	/	/	/	/	/	/	/	/	/	/
C_D86	17223691	5158471558	96.75	92.14	/	/	/	/	/	/	/	/	/	/	/	/	/	/	/	/	/	/	/	/	/	/	/	/	/	/	/	/	/	/	/	/	/	/	/	/	/	/	/	/	/	/	/	/	/
[truncated: 1 more columns]
