# Supplementary material for: Mapping multitissue regulatory variants reveals a liver-centric coexpression network associated with duck egg-laying performance
Source: HighWire-hosted journal article supplement (doi:10.1101/gr.280345.124), 2025-09-10
Supplement: Supplemental_Table_S2.xlsx [file Supplemental_Table_S2.xlsx]

## Sheet: Sheet1
Supplemental Table S2. The number of molecular phenotypes retained in different tissues.
Tissue	Genes	Splicing Events	3'APA
Liver	14407	25124	4430
Ovary	20624	38658	6211
Shell gland	16492	32803	6954
Spleen	16009	33232	6259
