# Supplementary material for: Mapping multitissue regulatory variants reveals a liver-centric coexpression network associated with duck egg-laying performance
Source: HighWire-hosted journal article supplement (doi:10.1101/gr.280345.124), 2025-09-10
Supplement: Supplemental_Table_S3.xlsx [file Supplemental_Table_S3.xlsx]

## Sheet: Sheet1
Supplemental Table S3. The gene annotations of alternative splicing and 3’APA events.
Phenotype_id	Type	Annotated Gene
chr1:100369878:100370071:clu_6068_+	Splicing event	LOC113841090
chr1:100369878:100370076:clu_6068_+	Splicing event	LOC113841090
chr1:101778567:101779750:clu_2108_-	Splicing event	ROBO2
chr1:101779851:101784340:clu_2109_-	Splicing event	ROBO2
chr1:101815257:101820085:clu_2111_-	Splicing event	ROBO2
chr1:101820366:101825821:clu_2111_-	Splicing event	ROBO2
chr1:101825948:101827557:clu_2112_-	Splicing event	ROBO2
chr1:101827599:101837397:clu_2112_-	Splicing event	ROBO2
chr1:102929844:102933868:clu_2120_-	Splicing event	LIPI
chr1:102941119:102942300:clu_2121_-	Splicing event	LIPI
chr1:102941119:102945425:clu_2121_-	Splicing event	LIPI
chr1:102941119:102945709:clu_2121_-	Splicing event	LIPI
chr1:102942676:102945425:clu_2121_-	Splicing event	LIPI
chr1:102942676:102945709:clu_2121_-	Splicing event	LIPI
chr1:102950634:102952194:clu_6109_+	Splicing event	RBM11
chr1:102952505:102954276:clu_6109_+	Splicing event	RBM11
chr1:102952560:102954276:clu_6109_+	Splicing event	RBM11
chr1:102954422:102955290:clu_6110_+	Splicing event	RBM11
chr1:102954438:102955290:clu_6110_+	Splicing event	RBM11
chr1:102955368:102956060:clu_6110_+	Splicing event	RBM11
chr1:102993578:102994867:clu_6112_+	Splicing event	LOC101794339
chr1:102994928:102997504:clu_6112_+	Splicing event	LOC101794339
chr1:102997645:102998025:clu_6113_+	Splicing event	LOC101794339
chr1:102997645:102999215:clu_6113_+	Splicing event	LOC101794339
chr1:102998188:102999215:clu_6113_+	Splicing event	LOC101794339
chr1:103001369:103002863:clu_6115_+	Splicing event	LOC101794339
chr1:103007875:103008469:clu_6117_+	Splicing event	LOC101794339
chr1:103008645:103008956:clu_6117_+	Splicing event	LOC101794339
chr1:103015195:103015665:clu_6118_+	Splicing event	LOC101794339
chr1:103015819:103016943:clu_6118_+	Splicing event	LOC101794339
chr1:103024451:103025384:clu_6120_+	Splicing event	LOC101794339
chr1:103025578:103026072:clu_6120_+	Splicing event	LOC101794339
chr1:103034803:103035721:clu_2123_-	Splicing event	HSPA13
chr1:103034803:103035738:clu_2123_-	Splicing event	HSPA13
chr1:103034870:103035721:clu_2123_-	Splicing event	HSPA13
chr1:103084504:103102623:clu_2126_-	Splicing event	SAMSN1
chr1:103276167:103295732:clu_2134_-	Splicing event	NRIP1
chr1:103276167:103341357:clu_2134_-	Splicing event	NRIP1
chr1:103295780:103322229:clu_2134_-	Splicing event	NRIP1
chr1:103295780:103341357:clu_2134_-	Splicing event	NRIP1
chr1:103322319:103341357:clu_2134_-	Splicing event	NRIP1
chr1:103341441:103347310:clu_2135_-	Splicing event	NRIP1
chr1:103341441:103347752:clu_2135_-	Splicing event	NRIP1
chr1:103341441:103348063:clu_2135_-	Splicing event	NRIP1
chr1:103341441:103348442:clu_2135_-	Splicing event	NRIP1
chr1:103341441:103348599:clu_2135_-	Splicing event	NRIP1
chr1:103341441:103371590:clu_2135_-	Splicing event	NRIP1
chr1:103360553:103371590:clu_2135_-	Splicing event	NRIP1
chr1:103365280:103371590:clu_2135_-	Splicing event	NRIP1
chr1:103615070:103624365:clu_6124_+	Splicing event	USP25
chr1:103615070:103630379:clu_6124_+	Splicing event	USP25
chr1:103624488:103630379:clu_6124_+	Splicing event	USP25
chr1:103666094:103667222:clu_6126_+	Splicing event	USP25
chr1:103666094:103675677:clu_6126_+	Splicing event	USP25
chr1:103667361:103675677:clu_6126_+	Splicing event	USP25
chr1:104343910:104344345:clu_6134_+	Splicing event	CXADR
chr1:104343910:104344708:clu_6134_+	Splicing event	CXADR
chr1:104395223:104406395:clu_2138_-	Splicing event	C1H21orf91
chr1:104406525:104406753:clu_2138_-	Splicing event	C1H21orf91
chr1:107631755:107632498:clu_6156_+	Splicing event	JAM2
chr1:107632513:107633439:clu_6156_+	Splicing event	JAM2
chr1:107640247:107642603:clu_6157_+	Splicing event	GABPA
chr1:107642421:107642603:clu_6157_+	Splicing event	GABPA
chr1:107707635:107725192:clu_2148_-	Splicing event	LOC101804251
chr1:107756863:107757993:clu_2149_-	Splicing event	LOC101804251
chr1:107765909:107793242:clu_2150_-	Splicing event	LOC101804251
chr1:109161022:109161714:clu_6166_+	Splicing event	N6AMT1
chr1:109161022:109162430:clu_6166_+	Splicing event	N6AMT1
chr1:109161800:109162430:clu_6166_+	Splicing event	N6AMT1
chr1:109196491:109197137:clu_2165_-	Splicing event	RWDD2B
chr1:109196491:109197320:clu_2165_-	Splicing event	RWDD2B
chr1:109197204:109197320:clu_2165_-	Splicing event	RWDD2B
chr1:109200796:109202465:clu_6168_+	Splicing event	USP16
chr1:109202643:109203329:clu_6169_+	Splicing event	USP16
chr1:109202643:109205818:clu_6169_+	Splicing event	USP16
chr1:109203432:109205818:clu_6169_+	Splicing event	USP16
chr1:109205921:109207423:clu_6167_+	Splicing event	USP16
chr1:109205921:109207426:clu_6167_+	Splicing event	USP16
chr1:109213578:109214365:clu_6172_+	Splicing event	USP16
chr1:109214535:109214958:clu_6172_+	Splicing event	USP16
chr1:109221387:109222013:clu_2176_-	Splicing event	CCT8
chr1:109222111:109222559:clu_2176_-	Splicing event	CCT8
chr1:109343267:109353969:clu_6176_+	Splicing event	BACH1
chr1:109346709:109353969:clu_6176_+	Splicing event	BACH1
chr1:109353417:109353969:clu_6176_+	Splicing event	BACH1
chr1:109993230:109998756:clu_6189_+	Splicing event	HUNK
chr1:109998891:110000711:clu_6189_+	Splicing event	HUNK
chr1:110000838:110006603:clu_6189_+	Splicing event	HUNK
chr1:110012361:110017198:clu_6190_+	Splicing event	HUNK
chr1:110012361:110017315:clu_6190_+	Splicing event	HUNK
chr1:110127799:110128523:clu_2203_-	Splicing event	MIS18A
chr1:110129951:110134703:clu_6192_+	Splicing event	LOC101789456
chr1:110134802:110142587:clu_6192_+	Splicing event	LOC101789456
chr1:110141296:110142235:clu_6192_+	Splicing event	LOC101789456
chr1:110141296:110142587:clu_6192_+	Splicing event	LOC101789456
chr1:110142431:110142587:clu_6192_+	Splicing event	LOC101789456
chr1:110178872:110181402:clu_2216_-	Splicing event	URB1
chr1:110187361:110188750:clu_2217_-	Splicing event	URB1
chr1:110216567:110219725:clu_6194_+	Splicing event	EVA1C
chr1:110219848:110222461:clu_6193_+	Splicing event	EVA1C
chr1:110222613:110231653:clu_6193_+	Splicing event	EVA1C
chr1:110265091:110272315:clu_2225_-	Splicing event	SYNJ1
chr1:110285184:110291130:clu_2228_-	Splicing event	SYNJ1
chr1:110291295:110294464:clu_2228_-	Splicing event	SYNJ1
chr1:110294616:110296513:clu_2230_-	Splicing event	SYNJ1
chr1:110296594:110299169:clu_2230_-	Splicing event	SYNJ1
chr1:110337736:110340006:clu_2234_-	Splicing event	PAXBP1
chr1:110337736:110340023:clu_2234_-	Splicing event	PAXBP1
chr1:110344819:110345528:clu_2235_-	Splicing event	PAXBP1
chr1:110346885:110347609:clu_2236_-	Splicing event	PAXBP1
chr1:110511523:110511595:clu_6197_+	Splicing event	IFNAR2
chr1:110511762:110512340:clu_6197_+	Splicing event	IFNAR2
chr1:110512156:110512340:clu_6197_+	Splicing event	IFNAR2
chr1:110512414:110514129:clu_6198_+	Splicing event	IFNAR2
chr1:110512495:110514129:clu_6198_+	Splicing event	IFNAR2
chr1:110517398:110517734:clu_6199_+	Splicing event	IFNAR2
chr1:110526483:110527586:clu_6201_+	Splicing event	IL10RB
chr1:110526483:110528965:clu_6201_+	Splicing event	IL10RB
chr1:110527709:110528015:clu_6201_+	Splicing event	IL10RB
chr1:110527709:110528965:clu_6201_+	Splicing event	IL10RB
chr1:110528222:110528965:clu_6201_+	Splicing event	IL10RB
chr1:110592301:110593187:clu_6202_+	Splicing event	IFNGR2
chr1:110601457:110601850:clu_2240_-	Splicing event	TMEM50B
chr1:110604507:110605166:clu_2241_-	Splicing event	TMEM50B
chr1:110605343:110609034:clu_2242_-	Splicing event	TMEM50B
chr1:110613033:110614474:clu_2243_-	Splicing event	DNAJC28
chr1:110613033:110614534:clu_2243_-	Splicing event	DNAJC28
chr1:110614660:110615046:clu_2246_-	Splicing event	DNAJC28
chr1:110614660:110615048:clu_2246_-	Splicing event	DNAJC28
chr1:110614660:110615152:clu_2246_-	Splicing event	DNAJC28
chr1:110672195:110674721:clu_2239_-	Splicing event	LOC101803101
chr1:110672195:110680592:clu_2239_-	Splicing event	LOC101803101
chr1:110683100:110684420:clu_6203_+	Splicing event	SON
chr1:110683772:110684420:clu_6203_+	Splicing event	SON
chr1:110705501:110712201:clu_6204_+	Splicing event	SON
chr1:110712280:110712998:clu_6204_+	Splicing event	SON
chr1:110738293:110739097:clu_2255_-	Splicing event	CRYZL1
chr1:110741268:110745137:clu_2254_-	Splicing event	CRYZL1
chr1:110792304:110794015:clu_6217_+	Splicing event	ITSN1
chr1:110792304:110794661:clu_6217_+	Splicing event	ITSN1
chr1:110794194:110794661:clu_6217_+	Splicing event	ITSN1
chr1:110796487:110798695:clu_6220_+	Splicing event	ITSN1
chr1:110798832:110799755:clu_6220_+	Splicing event	ITSN1
chr1:110821865:110823244:clu_6222_+	Splicing event	ITSN1
chr1:110821931:110823244:clu_6222_+	Splicing event	ITSN1
chr1:110851497:110861682:clu_6223_+	Splicing event	ITSN1
chr1:110861803:110862745:clu_6224_+	Splicing event	ITSN1
chr1:110862851:110864138:clu_6224_+	Splicing event	ITSN1
chr1:110864321:110864768:clu_6225_+	Splicing event	ITSN1
chr1:110864866:110865717:clu_6225_+	Splicing event	ITSN1
chr1:110865884:110866982:clu_6226_+	Splicing event	ITSN1
chr1:110867848:110869254:clu_6227_+	Splicing event	ITSN1
chr1:110867848:110870026:clu_6227_+	Splicing event	ITSN1
chr1:110869302:110870026:clu_6227_+	Splicing event	ITSN1
chr1:110952528:110956346:clu_6218_+	Splicing event	SLC5A3
chr1:111214985:111215950:clu_2258_-	Splicing event	RCAN1
chr1:111216123:111218277:clu_2258_-	Splicing event	RCAN1
chr1:111216123:111248608:clu_2258_-	Splicing event	RCAN1
chr1:111280602:111281032:clu_6219_+	Splicing event	CLIC6
chr1:111317745:111342583:clu_2259_-	Splicing event	RUNX1
chr1:111342774:111358846:clu_2259_-	Splicing event	RUNX1
chr1:111375494:111379699:clu_2260_-	Splicing event	RUNX1
chr1:1116626:1117267:clu_3827_+	Splicing event	AHCYL2
chr1:1117367:1118158:clu_3827_+	Splicing event	AHCYL2
chr1:111867705:111868451:clu_2268_-	Splicing event	SETD4
chr1:111868880:111870023:clu_2268_-	Splicing event	SETD4
chr1:111871674:111872630:clu_2270_-	Splicing event	SETD4
chr1:111872725:111873173:clu_2270_-	Splicing event	SETD4
chr1:111873878:111874782:clu_6232_+	Splicing event	LOC101794661
chr1:111874499:111874782:clu_6232_+	Splicing event	LOC101794661
chr1:111878505:111880113:clu_6233_+	Splicing event	LOC101794661
chr1:111909254:111910284:clu_6238_+	Splicing event	DOP1B
chr1:111910384:111911042:clu_6238_+	Splicing event	DOP1B
chr1:111911232:111912921:clu_6238_+	Splicing event	DOP1B
chr1:111911232:111912924:clu_6238_+	Splicing event	DOP1B
chr1:111914535:111915146:clu_6239_+	Splicing event	DOP1B
chr1:111915257:111915869:clu_6239_+	Splicing event	DOP1B
chr1:111916051:111916741:clu_6239_+	Splicing event	DOP1B
chr1:111939577:111942980:clu_6243_+	Splicing event	MORC3
chr1:111949716:111953965:clu_6243_+	Splicing event	MORC3
chr1:111969133:111971410:clu_6247_+	Splicing event	CHAF1B
chr1:111971506:111972786:clu_6247_+	Splicing event	CHAF1B
chr1:111974823:111975705:clu_6249_+	Splicing event	CHAF1B
chr1:111975867:111976991:clu_6249_+	Splicing event	CHAF1B
chr1:112311632:112312125:clu_6255_+	Splicing event	TTC3
chr1:112312034:112312125:clu_6255_+	Splicing event	TTC3
chr1:112316439:112316851:clu_6256_+	Splicing event	TTC3
chr1:112316439:112316854:clu_6256_+	Splicing event	TTC3
chr1:112316938:112317886:clu_6260_+	Splicing event	TTC3
chr1:112317939:112320332:clu_6260_+	Splicing event	TTC3
chr1:112332393:112334725:clu_6257_+	Splicing event	TTC3
chr1:112334785:112338857:clu_6258_+	Splicing event	TTC3
chr1:112334785:112341663:clu_6258_+	Splicing event	TTC3
chr1:112338923:112341663:clu_6258_+	Splicing event	TTC3
chr1:112343626:112345043:clu_6262_+	Splicing event	TTC3
chr1:112345169:112346575:clu_6262_+	Splicing event	TTC3
chr1:112352478:112353229:clu_6263_+	Splicing event	TTC3
chr1:112353492:112353928:clu_6263_+	Splicing event	TTC3
chr1:112354450:112355769:clu_6264_+	Splicing event	TTC3
chr1:112354450:112356594:clu_6264_+	Splicing event	TTC3
chr1:112355845:112356594:clu_6264_+	Splicing event	TTC3
chr1:112366247:112367160:clu_6266_+	Splicing event	TTC3
chr1:112366247:112367163:clu_6266_+	Splicing event	TTC3
chr1:113265720:113266599:clu_2283_-	Splicing event	PSMG1
chr1:113269335:113270762:clu_2284_-	Splicing event	PSMG1
chr1:113270871:113270960:clu_2284_-	Splicing event	PSMG1
chr1:113339055:113340451:clu_6280_+	Splicing event	GET1
chr1:113339171:113340451:clu_6280_+	Splicing event	GET1
chr1:113339514:113340451:clu_6280_+	Splicing event	GET1
chr1:113384615:113389248:clu_6284_+	Splicing event	SH3BGR
chr1:113389277:113391225:clu_6284_+	Splicing event	SH3BGR
chr1:113439874:113440928:clu_6286_+	Splicing event	IGSF5
chr1:113439874:113445346:clu_6286_+	Splicing event	IGSF5
chr1:113441069:113445346:clu_6286_+	Splicing event	IGSF5
chr1:113441236:113445346:clu_6286_+	Splicing event	IGSF5
chr1:1136107:1136391:clu_3829_+	Splicing event	STRIP2
chr1:1136459:1136563:clu_3829_+	Splicing event	STRIP2
chr1:1137667:1138456:clu_3831_+	Splicing event	STRIP2
chr1:1138521:1139132:clu_3831_+	Splicing event	STRIP2
chr1:1141244:1142777:clu_3833_+	Splicing event	STRIP2
chr1:11426642:11426743:clu_236_-	Splicing event	LOC101797591
chr1:1142877:1144254:clu_3833_+	Splicing event	STRIP2
chr1:114416199:114418190:clu_2313_-	Splicing event	RPS6KA3
chr1:114416202:114418190:clu_2313_-	Splicing event	RPS6KA3
chr1:114423170:114426382:clu_2314_-	Splicing event	RPS6KA3
chr1:114436745:114461320:clu_2315_-	Splicing event	RPS6KA3
chr1:114436749:114449483:clu_2315_-	Splicing event	RPS6KA3
chr1:114948634:114955293:clu_6305_+	Splicing event	CNKSR2
chr1:114955352:114960616:clu_6305_+	Splicing event	CNKSR2
chr1:114960684:114976483:clu_6305_+	Splicing event	CNKSR2
chr1:114976629:114986379:clu_6305_+	Splicing event	CNKSR2
chr1:114989740:114992987:clu_6306_+	Splicing event	CNKSR2
chr1:114993076:114994700:clu_6306_+	Splicing event	CNKSR2
chr1:115035491:115068968:clu_6308_+	Splicing event	CNKSR2
chr1:115069164:115072271:clu_6308_+	Splicing event	CNKSR2
chr1:115199994:115223065:clu_6312_+	Splicing event	SMS
chr1:1152011:1152134:clu_36_-	Splicing event	LOC113844150
chr1:115207726:115223065:clu_6312_+	Splicing event	SMS
chr1:1152307:1154151:clu_36_-	Splicing event	LOC113844150
chr1:115231776:115231877:clu_6313_+	Splicing event	SMS
chr1:1153542:1154151:clu_36_-	Splicing event	LOC113844150
chr1:1153549:1154151:clu_36_-	Splicing event	LOC113844150
chr1:115359669:115362701:clu_6314_+	Splicing event	PHEX
chr1:115362766:115362887:clu_6314_+	Splicing event	PHEX
chr1:1154937:1155921:clu_3834_+	Splicing event	SMKR1
chr1:1156005:1157145:clu_3834_+	Splicing event	SMKR1
chr1:1157254:1157386:clu_3834_+	Splicing event	SMKR1
chr1:1157443:1159604:clu_3834_+	Splicing event	SMKR1
chr1:115907373:115909602:clu_6316_+	Splicing event	PRDX4
chr1:115914351:115915216:clu_6320_+	Splicing event	PRDX4
chr1:115914351:115915303:clu_6320_+	Splicing event	PRDX4
chr1:115914351:115915701:clu_6320_+	Splicing event	PRDX4
chr1:115915349:115915701:clu_6320_+	Splicing event	PRDX4
chr1:115931825:115935471:clu_2324_-	Splicing event	ACOT9
chr1:115931825:115939995:clu_2324_-	Splicing event	ACOT9
chr1:115935516:115938344:clu_2324_-	Splicing event	ACOT9
chr1:115938370:115939995:clu_2324_-	Splicing event	ACOT9
chr1:115946104:115946480:clu_6317_+	Splicing event	SAT1
chr1:115946500:115947717:clu_6318_+	Splicing event	SAT1
chr1:115946563:115946870:clu_6318_+	Splicing event	SAT1
chr1:115946977:115947717:clu_6318_+	Splicing event	SAT1
chr1:115980165:115981603:clu_2329_-	Splicing event	APOO
chr1:1159803:1161488:clu_3835_+	Splicing event	SMKR1
chr1:115983555:115985939:clu_2330_-	Splicing event	APOO
chr1:115986049:115987286:clu_2331_-	Splicing event	APOO
chr1:1159983:1161488:clu_3835_+	Splicing event	SMKR1
chr1:116005021:116013042:clu_2332_-	Splicing event	KLHL15
chr1:116005021:116013108:clu_2332_-	Splicing event	KLHL15
chr1:116013819:116021773:clu_2333_-	Splicing event	KLHL15
chr1:116023473:116023946:clu_2335_-	Splicing event	KLHL15
chr1:116023473:116025346:clu_2335_-	Splicing event	KLHL15
chr1:116024023:116025346:clu_2335_-	Splicing event	KLHL15
chr1:116113337:116114718:clu_6324_+	Splicing event	LOC101796588
chr1:116114823:116115273:clu_6324_+	Splicing event	LOC101796588
chr1:116248766:116250251:clu_6328_+	Splicing event	POLA1
chr1:116250349:116252226:clu_6328_+	Splicing event	POLA1
chr1:116278358:116313243:clu_6322_+	Splicing event	POLA1
chr1:116312925:116313243:clu_6322_+	Splicing event	POLA1
chr1:116313144:116313243:clu_6322_+	Splicing event	POLA1
chr1:1171878:1172102:clu_38_-	Splicing event	LOC119718463
chr1:1172145:1172492:clu_39_-	Splicing event	LOC119718463
chr1:118632281:118632800:clu_6335_+	Splicing event	GK
chr1:118652645:118654146:clu_6337_+	Splicing event	GK
chr1:118652645:118657423:clu_6337_+	Splicing event	GK
chr1:118652666:118657340:clu_6337_+	Splicing event	GK
chr1:118654232:118657340:clu_6337_+	Splicing event	GK
chr1:118696323:118698724:clu_2353_-	Splicing event	TAB3
chr1:118696323:118698735:clu_2353_-	Splicing event	TAB3
chr1:118698895:118702547:clu_2354_-	Splicing event	TAB3
chr1:118702684:118702865:clu_2354_-	Splicing event	TAB3
chr1:118702720:118702865:clu_2354_-	Splicing event	TAB3
chr1:118703996:118705467:clu_2353_-	Splicing event	TAB3
chr1:120348054:120357021:clu_2364_-	Splicing event	TMEM47
chr1:120357161:120371177:clu_2364_-	Splicing event	TMEM47
chr1:121042045:121057247:clu_6342_+	Splicing event	PRRG1
chr1:121061643:121069131:clu_6343_+	Splicing event	PRRG1
chr1:121061643:121069404:clu_6343_+	Splicing event	PRRG1
chr1:121069192:121069404:clu_6343_+	Splicing event	PRRG1
chr1:121370167:121371496:clu_2384_-	Splicing event	RPGR
chr1:121370167:121371745:clu_2384_-	Splicing event	RPGR
chr1:121371535:121371745:clu_2384_-	Splicing event	RPGR
chr1:121391591:121392538:clu_2387_-	Splicing event	RPGR
chr1:121421336:121427808:clu_2389_-	Splicing event	RPGR
chr1:121427933:121429097:clu_2390_-	Splicing event	RPGR
chr1:121943252:121947266:clu_2397_-	Splicing event	BCOR
chr1:121943252:121948020:clu_2397_-	Splicing event	BCOR
chr1:121947517:121948020:clu_2397_-	Splicing event	BCOR
chr1:121947619:121948020:clu_2397_-	Splicing event	BCOR
chr1:121948301:121955136:clu_2398_-	Splicing event	BCOR
chr1:121955319:121955781:clu_2398_-	Splicing event	BCOR
chr1:121955319:121956536:clu_2398_-	Splicing event	BCOR
chr1:121955834:121956536:clu_2398_-	Splicing event	BCOR
chr1:121961900:121980418:clu_2399_-	Splicing event	BCOR
chr1:121961900:121981028:clu_2399_-	Splicing event	BCOR
chr1:122295431:122295556:clu_6369_+	Splicing event	USP9X
chr1:122295702:122296437:clu_6369_+	Splicing event	USP9X
chr1:122296644:122298307:clu_6370_+	Splicing event	USP9X
chr1:122330996:122331379:clu_2408_-	Splicing event	RPL8
chr1:122373782:122374400:clu_6368_+	Splicing event	DDX3X
chr1:122432192:122437142:clu_2411_-	Splicing event	CASK
chr1:122438727:122441495:clu_2412_-	Splicing event	CASK
chr1:122438727:122442897:clu_2412_-	Splicing event	CASK
chr1:122438727:122448824:clu_2412_-	Splicing event	CASK
chr1:122441530:122442897:clu_2412_-	Splicing event	CASK
chr1:122441530:122448824:clu_2412_-	Splicing event	CASK
chr1:122442965:122448824:clu_2412_-	Splicing event	CASK
chr1:123274531:123277097:clu_2431_-	Splicing event	EFHC2
chr1:123277202:123284304:clu_2431_-	Splicing event	EFHC2
chr1:123294232:123299197:clu_2434_-	Splicing event	EFHC2
chr1:123300585:123308516:clu_2436_-	Splicing event	EFHC2
chr1:123308654:123308958:clu_2436_-	Splicing event	EFHC2
chr1:123510276:123510721:clu_6381_+	Splicing event	KDM6A
chr1:123510276:123511528:clu_6381_+	Splicing event	KDM6A
chr1:123510876:123511528:clu_6381_+	Splicing event	KDM6A
chr1:123800879:123801359:clu_6388_+	Splicing event	LOC119714956
chr1:123801212:123801297:clu_6386_+	Splicing event	LOC119714956
chr1:124331114:124352508:clu_6405_+	Splicing event	LOC101802919
chr1:124353052:124357592:clu_6405_+	Splicing event	LOC101802919
chr1:124383090:124384131:clu_2448_-	Splicing event	PWP2
chr1:124384278:124384916:clu_2448_-	Splicing event	PWP2
chr1:124456665:124459730:clu_2461_-	Splicing event	AGPAT3
chr1:124468699:124473999:clu_2462_-	Splicing event	AGPAT3
chr1:124468699:124499595:clu_2462_-	Splicing event	AGPAT3
chr1:124468699:124500204:clu_2462_-	Splicing event	AGPAT3
chr1:124468699:124505427:clu_2462_-	Splicing event	AGPAT3
chr1:124468699:124509538:clu_2462_-	Splicing event	AGPAT3
chr1:124468699:124538337:clu_2462_-	Splicing event	AGPAT3
chr1:124499674:124500204:clu_2462_-	Splicing event	AGPAT3
chr1:124500324:124505427:clu_2462_-	Splicing event	AGPAT3
chr1:124500324:124509538:clu_2462_-	Splicing event	AGPAT3
chr1:124500324:124538337:clu_2462_-	Splicing event	AGPAT3
chr1:124663151:124663875:clu_2467_-	Splicing event	RRP1B
chr1:124663932:124664842:clu_2467_-	Splicing event	RRP1B
chr1:124667890:124669863:clu_6407_+	Splicing event	LOC101791355
chr1:124667890:124678137:clu_6407_+	Splicing event	LOC101791355
chr1:124670013:124674411:clu_6407_+	Splicing event	LOC101791355
chr1:124674514:124678137:clu_6407_+	Splicing event	LOC101791355
chr1:124678286:124682466:clu_6407_+	Splicing event	LOC101791355
chr1:124678286:124684299:clu_6407_+	Splicing event	LOC101791355
chr1:124682604:124684299:clu_6407_+	Splicing event	LOC101791355
chr1:124688902:124696646:clu_6409_+	Splicing event	LOC101791355
chr1:124769137:124769630:clu_6415_+	Splicing event	SIK1
chr1:124771312:124771929:clu_6414_+	Splicing event	SIK1
chr1:124912548:124912779:clu_6428_+	Splicing event	U2AF1
chr1:124912548:124915229:clu_6428_+	Splicing event	U2AF1
chr1:124912548:124916116:clu_6428_+	Splicing event	U2AF1
chr1:124912835:124915229:clu_6428_+	Splicing event	U2AF1
chr1:124912835:124916116:clu_6428_+	Splicing event	U2AF1
chr1:124915295:124916116:clu_6428_+	Splicing event	U2AF1
chr1:124915295:124919565:clu_6428_+	Splicing event	U2AF1
chr1:124916182:124919565:clu_6428_+	Splicing event	U2AF1
chr1:124921806:124921921:clu_6430_+	Splicing event	U2AF1
chr1:124922021:124923767:clu_6430_+	Splicing event	U2AF1
chr1:124939814:124940390:clu_6434_+	Splicing event	LOC101797717
chr1:124940496:124940865:clu_6434_+	Splicing event	LOC101797717
chr1:124940999:124943204:clu_6433_+	Splicing event	LOC101797717
chr1:124943283:124943889:clu_6433_+	Splicing event	LOC101797717
chr1:125009896:125010386:clu_2475_-	Splicing event	PKNOX1
chr1:125009896:125011965:clu_2475_-	Splicing event	PKNOX1
chr1:125010485:125011965:clu_2475_-	Splicing event	PKNOX1
chr1:125029857:125034401:clu_2474_-	Splicing event	PKNOX1
chr1:125029862:125034401:clu_2474_-	Splicing event	PKNOX1
chr1:125060724:125063863:clu_2476_-	Splicing event	NDUFV3
chr1:125060724:125067991:clu_2476_-	Splicing event	NDUFV3
chr1:125064825:125067991:clu_2476_-	Splicing event	NDUFV3
chr1:125068084:125068201:clu_2476_-	Splicing event	NDUFV3
chr1:125120456:125123833:clu_2479_-	Splicing event	PDE9A
chr1:125123903:125124720:clu_2479_-	Splicing event	PDE9A
chr1:125124774:125125712:clu_2480_-	Splicing event	PDE9A
chr1:125124774:125125906:clu_2480_-	Splicing event	PDE9A
chr1:125170566:125173666:clu_2482_-	Splicing event	SLC37A1
chr1:125170566:125178928:clu_2482_-	Splicing event	SLC37A1
chr1:125173749:125178928:clu_2482_-	Splicing event	SLC37A1
chr1:125179897:125181727:clu_2483_-	Splicing event	SLC37A1
chr1:125181803:125183309:clu_2483_-	Splicing event	SLC37A1
chr1:125183444:125184291:clu_2484_-	Splicing event	SLC37A1
chr1:125184369:125186269:clu_2484_-	Splicing event	SLC37A1
chr1:125189270:125192240:clu_2485_-	Splicing event	SLC37A1
chr1:125223581:125224267:clu_2489_-	Splicing event	UBASH3A
chr1:125224389:125225752:clu_2489_-	Splicing event	UBASH3A
chr1:125229017:125229886:clu_2491_-	Splicing event	UBASH3A
chr1:125230055:125231431:clu_2491_-	Splicing event	UBASH3A
chr1:125300473:125300936:clu_2493_-	Splicing event	ABCG1
chr1:125301036:125301795:clu_2493_-	Splicing event	ABCG1
chr1:125525577:125526332:clu_6459_+	Splicing event	C2CD2
chr1:125526445:125528532:clu_6459_+	Splicing event	C2CD2
chr1:125540648:125543512:clu_6457_+	Splicing event	PRDM15
chr1:125543008:125543512:clu_6457_+	Splicing event	PRDM15
chr1:125546724:125549340:clu_6458_+	Splicing event	PRDM15
chr1:125548844:125549340:clu_6458_+	Splicing event	PRDM15
chr1:125550607:125551792:clu_6461_+	Splicing event	PRDM15
chr1:125551914:125554539:clu_6461_+	Splicing event	PRDM15
chr1:125556424:125557515:clu_6462_+	Splicing event	PRDM15
chr1:125556424:125557518:clu_6462_+	Splicing event	PRDM15
chr1:125556424:125557572:clu_6462_+	Splicing event	PRDM15
chr1:125569795:125569912:clu_6466_+	Splicing event	PRDM15
chr1:125569795:125569915:clu_6466_+	Splicing event	PRDM15
chr1:125604184:125608555:clu_6473_+	Splicing event	RIPK4
chr1:125608846:125616156:clu_6473_+	Splicing event	RIPK4
chr1:12561704:12562745:clu_244_-	Splicing event	PHTF2
chr1:12563017:12564017:clu_244_-	Splicing event	PHTF2
chr1:125681277:125688337:clu_6474_+	Splicing event	TMPRSS2
chr1:12571594:12576027:clu_245_-	Splicing event	PHTF2
chr1:12571594:12576834:clu_245_-	Splicing event	PHTF2
chr1:12576191:12576834:clu_245_-	Splicing event	PHTF2
chr1:12576999:12581533:clu_245_-	Splicing event	PHTF2
chr1:12583022:12586794:clu_246_-	Splicing event	PHTF2
chr1:126019575:126019863:clu_6502_+	Splicing event	EIF1AX
chr1:126019932:126020519:clu_6502_+	Splicing event	EIF1AX
chr1:126098853:126101643:clu_6506_+	Splicing event	MAP7D2
chr1:12613628:12617171:clu_4036_+	Splicing event	TMEM60
chr1:126141144:126141425:clu_6510_+	Splicing event	BCLAF3
chr1:126141501:126141732:clu_6510_+	Splicing event	BCLAF3
chr1:126186996:126239543:clu_6486_+	Splicing event	SH3KBP1
chr1:126189897:126239543:clu_6486_+	Splicing event	SH3KBP1
chr1:12638294:12651489:clu_248_-	Splicing event	RSBN1L
chr1:12638294:12651872:clu_248_-	Splicing event	RSBN1L
chr1:126434379:126445460:clu_6514_+	Splicing event	MAP3K15
chr1:126447924:126448548:clu_6515_+	Splicing event	MAP3K15
chr1:126448698:126449114:clu_6515_+	Splicing event	MAP3K15
chr1:126487533:126488819:clu_2540_-	Splicing event	PDHA1
chr1:126487533:126490314:clu_2540_-	Splicing event	PDHA1
chr1:126488833:126490314:clu_2540_-	Splicing event	PDHA1
chr1:12651553:12651872:clu_248_-	Splicing event	RSBN1L
chr1:126635181:126635936:clu_6532_+	Splicing event	PHKA2
chr1:126649344:126650814:clu_6527_+	Splicing event	PHKA2
chr1:126653723:126655475:clu_6528_+	Splicing event	PHKA2
chr1:126653723:126657266:clu_6528_+	Splicing event	PHKA2
chr1:126655522:126657266:clu_6528_+	Splicing event	PHKA2
chr1:1267457:1268143:clu_42_-	Splicing event	ZC3HC1
chr1:126884320:126894767:clu_6536_+	Splicing event	SCML2
chr1:126894837:126900192:clu_6537_+	Splicing event	SCML2
chr1:126900426:126904524:clu_6538_+	Splicing event	SCML2
chr1:126906253:126919076:clu_6539_+	Splicing event	SCML2
chr1:126931540:126935692:clu_6540_+	Splicing event	SCML2
chr1:127087962:127088985:clu_2558_-	Splicing event	BEND2
chr1:127094552:127096255:clu_2562_-	Splicing event	BEND2
chr1:127096329:127096507:clu_2562_-	Splicing event	BEND2
chr1:127100910:127107198:clu_2561_-	Splicing event	BEND2
chr1:127442582:127444974:clu_2569_-	Splicing event	REPS2
chr1:127445057:127456573:clu_2569_-	Splicing event	REPS2
chr1:127470076:127472601:clu_2570_-	Splicing event	REPS2
chr1:127479593:127484210:clu_2571_-	Splicing event	REPS2
chr1:127496144:127497717:clu_2572_-	Splicing event	REPS2
chr1:127497865:127499626:clu_2572_-	Splicing event	REPS2
chr1:127558593:127559528:clu_6543_+	Splicing event	RBBP7
chr1:127558593:127560452:clu_6543_+	Splicing event	RBBP7
chr1:127559656:127560452:clu_6543_+	Splicing event	RBBP7
chr1:127620349:127623066:clu_6545_+	Splicing event	CTPS2
chr1:127620441:127623066:clu_6545_+	Splicing event	CTPS2
chr1:128021745:128022770:clu_6552_+	Splicing event	AP1S2
chr1:128030401:128031348:clu_6553_+	Splicing event	AP1S2
chr1:128031485:128040238:clu_6553_+	Splicing event	AP1S2
chr1:12804383:12805841:clu_252_-	Splicing event	LOC106015179
chr1:12806561:12809750:clu_4041_+	Splicing event	LOC101805113
chr1:128071397:128072250:clu_2588_-	Splicing event	ZRSR2
chr1:128071397:128072777:clu_2588_-	Splicing event	ZRSR2
chr1:12809823:12813928:clu_4042_+	Splicing event	LOC101805113
chr1:12813984:12814664:clu_4042_+	Splicing event	LOC101805113
chr1:12815392:12815792:clu_4043_+	Splicing event	LOC101805113
chr1:12815392:12816937:clu_4043_+	Splicing event	LOC101805113
chr1:12815861:12816937:clu_4043_+	Splicing event	LOC101805113
chr1:128242535:128246363:clu_6558_+	Splicing event	VEGFD
chr1:128246251:128246363:clu_6558_+	Splicing event	VEGFD
chr1:12829487:12829968:clu_4046_+	Splicing event	LOC101805113
chr1:12830060:12830978:clu_4046_+	Splicing event	LOC101805113
chr1:128307515:128316289:clu_6561_+	Splicing event	ASB9
chr1:12833082:12833733:clu_4044_+	Splicing event	LOC101805113
chr1:12833082:12837002:clu_4044_+	Splicing event	LOC101805113
chr1:12833917:12837002:clu_4044_+	Splicing event	LOC101805113
chr1:12834402:12837002:clu_4044_+	Splicing event	LOC101805113
chr1:12837127:12837538:clu_4045_+	Splicing event	LOC101805113
chr1:128504482:128504989:clu_2590_-	Splicing event	MOSPD2
chr1:128506346:128506978:clu_2591_-	Splicing event	MOSPD2
chr1:128507986:128511488:clu_2592_-	Splicing event	MOSPD2
chr1:128507986:128514422:clu_2592_-	Splicing event	MOSPD2
chr1:128511600:128514422:clu_2592_-	Splicing event	MOSPD2
chr1:128521983:128525340:clu_2595_-	Splicing event	MOSPD2
chr1:128525494:128527930:clu_2595_-	Splicing event	MOSPD2
chr1:128544598:128545481:clu_6565_+	Splicing event	FANCB
chr1:128955179:128955894:clu_6568_+	Splicing event	GEMIN8
chr1:128955945:128959519:clu_6568_+	Splicing event	GEMIN8
chr1:128959555:128962347:clu_6569_+	Splicing event	GEMIN8
chr1:128962773:128978255:clu_6569_+	Splicing event	GEMIN8
chr1:129103736:129104740:clu_2601_-	Splicing event	OFD1
chr1:129120178:129120357:clu_2603_-	Splicing event	OFD1
chr1:129120448:129121129:clu_2603_-	Splicing event	OFD1
chr1:129129660:129130339:clu_2605_-	Splicing event	OFD1
chr1:129130366:129130452:clu_2605_-	Splicing event	OFD1
chr1:129131601:129134173:clu_2607_-	Splicing event	OFD1
chr1:129134435:129134612:clu_6573_+	Splicing event	TRAPPC2
chr1:129134452:129134612:clu_6573_+	Splicing event	TRAPPC2
chr1:129144383:129151219:clu_2608_-	Splicing event	RAB9A
chr1:129147341:129150646:clu_2608_-	Splicing event	RAB9A
chr1:129147341:129151219:clu_2608_-	Splicing event	RAB9A
chr1:129159507:129167709:clu_2608_-	Splicing event	TCEANC
chr1:129167820:129171212:clu_2610_-	Splicing event	TCEANC
chr1:12949323:12954296:clu_4050_+	Splicing event	FAM185A
chr1:12954448:12966036:clu_4051_+	Splicing event	FAM185A
chr1:129615177:129615733:clu_2614_-	Splicing event	PRPS2
chr1:129618390:129621994:clu_2615_-	Splicing event	PRPS2
chr1:129622092:129628302:clu_2616_-	Splicing event	PRPS2
chr1:129622092:129628306:clu_2616_-	Splicing event	PRPS2
chr1:129625585:129628302:clu_2616_-	Splicing event	PRPS2
chr1:129628484:129640360:clu_2617_-	Splicing event	PRPS2
chr1:129628519:129640360:clu_2617_-	Splicing event	PRPS2
chr1:130139979:130140797:clu_2626_-	Splicing event	MSL3
chr1:130139979:130141698:clu_2626_-	Splicing event	MSL3
chr1:130140885:130141698:clu_2626_-	Splicing event	MSL3
chr1:130143141:130144451:clu_2627_-	Splicing event	MSL3
chr1:130173193:130175681:clu_2628_-	Splicing event	LOC113843203
chr1:130175594:130175681:clu_2628_-	Splicing event	LOC113843203
chr1:130175594:130175685:clu_2628_-	Splicing event	LOC113843203
chr1:130490105:130496326:clu_6593_+	Splicing event	ARHGAP6
chr1:130496588:130498882:clu_6594_+	Splicing event	ARHGAP6
chr1:130498962:130500059:clu_6594_+	Splicing event	ARHGAP6
chr1:13058914:13060087:clu_4053_+	Splicing event	ARMC10
chr1:130716870:130767640:clu_6597_+	Splicing event	MID1
chr1:130755438:130767640:clu_6597_+	Splicing event	MID1
chr1:130768355:130815975:clu_6598_+	Splicing event	MID1
chr1:130838617:130845759:clu_6599_+	Splicing event	MID1
chr1:130845902:130853729:clu_6599_+	Splicing event	MID1
chr1:131005343:131006359:clu_2634_-	Splicing event	WWC3
chr1:131005346:131006359:clu_2634_-	Splicing event	WWC3
chr1:13123104:13123456:clu_4058_+	Splicing event	PMPCB
chr1:13123104:13123459:clu_4058_+	Splicing event	PMPCB
chr1:131355236:131414304:clu_2640_-	Splicing event	TBL1X
chr1:131375123:131414304:clu_2640_-	Splicing event	TBL1X
chr1:13141640:13142199:clu_262_-	Splicing event	DNAJC2
chr1:13143217:13144095:clu_4056_+	Splicing event	PSMC2
chr1:13144228:13145068:clu_4056_+	Splicing event	PSMC2
chr1:13159680:13160019:clu_266_-	Splicing event	SLC26A5
chr1:13160046:13160379:clu_266_-	Splicing event	SLC26A5
chr1:13162011:13164577:clu_267_-	Splicing event	SLC26A5
chr1:13164668:13165562:clu_268_-	Splicing event	SLC26A5
chr1:13186239:13189031:clu_271_-	Splicing event	SLC26A5
chr1:13212510:13213052:clu_272_-	Splicing event	RELN
chr1:132353500:132354324:clu_6614_+	Splicing event	PNPLA4
chr1:132354450:132358406:clu_6614_+	Splicing event	PNPLA4
chr1:132354450:132359644:clu_6614_+	Splicing event	PNPLA4
chr1:132354450:132359677:clu_6614_+	Splicing event	PNPLA4
chr1:132358468:132359644:clu_6614_+	Splicing event	PNPLA4
chr1:132359828:132364318:clu_6614_+	Splicing event	PNPLA4
chr1:132364412:132364592:clu_6614_+	Splicing event	PNPLA4
chr1:132371868:132375811:clu_6616_+	Splicing event	PNPLA4
chr1:13245297:13246766:clu_275_-	Splicing event	RELN
chr1:13246943:13247039:clu_275_-	Splicing event	RELN
chr1:132659489:132684622:clu_2652_-	Splicing event	STS
chr1:132679469:132684622:clu_2652_-	Splicing event	STS
chr1:132684705:132691682:clu_2653_-	Splicing event	STS
chr1:132684758:132691682:clu_2653_-	Splicing event	STS
chr1:132696336:132698885:clu_2654_-	Splicing event	STS
chr1:132696336:132701894:clu_2654_-	Splicing event	STS
chr1:132699006:132701894:clu_2654_-	Splicing event	STS
chr1:132702046:132714206:clu_2655_-	Splicing event	STS
chr1:132702046:132715565:clu_2655_-	Splicing event	STS
chr1:132714492:132715565:clu_2655_-	Splicing event	STS
chr1:132715663:132725361:clu_2655_-	Splicing event	STS
chr1:132753561:132763761:clu_6618_+	Splicing event	LOC101800629
chr1:13290159:13292986:clu_278_-	Splicing event	RELN
chr1:13293095:13294225:clu_278_-	Splicing event	RELN
chr1:134771829:134777798:clu_6627_+	Splicing event	PRKX
chr1:134777893:134782164:clu_6627_+	Splicing event	PRKX
chr1:134969955:134971502:clu_6628_+	Splicing event	MXRA5
chr1:135116062:135116521:clu_6634_+	Splicing event	LOC113840609
chr1:135116661:135117506:clu_6634_+	Splicing event	LOC113840609
chr1:135203596:135205325:clu_2667_-	Splicing event	GYG2
chr1:135203610:135205325:clu_2667_-	Splicing event	GYG2
chr1:135208739:135209030:clu_2669_-	Splicing event	GYG2
chr1:135212083:135215378:clu_2671_-	Splicing event	GYG2
chr1:135212083:135217112:clu_2671_-	Splicing event	GYG2
chr1:135215498:135217112:clu_2671_-	Splicing event	GYG2
chr1:135248515:135250446:clu_2664_-	Splicing event	CD99
chr1:135250535:135251375:clu_2665_-	Splicing event	CD99
chr1:135250538:135251375:clu_2665_-	Splicing event	CD99
chr1:135473700:135489592:clu_6649_+	Splicing event	DHRSX
chr1:135522521:135535473:clu_6650_+	Splicing event	DHRSX
chr1:135763581:135763934:clu_2678_-	Splicing event	LOC101796277
chr1:135764078:135764189:clu_2678_-	Splicing event	LOC101796277
chr1:13577177:13578414:clu_286_-	Splicing event	ORC5
chr1:13577177:13578533:clu_286_-	Splicing event	ORC5
chr1:13577177:13578693:clu_286_-	Splicing event	ORC5
chr1:13577177:13579000:clu_286_-	Splicing event	ORC5
chr1:13578593:13578693:clu_286_-	Splicing event	ORC5
chr1:13578819:13578984:clu_286_-	Splicing event	ORC5
chr1:13578819:13579000:clu_286_-	Splicing event	ORC5
chr1:13579100:13579211:clu_286_-	Splicing event	ORC5
chr1:135875580:135875936:clu_6653_+	Splicing event	LOC101799034
chr1:135883385:135883988:clu_2689_-	Splicing event	LOC119715550
chr1:135884117:135884551:clu_2689_-	Splicing event	LOC119715550
chr1:1358979:1359095:clu_54_-	Splicing event	COPG2
chr1:135913042:135916135:clu_2692_-	Splicing event	LOC101794111
chr1:135938933:135940877:clu_2693_-	Splicing event	LOC101793812
chr1:135938933:135941152:clu_2693_-	Splicing event	LOC101793812
chr1:135941052:135941152:clu_2693_-	Splicing event	LOC101793812
chr1:135941281:135942391:clu_2692_-	Splicing event	LOC101793812
chr1:135942517:135944526:clu_2692_-	Splicing event	LOC101793812
chr1:135944659:135944840:clu_2694_-	Splicing event	LOC101793812
chr1:135944933:135946802:clu_2694_-	Splicing event	LOC101793812
chr1:135958516:135960168:clu_2695_-	Splicing event	LOC101793135
chr1:135960307:135962880:clu_2695_-	Splicing event	LOC101793135
chr1:135960307:135963142:clu_2695_-	Splicing event	LOC101793135
chr1:135963049:135963142:clu_2695_-	Splicing event	LOC101793135
chr1:135963271:135967431:clu_2695_-	Splicing event	LOC101793135
chr1:136800875:136801293:clu_6664_+	Splicing event	PPP2R3B
chr1:136801449:136803539:clu_6664_+	Splicing event	PPP2R3B
chr1:136828037:136828770:clu_2709_-	Splicing event	LOC101794805
chr1:136828862:136830770:clu_2709_-	Splicing event	LOC101794805
chr1:136838315:136840224:clu_2710_-	Splicing event	LOC101794805
chr1:136840331:136848738:clu_2710_-	Splicing event	LOC101794805
chr1:136840331:136850982:clu_2710_-	Splicing event	LOC101794805
chr1:136848817:136850982:clu_2710_-	Splicing event	LOC101794805
chr1:136851080:136856843:clu_2710_-	Splicing event	LOC101794805
chr1:136878920:136879351:clu_6668_+	Splicing event	GTPBP6
chr1:136878920:136880999:clu_6668_+	Splicing event	GTPBP6
chr1:136879421:136880999:clu_6668_+	Splicing event	GTPBP6
chr1:136881129:136881837:clu_6668_+	Splicing event	GTPBP6
chr1:136881907:136882353:clu_6668_+	Splicing event	GTPBP6
chr1:136884032:136886471:clu_6670_+	Splicing event	GTPBP6
chr1:136884181:136886471:clu_6670_+	Splicing event	GTPBP6
chr1:136903836:136904172:clu_2719_-	Splicing event	PLCXD1
chr1:136903836:136904462:clu_2719_-	Splicing event	PLCXD1
chr1:136936353:136939801:clu_2713_-	Splicing event	LOC101796441
chr1:136941315:136942492:clu_2714_-	Splicing event	LOC101796441
chr1:136941394:136942492:clu_2714_-	Splicing event	LOC101796441
chr1:136942674:136943238:clu_2715_-	Splicing event	LOC101796441
chr1:136943471:136943702:clu_2716_-	Splicing event	LOC101796441
chr1:136943471:136944068:clu_2716_-	Splicing event	LOC101796441
chr1:136944:138075:clu_3799_+	Splicing event	GOLGB1
chr1:136957002:136962425:clu_2725_-	Splicing event	JADE3
chr1:136968362:136978168:clu_2726_-	Splicing event	JADE3
chr1:136979364:136989584:clu_2726_-	Splicing event	JADE3
chr1:137080316:137086053:clu_6672_+	Splicing event	SLC9A7
chr1:137080316:137089814:clu_6672_+	Splicing event	SLC9A7
chr1:137080316:137092473:clu_6672_+	Splicing event	SLC9A7
chr1:137153309:137153386:clu_6681_+	Splicing event	TUBGCP5
chr1:137153494:137154505:clu_6681_+	Splicing event	TUBGCP5
chr1:137154601:137155206:clu_6682_+	Splicing event	TUBGCP5
chr1:137154601:137155868:clu_6682_+	Splicing event	TUBGCP5
chr1:137155316:137155868:clu_6682_+	Splicing event	TUBGCP5
chr1:137155947:137156999:clu_6683_+	Splicing event	TUBGCP5
chr1:137157134:137158166:clu_6683_+	Splicing event	TUBGCP5
chr1:137159766:137160313:clu_6684_+	Splicing event	TUBGCP5
chr1:137160406:137160709:clu_6684_+	Splicing event	TUBGCP5
chr1:137169414:137169535:clu_6688_+	Splicing event	TUBGCP5
chr1:137169655:137170649:clu_6688_+	Splicing event	TUBGCP5
chr1:137170827:137171668:clu_6688_+	Splicing event	TUBGCP5
chr1:137206096:137207513:clu_6673_+	Splicing event	CYFIP1
chr1:137206096:137207975:clu_6673_+	Splicing event	CYFIP1
chr1:137207660:137209332:clu_6674_+	Splicing event	CYFIP1
chr1:137208128:137209332:clu_6674_+	Splicing event	CYFIP1
chr1:137252176:137252801:clu_2721_-	Splicing event	NIPA2
chr1:137252176:137257312:clu_2721_-	Splicing event	NIPA2
chr1:137252176:137257567:clu_2721_-	Splicing event	NIPA2
chr1:137335558:137336362:clu_6689_+	Splicing event	HERC2
chr1:137335573:137336362:clu_6689_+	Splicing event	HERC2
chr1:137360154:137360437:clu_6697_+	Splicing event	HERC2
chr1:137360215:137360437:clu_6697_+	Splicing event	HERC2
chr1:137385743:137387004:clu_6675_+	Splicing event	HERC2
chr1:137385743:137388194:clu_6675_+	Splicing event	HERC2
chr1:137387111:137388194:clu_6675_+	Splicing event	HERC2
chr1:1377415:1378746:clu_60_-	Splicing event	COPG2
chr1:138206:139771:clu_3799_+	Splicing event	GOLGB1
chr1:138625058:138630661:clu_6716_+	Splicing event	ATP10A
chr1:138769996:138773195:clu_6712_+	Splicing event	UBE3A
chr1:138769996:138777083:clu_6712_+	Splicing event	UBE3A
chr1:138773284:138777083:clu_6712_+	Splicing event	UBE3A
chr1:138783674:138784276:clu_6713_+	Splicing event	UBE3A
chr1:138784395:138784818:clu_6714_+	Splicing event	UBE3A
chr1:138784883:138787710:clu_6714_+	Splicing event	UBE3A
chr1:138785108:138787710:clu_6714_+	Splicing event	UBE3A
chr1:138893679:138894827:clu_2743_-	Splicing event	VWA3B
chr1:139123844:139127971:clu_2751_-	Splicing event	INPP4A
chr1:139128003:139131188:clu_2751_-	Splicing event	INPP4A
chr1:139128003:139131347:clu_2751_-	Splicing event	INPP4A
chr1:139135943:139138547:clu_2753_-	Splicing event	INPP4A
chr1:139135943:139142010:clu_2753_-	Splicing event	INPP4A
chr1:139138561:139142010:clu_2753_-	Splicing event	INPP4A
chr1:139138564:139142010:clu_2753_-	Splicing event	INPP4A
chr1:139148343:139150846:clu_2754_-	Splicing event	INPP4A
chr1:139148385:139150846:clu_2754_-	Splicing event	INPP4A
chr1:139157009:139188921:clu_2758_-	Splicing event	INPP4A
chr1:13919609:13920679:clu_289_-	Splicing event	LOC106018873
chr1:13920819:13943232:clu_289_-	Splicing event	LOC106018873
chr1:139220844:139222464:clu_2759_-	Splicing event	LOC101803290
chr1:139222558:139222920:clu_2759_-	Splicing event	LOC101803290
chr1:139223371:139223707:clu_6732_+	Splicing event	UNC50
chr1:139223376:139223707:clu_6732_+	Splicing event	UNC50
chr1:139223475:139223707:clu_6732_+	Splicing event	UNC50
chr1:139275598:139298761:clu_2762_-	Splicing event	MGAT4A
chr1:139401915:139402158:clu_6736_+	Splicing event	LIPT1
chr1:139401920:139402158:clu_6736_+	Splicing event	LIPT1
chr1:139408258:139408346:clu_2774_-	Splicing event	MITD1
chr1:139408406:139408733:clu_2774_-	Splicing event	MITD1
chr1:139410546:139410798:clu_6734_+	Splicing event	MRPL30
chr1:139447415:139449776:clu_2780_-	Splicing event	TXNDC9
chr1:139449894:139452010:clu_2780_-	Splicing event	TXNDC9
chr1:13945072:13952790:clu_4063_+	Splicing event	KMT2E
chr1:13945072:13963006:clu_4063_+	Splicing event	KMT2E
chr1:139453488:139453846:clu_2781_-	Splicing event	TXNDC9
chr1:139453488:139453899:clu_2781_-	Splicing event	TXNDC9
chr1:139471629:139472998:clu_6737_+	Splicing event	EIF5B
chr1:139491574:139491738:clu_2782_-	Splicing event	REV1
chr1:139502745:139503799:clu_2786_-	Splicing event	REV1
chr1:139509131:139509859:clu_2788_-	Splicing event	REV1
chr1:139509179:139509859:clu_2788_-	Splicing event	REV1
chr1:139511144:139512631:clu_2785_-	Splicing event	REV1
chr1:139511144:139515623:clu_2785_-	Splicing event	REV1
chr1:139511147:139515623:clu_2785_-	Splicing event	REV1
chr1:139512972:139515623:clu_2785_-	Splicing event	REV1
chr1:139519491:139521908:clu_2790_-	Splicing event	REV1
chr1:139522057:139527211:clu_2790_-	Splicing event	REV1
chr1:13952849:13963006:clu_4063_+	Splicing event	KMT2E
chr1:139530003:139531554:clu_2792_-	Splicing event	REV1
chr1:139531662:139543075:clu_2792_-	Splicing event	REV1
chr1:13981432:13982169:clu_4065_+	Splicing event	KMT2E
chr1:13982293:13982811:clu_4065_+	Splicing event	KMT2E
chr1:139929:140058:clu_3800_+	Splicing event	GOLGB1
chr1:140024076:140026047:clu_2801_-	Splicing event	LONRF2
chr1:140026209:140028803:clu_2801_-	Splicing event	LONRF2
chr1:14006892:14006992:clu_4070_+	Splicing event	KMT2E
chr1:14006892:14007266:clu_4070_+	Splicing event	KMT2E
chr1:14007111:14007266:clu_4070_+	Splicing event	KMT2E
chr1:14007357:14011061:clu_4066_+	Splicing event	KMT2E
chr1:1400795:1404741:clu_3852_+	Splicing event	IL15RA
chr1:140081470:140084183:clu_2804_-	Splicing event	CHST10
chr1:140084280:140086910:clu_2804_-	Splicing event	CHST10
chr1:14009775:14011061:clu_4066_+	Splicing event	KMT2E
chr1:14011163:14011744:clu_4071_+	Splicing event	KMT2E
chr1:14013842:14017055:clu_290_-	Splicing event	SRPK2
chr1:140152:140811:clu_3800_+	Splicing event	GOLGB1
chr1:140291778:140296513:clu_6747_+	Splicing event	NPAS2
chr1:140296661:140299902:clu_6748_+	Splicing event	NPAS2
chr1:140309442:140310426:clu_6750_+	Splicing event	NPAS2
chr1:140310539:140319111:clu_6750_+	Splicing event	NPAS2
chr1:140325094:140325270:clu_6753_+	Splicing event	NPAS2
chr1:140325094:140325288:clu_6753_+	Splicing event	NPAS2
chr1:140325362:140330628:clu_6753_+	Splicing event	NPAS2
chr1:140336938:140337795:clu_6754_+	Splicing event	NPAS2
chr1:140337967:140338724:clu_6754_+	Splicing event	NPAS2
chr1:140427823:140430071:clu_6756_+	Splicing event	CNOT11
chr1:140438008:140440122:clu_2809_-	Splicing event	RNF149
chr1:140438008:140440683:clu_2809_-	Splicing event	RNF149
chr1:140440151:140440683:clu_2809_-	Splicing event	RNF149
chr1:140440779:140441263:clu_2809_-	Splicing event	RNF149
chr1:140441345:140444203:clu_2809_-	Splicing event	RNF149
chr1:140444271:140446638:clu_2809_-	Splicing event	RNF149
chr1:1404929:1405042:clu_3853_+	Splicing event	IL15RA
chr1:1405119:1405302:clu_3853_+	Splicing event	IL15RA
chr1:1405493:1405691:clu_3853_+	Splicing event	IL15RA
chr1:14056462:14103122:clu_291_-	Splicing event	SRPK2
chr1:14056462:14153173:clu_291_-	Splicing event	SRPK2
chr1:1406069:1406174:clu_3854_+	Splicing event	IL15RA
chr1:140646993:140649120:clu_6758_+	Splicing event	MAP4K4
chr1:140646993:140649876:clu_6758_+	Splicing event	MAP4K4
chr1:140649206:140649876:clu_6758_+	Splicing event	MAP4K4
chr1:1406526:1406902:clu_3854_+	Splicing event	IL15RA
chr1:140653571:140655587:clu_6759_+	Splicing event	MAP4K4
chr1:140653571:140656730:clu_6759_+	Splicing event	MAP4K4
chr1:140655817:140656730:clu_6759_+	Splicing event	MAP4K4
chr1:140660927:140662118:clu_6761_+	Splicing event	MAP4K4
chr1:140660927:140664690:clu_6761_+	Splicing event	MAP4K4
chr1:140662309:140664690:clu_6761_+	Splicing event	MAP4K4
chr1:140664807:140665081:clu_6762_+	Splicing event	MAP4K4
chr1:140763333:140764114:clu_6768_+	Splicing event	LOC101794055
chr1:140763689:140764114:clu_6768_+	Splicing event	LOC101794055
chr1:140763693:140764114:clu_6768_+	Splicing event	LOC101794055
chr1:140763879:140764114:clu_6768_+	Splicing event	LOC101794055
chr1:140768322:140769062:clu_6769_+	Splicing event	LOC101794055
chr1:140774515:140776808:clu_6770_+	Splicing event	LOC101794055
chr1:140776887:140777002:clu_6770_+	Splicing event	LOC101794055
chr1:140824981:140826705:clu_6775_+	Splicing event	IL1RL1
chr1:140826849:140829902:clu_6775_+	Splicing event	IL1RL1
chr1:140829972:140831958:clu_6775_+	Splicing event	IL1RL1
chr1:140832159:140832465:clu_6776_+	Splicing event	IL1RL1
chr1:140832633:140832721:clu_6776_+	Splicing event	IL1RL1
chr1:140837757:140844544:clu_6779_+	Splicing event	IL1RL1
chr1:140844687:140845368:clu_6779_+	Splicing event	IL1RL1
chr1:140845526:140848749:clu_6779_+	Splicing event	IL1RL1
chr1:140854804:140855417:clu_6782_+	Splicing event	IL18R1
chr1:140857219:140858211:clu_6783_+	Splicing event	IL18R1
chr1:140858281:140859342:clu_6783_+	Splicing event	IL18R1
chr1:140859579:140860020:clu_6784_+	Splicing event	IL18R1
chr1:140859579:140866284:clu_6784_+	Splicing event	IL18R1
chr1:140870888:140871065:clu_6785_+	Splicing event	IL18R1
chr1:140874229:140875735:clu_6786_+	Splicing event	IL18R1
chr1:141001980:141003280:clu_2821_-	Splicing event	MFSD9
chr1:141003323:141004678:clu_2821_-	Splicing event	MFSD9
chr1:14175475:14176442:clu_4073_+	Splicing event	PUS7
chr1:14175575:14176442:clu_4073_+	Splicing event	PUS7
chr1:14176520:14177196:clu_4074_+	Splicing event	PUS7
chr1:14176520:14179461:clu_4074_+	Splicing event	PUS7
chr1:14177589:14179461:clu_4074_+	Splicing event	PUS7
chr1:14179545:14179678:clu_4075_+	Splicing event	PUS7
chr1:14179557:14179678:clu_4075_+	Splicing event	PUS7
chr1:14179563:14179678:clu_4075_+	Splicing event	PUS7
chr1:14189424:14190338:clu_4078_+	Splicing event	PUS7
chr1:142131606:142137759:clu_2826_-	Splicing event	TGFBRAP1
chr1:142131625:142137759:clu_2826_-	Splicing event	TGFBRAP1
chr1:142137841:142144148:clu_2826_-	Splicing event	TGFBRAP1
chr1:14216530:14220552:clu_296_-	Splicing event	ATXN7L1
chr1:14217058:14220552:clu_296_-	Splicing event	ATXN7L1
chr1:14217487:14220552:clu_296_-	Splicing event	ATXN7L1
chr1:142181839:142193224:clu_2829_-	Splicing event	FHL2
chr1:142181844:142193224:clu_2829_-	Splicing event	FHL2
chr1:14220626:14224641:clu_296_-	Splicing event	ATXN7L1
chr1:14225595:14228823:clu_297_-	Splicing event	ATXN7L1
chr1:14228944:14230136:clu_297_-	Splicing event	ATXN7L1
chr1:142307248:142337772:clu_6804_+	Splicing event	NCK2
chr1:142337843:142360610:clu_6804_+	Splicing event	NCK2
chr1:14247263:14252866:clu_292_-	Splicing event	ATXN7L1
chr1:14247263:14253295:clu_292_-	Splicing event	ATXN7L1
chr1:14247263:14262627:clu_292_-	Splicing event	ATXN7L1
chr1:14247263:14289172:clu_292_-	Splicing event	ATXN7L1
chr1:142486309:142498577:clu_2833_-	Splicing event	UXS1
chr1:142486407:142498577:clu_2833_-	Splicing event	UXS1
chr1:142486466:142498577:clu_2833_-	Splicing event	UXS1
chr1:142506870:142518167:clu_2834_-	Splicing event	UXS1
chr1:14252955:14253295:clu_292_-	Splicing event	ATXN7L1
chr1:14289276:14327987:clu_292_-	Splicing event	ATXN7L1
chr1:143356755:143357294:clu_6826_+	Splicing event	LOC101796526
chr1:143357384:143358262:clu_6826_+	Splicing event	LOC101796526
chr1:143375399:143375841:clu_6827_+	Splicing event	LOC119715593
chr1:143779933:143782626:clu_2845_-	Splicing event	SEPTIN10
chr1:143779933:143790808:clu_2845_-	Splicing event	SEPTIN10
chr1:143782758:143790808:clu_2845_-	Splicing event	SEPTIN10
chr1:143797246:143797657:clu_2846_-	Splicing event	SEPTIN10
chr1:143797246:143797663:clu_2846_-	Splicing event	SEPTIN10
chr1:143797246:143798798:clu_2846_-	Splicing event	SEPTIN10
chr1:143797718:143798798:clu_2846_-	Splicing event	SEPTIN10
chr1:143798993:143799450:clu_2847_-	Splicing event	SEPTIN10
chr1:143799044:143799450:clu_2847_-	Splicing event	SEPTIN10
chr1:143799567:143803905:clu_2848_-	Splicing event	SEPTIN10
chr1:143799567:143805821:clu_2848_-	Splicing event	SEPTIN10
chr1:143875168:143876915:clu_2855_-	Splicing event	UPF3A
chr1:143896234:143897357:clu_2859_-	Splicing event	CDC16
chr1:143908832:143910243:clu_2863_-	Splicing event	CDC16
chr1:143912014:143912811:clu_2864_-	Splicing event	CDC16
chr1:143952224:143979129:clu_6834_+	Splicing event	RASA3
chr1:143979246:143988860:clu_6835_+	Splicing event	RASA3
chr1:143988963:144000167:clu_6835_+	Splicing event	RASA3
chr1:144038879:144039783:clu_6837_+	Splicing event	RASA3
chr1:144039857:144040404:clu_6837_+	Splicing event	RASA3
chr1:144115392:144116402:clu_6841_+	Splicing event	GAS6
chr1:144117371:144117830:clu_6842_+	Splicing event	GAS6
chr1:144137631:144142498:clu_2867_-	Splicing event	TMEM255B
chr1:144236443:144237484:clu_2872_-	Splicing event	TFDP1
chr1:144241177:144241374:clu_2858_-	Splicing event	TFDP1
chr1:144241180:144241374:clu_2858_-	Splicing event	TFDP1
chr1:144282021:144287365:clu_2875_-	Splicing event	TMCO3
chr1:144287515:144293812:clu_2875_-	Splicing event	TMCO3
chr1:144309229:144310944:clu_6844_+	Splicing event	DCUN1D2
chr1:144311160:144313958:clu_6844_+	Splicing event	DCUN1D2
chr1:144316772:144322933:clu_6846_+	Splicing event	DCUN1D2
chr1:144316772:144329084:clu_6846_+	Splicing event	DCUN1D2
chr1:144323029:144329084:clu_6846_+	Splicing event	DCUN1D2
chr1:144388437:144393873:clu_6852_+	Splicing event	GRTP1
chr1:144394031:144400789:clu_6852_+	Splicing event	GRTP1
chr1:14444120:14446899:clu_303_-	Splicing event	NAMPT
chr1:144452046:144453450:clu_2886_-	Splicing event	LOC101797069
chr1:144453642:144456102:clu_2886_-	Splicing event	LOC101797069
chr1:14446916:14449780:clu_303_-	Splicing event	NAMPT
chr1:144477821:144478437:clu_6859_+	Splicing event	LOC101795284
chr1:144480398:144481746:clu_6860_+	Splicing event	LOC101795284
chr1:144482682:144482803:clu_6861_+	Splicing event	LOC101795284
chr1:144482944:144483345:clu_6862_+	Splicing event	LOC101795284
chr1:144485178:144485351:clu_6863_+	Splicing event	LOC101795284
chr1:144485476:144485696:clu_6858_+	Splicing event	LOC101795284
chr1:144488801:144489336:clu_2888_-	Splicing event	LOC101795465
chr1:144489459:144489551:clu_2889_-	Splicing event	LOC101795465
chr1:144489636:144490598:clu_2889_-	Splicing event	LOC101795465
chr1:144513810:144514617:clu_2882_-	Splicing event	LOC119716512
chr1:144519687:144519929:clu_2891_-	Splicing event	LOC119716522
chr1:144524331:144525675:clu_6860_+	Splicing event	LOC119715605
chr1:144526604:144526726:clu_6861_+	Splicing event	LOC119715605
chr1:144526867:144527268:clu_6862_+	Splicing event	LOC119715605
chr1:144529073:144529246:clu_6863_+	Splicing event	LOC119715605
chr1:144529371:144529601:clu_6858_+	Splicing event	LOC119715605
chr1:144557784:144558592:clu_2882_-	Splicing event	LOC101795784
chr1:144559765:144562398:clu_2883_-	Splicing event	LOC101795784
chr1:144585432:144588563:clu_2895_-	Splicing event	MCF2L
chr1:144585432:144588986:clu_2895_-	Splicing event	MCF2L
chr1:144588637:144588986:clu_2895_-	Splicing event	MCF2L
chr1:144747487:144749376:clu_2898_-	Splicing event	ATP11A
chr1:144747487:144749387:clu_2898_-	Splicing event	ATP11A
chr1:144747487:144753933:clu_2898_-	Splicing event	ATP11A
chr1:144749491:144753933:clu_2898_-	Splicing event	ATP11A
chr1:144754098:144755886:clu_2899_-	Splicing event	ATP11A
chr1:144755989:144756258:clu_2899_-	Splicing event	ATP11A
chr1:144761058:144762849:clu_2900_-	Splicing event	ATP11A
chr1:144762976:144763644:clu_2900_-	Splicing event	ATP11A
chr1:144917460:144920471:clu_6866_+	Splicing event	TUBGCP3
chr1:144920589:144924038:clu_6866_+	Splicing event	TUBGCP3
chr1:144935770:144940250:clu_6869_+	Splicing event	TUBGCP3
chr1:144935773:144940250:clu_6869_+	Splicing event	TUBGCP3
chr1:145633213:145657650:clu_2904_-	Splicing event	IRS2
chr1:145656310:145657650:clu_2904_-	Splicing event	IRS2
chr1:146077775:146097647:clu_2905_-	Splicing event	RAB20
chr1:146130562:146136697:clu_6881_+	Splicing event	NAXD
chr1:146133239:146136697:clu_6881_+	Splicing event	NAXD
chr1:146133343:146136697:clu_6881_+	Splicing event	NAXD
chr1:146136847:146139944:clu_6882_+	Splicing event	NAXD
chr1:146140032:146164645:clu_6883_+	Splicing event	NAXD
chr1:146165374:146168478:clu_6884_+	Splicing event	NAXD
chr1:146165536:146175177:clu_6884_+	Splicing event	NAXD
chr1:146168597:146175177:clu_6884_+	Splicing event	NAXD
chr1:146185259:146186924:clu_2914_-	Splicing event	CARS2
chr1:146189218:146192795:clu_2910_-	Splicing event	CARS2
chr1:146259885:146262762:clu_2906_-	Splicing event	ANKRD10
chr1:146259903:146262762:clu_2906_-	Splicing event	ANKRD10
chr1:146266499:146272896:clu_2908_-	Splicing event	ANKRD10
chr1:146266499:146278501:clu_2908_-	Splicing event	ANKRD10
chr1:146266499:146281202:clu_2908_-	Splicing event	ANKRD10
chr1:146273027:146281202:clu_2908_-	Splicing event	ANKRD10
chr1:146278626:146281202:clu_2908_-	Splicing event	ANKRD10
chr1:146281293:146285736:clu_2909_-	Splicing event	ANKRD10
chr1:146281293:146288607:clu_2909_-	Splicing event	ANKRD10
chr1:146342292:146369558:clu_6891_+	Splicing event	ARHGEF7
chr1:146369642:146373043:clu_6891_+	Splicing event	ARHGEF7
chr1:146395857:146405764:clu_6893_+	Splicing event	ARHGEF7
chr1:146405902:146406795:clu_6893_+	Splicing event	ARHGEF7
chr1:14686852:14714920:clu_4095_+	Splicing event	PRKAR2B
chr1:14703811:14714920:clu_4095_+	Splicing event	PRKAR2B
chr1:147152815:147153498:clu_2919_-	Splicing event	ABHD13
chr1:147153602:147159922:clu_2921_-	Splicing event	ABHD13
chr1:147158465:147159922:clu_2921_-	Splicing event	ABHD13
chr1:1477250:1477355:clu_85_-	Splicing event	TASOR2
chr1:14775863:14779374:clu_4096_+	Splicing event	HBP1
chr1:148070933:148072768:clu_6901_+	Splicing event	ARGLU1
chr1:148072825:148073260:clu_6901_+	Splicing event	ARGLU1
chr1:1482158:1483875:clu_86_-	Splicing event	TASOR2
chr1:1484074:1489039:clu_86_-	Splicing event	TASOR2
chr1:14975179:14977254:clu_4098_+	Splicing event	DUS4L
chr1:14975179:14979738:clu_4098_+	Splicing event	DUS4L
chr1:150032843:150033644:clu_2932_-	Splicing event	LOC101799732
chr1:150041949:150042607:clu_2935_-	Splicing event	LOC101799732
chr1:150041952:150042607:clu_2935_-	Splicing event	LOC101799732
chr1:150044115:150045210:clu_2937_-	Splicing event	LOC101799732
chr1:150044135:150045210:clu_2937_-	Splicing event	LOC101799732
chr1:150050552:150051419:clu_2940_-	Splicing event	BIVM
chr1:150050552:150053882:clu_2940_-	Splicing event	BIVM
chr1:150051490:150053882:clu_2940_-	Splicing event	BIVM
chr1:150060585:150060908:clu_2942_-	Splicing event	BIVM
chr1:150060585:150061047:clu_2942_-	Splicing event	BIVM
chr1:150060585:150061214:clu_2942_-	Splicing event	BIVM
chr1:150065308:150066868:clu_6910_+	Splicing event	POGLUT2
chr1:150065308:150066902:clu_6910_+	Splicing event	POGLUT2
chr1:150078659:150080116:clu_2943_-	Splicing event	TEX30
chr1:150080167:150081613:clu_2943_-	Splicing event	TEX30
chr1:150081843:150083709:clu_2944_-	Splicing event	TEX30
chr1:150122840:150129065:clu_2945_-	Splicing event	TPP2
chr1:150129272:150130554:clu_2946_-	Splicing event	TPP2
chr1:150131987:150137369:clu_2947_-	Splicing event	TPP2
chr1:150137407:150139248:clu_2947_-	Splicing event	TPP2
chr1:150151967:150153546:clu_2949_-	Splicing event	TPP2
chr1:150153661:150153806:clu_2949_-	Splicing event	TPP2
chr1:15048659:15049016:clu_4108_+	Splicing event	CBLL1
chr1:151225582:151229151:clu_6923_+	Splicing event	TMTC4
chr1:151229238:151240239:clu_6923_+	Splicing event	TMTC4
chr1:151240336:151242425:clu_6923_+	Splicing event	TMTC4
chr1:151242517:151245687:clu_6923_+	Splicing event	TMTC4
chr1:151245848:151246623:clu_6923_+	Splicing event	TMTC4
chr1:151256010:151256184:clu_6926_+	Splicing event	TMTC4
chr1:151256291:151256412:clu_6926_+	Splicing event	TMTC4
chr1:151257319:151257801:clu_6927_+	Splicing event	TMTC4
chr1:151257913:151263433:clu_6927_+	Splicing event	TMTC4
chr1:151269241:151289699:clu_6928_+	Splicing event	GGACT
chr1:151269241:151296941:clu_6928_+	Splicing event	GGACT
chr1:151269241:151297406:clu_6928_+	Splicing event	GGACT
chr1:151289736:151296941:clu_6928_+	Splicing event	GGACT
chr1:151289736:151297406:clu_6928_+	Splicing event	GGACT
chr1:151296996:151297406:clu_6928_+	Splicing event	GGACT
chr1:152002315:152037664:clu_6934_+	Splicing event	DOCK9
chr1:152099405:152101239:clu_6942_+	Splicing event	DOCK9
chr1:152101375:152106700:clu_6942_+	Splicing event	DOCK9
chr1:152101945:152106700:clu_6942_+	Splicing event	DOCK9
chr1:152119342:152120872:clu_6944_+	Splicing event	DOCK9
chr1:152121018:152122326:clu_6944_+	Splicing event	DOCK9
chr1:152186322:152208149:clu_6948_+	Splicing event	STK24
chr1:152262049:152275900:clu_2950_-	Splicing event	FARP1
chr1:152262052:152275900:clu_2950_-	Splicing event	FARP1
chr1:152276140:152277922:clu_2951_-	Splicing event	FARP1
chr1:15256737:15261735:clu_4101_+	Splicing event	ERGIC2
chr1:15259806:15261735:clu_4101_+	Splicing event	ERGIC2
chr1:15260880:15261735:clu_4101_+	Splicing event	ERGIC2
chr1:152642046:152656916:clu_2952_-	Splicing event	MBNL2
chr1:152642046:152661690:clu_2952_-	Splicing event	MBNL2
chr1:152657010:152661690:clu_2952_-	Splicing event	MBNL2
chr1:152661843:152662508:clu_2953_-	Splicing event	MBNL2
chr1:152661843:152668766:clu_2953_-	Splicing event	MBNL2
chr1:152662561:152668766:clu_2953_-	Splicing event	MBNL2
chr1:15307738:15309932:clu_325_-	Splicing event	LRRK2
chr1:15310150:15311357:clu_325_-	Splicing event	LRRK2
chr1:15311484:15312541:clu_326_-	Splicing event	LRRK2
chr1:15312770:15313094:clu_326_-	Splicing event	LRRK2
chr1:15320053:15320561:clu_327_-	Splicing event	LRRK2
chr1:15320781:15321241:clu_327_-	Splicing event	LRRK2
chr1:153315967:153319896:clu_6960_+	Splicing event	DZIP1
chr1:153330540:153340346:clu_6964_+	Splicing event	DZIP1
chr1:15334007:15335773:clu_328_-	Splicing event	LRRK2
chr1:153341772:153342687:clu_6966_+	Splicing event	DZIP1
chr1:153342889:153343279:clu_6966_+	Splicing event	DZIP1
chr1:153343409:153346194:clu_6967_+	Splicing event	DZIP1
chr1:153349200:153349916:clu_2969_-	Splicing event	CLDN10
chr1:153350023:153354633:clu_2969_-	Splicing event	CLDN10
chr1:15335879:15336629:clu_328_-	Splicing event	LRRK2
chr1:153441433:153443674:clu_6970_+	Splicing event	ABCC4
chr1:153443794:153444466:clu_6970_+	Splicing event	ABCC4
chr1:153444681:153447958:clu_6970_+	Splicing event	ABCC4
chr1:153758212:153761443:clu_2975_-	Splicing event	GPR180
chr1:153761503:153763174:clu_2976_-	Splicing event	GPR180
chr1:153761503:153764693:clu_2976_-	Splicing event	GPR180
chr1:153763379:153764693:clu_2976_-	Splicing event	GPR180
chr1:153764851:153767011:clu_2977_-	Splicing event	GPR180
chr1:15613832:15615121:clu_4117_+	Splicing event	ABCD2
chr1:15716403:15719453:clu_4120_+	Splicing event	KIF21A
chr1:15719491:15721654:clu_4120_+	Splicing event	KIF21A
chr1:15731229:15735160:clu_4122_+	Splicing event	KIF21A
chr1:15738266:15741621:clu_4102_+	Splicing event	KIF21A
chr1:15741731:15742292:clu_4103_+	Splicing event	KIF21A
chr1:15741731:15746025:clu_4103_+	Splicing event	KIF21A
chr1:15742420:15746025:clu_4103_+	Splicing event	KIF21A
chr1:15870701:15873412:clu_4130_+	Splicing event	CPNE8
chr1:15871690:15873412:clu_4130_+	Splicing event	CPNE8
chr1:15889584:15891420:clu_4132_+	Splicing event	CPNE8
chr1:15908606:15912001:clu_4133_+	Splicing event	CPNE8
chr1:15908606:15918593:clu_4133_+	Splicing event	CPNE8
chr1:15919404:15921521:clu_4135_+	Splicing event	CPNE8
chr1:15928826:15931635:clu_4136_+	Splicing event	CPNE8
chr1:15928826:15936608:clu_4136_+	Splicing event	CPNE8
chr1:16040186:16040842:clu_4137_+	Splicing event	TPRKB
chr1:16040964:16041257:clu_4137_+	Splicing event	TPRKB
chr1:16041037:16041257:clu_4137_+	Splicing event	TPRKB
chr1:16054069:16054772:clu_4139_+	Splicing event	GTSE1
chr1:16054835:16054915:clu_4139_+	Splicing event	GTSE1
chr1:16056895:16057920:clu_4140_+	Splicing event	GTSE1
chr1:16058052:16059230:clu_4140_+	Splicing event	GTSE1
chr1:16069181:16071048:clu_4143_+	Splicing event	TRMU
chr1:16071225:16072147:clu_4143_+	Splicing event	TRMU
chr1:16072731:16073231:clu_4144_+	Splicing event	TRMU
chr1:16073331:16074781:clu_4144_+	Splicing event	TRMU
chr1:16089965:16091638:clu_334_-	Splicing event	CELSR1
chr1:16089998:16091638:clu_334_-	Splicing event	CELSR1
chr1:16092395:16093148:clu_335_-	Splicing event	CELSR1
chr1:16092437:16093148:clu_335_-	Splicing event	CELSR1
chr1:16094240:16094791:clu_336_-	Splicing event	CELSR1
chr1:16114289:16115453:clu_337_-	Splicing event	CELSR1
chr1:16114292:16115453:clu_337_-	Splicing event	CELSR1
chr1:161178507:161182244:clu_6997_+	Splicing event	SPRY2
chr1:161232:161668:clu_3794_+	Splicing event	LOC101793940
chr1:161232:161671:clu_3794_+	Splicing event	LOC101793940
chr1:161545192:161560691:clu_2989_-	Splicing event	NDFIP2
chr1:161553185:161556243:clu_2989_-	Splicing event	NDFIP2
chr1:161556302:161560691:clu_2989_-	Splicing event	NDFIP2
chr1:161560778:161562282:clu_2990_-	Splicing event	NDFIP2
chr1:161562438:161566647:clu_2991_-	Splicing event	NDFIP2
chr1:161566734:161581394:clu_2991_-	Splicing event	NDFIP2
chr1:161645949:161646379:clu_7001_+	Splicing event	RBM26
chr1:161645997:161646379:clu_7001_+	Splicing event	RBM26
chr1:161646024:161646379:clu_7001_+	Splicing event	RBM26
chr1:161654060:161657117:clu_7002_+	Splicing event	RBM26
chr1:161654060:161659393:clu_7002_+	Splicing event	RBM26
chr1:161657245:161659393:clu_7002_+	Splicing event	RBM26
chr1:161804:162424:clu_3795_+	Splicing event	LOC101793940
chr1:161804:162427:clu_3795_+	Splicing event	LOC101793940
chr1:162014637:162017624:clu_7007_+	Splicing event	OBI1
chr1:162017712:162026857:clu_7007_+	Splicing event	OBI1
chr1:162429396:162437947:clu_7009_+	Splicing event	EDNRB
chr1:162438059:162438302:clu_7009_+	Splicing event	EDNRB
chr1:162534:163025:clu_3795_+	Splicing event	LOC101793940
chr1:162773632:162783040:clu_7015_+	Splicing event	MYCBP2
chr1:162773632:162790057:clu_7015_+	Splicing event	MYCBP2
chr1:162783147:162785110:clu_7015_+	Splicing event	MYCBP2
chr1:162783147:162790057:clu_7015_+	Splicing event	MYCBP2
chr1:162785187:162790057:clu_7015_+	Splicing event	MYCBP2
chr1:162813532:162815270:clu_7017_+	Splicing event	MYCBP2
chr1:162813616:162815270:clu_7017_+	Splicing event	MYCBP2
chr1:162839639:162843886:clu_7020_+	Splicing event	MYCBP2
chr1:162839639:162850485:clu_7020_+	Splicing event	MYCBP2
chr1:162839639:162852675:clu_7020_+	Splicing event	MYCBP2
chr1:162844002:162844748:clu_7020_+	Splicing event	MYCBP2
chr1:162844888:162850485:clu_7020_+	Splicing event	MYCBP2
chr1:162844888:162852675:clu_7020_+	Splicing event	MYCBP2
chr1:162844888:162853834:clu_7020_+	Splicing event	MYCBP2
chr1:162850559:162852675:clu_7020_+	Splicing event	MYCBP2
chr1:162852899:162853834:clu_7020_+	Splicing event	MYCBP2
chr1:16285583:16310182:clu_4147_+	Splicing event	GRAMD4
chr1:162857015:162862064:clu_7021_+	Splicing event	MYCBP2
chr1:162857015:162862088:clu_7021_+	Splicing event	MYCBP2
chr1:162857015:162871033:clu_7021_+	Splicing event	MYCBP2
chr1:162862249:162871033:clu_7021_+	Splicing event	MYCBP2
chr1:162883236:162885181:clu_7022_+	Splicing event	MYCBP2
chr1:162885644:162886394:clu_7023_+	Splicing event	MYCBP2
chr1:162885653:162886394:clu_7023_+	Splicing event	MYCBP2
chr1:162925758:162927044:clu_7025_+	Splicing event	FBXL3
chr1:162925758:162927558:clu_7025_+	Splicing event	FBXL3
chr1:162927344:162927558:clu_7025_+	Splicing event	FBXL3
chr1:16292748:16310182:clu_4147_+	Splicing event	GRAMD4
chr1:162927680:162930746:clu_7025_+	Splicing event	FBXL3
chr1:162930917:162934983:clu_7025_+	Splicing event	FBXL3
chr1:162952305:162953354:clu_7026_+	Splicing event	LOC101794770
chr1:162952305:162955343:clu_7026_+	Splicing event	LOC101794770
chr1:162953525:162955343:clu_7026_+	Splicing event	LOC101794770
chr1:162963769:162965232:clu_3000_-	Splicing event	ACOD1
chr1:16304675:16310182:clu_4147_+	Splicing event	GRAMD4
chr1:16318256:16321078:clu_4149_+	Splicing event	GRAMD4
chr1:163338684:163340560:clu_3005_-	Splicing event	LMO7
chr1:163338684:163341659:clu_3005_-	Splicing event	LMO7
chr1:163340616:163341659:clu_3005_-	Splicing event	LMO7
chr1:163342473:163343962:clu_3006_-	Splicing event	LMO7
chr1:163342554:163343962:clu_3006_-	Splicing event	LMO7
chr1:163351505:163351635:clu_3009_-	Splicing event	LMO7
chr1:163351505:163351659:clu_3009_-	Splicing event	LMO7
chr1:163355614:163358301:clu_3010_-	Splicing event	LMO7
chr1:163355614:163362754:clu_3010_-	Splicing event	LMO7
chr1:163358330:163362754:clu_3010_-	Splicing event	LMO7
chr1:16345664:16346962:clu_4153_+	Splicing event	GRAMD4
chr1:16347053:16348399:clu_4153_+	Splicing event	GRAMD4
chr1:163504018:163505047:clu_7030_+	Splicing event	COMMD6
chr1:164006996:164073731:clu_7041_+	Splicing event	KLF12
chr1:164007237:164073731:clu_7041_+	Splicing event	KLF12
chr1:164007237:164102246:clu_7041_+	Splicing event	KLF12
chr1:164008274:164073731:clu_7041_+	Splicing event	KLF12
chr1:164073794:164102246:clu_7041_+	Splicing event	KLF12
chr1:164102335:164142840:clu_7041_+	Splicing event	KLF12
chr1:164102335:164158514:clu_7041_+	Splicing event	KLF12
chr1:164159060:164176472:clu_7042_+	Splicing event	KLF12
chr1:164176607:164189439:clu_7042_+	Splicing event	KLF12
chr1:164176607:164197321:clu_7042_+	Splicing event	KLF12
chr1:164176607:164229943:clu_7042_+	Splicing event	KLF12
chr1:164189498:164197321:clu_7042_+	Splicing event	KLF12
chr1:164189498:164229943:clu_7042_+	Splicing event	KLF12
chr1:164197362:164229943:clu_7042_+	Splicing event	KLF12
chr1:164503925:164523578:clu_3023_-	Splicing event	PIBF1
chr1:164540907:164546034:clu_3024_-	Splicing event	PIBF1
chr1:164546184:164552056:clu_3024_-	Splicing event	PIBF1
chr1:164622649:164622765:clu_7045_+	Splicing event	DIS3
chr1:164653351:164654133:clu_3029_-	Splicing event	BORA
chr1:164654307:164655815:clu_3029_-	Splicing event	BORA
chr1:16490982:16499062:clu_344_-	Splicing event	CERK
chr1:16504391:16512720:clu_345_-	Splicing event	CERK
chr1:16504391:16517465:clu_345_-	Splicing event	CERK
chr1:16512865:16517465:clu_345_-	Splicing event	CERK
chr1:16562208:16585844:clu_4150_+	Splicing event	TBC1D22A
chr1:16595064:16599203:clu_4151_+	Splicing event	TBC1D22A
chr1:171345644:171348734:clu_3047_-	Splicing event	TDRD3
chr1:175047004:175047390:clu_3064_-	Splicing event	SUGT1
chr1:175047459:175048058:clu_3065_-	Splicing event	SUGT1
chr1:175050756:175050840:clu_3066_-	Splicing event	SUGT1
chr1:175133509:175134450:clu_7076_+	Splicing event	WBP4
chr1:175134505:175137761:clu_7076_+	Splicing event	WBP4
chr1:175139930:175140744:clu_7078_+	Splicing event	WBP4
chr1:175152299:175153655:clu_3069_-	Splicing event	MTRF1
chr1:175152299:175155383:clu_3069_-	Splicing event	MTRF1
chr1:175153753:175155383:clu_3069_-	Splicing event	MTRF1
chr1:175158512:175159222:clu_3070_-	Splicing event	MTRF1
chr1:175158512:175159233:clu_3070_-	Splicing event	MTRF1
chr1:175159324:175161957:clu_3070_-	Splicing event	MTRF1
chr1:175162415:175164732:clu_3071_-	Splicing event	MTRF1
chr1:175162415:175169315:clu_3071_-	Splicing event	MTRF1
chr1:175195583:175196728:clu_7080_+	Splicing event	NAA16
chr1:175195583:175197693:clu_7080_+	Splicing event	NAA16
chr1:175196756:175197693:clu_7080_+	Splicing event	NAA16
chr1:175197788:175200753:clu_7080_+	Splicing event	NAA16
chr1:175200859:175219825:clu_7080_+	Splicing event	NAA16
chr1:175222837:175224579:clu_7082_+	Splicing event	NAA16
chr1:175222837:175225491:clu_7082_+	Splicing event	NAA16
chr1:175224772:175225491:clu_7082_+	Splicing event	NAA16
chr1:176001801:176002643:clu_7104_+	Splicing event	EPSTI1
chr1:176021182:176028056:clu_7105_+	Splicing event	DNAJC15
chr1:176028132:176033737:clu_7105_+	Splicing event	DNAJC15
chr1:176081933:176096995:clu_3082_-	Splicing event	ENOX1
chr1:176081933:176101595:clu_3082_-	Splicing event	ENOX1
chr1:176097051:176101595:clu_3082_-	Splicing event	ENOX1
chr1:176138523:176141757:clu_3083_-	Splicing event	ENOX1
chr1:176141863:176158498:clu_3083_-	Splicing event	ENOX1
chr1:176211643:176212483:clu_3091_-	Splicing event	ENOX1
chr1:176212618:176266860:clu_3087_-	Splicing event	ENOX1
chr1:176475584:176478564:clu_7109_+	Splicing event	LACC1
chr1:176478314:176478564:clu_7109_+	Splicing event	LACC1
chr1:176915830:176919243:clu_3101_-	Splicing event	LOC101800907
chr1:176928564:176930003:clu_7112_+	Splicing event	GTF2F2
chr1:176993154:177000613:clu_7114_+	Splicing event	GTF2F2
chr1:177011356:177011796:clu_3092_-	Splicing event	LOC119715617
chr1:177012734:177013089:clu_3093_-	Splicing event	LOC119715617
chr1:177013162:177013365:clu_3094_-	Splicing event	LOC119715617
chr1:177030920:177031366:clu_3092_-	Splicing event	LOC119715620
chr1:177051008:177051367:clu_3095_-	Splicing event	LOC101801417
chr1:177051072:177051367:clu_3095_-	Splicing event	LOC101801417
chr1:177051440:177051644:clu_3094_-	Splicing event	LOC101801417
chr1:177067033:177069488:clu_7121_+	Splicing event	LOC119712994
chr1:177067765:177069488:clu_7121_+	Splicing event	LOC119712994
chr1:177067812:177069488:clu_7121_+	Splicing event	LOC119712994
chr1:177069566:177070136:clu_7123_+	Splicing event	LOC119712994
chr1:177071064:177071345:clu_7124_+	Splicing event	LOC119712994
chr1:177074223:177074628:clu_7125_+	Splicing event	LOC119712994
chr1:177074766:177075005:clu_7126_+	Splicing event	LOC119712994
chr1:177081853:177083098:clu_7127_+	Splicing event	LOC101792784
chr1:177083263:177084787:clu_7128_+	Splicing event	LOC101792784
chr1:177086968:177087149:clu_7130_+	Splicing event	LOC101792784
chr1:177087192:177087425:clu_7130_+	Splicing event	LOC101792784
chr1:177088113:177090255:clu_7131_+	Splicing event	LOC101792784
chr1:177091825:177095106:clu_7129_+	Splicing event	LOC101792784
chr1:177095211:177097114:clu_7132_+	Splicing event	LOC101792784
chr1:177115601:177115808:clu_3094_-	Splicing event	LOC119716819
chr1:177131045:177133500:clu_7121_+	Splicing event	LOC101792067
chr1:177131777:177133500:clu_7121_+	Splicing event	LOC101792067
chr1:177131824:177133500:clu_7121_+	Splicing event	LOC101792067
chr1:177133578:177134148:clu_7123_+	Splicing event	LOC101792067
chr1:177135080:177135361:clu_7124_+	Splicing event	LOC101792067
chr1:177138234:177138639:clu_7125_+	Splicing event	LOC101792067
chr1:177138777:177139017:clu_7126_+	Splicing event	LOC101792067
chr1:177146304:177147541:clu_7127_+	Splicing event	LOC119715627
chr1:177147706:177149223:clu_7128_+	Splicing event	LOC119715627
chr1:177152516:177154654:clu_7131_+	Splicing event	LOC119715627
chr1:177156227:177159645:clu_7129_+	Splicing event	LOC119715627
chr1:177159750:177161668:clu_7132_+	Splicing event	LOC119715627
chr1:177479042:177479212:clu_3112_-	Splicing event	RUBCNL
chr1:177616912:177617932:clu_7140_+	Splicing event	LRCH1
chr1:177618018:177620709:clu_7140_+	Splicing event	LRCH1
chr1:177618018:177620915:clu_7140_+	Splicing event	LRCH1
chr1:177620798:177620915:clu_7140_+	Splicing event	LRCH1
chr1:177658629:177659560:clu_3115_-	Splicing event	ESD
chr1:177665459:177666365:clu_3113_-	Splicing event	ESD
chr1:177665462:177666365:clu_3113_-	Splicing event	ESD
chr1:177666435:177667520:clu_3114_-	Splicing event	ESD
chr1:178045737:178061330:clu_7144_+	Splicing event	ITM2B
chr1:178061455:178063502:clu_7145_+	Splicing event	ITM2B
chr1:178169450:178171539:clu_3122_-	Splicing event	RCBTB2
chr1:178171729:178175309:clu_3122_-	Splicing event	RCBTB2
chr1:178181358:178184079:clu_3123_-	Splicing event	RCBTB2
chr1:178184268:178189767:clu_3124_-	Splicing event	RCBTB2
chr1:178184268:178190221:clu_3124_-	Splicing event	RCBTB2
chr1:178184268:178193008:clu_3124_-	Splicing event	RCBTB2
chr1:178189889:178190221:clu_3124_-	Splicing event	RCBTB2
chr1:178190285:178193008:clu_3124_-	Splicing event	RCBTB2
chr1:178239932:178246105:clu_7152_+	Splicing event	CYSLTR2
chr1:178337244:178353019:clu_7146_+	Splicing event	FNDC3A
chr1:178337419:178353019:clu_7146_+	Splicing event	FNDC3A
chr1:178422640:178427269:clu_7153_+	Splicing event	FNDC3A
chr1:178423382:178427269:clu_7153_+	Splicing event	FNDC3A
chr1:178468128:178469676:clu_7157_+	Splicing event	CDADC1
chr1:178469853:178470666:clu_7157_+	Splicing event	CDADC1
chr1:178470034:178470666:clu_7157_+	Splicing event	CDADC1
chr1:178471244:178473295:clu_7158_+	Splicing event	CDADC1
chr1:178473344:178474405:clu_7158_+	Splicing event	CDADC1
chr1:178486289:178492892:clu_3128_-	Splicing event	CAB39L
chr1:178499119:178503980:clu_3129_-	Splicing event	CAB39L
chr1:178504098:178508739:clu_3129_-	Splicing event	CAB39L
chr1:178508903:178520791:clu_3130_-	Splicing event	CAB39L
chr1:178520939:178529570:clu_3130_-	Splicing event	CAB39L
chr1:178554138:178554920:clu_7164_+	Splicing event	LOC101790074
chr1:178557472:178558429:clu_7167_+	Splicing event	LOC101790074
chr1:178558534:178559162:clu_7167_+	Splicing event	LOC101790074
chr1:178559490:178560419:clu_7168_+	Splicing event	LOC101790074
chr1:178559490:178560424:clu_7168_+	Splicing event	LOC101790074
chr1:178560507:178562295:clu_7168_+	Splicing event	LOC101790074
chr1:178571713:178573714:clu_7171_+	Splicing event	LOC101790074
chr1:178571713:178575769:clu_7171_+	Splicing event	LOC101790074
chr1:178573760:178575769:clu_7171_+	Splicing event	LOC101790074
chr1:178575827:178576710:clu_7172_+	Splicing event	LOC101790074
chr1:178576776:178577743:clu_7172_+	Splicing event	LOC101790074
chr1:178582242:178583066:clu_3133_-	Splicing event	RCBTB1
chr1:178582617:178583066:clu_3133_-	Splicing event	RCBTB1
chr1:178582719:178583066:clu_3133_-	Splicing event	RCBTB1
chr1:178599891:178604750:clu_3125_-	Splicing event	RCBTB1
chr1:178599891:178605114:clu_3125_-	Splicing event	RCBTB1
chr1:178599911:178604750:clu_3125_-	Splicing event	RCBTB1
chr1:178599911:178605114:clu_3125_-	Splicing event	RCBTB1
chr1:178703252:178703643:clu_7178_+	Splicing event	TRIM13
chr1:178703257:178703643:clu_7178_+	Splicing event	TRIM13
chr1:178703428:178703643:clu_7178_+	Splicing event	TRIM13
chr1:178764094:178786302:clu_7183_+	Splicing event	LOC101802544
chr1:178797309:178807559:clu_7185_+	Splicing event	LOC101802544
chr1:178807634:178814220:clu_7185_+	Splicing event	LOC101802544
chr1:178814277:178817974:clu_7185_+	Splicing event	LOC101802544
chr1:178818144:178827790:clu_7186_+	Splicing event	LOC101802544
chr1:178827940:178831386:clu_7187_+	Splicing event	LOC101802544
chr1:179195692:179198520:clu_7193_+	Splicing event	RNASEH2B
chr1:179211487:179222281:clu_7195_+	Splicing event	RNASEH2B
chr1:179438022:179467928:clu_7197_+	Splicing event	WDFY2
chr1:179438491:179467928:clu_7197_+	Splicing event	WDFY2
chr1:179455967:179467928:clu_7197_+	Splicing event	WDFY2
chr1:179491879:179491987:clu_7203_+	Splicing event	WDFY2
chr1:179501846:179503111:clu_3159_-	Splicing event	DHRS12
chr1:179503201:179503756:clu_3159_-	Splicing event	DHRS12
chr1:179504818:179513235:clu_3160_-	Splicing event	DHRS12
chr1:179513792:179513996:clu_3161_-	Splicing event	DHRS12
chr1:179595986:179596553:clu_3165_-	Splicing event	ATP7B
chr1:179595986:179597090:clu_3165_-	Splicing event	ATP7B
chr1:179596727:179597090:clu_3165_-	Splicing event	ATP7B
chr1:179604305:179610821:clu_3166_-	Splicing event	ATP7B
chr1:179620151:179622201:clu_3167_-	Splicing event	ATP7B
chr1:179622431:179623444:clu_3168_-	Splicing event	ATP7B
chr1:179655270:179655955:clu_3174_-	Splicing event	NEK3
chr1:179656089:179657177:clu_3174_-	Splicing event	NEK3
chr1:179657323:179657715:clu_3175_-	Splicing event	NEK3
chr1:179657817:179658723:clu_3175_-	Splicing event	NEK3
chr1:179658766:179659462:clu_3176_-	Splicing event	NEK3
chr1:179659531:179659856:clu_3177_-	Splicing event	NEK3
chr1:179676573:179678230:clu_3180_-	Splicing event	CKAP2
chr1:179695161:179697400:clu_7199_+	Splicing event	VPS36
chr1:179719497:179726418:clu_7207_+	Splicing event	THSD1
chr1:179750434:179750790:clu_7208_+	Splicing event	LOC101794119
chr1:179763484:179764509:clu_7209_+	Splicing event	LOC101794119
chr1:179764614:179765265:clu_7209_+	Splicing event	LOC101794119
chr1:179773570:179776458:clu_3184_-	Splicing event	SLC25A15
chr1:179780507:179781941:clu_3186_-	Splicing event	SLC25A15
chr1:180238588:180357786:clu_7218_+	Splicing event	LHFPL6
chr1:180357884:180371925:clu_7218_+	Splicing event	LHFPL6
chr1:180522083:180524416:clu_7221_+	Splicing event	PROSER1
chr1:180526981:180528358:clu_7223_+	Splicing event	PROSER1
chr1:180526981:180531149:clu_7223_+	Splicing event	PROSER1
chr1:180885499:180892655:clu_3203_-	Splicing event	UFM1
chr1:181357066:181357993:clu_7232_+	Splicing event	POSTN
chr1:181357066:181361270:clu_7232_+	Splicing event	POSTN
chr1:181357066:181361935:clu_7232_+	Splicing event	POSTN
chr1:181358040:181361270:clu_7232_+	Splicing event	POSTN
chr1:181358040:181361935:clu_7232_+	Splicing event	POSTN
chr1:181361365:181361935:clu_7232_+	Splicing event	POSTN
chr1:181363699:181364108:clu_7233_+	Splicing event	POSTN
chr1:181363699:181368475:clu_7233_+	Splicing event	POSTN
chr1:181363699:181368478:clu_7233_+	Splicing event	POSTN
chr1:181364188:181366334:clu_7233_+	Splicing event	POSTN
chr1:181364188:181368475:clu_7233_+	Splicing event	POSTN
chr1:181366420:181368475:clu_7233_+	Splicing event	POSTN
chr1:181649755:181656911:clu_7237_+	Splicing event	SUPT20H
chr1:181649755:181656914:clu_7237_+	Splicing event	SUPT20H
chr1:181667772:181669787:clu_7238_+	Splicing event	SUPT20H
chr1:181667772:181669790:clu_7238_+	Splicing event	SUPT20H
chr1:181667772:181670131:clu_7238_+	Splicing event	SUPT20H
chr1:181670298:181672064:clu_7239_+	Splicing event	SUPT20H
chr1:181670298:181672307:clu_7239_+	Splicing event	SUPT20H
chr1:182012722:182018044:clu_7246_+	Splicing event	SPART
chr1:182012982:182018044:clu_7246_+	Splicing event	SPART
chr1:182020105:182021062:clu_7247_+	Splicing event	SPART
chr1:182020105:182022510:clu_7247_+	Splicing event	SPART
chr1:182021166:182022510:clu_7247_+	Splicing event	SPART
chr1:182024982:182025917:clu_7248_+	Splicing event	SPART
chr1:182024982:182028142:clu_7248_+	Splicing event	SPART
chr1:182025973:182028142:clu_7248_+	Splicing event	SPART
chr1:182428236:182429761:clu_3220_-	Splicing event	NBEA
chr1:183512315:183594026:clu_7262_+	Splicing event	STARD13
chr1:183594097:183596115:clu_7263_+	Splicing event	STARD13
chr1:183596196:183604027:clu_7263_+	Splicing event	STARD13
chr1:183604090:183609306:clu_7263_+	Splicing event	STARD13
chr1:183614531:183619677:clu_7264_+	Splicing event	STARD13
chr1:183619875:183622948:clu_7264_+	Splicing event	STARD13
chr1:183623155:183624018:clu_7265_+	Splicing event	STARD13
chr1:183624132:183624909:clu_7265_+	Splicing event	STARD13
chr1:183802871:183805097:clu_3246_-	Splicing event	PDS5B
chr1:183802871:183805290:clu_3246_-	Splicing event	PDS5B
chr1:183805198:183805290:clu_3246_-	Splicing event	PDS5B
chr1:183805732:183808806:clu_3250_-	Splicing event	PDS5B
chr1:183805732:183808812:clu_3250_-	Splicing event	PDS5B
chr1:183816528:183820877:clu_3247_-	Splicing event	PDS5B
chr1:183821081:183824264:clu_3247_-	Splicing event	PDS5B
chr1:183923760:183924078:clu_7267_+	Splicing event	N4BP2L2
chr1:183923760:183925974:clu_7267_+	Splicing event	N4BP2L2
chr1:183924249:183925974:clu_7267_+	Splicing event	N4BP2L2
chr1:183939533:183957665:clu_7270_+	Splicing event	N4BP2L2
chr1:183959463:183961796:clu_7271_+	Splicing event	N4BP2L2
chr1:183961881:183962608:clu_7271_+	Splicing event	N4BP2L2
chr1:183963743:183967002:clu_7272_+	Splicing event	N4BP2L2
chr1:183977462:183979656:clu_7274_+	Splicing event	N4BP2L1
chr1:184388317:184390197:clu_3280_-	Splicing event	B3GLCT
chr1:184388317:184394627:clu_3280_-	Splicing event	B3GLCT
chr1:184390310:184392877:clu_3280_-	Splicing event	B3GLCT
chr1:184390310:184394627:clu_3280_-	Splicing event	B3GLCT
chr1:184392962:184394627:clu_3280_-	Splicing event	B3GLCT
chr1:184409925:184422257:clu_3282_-	Splicing event	B3GLCT
chr1:184417484:184422257:clu_3282_-	Splicing event	B3GLCT
chr1:184473464:184474247:clu_7276_+	Splicing event	HSPH1
chr1:184473464:184475131:clu_7276_+	Splicing event	HSPH1
chr1:184474378:184475131:clu_7276_+	Splicing event	HSPH1
chr1:184613001:184613429:clu_3283_-	Splicing event	LOC101797163
chr1:184613499:184614580:clu_3284_-	Splicing event	LOC101797163
chr1:184683110:184685311:clu_7282_+	Splicing event	HMGB1
chr1:184685403:184685782:clu_7282_+	Splicing event	HMGB1
chr1:184885334:184887345:clu_7283_+	Splicing event	UBL3
chr1:185267615:185269052:clu_7291_+	Splicing event	SLC46A3
chr1:185269208:185271166:clu_7291_+	Splicing event	SLC46A3
chr1:185282208:185282755:clu_3308_-	Splicing event	LOC101796609
chr1:185384343:185389335:clu_7294_+	Splicing event	FLT1
chr1:185410957:185411512:clu_7297_+	Splicing event	FLT1
chr1:185411634:185412544:clu_7297_+	Splicing event	FLT1
chr1:185432790:185433526:clu_3310_-	Splicing event	PAN3
chr1:185432790:185436554:clu_3310_-	Splicing event	PAN3
chr1:185433590:185436554:clu_3310_-	Splicing event	PAN3
chr1:185436683:185437609:clu_3310_-	Splicing event	PAN3
chr1:185437748:185443548:clu_3310_-	Splicing event	PAN3
chr1:185444236:185450756:clu_3311_-	Splicing event	PAN3
chr1:185465574:185470367:clu_3313_-	Splicing event	PAN3
chr1:185465574:185474039:clu_3313_-	Splicing event	PAN3
chr1:185470466:185474039:clu_3313_-	Splicing event	PAN3
chr1:185474200:185482847:clu_3313_-	Splicing event	PAN3
chr1:185482909:185485082:clu_3314_-	Splicing event	PAN3
chr1:185484212:185485082:clu_3314_-	Splicing event	PAN3
chr1:185496938:185503736:clu_3315_-	Splicing event	PAN3
chr1:185496938:185509509:clu_3315_-	Splicing event	PAN3
chr1:185503876:185509509:clu_3315_-	Splicing event	PAN3
chr1:185529655:185531803:clu_7302_+	Splicing event	FLT3
chr1:185554820:185555594:clu_7308_+	Splicing event	FLT3
chr1:185670057:185677735:clu_3317_-	Splicing event	LOC106016383
chr1:185678107:185710849:clu_7310_+	Splicing event	LNX2
chr1:185726469:185728555:clu_7314_+	Splicing event	LNX2
chr1:185728732:185730382:clu_7314_+	Splicing event	LNX2
chr1:185771296:185771549:clu_3322_-	Splicing event	GTF3A
chr1:185771608:185771684:clu_3322_-	Splicing event	GTF3A
chr1:185774877:185775220:clu_3323_-	Splicing event	GTF3A
chr1:185775320:185775432:clu_3323_-	Splicing event	GTF3A
chr1:185838138:185838375:clu_3319_-	Splicing event	RPL21
chr1:185838138:185839069:clu_3319_-	Splicing event	RPL21
chr1:185879130:185879336:clu_7318_+	Splicing event	USP12
chr1:185879419:185882932:clu_7318_+	Splicing event	USP12
chr1:186038305:186039951:clu_3326_-	Splicing event	WASF3
chr1:186040214:186041063:clu_3326_-	Splicing event	WASF3
chr1:186041229:186048927:clu_3326_-	Splicing event	WASF3
chr1:186214923:186215613:clu_7321_+	Splicing event	RNF6
chr1:186214923:186218327:clu_7321_+	Splicing event	RNF6
chr1:186215694:186218327:clu_7321_+	Splicing event	RNF6
chr1:186449879:186454169:clu_7325_+	Splicing event	ATP8A2
chr1:186453918:186454169:clu_7325_+	Splicing event	ATP8A2
chr1:186525154:186540181:clu_7328_+	Splicing event	ATP8A2
chr1:186540272:186547237:clu_7328_+	Splicing event	ATP8A2
chr1:186578982:186581687:clu_3335_-	Splicing event	NUP58
chr1:186578982:186588511:clu_3335_-	Splicing event	NUP58
chr1:186581785:186588511:clu_3335_-	Splicing event	NUP58
chr1:186588712:186591575:clu_3335_-	Splicing event	NUP58
chr1:186600320:186601034:clu_3331_-	Splicing event	NUP58
chr1:186601168:186602174:clu_3331_-	Splicing event	NUP58
chr1:186603601:186604832:clu_3332_-	Splicing event	NUP58
chr1:186603604:186604832:clu_3332_-	Splicing event	NUP58
chr1:186609966:186613966:clu_7329_+	Splicing event	MTMR6
chr1:186620559:186625032:clu_7331_+	Splicing event	MTMR6
chr1:186625141:186626234:clu_7331_+	Splicing event	MTMR6
chr1:186626359:186627630:clu_7332_+	Splicing event	MTMR6
chr1:186627679:186628581:clu_7332_+	Splicing event	MTMR6
chr1:186836676:186849904:clu_7337_+	Splicing event	SPATA13
chr1:186851691:186863386:clu_7338_+	Splicing event	SPATA13
chr1:186861519:186863386:clu_7338_+	Splicing event	SPATA13
chr1:186865729:186875950:clu_7339_+	Splicing event	SPATA13
chr1:186873997:186875950:clu_7339_+	Splicing event	SPATA13
chr1:186921024:186924077:clu_7342_+	Splicing event	LOC101800508
chr1:186922259:186924077:clu_7342_+	Splicing event	LOC101800508
chr1:186947448:186950640:clu_7344_+	Splicing event	LOC101800508
chr1:187014687:187015480:clu_3339_-	Splicing event	TNFRSF19
chr1:187015605:187016837:clu_3339_-	Splicing event	TNFRSF19
chr1:187057536:187064571:clu_3341_-	Splicing event	TNFRSF19
chr1:187057536:187069726:clu_3341_-	Splicing event	TNFRSF19
chr1:188181511:188182401:clu_7360_+	Splicing event	LOC101790702
chr1:188182566:188184174:clu_7361_+	Splicing event	LOC101790702
chr1:188199639:188200972:clu_3353_-	Splicing event	LOC101790891
chr1:188245407:188246372:clu_7354_+	Splicing event	LOC101792807
chr1:188246487:188246911:clu_7356_+	Splicing event	LOC101792807
chr1:188246487:188249137:clu_7356_+	Splicing event	LOC101792807
chr1:188246988:188249137:clu_7356_+	Splicing event	LOC101792807
chr1:188276080:188277413:clu_3353_-	Splicing event	LOC119716050
chr1:188303496:188307787:clu_7357_+	Splicing event	LATS2
chr1:188303501:188307787:clu_7357_+	Splicing event	LATS2
chr1:188428808:188430367:clu_7374_+	Splicing event	XPO4
chr1:188430536:188431480:clu_7374_+	Splicing event	XPO4
chr1:188513854:188516525:clu_3364_-	Splicing event	IFT88
chr1:188518147:188518238:clu_3365_-	Splicing event	IFT88
chr1:188518352:188518996:clu_3365_-	Splicing event	IFT88
chr1:188522874:188522951:clu_3367_-	Splicing event	IFT88
chr1:188523014:188524140:clu_3367_-	Splicing event	IFT88
chr1:188524193:188525413:clu_3368_-	Splicing event	IFT88
chr1:188525469:188526672:clu_3369_-	Splicing event	IFT88
chr1:188526734:188527755:clu_3369_-	Splicing event	IFT88
chr1:188527859:188528381:clu_3369_-	Splicing event	IFT88
chr1:188535612:188538357:clu_7378_+	Splicing event	CRYL1
chr1:188628623:188628899:clu_7382_+	Splicing event	LOC101797703
chr1:188628674:188628899:clu_7382_+	Splicing event	LOC101797703
chr1:188724690:188725071:clu_3371_-	Splicing event	ZMYM2
chr1:188725322:188726392:clu_3371_-	Splicing event	ZMYM2
chr1:188726506:188730836:clu_3372_-	Splicing event	ZMYM2
chr1:188730987:188731916:clu_3372_-	Splicing event	ZMYM2
chr1:188739692:188756873:clu_3357_-	Splicing event	ZMYM2
chr1:188745697:188756873:clu_3357_-	Splicing event	ZMYM2
chr1:188757511:188763300:clu_3358_-	Splicing event	ZMYM2
chr1:188757511:188775977:clu_3358_-	Splicing event	ZMYM2
chr1:188764352:188775977:clu_3358_-	Splicing event	ZMYM2
chr1:188774792:188775977:clu_3358_-	Splicing event	ZMYM2
chr1:188787675:188788963:clu_3361_-	Splicing event	ZMYM2
chr1:188787675:188788993:clu_3361_-	Splicing event	ZMYM2
chr1:188787678:188788963:clu_3361_-	Splicing event	ZMYM2
chr1:188787678:188788993:clu_3361_-	Splicing event	ZMYM2
chr1:188910702:188913695:clu_7387_+	Splicing event	LOC119716112
chr1:188933121:188933576:clu_3378_-	Splicing event	MPHOSPH8
chr1:188933121:188934919:clu_3378_-	Splicing event	MPHOSPH8
chr1:188933785:188934919:clu_3378_-	Splicing event	MPHOSPH8
chr1:188933827:188934919:clu_3378_-	Splicing event	MPHOSPH8
chr1:188948344:188949251:clu_3383_-	Splicing event	PARP4
chr1:188948344:188951248:clu_3383_-	Splicing event	PARP4
chr1:188949353:188951248:clu_3383_-	Splicing event	PARP4
chr1:188995132:188995248:clu_3389_-	Splicing event	PARP4
chr1:188995132:188996304:clu_3389_-	Splicing event	PARP4
chr1:189016049:189017365:clu_3390_-	Splicing event	RNF17
chr1:189265237:189266005:clu_7395_+	Splicing event	ARHGAP20
chr1:189266116:189268358:clu_7395_+	Splicing event	ARHGAP20
chr1:189304847:189309516:clu_3401_-	Splicing event	FDX1
chr1:189346644:189349799:clu_7388_+	Splicing event	RDX
chr1:189349918:189351262:clu_7388_+	Splicing event	RDX
chr1:189391815:189404199:clu_3402_-	Splicing event	ZC3H12C
chr1:189404965:189424554:clu_3402_-	Splicing event	ZC3H12C
chr1:189991542:190003505:clu_7399_+	Splicing event	EXPH5
chr1:190006304:190010783:clu_7401_+	Splicing event	EXPH5
chr1:190036150:190036470:clu_7403_+	Splicing event	POGLUT3
chr1:190036600:190037175:clu_7403_+	Splicing event	POGLUT3
chr1:190069994:190070118:clu_3406_-	Splicing event	ATM
chr1:190069997:190070118:clu_3406_-	Splicing event	ATM
chr1:190072664:190072742:clu_3407_-	Splicing event	ATM
chr1:190072828:190074086:clu_3407_-	Splicing event	ATM
chr1:190095120:190095215:clu_3415_-	Splicing event	ATM
chr1:190095303:190095986:clu_3415_-	Splicing event	ATM
chr1:190099691:190100333:clu_3416_-	Splicing event	ATM
chr1:190100474:190101130:clu_3416_-	Splicing event	ATM
chr1:190101301:190102611:clu_3416_-	Splicing event	ATM
chr1:190115395:190115506:clu_3420_-	Splicing event	ATM
chr1:190115588:190116123:clu_3420_-	Splicing event	ATM
chr1:190124356:190125709:clu_3423_-	Splicing event	ATM
chr1:190124356:190125762:clu_3423_-	Splicing event	ATM
chr1:190144588:190145084:clu_7405_+	Splicing event	LOC101789739
chr1:190165606:190169081:clu_3409_-	Splicing event	ACAT1
chr1:190172273:190173579:clu_3410_-	Splicing event	ACAT1
chr1:190172273:190174020:clu_3410_-	Splicing event	ACAT1
chr1:190255841:190260925:clu_7409_+	Splicing event	SLC35F2
chr1:190261775:190266757:clu_7410_+	Splicing event	SLC35F2
chr1:190266916:190268384:clu_7411_+	Splicing event	SLC35F2
chr1:190266916:190269341:clu_7411_+	Splicing event	SLC35F2
chr1:190268540:190269341:clu_7411_+	Splicing event	SLC35F2
chr1:190386679:190389696:clu_7414_+	Splicing event	ALKBH8
chr1:190388333:190389696:clu_7414_+	Splicing event	ALKBH8
chr1:190389839:190394954:clu_7415_+	Splicing event	ALKBH8
chr1:190396423:190397111:clu_7417_+	Splicing event	ALKBH8
chr1:190401073:190418155:clu_7416_+	Splicing event	ALKBH8
chr1:190418261:190421991:clu_7416_+	Splicing event	ALKBH8
chr1:190422145:190422984:clu_7418_+	Splicing event	ALKBH8
chr1:191047312:191048349:clu_3439_-	Splicing event	AASDHPPT
chr1:191856844:191941237:clu_7431_+	Splicing event	PDGFD
chr1:191945708:191972430:clu_7432_+	Splicing event	PDGFD
chr1:191972489:191977239:clu_7432_+	Splicing event	PDGFD
chr1:192204:192331:clu_13_-	Splicing event	NME6
chr1:192217566:192229057:clu_3448_-	Splicing event	DYNC2H1
chr1:192255382:192258490:clu_3450_-	Splicing event	DYNC2H1
chr1:192258650:192260060:clu_3450_-	Splicing event	DYNC2H1
chr1:192260132:192262183:clu_3450_-	Splicing event	DYNC2H1
chr1:192263487:192265035:clu_3450_-	Splicing event	DYNC2H1
chr1:192270615:192271900:clu_3451_-	Splicing event	DYNC2H1
chr1:192272043:192272900:clu_3451_-	Splicing event	DYNC2H1
chr1:192275217:192277654:clu_3453_-	Splicing event	DYNC2H1
chr1:192277777:192279034:clu_3453_-	Splicing event	DYNC2H1
chr1:192300858:192302352:clu_3455_-	Splicing event	DYNC2H1
chr1:192302454:192303467:clu_3455_-	Splicing event	DYNC2H1
chr1:192322819:192323608:clu_3456_-	Splicing event	DYNC2H1
chr1:192323813:192324533:clu_3456_-	Splicing event	DYNC2H1
chr1:192340259:192340825:clu_3457_-	Splicing event	DYNC2H1
chr1:192340943:192341322:clu_3457_-	Splicing event	DYNC2H1
chr1:192491:192916:clu_14_-	Splicing event	NME6
chr1:192597548:192599809:clu_7448_+	Splicing event	TMEM123
chr1:192597548:192604344:clu_7448_+	Splicing event	TMEM123
chr1:192599880:192604344:clu_7448_+	Splicing event	TMEM123
chr1:192668565:192677129:clu_3464_-	Splicing event	YAP1
chr1:192668565:192678685:clu_3464_-	Splicing event	YAP1
chr1:192668565:192678697:clu_3464_-	Splicing event	YAP1
chr1:192675980:192677129:clu_3464_-	Splicing event	YAP1
chr1:192677176:192678685:clu_3464_-	Splicing event	YAP1
chr1:192677176:192678697:clu_3464_-	Splicing event	YAP1
chr1:192678878:192691040:clu_3465_-	Splicing event	YAP1
chr1:192691153:192698839:clu_3465_-	Splicing event	YAP1
chr1:192955:193047:clu_14_-	Splicing event	NME6
chr1:193149:193237:clu_14_-	Splicing event	NME6
chr1:193178235:193179443:clu_7454_+	Splicing event	PGR
chr1:193179594:193193800:clu_7454_+	Splicing event	PGR
chr1:193193916:193202220:clu_7455_+	Splicing event	PGR
chr1:193207201:193212089:clu_7457_+	Splicing event	PGR
chr1:193285509:193288153:clu_3482_-	Splicing event	ARHGAP42
chr1:193288312:193292818:clu_3482_-	Splicing event	ARHGAP42
chr1:193315592:193319882:clu_3479_-	Splicing event	ARHGAP42
chr1:193319983:193339523:clu_3479_-	Splicing event	ARHGAP42
chr1:193319983:193373673:clu_3479_-	Splicing event	ARHGAP42
chr1:193339594:193373673:clu_3479_-	Splicing event	ARHGAP42
chr1:193373734:193393754:clu_3480_-	Splicing event	ARHGAP42
chr1:19430122:19434581:clu_354_-	Splicing event	BRD1
chr1:19430122:19446035:clu_354_-	Splicing event	BRD1
chr1:19430122:19449647:clu_354_-	Splicing event	BRD1
chr1:19434842:19446035:clu_354_-	Splicing event	BRD1
chr1:19446139:19449647:clu_354_-	Splicing event	BRD1
chr1:19446523:19449647:clu_354_-	Splicing event	BRD1
chr1:19453262:19459614:clu_355_-	Splicing event	BRD1
chr1:19459770:19472548:clu_355_-	Splicing event	BRD1
chr1:19473928:19477355:clu_356_-	Splicing event	BRD1
chr1:19473928:19478372:clu_356_-	Splicing event	BRD1
chr1:19489439:19509888:clu_4163_+	Splicing event	ZBED4
chr1:19491320:19509888:clu_4163_+	Splicing event	ZBED4
chr1:19532604:19536061:clu_359_-	Splicing event	ALG12
chr1:19536177:19536456:clu_357_-	Splicing event	ALG12
chr1:19536177:19536564:clu_357_-	Splicing event	ALG12
chr1:195434254:195485260:clu_7464_+	Splicing event	MAML2
chr1:19545794:19546336:clu_4168_+	Splicing event	CRELD2
chr1:195485463:195489246:clu_7464_+	Splicing event	MAML2
chr1:195516534:195537819:clu_7465_+	Splicing event	MTMR2
chr1:195537924:195554049:clu_7465_+	Splicing event	MTMR2
chr1:195556915:195557099:clu_7466_+	Splicing event	MTMR2
chr1:195600016:195601945:clu_7471_+	Splicing event	FAM76B
chr1:195600016:195602192:clu_7471_+	Splicing event	FAM76B
chr1:195601992:195602192:clu_7471_+	Splicing event	FAM76B
chr1:195601992:195602944:clu_7471_+	Splicing event	FAM76B
chr1:195602272:195602944:clu_7471_+	Splicing event	FAM76B
chr1:195602272:195602947:clu_7471_+	Splicing event	FAM76B
chr1:195603079:195605047:clu_7471_+	Splicing event	FAM76B
chr1:195735363:195759559:clu_7472_+	Splicing event	SESN3
chr1:195764336:195765862:clu_7476_+	Splicing event	SESN3
chr1:195764336:195765883:clu_7476_+	Splicing event	SESN3
chr1:195768311:195770874:clu_7477_+	Splicing event	SESN3
chr1:195771064:195771457:clu_7477_+	Splicing event	SESN3
chr1:195771601:195772386:clu_7477_+	Splicing event	SESN3
chr1:195772509:195772771:clu_7478_+	Splicing event	SESN3
chr1:195806692:195807376:clu_7473_+	Splicing event	CWC15
chr1:195821684:195822274:clu_7479_+	Splicing event	CWC15
chr1:195965098:195965412:clu_7480_+	Splicing event	MRE11
chr1:195965317:195965412:clu_7480_+	Splicing event	MRE11
chr1:195967086:195967776:clu_7481_+	Splicing event	MRE11
chr1:195967086:195967795:clu_7481_+	Splicing event	MRE11
chr1:195971691:195972120:clu_7483_+	Splicing event	MRE11
chr1:196155141:196155543:clu_3511_-	Splicing event	MED17
chr1:196155709:196155864:clu_3511_-	Splicing event	MED17
chr1:196164342:196165688:clu_3512_-	Splicing event	C1H11orf54
chr1:196166807:196167186:clu_7492_+	Splicing event	TAF1D
chr1:196167061:196167186:clu_7492_+	Splicing event	TAF1D
chr1:196172247:196172404:clu_7496_+	Splicing event	TAF1D
chr1:196173840:196174147:clu_7500_+	Splicing event	TAF1D
chr1:196173840:196174193:clu_7500_+	Splicing event	TAF1D
chr1:196246329:196264112:clu_7501_+	Splicing event	SMCO4
chr1:196264284:196271053:clu_7501_+	Splicing event	SMCO4
chr1:196269453:196271053:clu_7501_+	Splicing event	SMCO4
chr1:196389269:196402691:clu_7502_+	Splicing event	SLC36A4
chr1:196404905:196405828:clu_7503_+	Splicing event	SLC36A4
chr1:196434430:196467638:clu_7505_+	Splicing event	SLC36A4
chr1:197915721:197919137:clu_7516_+	Splicing event	LOC113841947
chr1:197936424:197938402:clu_7518_+	Splicing event	LOC119716431
chr1:198009506:198010218:clu_3553_-	Splicing event	LOC101790444
chr1:198010482:198011280:clu_3554_-	Splicing event	LOC101790444
chr1:198011370:198012164:clu_3554_-	Splicing event	LOC101790444
chr1:198012255:198013894:clu_3554_-	Splicing event	LOC101790444
chr1:198018685:198019978:clu_3552_-	Splicing event	LOC101790444
chr1:198020071:198020922:clu_3552_-	Splicing event	LOC101790444
chr1:198021108:198022322:clu_3557_-	Splicing event	LOC101790444
chr1:198022447:198025511:clu_3558_-	Splicing event	LOC101790444
chr1:198029497:198030423:clu_3560_-	Splicing event	LOC101790444
chr1:199086841:199142042:clu_3562_-	Splicing event	TMEM135
chr1:199142134:199146587:clu_3563_-	Splicing event	TMEM135
chr1:199142134:199162221:clu_3563_-	Splicing event	TMEM135
chr1:199146714:199160958:clu_3563_-	Splicing event	TMEM135
chr1:199146714:199161063:clu_3563_-	Splicing event	TMEM135
chr1:199270638:199273771:clu_3566_-	Splicing event	PRSS23
chr1:199270638:199274453:clu_3566_-	Splicing event	PRSS23
chr1:199270638:199275410:clu_3566_-	Splicing event	PRSS23
chr1:199576976:199577058:clu_3576_-	Splicing event	LOC119716490
chr1:199577099:199577802:clu_3576_-	Splicing event	LOC119716490
chr1:199587407:199589185:clu_7545_+	Splicing event	LOC119716501
chr1:199637242:199637601:clu_3580_-	Splicing event	TMEM126A
chr1:199637242:199638320:clu_3580_-	Splicing event	TMEM126A
chr1:199637715:199638320:clu_3580_-	Splicing event	TMEM126A
chr1:199638513:199640336:clu_3581_-	Splicing event	TMEM126A
chr1:199640391:199641095:clu_3581_-	Splicing event	TMEM126A
chr1:199641219:199642027:clu_3582_-	Splicing event	TMEM126A
chr1:199641219:199642123:clu_3582_-	Splicing event	TMEM126A
chr1:199641219:199642136:clu_3582_-	Splicing event	TMEM126A
chr1:199641219:199642202:clu_3582_-	Splicing event	TMEM126A
chr1:199641219:199642252:clu_3582_-	Splicing event	TMEM126A
chr1:200336497:200348526:clu_7548_+	Splicing event	DLG2
chr1:200656172:200656701:clu_7553_+	Splicing event	DLG2
chr1:200949320:200949734:clu_3587_-	Splicing event	LOC101797257
chr1:200949906:200950845:clu_3587_-	Splicing event	LOC101797257
chr1:201074397:201074973:clu_7565_+	Splicing event	LOC101796454
chr1:201091573:201092147:clu_7566_+	Splicing event	LOC119717123
chr1:201091573:201092150:clu_7566_+	Splicing event	LOC119717123
chr1:201094790:201095446:clu_7572_+	Splicing event	LOC119717123
chr1:201142013:201143302:clu_3595_-	Splicing event	SYTL2
chr1:201142013:201144531:clu_3595_-	Splicing event	SYTL2
chr1:201143349:201144531:clu_3595_-	Splicing event	SYTL2
chr1:201145681:201147228:clu_3596_-	Splicing event	SYTL2
chr1:201153010:201154014:clu_3597_-	Splicing event	SYTL2
chr1:201153010:201154694:clu_3597_-	Splicing event	SYTL2
chr1:201154113:201154694:clu_3597_-	Splicing event	SYTL2
chr1:201175054:201187684:clu_3598_-	Splicing event	SYTL2
chr1:201175054:201187873:clu_3598_-	Splicing event	SYTL2
chr1:201175054:201187912:clu_3598_-	Splicing event	SYTL2
chr1:201342720:201342839:clu_7585_+	Splicing event	EED
chr1:201342920:201344399:clu_7585_+	Splicing event	EED
chr1:201342920:201345410:clu_7585_+	Splicing event	EED
chr1:201344490:201345410:clu_7585_+	Splicing event	EED
chr1:201345543:201346129:clu_7586_+	Splicing event	EED
chr1:201345543:201346642:clu_7586_+	Splicing event	EED
chr1:201346216:201346642:clu_7586_+	Splicing event	EED
chr1:201362992:201363988:clu_3607_-	Splicing event	HIKESHI
chr1:201368217:201368435:clu_3608_-	Splicing event	HIKESHI
chr1:201368217:201368458:clu_3608_-	Splicing event	HIKESHI
chr1:201368217:201369078:clu_3608_-	Splicing event	HIKESHI
chr1:201368566:201369078:clu_3608_-	Splicing event	HIKESHI
chr1:203660877:203661298:clu_7602_+	Splicing event	NARS2
chr1:203660877:203661303:clu_7602_+	Splicing event	NARS2
chr1:203744726:203745647:clu_7608_+	Splicing event	GAB2
chr1:203748382:203749271:clu_7610_+	Splicing event	GAB2
chr1:203780813:203786502:clu_7611_+	Splicing event	KCTD21
chr1:203794294:203794898:clu_7611_+	Splicing event	ALG8
chr1:203794976:203795925:clu_7611_+	Splicing event	ALG8
chr1:203798903:203799886:clu_7613_+	Splicing event	ALG8
chr1:203799989:203800108:clu_7613_+	Splicing event	ALG8
chr1:203800654:203800964:clu_7614_+	Splicing event	ALG8
chr1:203800654:203800998:clu_7614_+	Splicing event	ALG8
chr1:203823291:203825132:clu_7619_+	Splicing event	KCTD14
chr1:203823300:203825132:clu_7619_+	Splicing event	KCTD14
chr1:203869559:203870881:clu_3626_-	Splicing event	AAMDC
chr1:203869559:203872014:clu_3626_-	Splicing event	AAMDC
chr1:203869559:203872755:clu_3626_-	Splicing event	AAMDC
chr1:203871069:203872014:clu_3626_-	Splicing event	AAMDC
chr1:203871069:203872755:clu_3626_-	Splicing event	AAMDC
chr1:203934477:203936732:clu_7604_+	Splicing event	CLNS1A
chr1:203937402:203937542:clu_7625_+	Splicing event	CLNS1A
chr1:203940660:203944424:clu_3627_-	Splicing event	CLNS1A
chr1:203940668:203944424:clu_3627_-	Splicing event	CLNS1A
chr1:203940686:203944424:clu_3627_-	Splicing event	CLNS1A
chr1:203982871:204019712:clu_7605_+	Splicing event	PAK1
chr1:204116872:204117157:clu_3634_-	Splicing event	MYO7A
chr1:204322356:204331237:clu_3647_-	Splicing event	TSKU
chr1:204331319:204331624:clu_3647_-	Splicing event	TSKU
chr1:204331319:204332880:clu_3647_-	Splicing event	TSKU
chr1:204331319:204333700:clu_3647_-	Splicing event	TSKU
chr1:204479661:204483138:clu_7650_+	Splicing event	LRRC32
chr1:204584210:204584421:clu_3659_-	Splicing event	EMSY
chr1:204584213:204584421:clu_3659_-	Splicing event	EMSY
chr1:204585694:204586622:clu_3660_-	Splicing event	EMSY
chr1:204585694:204588291:clu_3660_-	Splicing event	EMSY
chr1:204586795:204588291:clu_3660_-	Splicing event	EMSY
chr1:204590653:204592189:clu_3658_-	Splicing event	EMSY
chr1:204590653:204594466:clu_3658_-	Splicing event	EMSY
chr1:204592338:204594466:clu_3658_-	Splicing event	EMSY
chr1:204596966:204600929:clu_3661_-	Splicing event	EMSY
chr1:204596966:204601448:clu_3661_-	Splicing event	EMSY
chr1:204601203:204601448:clu_3661_-	Splicing event	EMSY
chr1:204601707:204605000:clu_3662_-	Splicing event	EMSY
chr1:204601707:204606267:clu_3662_-	Splicing event	EMSY
chr1:204605152:204606267:clu_3662_-	Splicing event	EMSY
chr1:204606442:204608698:clu_3664_-	Splicing event	EMSY
chr1:204608772:204609387:clu_3663_-	Splicing event	EMSY
chr1:204609486:204612949:clu_3663_-	Splicing event	EMSY
chr1:204613053:204614008:clu_3665_-	Splicing event	EMSY
chr1:204613057:204614008:clu_3665_-	Splicing event	EMSY
chr1:204774294:204774379:clu_7658_+	Splicing event	WNT11
chr1:204774458:204775955:clu_7658_+	Splicing event	WNT11
chr1:204897:205367:clu_15_-	Splicing event	LOC101793578
chr1:205030650:205031505:clu_3671_-	Splicing event	DGAT2
chr1:205031612:205032328:clu_3671_-	Splicing event	DGAT2
chr1:205206342:205213181:clu_3673_-	Splicing event	GDPD5
chr1:205206342:205267450:clu_3673_-	Splicing event	GDPD5
chr1:205213284:205267450:clu_3673_-	Splicing event	GDPD5
chr1:205267624:205313386:clu_3674_-	Splicing event	GDPD5
chr1:205267624:205313451:clu_3674_-	Splicing event	GDPD5
chr1:205351754:205354136:clu_7661_+	Splicing event	SERPINH1
chr1:205351754:205354139:clu_7661_+	Splicing event	SERPINH1
chr1:205512:205792:clu_15_-	Splicing event	LOC101793578
chr1:205530158:205534408:clu_7664_+	Splicing event	P2RY2
chr1:205558593:205563434:clu_7665_+	Splicing event	P2RY6
chr1:205833383:205833717:clu_7672_+	Splicing event	MRPL48
chr1:205842691:205843696:clu_3684_-	Splicing event	LOC113844224
chr1:205842694:205843696:clu_3684_-	Splicing event	LOC113844224
chr1:205847276:205847655:clu_7662_+	Splicing event	PAAF1
chr1:205847276:205847696:clu_7662_+	Splicing event	PAAF1
chr1:205945247:205945366:clu_3702_-	Splicing event	NEU3
chr1:205945426:205946262:clu_3702_-	Splicing event	NEU3
chr1:205949466:205951141:clu_3703_-	Splicing event	SPCS2
chr1:205949466:205951576:clu_3703_-	Splicing event	SPCS2
chr1:205951335:205951576:clu_3703_-	Splicing event	SPCS2
chr1:205951335:205953814:clu_3703_-	Splicing event	SPCS2
chr1:205951377:205951576:clu_3703_-	Splicing event	SPCS2
chr1:205951805:205953814:clu_3703_-	Splicing event	SPCS2
chr1:206057:206322:clu_8_-	Splicing event	LOC101793578
chr1:206231116:206232803:clu_7678_+	Splicing event	RNF121
chr1:206240354:206240517:clu_7702_+	Splicing event	LOC119716887
chr1:206240582:206240843:clu_7702_+	Splicing event	LOC119716887
chr1:206341857:206342310:clu_7704_+	Splicing event	LOC119716862
chr1:206342348:206342436:clu_7704_+	Splicing event	LOC119716862
chr1:206394336:206394599:clu_3715_-	Splicing event	LOC119716872
chr1:206462924:206463170:clu_3750_-	Splicing event	NUP98
chr1:206463327:206463909:clu_3750_-	Splicing event	NUP98
chr1:206466717:206467458:clu_3751_-	Splicing event	NUP98
chr1:206467634:206467722:clu_3751_-	Splicing event	NUP98
chr1:206467634:206471584:clu_3751_-	Splicing event	NUP98
chr1:206497071:206502409:clu_7732_+	Splicing event	PGAP2
chr1:206497083:206502409:clu_7732_+	Splicing event	PGAP2
chr1:206519:206827:clu_9_-	Splicing event	LOC101793578
chr1:207005726:207008422:clu_3754_-	Splicing event	LOC113844796
chr1:207022036:207022145:clu_3772_-	Splicing event	APBB1
chr1:207022228:207022476:clu_3772_-	Splicing event	APBB1
chr1:207022560:207022688:clu_3773_-	Splicing event	APBB1
chr1:207022560:207022700:clu_3773_-	Splicing event	APBB1
chr1:207022802:207023342:clu_3774_-	Splicing event	APBB1
chr1:207023469:207023600:clu_3774_-	Splicing event	APBB1
chr1:207026702:207027081:clu_3775_-	Splicing event	APBB1
chr1:207082826:207085762:clu_3782_-	Splicing event	RRP8
chr1:207082826:207085807:clu_3782_-	Splicing event	RRP8
chr1:207085932:207087628:clu_3783_-	Splicing event	RRP8
chr1:207088133:207088342:clu_3783_-	Splicing event	RRP8
chr1:207090917:207091975:clu_7748_+	Splicing event	ILK
chr1:207091124:207091975:clu_7748_+	Splicing event	ILK
chr1:207091249:207091975:clu_7748_+	Splicing event	ILK
chr1:207091840:207091975:clu_7748_+	Splicing event	ILK
chr1:207100345:207100568:clu_3778_-	Splicing event	TPP1
chr1:207186352:207189762:clu_3792_-	Splicing event	DCHS1
chr1:207196367:207198114:clu_7754_+	Splicing event	LCMT2
chr1:207198204:207200467:clu_7754_+	Splicing event	LCMT2
chr1:207203743:207207507:clu_7756_+	Splicing event	LCMT2
chr1:207203743:207207785:clu_7756_+	Splicing event	LCMT2
chr1:207207694:207207785:clu_7756_+	Splicing event	LCMT2
chr1:207207920:207211549:clu_7756_+	Splicing event	LCMT2
chr1:21117268:21127287:clu_4184_+	Splicing event	TRABD
chr1:21139444:21141657:clu_4186_+	Splicing event	TRABD
chr1:21141829:21143316:clu_4186_+	Splicing event	TRABD
chr1:21161246:21164306:clu_4187_+	Splicing event	SELENOO
chr1:21161246:21164573:clu_4187_+	Splicing event	SELENOO
chr1:21161246:21165050:clu_4187_+	Splicing event	SELENOO
chr1:21164703:21165050:clu_4187_+	Splicing event	SELENOO
chr1:21193513:21194526:clu_382_-	Splicing event	TUBGCP6
chr1:21194667:21195611:clu_382_-	Splicing event	TUBGCP6
chr1:21209485:21209750:clu_388_-	Splicing event	TUBGCP6
chr1:21213430:21214069:clu_389_-	Splicing event	HDAC10
chr1:21214254:21214624:clu_389_-	Splicing event	HDAC10
chr1:21214708:21216865:clu_389_-	Splicing event	HDAC10
chr1:21220035:21220535:clu_390_-	Splicing event	HDAC10
chr1:21220602:21221730:clu_390_-	Splicing event	HDAC10
chr1:21221836:21222322:clu_391_-	Splicing event	HDAC10
chr1:21221836:21223024:clu_391_-	Splicing event	HDAC10
chr1:21222408:21223024:clu_391_-	Splicing event	HDAC10
chr1:21256037:21258018:clu_398_-	Splicing event	MAPK12
chr1:21265374:21271098:clu_400_-	Splicing event	MAPK12
chr1:21498206:21510683:clu_403_-	Splicing event	PLXNB2
chr1:21560018:21640682:clu_404_-	Splicing event	PLXNB2
chr1:21630469:21640682:clu_404_-	Splicing event	PLXNB2
chr1:21630472:21640682:clu_404_-	Splicing event	PLXNB2
chr1:21785983:21787296:clu_4191_+	Splicing event	ZNF800
chr1:22819474:22826659:clu_4200_+	Splicing event	POT1
chr1:22827625:22828673:clu_4201_+	Splicing event	POT1
chr1:23441911:23442254:clu_4208_+	Splicing event	NDUFA5
chr1:23926474:23933691:clu_4222_+	Splicing event	CADPS2
chr1:23954515:23973545:clu_4224_+	Splicing event	CADPS2
chr1:24018179:24018681:clu_4228_+	Splicing event	AASS
chr1:24018826:24019925:clu_4229_+	Splicing event	AASS
chr1:24018826:24026793:clu_4229_+	Splicing event	AASS
chr1:24026284:24026793:clu_4229_+	Splicing event	AASS
chr1:2432796:2438107:clu_3870_+	Splicing event	CHCHD3
chr1:24482687:24482949:clu_421_-	Splicing event	CPED1
chr1:24483169:24491478:clu_421_-	Splicing event	CPED1
chr1:24491614:24498205:clu_422_-	Splicing event	CPED1
chr1:24498322:24541215:clu_422_-	Splicing event	CPED1
chr1:24543627:24545468:clu_423_-	Splicing event	CPED1
chr1:24545917:24548200:clu_424_-	Splicing event	CPED1
chr1:24545917:24550244:clu_424_-	Splicing event	CPED1
chr1:24550413:24551717:clu_424_-	Splicing event	CPED1
chr1:24556784:24569107:clu_425_-	Splicing event	CPED1
chr1:24570661:24582857:clu_426_-	Splicing event	CPED1
chr1:24584918:24609576:clu_427_-	Splicing event	CPED1
chr1:24620488:24620968:clu_428_-	Splicing event	CPED1
chr1:24642830:24643977:clu_429_-	Splicing event	ING3
chr1:24644167:24644511:clu_429_-	Splicing event	ING3
chr1:24644569:24645824:clu_430_-	Splicing event	ING3
chr1:24644668:24645824:clu_430_-	Splicing event	ING3
chr1:24651688:24651853:clu_433_-	Splicing event	ING3
chr1:24651688:24655508:clu_433_-	Splicing event	ING3
chr1:24695445:24715736:clu_4237_+	Splicing event	TSPAN12
chr1:24711551:24711699:clu_4237_+	Splicing event	TSPAN12
chr1:24711551:24715736:clu_4237_+	Splicing event	TSPAN12
chr1:24713724:24715736:clu_4237_+	Splicing event	TSPAN12
chr1:24715843:24719056:clu_4238_+	Splicing event	TSPAN12
chr1:25752337:25752759:clu_441_-	Splicing event	LOC101800968
chr1:25752871:25753686:clu_441_-	Splicing event	LOC101800968
chr1:25753820:25755218:clu_437_-	Splicing event	LOC101800968
chr1:25758136:25759914:clu_442_-	Splicing event	LOC101800968
chr1:25760870:25762056:clu_442_-	Splicing event	LOC101800968
chr1:25766004:25770361:clu_445_-	Splicing event	LOC101800968
chr1:25770516:25771317:clu_445_-	Splicing event	LOC101800968
chr1:25771552:25772442:clu_446_-	Splicing event	LOC101800968
chr1:25771552:25775400:clu_446_-	Splicing event	LOC101800968
chr1:25773359:25775400:clu_446_-	Splicing event	LOC101800968
chr1:25775485:25777828:clu_438_-	Splicing event	LOC101800968
chr1:25777872:25777963:clu_438_-	Splicing event	LOC101800968
chr1:25784797:25786364:clu_439_-	Splicing event	LOC101800968
chr1:25786433:25786517:clu_440_-	Splicing event	LOC101800968
chr1:25786436:25786517:clu_440_-	Splicing event	LOC101800968
chr1:25786550:25791429:clu_439_-	Splicing event	LOC101800968
chr1:26249012:26249571:clu_454_-	Splicing event	ST7
chr1:26249707:26250621:clu_454_-	Splicing event	ST7
chr1:26274650:26275806:clu_455_-	Splicing event	ST7
chr1:26594516:26602801:clu_463_-	Splicing event	CAV2
chr1:26594516:26603082:clu_463_-	Splicing event	CAV2
chr1:26602988:26603082:clu_463_-	Splicing event	CAV2
chr1:27340808:27363754:clu_468_-	Splicing event	MDFIC
chr1:27363885:27374662:clu_468_-	Splicing event	MDFIC
chr1:27374817:27376856:clu_469_-	Splicing event	MDFIC
chr1:27503289:27504125:clu_470_-	Splicing event	FOXP2
chr1:27504194:27505499:clu_470_-	Splicing event	FOXP2
chr1:27535382:27536881:clu_474_-	Splicing event	FOXP2
chr1:27537078:27538248:clu_474_-	Splicing event	FOXP2
chr1:27538385:27603258:clu_471_-	Splicing event	FOXP2
chr1:27672625:27684308:clu_472_-	Splicing event	FOXP2
chr1:27685819:27700083:clu_4258_+	Splicing event	LOC106014339
chr1:28388193:28399616:clu_4264_+	Splicing event	BMT2
chr1:28409713:28414586:clu_4266_+	Splicing event	BMT2
chr1:28414700:28419660:clu_4266_+	Splicing event	BMT2
chr1:28533957:28537085:clu_478_-	Splicing event	LSMEM1
chr1:28598781:28600145:clu_479_-	Splicing event	ZNF277
chr1:28600241:28601381:clu_479_-	Splicing event	ZNF277
chr1:28601448:28608169:clu_481_-	Splicing event	ZNF277
chr1:28608301:28611523:clu_481_-	Splicing event	ZNF277
chr1:28611633:28612999:clu_481_-	Splicing event	ZNF277
chr1:28613090:28625495:clu_481_-	Splicing event	ZNF277
chr1:28630823:28649926:clu_484_-	Splicing event	ZNF277
chr1:28630823:28652098:clu_484_-	Splicing event	ZNF277
chr1:28816166:28816882:clu_4271_+	Splicing event	DOCK4
chr1:28886177:28886684:clu_4279_+	Splicing event	DOCK4
chr1:28886765:28887000:clu_4279_+	Splicing event	DOCK4
chr1:28887109:28888228:clu_4279_+	Splicing event	DOCK4
chr1:28888395:28890506:clu_4279_+	Splicing event	DOCK4
chr1:28894236:28897248:clu_4280_+	Splicing event	DOCK4
chr1:29280091:29377641:clu_4282_+	Splicing event	IMMP2L
chr1:30114598:30117362:clu_486_-	Splicing event	DNAJB9
chr1:30197331:30197491:clu_4286_+	Splicing event	PNPLA8
chr1:30197335:30197491:clu_4286_+	Splicing event	PNPLA8
chr1:30197367:30197491:clu_4286_+	Splicing event	PNPLA8
chr1:30197367:30198024:clu_4286_+	Splicing event	PNPLA8
chr1:30197585:30198024:clu_4286_+	Splicing event	PNPLA8
chr1:30197585:30198138:clu_4286_+	Splicing event	PNPLA8
chr1:30197585:30198384:clu_4286_+	Splicing event	PNPLA8
chr1:30198096:30198384:clu_4286_+	Splicing event	PNPLA8
chr1:30332174:30336871:clu_4290_+	Splicing event	NRCAM
chr1:30340834:30343376:clu_4291_+	Splicing event	NRCAM
chr1:30370345:30385035:clu_4293_+	Splicing event	NRCAM
chr1:30387773:30397381:clu_4294_+	Splicing event	NRCAM
chr1:31165911:31175826:clu_487_-	Splicing event	GXYLT1
chr1:31165911:31183612:clu_487_-	Splicing event	GXYLT1
chr1:31175918:31183612:clu_487_-	Splicing event	GXYLT1
chr1:31261991:31262849:clu_489_-	Splicing event	ZCRB1
chr1:31261994:31262849:clu_489_-	Splicing event	ZCRB1
chr1:31282173:31301563:clu_4307_+	Splicing event	PPHLN1
chr1:31301777:31306023:clu_4307_+	Splicing event	PPHLN1
chr1:31301819:31306023:clu_4307_+	Splicing event	PPHLN1
chr1:31789597:31790585:clu_502_-	Splicing event	PUS7L
chr1:31789611:31790585:clu_502_-	Splicing event	PUS7L
chr1:31791768:31792081:clu_4308_+	Splicing event	IRAK4
chr1:31792226:31792546:clu_4308_+	Splicing event	IRAK4
chr1:31792226:31792593:clu_4308_+	Splicing event	IRAK4
chr1:31793461:31794674:clu_4309_+	Splicing event	IRAK4
chr1:31793461:31795040:clu_4309_+	Splicing event	IRAK4
chr1:31794738:31795040:clu_4309_+	Splicing event	IRAK4
chr1:31797319:31798166:clu_4310_+	Splicing event	IRAK4
chr1:31797319:31799618:clu_4310_+	Splicing event	IRAK4
chr1:31798237:31799618:clu_4310_+	Splicing event	IRAK4
chr1:31799801:31800667:clu_4310_+	Splicing event	IRAK4
chr1:31820196:31822586:clu_504_-	Splicing event	TWF1
chr1:31822663:31826930:clu_504_-	Splicing event	TWF1
chr1:32498153:32498560:clu_516_-	Splicing event	LOC106017421
chr1:32498153:32498562:clu_516_-	Splicing event	LOC106017421
chr1:32498153:32498980:clu_516_-	Splicing event	LOC106017421
chr1:32498153:32498985:clu_516_-	Splicing event	LOC106017421
chr1:32498153:32499039:clu_516_-	Splicing event	LOC106017421
chr1:32745799:32747277:clu_518_-	Splicing event	SLC38A2
chr1:32745799:32747880:clu_518_-	Splicing event	SLC38A2
chr1:32745799:32748850:clu_518_-	Splicing event	SLC38A2
chr1:32747973:32748850:clu_518_-	Splicing event	SLC38A2
chr1:32752493:32752709:clu_522_-	Splicing event	SLC38A2
chr1:32752893:32753383:clu_522_-	Splicing event	SLC38A2
chr1:32753889:32754782:clu_4330_+	Splicing event	LOC110352979
chr1:32863353:32864316:clu_519_-	Splicing event	SLC38A4
chr1:32863627:32864316:clu_519_-	Splicing event	SLC38A4
chr1:32873829:32877907:clu_520_-	Splicing event	SLC38A4
chr1:32873834:32875328:clu_520_-	Splicing event	SLC38A4
[truncated: 64,030 more rows]
