# Supplementary material for: Mapping multitissue regulatory variants reveals a liver-centric coexpression network associated with duck egg-laying performance
Source: HighWire-hosted journal article supplement (doi:10.1101/gr.280345.124), 2025-09-10
Supplement: Supplemental_Table_S4.xlsx [file Supplemental_Table_S4.xlsx]

## Sheet: Sheet1
Supplemental Table S4. The significant molecular phenotypes associated with the total egg production by TWAS.
Molecular.Phenotype	Annotated.Gene	Type	Tissue	Slope	P.value	FDR
BTBD19	BTBD19	Gene_Expression	Liver	-0.934718	1.12e-07	0.000539095
LOC110354773	LOC110354773	Gene_Expression	Liver	-0.750158	7.01e-11	1.01e-06
SFTPC	SFTPC	Gene_Expression	Liver	-0.680892	1.53e-10	1.1e-06
CSRNP3	CSRNP3	Gene_Expression	Ovary	-0.623048	1.33e-06	0.0068569
DPY19L1	DPY19L1	Gene_Expression	Ovary	-1.5683	5.53e-06	0.0163118
HSPB2	HSPB2	Gene_Expression	Ovary	0.52192	6.71e-06	0.0173175
LOC101798009	LOC101798009	Gene_Expression	Ovary	-1.31867	1.99e-05	0.0369156
LOC113842419	LOC113842419	Gene_Expression	Ovary	-0.565956	2.9e-05	0.0427869
LOC119714313	LOC119714313	Gene_Expression	Ovary	-0.702665	9.38e-07	0.0064549
LRRC18	LRRC18	Gene_Expression	Ovary	-0.634749	2.15e-05	0.0369156
NEU4	NEU4	Gene_Expression	Ovary	-0.785459	4.96e-06	0.0163118
NMU	NMU	Gene_Expression	Ovary	0.310651	2.54e-05	0.0403105
PEDS1	PEDS1	Gene_Expression	Ovary	-1.07246	3.47e-05	0.0477062
RHOQ	RHOQ	Gene_Expression	Ovary	-0.799555	1.5e-05	0.0309404
SLC2A3	SLC2A3	Gene_Expression	Ovary	-0.944006	4.18e-06	0.0163118
TMEM181	TMEM181	Gene_Expression	Ovary	-0.638043	5.38e-07	0.00555095
TSPAN8	TSPAN8	Gene_Expression	Ovary	0.452709	6.34e-09	0.000130858
TTC38	TTC38	Gene_Expression	Ovary	-0.738754	1.28e-05	0.0294684
ACAT1	ACAT1	Gene_Expression	Shellgland	-0.87712	2.41988e-07	0.00133206
AGXT2	AGXT2	Gene_Expression	Shellgland	-0.515089	5.16218e-09	4.26241e-05
ATP10B	ATP10B	Gene_Expression	Shellgland	-0.620372	0.000107626	0.0403941
ATP8A2	ATP8A2	Gene_Expression	Shellgland	-0.408785	0.000103559	0.0403941
BARX2	BARX2	Gene_Expression	Shellgland	0.424718	7.60277e-05	0.0348756
CDH11	CDH11	Gene_Expression	Shellgland	-0.37275	9.54308e-06	0.0121534
CDX1	CDX1	Gene_Expression	Shellgland	-0.43029	3.88061e-05	0.0291293
CLCN6	CLCN6	Gene_Expression	Shellgland	-0.679113	0.000129043	0.044396
CRISPLD1	CRISPLD1	Gene_Expression	Shellgland	-0.590087	0.000113127	0.0405352
EPCAM	EPCAM	Gene_Expression	Shellgland	0.664074	0.000146944	0.0475812
FAM13A	FAM13A	Gene_Expression	Shellgland	-0.529552	1.19486e-05	0.0140942
FOXO3	FOXO3	Gene_Expression	Shellgland	-0.549557	0.000134152	0.0452119
FRRS1L	FRRS1L	Gene_Expression	Shellgland	-1.00462	9.66242e-05	0.0398913
GADD45G	GADD45G	Gene_Expression	Shellgland	-0.362545	6.57586e-05	0.0334788
GFUS	GFUS	Gene_Expression	Shellgland	0.810366	7.4631e-05	0.0348756
GRIN3A	GRIN3A	Gene_Expression	Shellgland	-0.26043	0.000115366	0.0405352
GTF3C3	GTF3C3	Gene_Expression	Shellgland	-0.995874	5.14445e-05	0.0334788
ITIH2	ITIH2	Gene_Expression	Shellgland	-1.02271	2.87502e-05	0.0237391
KLF15	KLF15	Gene_Expression	Shellgland	-0.441409	5.61126e-05	0.0334788
LINGO2	LINGO2	Gene_Expression	Shellgland	-1.45762	3.14851e-06	0.00642823
LOC101790837	LOC101790837	Gene_Expression	Shellgland	-0.5845	0.000114581	0.0405352
LOC101791081	LOC101791081	Gene_Expression	Shellgland	-0.397399	5.37756e-05	0.0334788
LOC101795007	LOC101795007	Gene_Expression	Shellgland	-0.776292	3.50333e-06	0.00642823
LOC101797182	LOC101797182	Gene_Expression	Shellgland	0.396155	0.000105757	0.0403941
LOC101798820	LOC101798820	Gene_Expression	Shellgland	0.378806	0.000156927	0.0486456
LOC110354391	LOC110354391	Gene_Expression	Shellgland	0.73544	0.000158632	0.0486456
LOC113843063	LOC113843063	Gene_Expression	Shellgland	-0.812913	0.000159069	0.0486456
LOC119714503	LOC119714503	Gene_Expression	Shellgland	-0.719552	6.23472e-05	0.0334788
LOC119717159	LOC119717159	Gene_Expression	Shellgland	-0.675917	1.63014e-05	0.0168251
LRIG3	LRIG3	Gene_Expression	Shellgland	-0.565118	3.85054e-05	0.0291293
MCRIP2	MCRIP2	Gene_Expression	Shellgland	-0.693978	7.58693e-05	0.0348756
MFSD6	MFSD6	Gene_Expression	Shellgland	0.727567	0.000143092	0.0472605
NAF1	NAF1	Gene_Expression	Shellgland	-1.02631	5.46611e-07	0.00180535
NDUFAF5	NDUFAF5	Gene_Expression	Shellgland	-0.831048	6.69009e-05	0.0334788
P2RX4	P2RX4	Gene_Expression	Shellgland	0.587749	2.73364e-05	0.0237391
PANK1	PANK1	Gene_Expression	Shellgland	-0.759288	7.54659e-06	0.0113295
PID1	PID1	Gene_Expression	Shellgland	-0.550039	6.4721e-05	0.0334788
POGZ	POGZ	Gene_Expression	Shellgland	-1.277	1.90099e-05	0.0184664
RERGL	RERGL	Gene_Expression	Shellgland	-0.436521	9.56727e-06	0.0121534
RHOV	RHOV	Gene_Expression	Shellgland	0.518718	6.33728e-05	0.0334788
RIMBP2	RIMBP2	Gene_Expression	Shellgland	-0.367297	1.45374e-09	2.4007e-05
RNF34	RNF34	Gene_Expression	Shellgland	-0.976837	9.50506e-05	0.0398913
SH3GL2	SH3GL2	Gene_Expression	Shellgland	-0.42284	5.29636e-05	0.0334788
SLITRK2	SLITRK2	Gene_Expression	Shellgland	-1.25364	7.08359e-06	0.0113295
SOCS1	SOCS1	Gene_Expression	Shellgland	-0.411926	4.44915e-05	0.0319449
STMP1	STMP1	Gene_Expression	Shellgland	0.551292	9.26047e-05	0.0398913
TAF1D	TAF1D	Gene_Expression	Shellgland	-0.893927	2.02607e-05	0.0185881
TBXT	TBXT	Gene_Expression	Shellgland	0.309405	0.000101639	0.0403941
TMEM125	TMEM125	Gene_Expression	Shellgland	0.743538	1.47241e-06	0.00347363
TMPRSS4	TMPRSS4	Gene_Expression	Shellgland	0.430397	6.11088e-05	0.0334788
WDR41	WDR41	Gene_Expression	Shellgland	-0.441983	3.97647e-07	0.00164169
WDR43	WDR43	Gene_Expression	Shellgland	0.512643	9.06093e-05	0.0398913
ZNF592	ZNF592	Gene_Expression	Shellgland	-0.910087	1.54851e-05	0.0168251
ZXDC	ZXDC	Gene_Expression	Shellgland	-1.68285	1.36803e-06	0.00347363
chr3:29563085:29620718:clu_34193_-	SMYD3	AS	Shellgland	0.33848	2.1474e-06	0.0429791
chr13:17125684:17151128:clu_13523_+	ATP2B2	AS	Shellgland	-0.429106	2.62043e-06	0.0429791
XM_038166115.1|PKIG|chr21|+	PKIG	3'APA	Ovary	-11.5217	6.42114e-06	0.0398817
XM_038182295.1|SLC35A5|chr1|-	SLC35A5	3'APA	Shellgland	-2.92871	4.44472e-06	0.0154543
XM_027456564.2|CAMK2D|chr4|+	CAMK2D	3'APA	Shellgland	148.275	3.81845e-08	0.000265535
XM_027459883.2|COL17A1|chr6|-	COL17A1	3'APA	Shellgland	-2.17758	9.36296e-06	0.0169892
XM_038183177.1|GADD45A|chr8|+	GADD45A	3'APA	Shellgland	-2.10748	1.4601e-05	0.0203071
XR_005260481.1|C21H20orf96|chr21|+	C21H20orf96	3'APA	Shellgland	3.60126	9.77234e-06	0.0169892
