# Supplementary material for: Mapping multitissue regulatory variants reveals a liver-centric coexpression network associated with duck egg-laying performance
Source: HighWire-hosted journal article supplement (doi:10.1101/gr.280345.124), 2025-09-10
Supplement: Supplemental_Table_S5.xlsx [file Supplemental_Table_S5.xlsx]

## Sheet: Sheet1
Supplemental Table S5. The number of eGenes, sGenes and apaGenes in different tissues.
Tissue	eGene Number	sGene Number	apaGene Number
Liver	2519	2011	1866
Ovary	9903	4466	3122
Shell gland	4792	3393	3040
Spleen	7703	3774	3037
