# Supplementary material for: Mapping multitissue regulatory variants reveals a liver-centric coexpression network associated with duck egg-laying performance
Source: HighWire-hosted journal article supplement (doi:10.1101/gr.280345.124), 2025-09-10
Supplement: Supplemental_Table_S6.xlsx [file Supplemental_Table_S6.xlsx]

## Sheet: Sheet1
Supplemental Table S6. The summary of potential causal molQTL fine-mapped by SuSIE.
phenotype_id	variant_id	pip	AF	cs_id	Tissue	QTL_type
LOC101793761	1_308565	0.972083	0.25	1	Liver	eQTL
LOC101795648	1_164486	0.98163	0.0661157	1	Liver	eQTL
LOC101795648	1_241904	0.988557	0.485043	2	Liver	eQTL
LOC119713274	1_597804	0.999627	0.196121	1	Liver	eQTL
LOC119713274	1_507218	0.977588	0.190678	2	Liver	eQTL
SMKR1	1_1168700	0.999994	0.0523013	1	Liver	eQTL
SMKR1	1_1147927	1	0.0381356	2	Liver	eQTL
LOC119718463	1_1162295	0.999982	0.341202	1	Liver	eQTL
MEST	1_1392108	1	0.463519	1	Liver	eQTL
LOC119715563	1_1481682	0.99995	0.207265	1	Liver	eQTL
MKLN1	1_3361462	0.993453	0.451477	1	Liver	eQTL
DHTKD1	1_6543416	0.927013	0.0673469	1	Liver	eQTL
TMEM243	1_7590799	0.978961	0.0462185	1	Liver	eQTL
ELAPOR2	1_7554451	0.940571	0.056962	2	Liver	eQTL
LOC106015179	1_12791545	0.952059	0.268085	1	Liver	eQTL
PSMC2	1_12896175	0.980367	0.25	1	Liver	eQTL
COG5	1_14798033	0.982866	0.342672	1	Liver	eQTL
LOC106018431	1_15062953	0.999858	0.0420168	1	Liver	eQTL
LOC113843801	1_17150210	0.999981	0.412017	1	Liver	eQTL
LOC113843801	1_16937728	0.980555	0.275641	2	Liver	eQTL
CAV2	1_26573552	0.999843	0.209205	1	Liver	eQTL
LOC106014339	1_27778980	0.999393	0.207792	1	Liver	eQTL
LOC110352979	1_32745957	0.923902	0.465957	1	Liver	eQTL
SLC35E3	1_37475285	0.997834	0.353191	1	Liver	eQTL
SLC35E3	1_37429054	0.991104	0.245727	2	Liver	eQTL
MDM2	1_37438153	0.999901	0.163136	1	Liver	eQTL
MDM2	1_37910255	0.986464	0.0311203	2	Liver	eQTL
LYZ	1_37561484	0.999974	0.387234	1	Liver	eQTL
LOC119715523	1_37571237	0.999997	0.161088	1	Liver	eQTL
CCDC107	1_39917785	0.999235	0.365145	1	Liver	eQTL
LOC113843352	1_40246425	0.999963	0.0914634	1	Liver	eQTL
LOC119715811	1_40017418	0.975231	0.0699588	2	Liver	eQTL
NAP1L1	1_40143275	0.999509	0.403017	1	Liver	eQTL
LOC106019781	1_42496255	0.959002	0.265086	1	Liver	eQTL
CSDC2	1_42697253	0.999657	0.0975104	1	Liver	eQTL
DESI1	1_42682073	0.993566	0.0699588	1	Liver	eQTL
CENPM	1_42767091	0.980886	0.485169	1	Liver	eQTL
LOC101804496	1_42819105	0.957372	0.236842	1	Liver	eQTL
SERHL2	1_43007284	0.999545	0.434874	1	Liver	eQTL
LOC119714235	1_43079965	0.999937	0.122845	1	Liver	eQTL
GUCY2C	1_44107271	0.999776	0.0386266	2	Liver	eQTL
HEBP1	1_43983305	0.995037	0.0617284	1	Liver	eQTL
LOC101796082	1_44167021	0.998274	0.319149	1	Liver	eQTL
LOC101797338	1_44429940	0.995453	0.0360169	1	Liver	eQTL
LOC113843064	1_44063299	0.984167	0.206751	2	Liver	eQTL
PDE6H	1_44363887	1	0.0308642	1	Liver	eQTL
PDE6H	1_44868488	0.996245	0.0493827	2	Liver	eQTL
LTA4H	1_46670264	0.980417	0.14346	2	Liver	eQTL
AMDHD1	1_46642667	0.961699	0.133603	1	Liver	eQTL
MRPL42	1_47501564	0.999704	0.063786	3	Liver	eQTL
ACSS3	1_52665522	0.999997	0.294372	1	Liver	eQTL
ST13	1_52320166	0.997043	0.041841	1	Liver	eQTL
LOC119715669	1_52535904	0.998625	0.0378151	2	Liver	eQTL
RPS19BP1	1_53608597	0.999999	0.255411	1	Liver	eQTL
PLA2G6	1_54016062	0.98377	0.21519	1	Liver	eQTL
BAIAP2L2	1_54045180	0.999441	0.0288066	1	Liver	eQTL
NOL12	1_54157086	0.998517	0.482833	1	Liver	eQTL
CDC42EP1	1_54201668	1	0.42161	1	Liver	eQTL
C1H12orf73	1_57690902	0.998836	0.47234	1	Liver	eQTL
C1H12orf73	1_57648821	0.974448	0.377637	2	Liver	eQTL
LOC113842368	1_57808216	0.957646	0.43319	1	Liver	eQTL
LOC101794316	1_58833071	0.95577	0.168776	1	Liver	eQTL
LOC119718537	1_58647743	0.998353	0.0271967	1	Liver	eQTL
LOC119718537	1_58705351	0.995011	0.107759	2	Liver	eQTL
LOC119717141	1_58507440	0.99888	0.29249	1	Liver	eQTL
LOC119717141	1_58530550	0.978821	0.0286885	2	Liver	eQTL
SVOPL	1_59571162	1	0.0245902	1	Liver	eQTL
SVOPL	1_60511018	1	0.0550847	2	Liver	eQTL
LOC101797243	1_59791293	0.909593	0.118143	1	Liver	eQTL
LOC119714590	1_60012826	0.994498	0.095339	1	Liver	eQTL
SLC37A3	1_59940936	0.971207	0.235417	1	Liver	eQTL
RAB19	1_59956701	0.98954	0.479079	1	Liver	eQTL
MKRN1	1_59970622	0.976886	0.292531	1	Liver	eQTL
STMP1	1_61559818	0.934644	0.374459	2	Liver	eQTL
LOC106017297	1_62051529	0.999908	0.0619835	1	Liver	eQTL
ADIPOR2	1_64171071	0.999688	0.315678	1	Liver	eQTL
HDHD5	1_64879164	0.986289	0.339662	1	Liver	eQTL
PEX26	1_65334944	0.992735	0.183333	1	Liver	eQTL
LOC119717352	1_65472789	0.954513	0.193133	1	Liver	eQTL
LOC119717347	1_65141530	0.996819	0.0679012	2	Liver	eQTL
LOC113839621	1_65475541	0.986906	0.126033	1	Liver	eQTL
LOC110353359	1_77098732	0.988745	0.240506	1	Liver	eQTL
LOC101799801	1_77217481	0.978076	0.103306	2	Liver	eQTL
STYK1	1_79223304	0.939281	0.448936	1	Liver	eQTL
NECAP1	1_80471241	0.970433	0.230453	1	Liver	eQTL
NECAP1	1_80640554	0.975949	0.229614	2	Liver	eQTL
LOC119717054	1_81053001	0.950716	0.101695	1	Liver	eQTL
LOC119717042	1_80176626	0.98718	0.163136	2	Liver	eQTL
LOC119717021	1_80177549	0.999995	0.160338	1	Liver	eQTL
LOC119717062	1_79989757	0.999436	0.437238	1	Liver	eQTL
LOC119717062	1_79927654	0.999967	0.0402542	2	Liver	eQTL
LOC113841770	1_81087852	0.986622	0.0779221	2	Liver	eQTL
LOC101803599	1_80100134	0.975454	0.214286	1	Liver	eQTL
ITFG2	1_80516563	0.999833	0.41087	1	Liver	eQTL
ITFG2	1_80463361	0.993476	0.205128	2	Liver	eQTL
C1H12orf57	1_82117247	0.999975	0.338983	1	Liver	eQTL
COPS7A	1_82261762	0.976986	0.208861	1	Liver	eQTL
LOC113842421	1_82468263	0.953914	0.463115	1	Liver	eQTL
MRPL51	1_82482257	0.940765	0.145652	1	Liver	eQTL
FAM162A	1_82596521	0.947975	0.45339	1	Liver	eQTL
LOC110353930	1_84099090	0.995999	0.0295359	1	Liver	eQTL
ATP6V1A	1_83809358	0.971461	0.397826	1	Liver	eQTL
METTL16	1_83941007	0.971879	0.135417	1	Liver	eQTL
SLC22A15	1_84920122	0.999843	0.153846	1	Liver	eQTL
B4GALT4	1_85172592	0.977805	0.470085	1	Liver	eQTL
GRAMD1C	1_87470107	0.999995	0.0690377	1	Liver	eQTL
GRAMD1C	1_87490701	0.984879	0.162393	2	Liver	eQTL
LOC106017354	1_87518487	0.999991	0.0765957	1	Liver	eQTL
CLDND1	1_87548644	0.992231	0.0574468	1	Liver	eQTL
CFAP44	1_88052449	1	0.10166	1	Liver	eQTL
LOC101789696	1_87745618	0.971724	0.0211864	1	Liver	eQTL
BLZF1	1_88034377	1	0.169528	1	Liver	eQTL
LOC110354432	1_88472475	0.964937	0.38412	1	Liver	eQTL
TIPRL	1_88410869	0.952795	0.45279	1	Liver	eQTL
LOC101804931	1_92068865	0.924841	0.353814	2	Liver	eQTL
LOC113842386	1_92069963	0.996049	0.0650407	2	Liver	eQTL
LOC119717644	1_92165909	0.996877	0.221757	1	Liver	eQTL
ABHD10	1_93272509	0.996819	0.461702	1	Liver	eQTL
LOC101800605	1_93384106	0.934294	0.03	1	Liver	eQTL
LOC113842374	1_93385528	0.999999	0.211694	1	Liver	eQTL
ARL13B	1_95044177	0.983167	0.268085	1	Liver	eQTL
NSUN3	1_94561660	0.969977	0.129787	1	Liver	eQTL
ILDR2	1_96490021	0.982164	0.325532	1	Liver	eQTL
LOC119717949	1_97213308	0.998379	0.281376	1	Liver	eQTL
LOC110352331	1_96289004	0.951363	0.123932	1	Liver	eQTL
TIMMDC1	1_97011152	0.999902	0.457447	1	Liver	eQTL
TIMMDC1	1_97000552	0.999834	0.465957	2	Liver	eQTL
GPR89B	1_97045915	0.981176	0.351931	1	Liver	eQTL
HTR1F	1_97531700	0.920601	0.0714286	1	Liver	eQTL
HTR1F	1_98291844	0.999985	0.0598291	2	Liver	eQTL
LOC106019573	1_100180225	0.999249	0.116525	1	Liver	eQTL
LOC113841090	1_100411942	0.999997	0.363813	1	Liver	eQTL
LOC113840690	1_100408097	0.916481	0.341797	1	Liver	eQTL
LOC119718151	1_100408282	0.999999	0.470817	1	Liver	eQTL
LOC119716331	1_100411942	0.953975	0.363813	1	Liver	eQTL
LOC101794339	1_102155859	0.986218	0.150862	1	Liver	eQTL
LOC119713084	1_105210236	0.978476	0.0578512	1	Liver	eQTL
N6AMT1	1_109150192	0.982938	0.215768	1	Liver	eQTL
CRYZL1	1_110672942	0.999841	0.366109	1	Liver	eQTL
LOC101794661	1_111894322	0.950362	0.429487	1	Liver	eQTL
LOC101794661	1_111893390	0.944085	0.391026	2	Liver	eQTL
SIM2	1_112374526	0.999832	0.0717213	1	Liver	eQTL
LCA5L	1_112596706	0.981896	0.0967078	2	Liver	eQTL
IGSF5	1_113462775	0.982792	0.19181	1	Liver	eQTL
MBTPS2	1_114543637	0.995723	0.122845	1	Liver	eQTL
FUNDC1	1_123388920	0.976623	0.212185	1	Liver	eQTL
CCDC12	1_123824736	0.925823	0.410638	1	Liver	eQTL
GATD3A	1_124377936	0.981342	0.256356	1	Liver	eQTL
LOC110353984	1_125473549	0.995142	0.0319149	1	Liver	eQTL
LOC110353984	1_124815484	0.999994	0.052521	2	Liver	eQTL
NDUFV3	1_125065914	0.994478	0.432489	1	Liver	eQTL
LOC113842844	1_126252758	0.971894	0.0294118	1	Liver	eQTL
EIF1AX	1_126142908	0.995689	0.348485	1	Liver	eQTL
LOC106015316	1_126239446	0.945114	0.0326531	1	Liver	eQTL
AP1S2	1_128800872	0.992341	0.0311203	2	Liver	eQTL
LOC113841287	1_128252219	0.929674	0.088843	1	Liver	eQTL
LOC101800311	1_131619267	1	0.0309917	1	Liver	eQTL
LOC101800311	1_131641661	0.997153	0.0371901	2	Liver	eQTL
STS	1_132755896	0.957462	0.17234	2	Liver	eQTL
GYG2	1_134842878	0.942927	0.385776	1	Liver	eQTL
PLCXD1	1_137028457	0.987734	0.0603448	1	Liver	eQTL
LOC101796243	1_137628213	0.999999	0.0313808	2	Liver	eQTL
SLC9A7	1_137140684	0.946362	0.0413223	1	Liver	eQTL
LOC106017632	1_137121697	0.984038	0.0625	1	Liver	eQTL
LOC119715663	1_138765527	0.998431	0.167373	1	Liver	eQTL
LIPT1	1_139355035	0.919261	0.0423387	2	Liver	eQTL
LOC106015117	1_140749634	0.99875	0.116379	1	Liver	eQTL
LOC101794055	1_140676887	0.983259	0.182008	1	Liver	eQTL
SULT1C4	1_143376283	0.999629	0.0497925	1	Liver	eQTL
GRTP1	1_144346023	0.904505	0.290043	1	Liver	eQTL
LAMP1	1_144421438	0.957204	0.18595	1	Liver	eQTL
LOC101795284	1_144569325	0.951326	0.319328	2	Liver	eQTL
LOC101795465	1_144503770	0.99851	0.256356	2	Liver	eQTL
LOC119715606	1_144423972	0.985527	0.0326531	1	Liver	eQTL
LOC119715606	1_144460399	0.984229	0.329114	2	Liver	eQTL
CARS2	1_146215253	0.928455	0.243534	1	Liver	eQTL
LIG4	1_147186425	0.997732	0.282051	2	Liver	eQTL
POGLUT2	1_150069961	0.967045	0.139831	1	Liver	eQTL
HS6ST3	1_153192777	1	0.033195	1	Liver	eQTL
TDRD3	1_171379637	0.986017	0.173554	1	Liver	eQTL
LOC101799766	1_176846498	0.999915	0.0737705	1	Liver	eQTL
LOC119715617	1_176975892	0.999536	0.0781893	1	Liver	eQTL
LOC119715623	1_177221731	0.997901	0.286008	1	Liver	eQTL
LOC101792784	1_177218461	1	0.424051	1	Liver	eQTL
LOC119715627	1_177186812	0.999992	0.393162	1	Liver	eQTL
LOC113845548	1_178414655	0.999451	0.158996	1	Liver	eQTL
CDADC1	1_178474817	0.993027	0.195473	1	Liver	eQTL
LOC119715773	1_179642312	0.923634	0.357741	1	Liver	eQTL
STOML3	1_180392947	0.990841	0.0670732	1	Liver	eQTL
STOML3	1_181426010	0.950606	0.142857	2	Liver	eQTL
LOC119715825	1_180489630	1	0.0430328	1	Liver	eQTL
LOC119715825	1_181161196	0.991014	0.0274262	2	Liver	eQTL
NBEA	1_182524852	0.951608	0.265957	2	Liver	eQTL
LOC113845351	1_183422712	0.999889	0.060166	1	Liver	eQTL
N4BP2L2	1_183921185	0.999985	0.103659	1	Liver	eQTL
N4BP2L2	1_184332403	0.999946	0.0392562	2	Liver	eQTL
N4BP2L1	1_183880544	0.993289	0.304721	1	Liver	eQTL
LOC113841038	1_184458815	0.999087	0.0441177	1	Liver	eQTL
LOC113841038	1_184249255	0.976506	0.0387931	2	Liver	eQTL
GTF3A	1_185772494	0.979282	0.349785	1	Liver	eQTL
LOC119715966	1_185602846	0.986154	0.0428571	1	Liver	eQTL
LOC119715994	1_186290559	0.989707	0.0430328	2	Liver	eQTL
LOC119712989	1_188183534	0.997256	0.285433	1	Liver	eQTL
CRYL1	1_188564207	0.999656	0.13924	1	Liver	eQTL
LOC119716068	1_188615197	0.991742	0.352321	1	Liver	eQTL
LOC101797703	1_188756323	0.920063	0.360515	1	Liver	eQTL
MPHOSPH8	1_188927914	0.999847	0.0886076	1	Liver	eQTL
POGLUT3	1_189861596	0.97727	0.0295359	2	Liver	eQTL
MRE11	1_195969321	0.996468	0.237288	1	Liver	eQTL
MRE11	1_196217778	0.976357	0.0349794	2	Liver	eQTL
SLC36A4	1_196508268	0.949168	0.306867	1	Liver	eQTL
TMEM126A	1_199701051	0.991245	0.0345528	1	Liver	eQTL
DDIAS	1_200375893	0.908125	0.132231	2	Liver	eQTL
CCDC89	1_201154284	0.933319	0.0606695	1	Liver	eQTL
CCDC83	1_201199745	0.990386	0.0702128	1	Liver	eQTL
CCDC83	1_201172108	1	0.125	2	Liver	eQTL
RPS3	1_205326499	0.998497	0.167373	1	Liver	eQTL
LOC113844224	1_205876695	0.970429	0.258547	1	Liver	eQTL
RNF169	1_205992024	0.997116	0.133621	1	Liver	eQTL
LOC119716850	1_206304563	0.999269	0.0974576	1	Liver	eQTL
LOC119716862	1_206244830	0.999999	0.147303	1	Liver	eQTL
LOC119716856	1_206470687	0.978743	0.0409836	1	Liver	eQTL
LOC101803400	1_206268539	0.999919	0.0274262	1	Liver	eQTL
LOC119716872	1_206298485	0.99978	0.410638	1	Liver	eQTL
PGAP2	1_206496910	0.999878	0.395745	1	Liver	eQTL
LOC101801715	1_206671107	0.936738	0.0783133	1	Liver	eQTL
LOC119716816	1_206795143	0.982163	0.0840164	1	Liver	eQTL
LOC119716816	1_206451275	0.991621	0.033195	2	Liver	eQTL
LOC101795541	1_206795143	0.999894	0.0840164	1	Liver	eQTL
LOC101798615	1_206867908	0.987179	0.411392	1	Liver	eQTL
LOC113844796	1_206961869	0.97503	0.0367347	2	Liver	eQTL
LOC119716182	2_3890835	0.96333	0.0991735	1	Liver	eQTL
FAM135B	2_5599468	0.986678	0.119247	1	Liver	eQTL
LOC119716097	2_8020626	0.996591	0.144397	1	Liver	eQTL
ST3GAL1	2_10288999	0.90548	0.193617	1	Liver	eQTL
LOC113842928	2_9871295	0.933662	0.140756	1	Liver	eQTL
EFR3A	2_10680184	0.999878	0.395652	1	Liver	eQTL
LOC113842916	2_14062523	0.994172	0.1841	1	Liver	eQTL
DERL1	2_14187226	0.99968	0.44181	1	Liver	eQTL
SNTB1	2_14806307	0.967681	0.0669456	1	Liver	eQTL
LOC101798681	2_15055700	0.994969	0.093361	1	Liver	eQTL
LOC106018437	2_15334551	0.934655	0.436681	1	Liver	eQTL
LOC119715867	2_15461711	0.999979	0.0400844	1	Liver	eQTL
LOC119715867	2_15447880	0.995333	0.16805	2	Liver	eQTL
LOC101796665	2_23139353	0.999895	0.0323887	1	Liver	eQTL
RIMS2	2_22591015	1	0.443966	1	Liver	eQTL
RIMS2	2_22574572	0.986707	0.196581	2	Liver	eQTL
NCALD	2_23257890	0.93779	0.161017	1	Liver	eQTL
POP1	2_24211486	0.996812	0.0302419	1	Liver	eQTL
ERICH5	2_25056821	0.997279	0.0654008	1	Liver	eQTL
ERICH5	2_24214084	0.93323	0.0884774	3	Liver	eQTL
RPL30	2_24869319	0.998439	0.1875	1	Liver	eQTL
LAPTM4B	2_24896938	0.925456	0.49359	1	Liver	eQTL
CPQ	2_25239324	0.97507	0.188841	1	Liver	eQTL
CPQ	2_25268788	0.934295	0.142241	2	Liver	eQTL
CPQ	2_25281873	0.998636	0.299587	3	Liver	eQTL
LOC113842892	2_25398664	0.999346	0.220524	1	Liver	eQTL
LOC113842892	2_25378922	0.996049	0.112288	2	Liver	eQTL
LOC113842891	2_25392767	1	0.271552	1	Liver	eQTL
MTERF3	2_25456765	0.927721	0.0386179	1	Liver	eQTL
LOC101793684	2_26058239	0.937327	0.0273109	1	Liver	eQTL
LOC101800982	2_28069406	0.931296	0.185345	1	Liver	eQTL
LOC106019204	2_32710055	0.910855	0.0777311	1	Liver	eQTL
LOC113842875	2_36242208	0.999831	0.170886	1	Liver	eQTL
LOC113842875	2_36218946	0.98882	0.0420168	2	Liver	eQTL
TRAM1	2_36607091	0.933565	0.373391	1	Liver	eQTL
TRAM1	2_36430218	0.990188	0.255187	2	Liver	eQTL
LOC106014912	2_39957734	0.997625	0.0414938	2	Liver	eQTL
LOC106014754	2_40908138	0.999745	0.28481	1	Liver	eQTL
LOC110351435	2_41490987	0.991966	0.339827	1	Liver	eQTL
LOC106020245	2_43286411	0.999995	0.119048	1	Liver	eQTL
LOC106020245	2_43488780	0.999964	0.0307377	2	Liver	eQTL
LOC119716069	2_43408328	0.999883	0.144958	1	Liver	eQTL
CEP76	2_51053713	0.999607	0.104167	1	Liver	eQTL
AFG3L2	2_51321710	0.978212	0.276824	1	Liver	eQTL
MPPE1	2_51977812	0.975544	0.0446809	1	Liver	eQTL
DLGAP1	2_55030903	0.976632	0.034413	1	Liver	eQTL
DLGAP1	2_54996104	0.973285	0.126582	2	Liver	eQTL
MYOM1	2_55247541	0.9982	0.216942	1	Liver	eQTL
METTL4	2_55501692	0.984002	0.386752	1	Liver	eQTL
LOC101797754	2_56827318	0.961251	0.0447154	2	Liver	eQTL
ABHD3	2_56765915	0.948121	0.427039	1	Liver	eQTL
LOC119716187	2_56771168	1	0.0528455	1	Liver	eQTL
LOC119716187	2_56610780	0.995072	0.0553279	2	Liver	eQTL
LOC106015459	2_56885111	0.993976	0.21308	1	Liver	eQTL
LOC101798838	2_56894394	0.998004	0.236515	1	Liver	eQTL
ANKRD29	2_57401326	1	0.315678	1	Liver	eQTL
FBXO15	2_63748956	0.999135	0.176596	1	Liver	eQTL
CLPTM1L	2_71009628	0.999999	0.0289256	1	Liver	eQTL
SDHA	2_70656944	0.999873	0.401261	1	Liver	eQTL
LOC113842798	2_70660839	0.999513	0.398305	1	Liver	eQTL
LOC119715711	2_76285541	0.949315	0.0971074	1	Liver	eQTL
ATPSCKMT	2_79143667	0.980091	0.3375	1	Liver	eQTL
BPHL	2_81862945	0.999321	0.16453	1	Liver	eQTL
NQO2	2_81930164	0.961026	0.0390947	1	Liver	eQTL
ECI2	2_92906942	0.99994	0.0330578	1	Liver	eQTL
FARS2	2_93365319	0.978452	0.216049	1	Liver	eQTL
LOC113842743	2_95863807	0.928356	0.0884774	3	Liver	eQTL
SYCP2L	2_95726283	0.970657	0.0665236	1	Liver	eQTL
LOC106015575	2_96074210	0.999999	0.092827	1	Liver	eQTL
LOC110351875	2_95888387	1	0.0899582	1	Liver	eQTL
LOC113841408	2_98830220	0.970009	0.239496	1	Liver	eQTL
TBC1D7	2_98794811	0.993475	0.223404	1	Liver	eQTL
LRRFIP2	2_104004879	0.997469	0.12395	1	Liver	eQTL
SUGCT	2_104292376	0.986076	0.276371	1	Liver	eQTL
LOC106015519	2_104514234	0.99992	0.10124	1	Liver	eQTL
NRSN1	2_115232377	0.995467	0.109959	1	Liver	eQTL
LOC101803238	2_117095597	0.973174	0.128692	1	Liver	eQTL
KIAA1143	2_118034077	0.988081	0.170886	1	Liver	eQTL
FYCO1	2_118498453	0.930208	0.28125	1	Liver	eQTL
LOC113842522	2_118398429	0.99924	0.128099	2	Liver	eQTL
ACAD11	2_119057800	0.999942	0.465368	1	Liver	eQTL
ACP3	2_118287192	0.999959	0.0308642	1	Liver	eQTL
LOC101805018	2_118345202	0.935648	0.0550847	1	Liver	eQTL
LOC101805018	2_118657648	0.997881	0.0679012	2	Liver	eQTL
METTL6	2_120053272	0.999669	0.225738	1	Liver	eQTL
METTL6	2_119841422	0.93306	0.109959	2	Liver	eQTL
MTURN	2_119295444	0.997317	0.076087	1	Liver	eQTL
CMTM6	2_121024203	0.999605	0.36383	1	Liver	eQTL
LOC106019988	2_122506175	0.999223	0.0557851	2	Liver	eQTL
LOC101794569	2_123403016	1	0.233051	1	Liver	eQTL
OXSM	2_123538059	0.999898	0.316239	1	Liver	eQTL
LOC106020176	2_125404446	1	0.143162	1	Liver	eQTL
LOC106020176	2_125400589	0.929332	0.153846	2	Liver	eQTL
LOC119715785	2_125403433	0.988618	0.129787	1	Liver	eQTL
LOC119715785	2_125415444	0.950968	0.134615	2	Liver	eQTL
LOC119715801	2_125461986	0.986862	0.105932	1	Liver	eQTL
DPH3	2_127367697	0.994712	0.273109	1	Liver	eQTL
JAZF1	2_129222667	0.999879	0.0390946	1	Liver	eQTL
FAM221A	2_130479102	0.980707	0.34188	1	Liver	eQTL
MALSU1	2_130682244	0.999988	0.129167	1	Liver	eQTL
CDCA7L	2_131163288	1	0.489362	1	Liver	eQTL
SOSTDC1	2_132938245	0.942387	0.060166	1	Liver	eQTL
LOC101801254	2_135206968	1	0.0406504	1	Liver	eQTL
BET1	2_139072884	0.995529	0.176471	1	Liver	eQTL
LOC101794407	2_139131976	0.999931	0.154959	1	Liver	eQTL
LOC101793511	2_139183426	0.999536	0.0309917	1	Liver	eQTL
GTPBP10	2_141210924	0.969812	0.235043	1	Liver	eQTL
STEAP2	2_140567867	0.993184	0.0991561	2	Liver	eQTL
PTER	2_142749423	0.981597	0.237288	1	Liver	eQTL
C1QL3	2_142552757	0.97815	0.07173	1	Liver	eQTL
ST8SIA6	2_143228484	0.925261	0.199153	1	Liver	eQTL
C2H10orf67	2_145745855	0.998039	0.276151	1	Liver	eQTL
THNSL1	2_146395800	0.998297	0.165957	1	Liver	eQTL
GTPBP4	2_153301814	0.999172	0.331933	1	Liver	eQTL
NOM1	2_155971861	0.998298	0.04375	2	Liver	eQTL
RBM33	2_155803066	0.977802	0.386752	1	Liver	eQTL
INSIG1	2_156066000	0.937571	0.0408163	1	Liver	eQTL
LOC106018381	2_157567800	1	0.0409836	1	Liver	eQTL
PRKAG2	2_158170526	0.999528	0.052521	1	Liver	eQTL
EXOG	2_159329814	0.98461	0.0506329	1	Liver	eQTL
GORASP1	2_159015710	0.999206	0.134199	1	Liver	eQTL
LOC101797260	2_159079416	0.921345	0.345339	2	Liver	eQTL
DLEC1	2_159381156	0.999776	0.253165	1	Liver	eQTL
DLEC1	2_159383713	0.999437	0.113734	2	Liver	eQTL
GARS1	2_159747978	0.955143	0.196203	1	Liver	eQTL
IBA57	2_161590110	0.998734	0.366379	1	Liver	eQTL
IBA57	2_161657607	0.935057	0.0567227	3	Liver	eQTL
GUK1	2_161666809	0.986502	0.0918803	2	Liver	eQTL
LOC113842606	2_162760639	0.997676	0.284188	1	Liver	eQTL
LOC119715906	2_162760639	1	0.284188	1	Liver	eQTL
LOC119715907	2_162760639	1	0.284188	1	Liver	eQTL
LOC119715807	2_163821092	0.977576	0.0242915	1	Liver	eQTL
LOC101798210	2_163479193	0.999745	0.155983	1	Liver	eQTL
LOC113840976	2_164030051	0.999065	0.188841	1	Liver	eQTL
LOC119715856	2_164029807	0.998903	0.25	1	Liver	eQTL
LOC119715848	2_163908202	0.999998	0.0743802	1	Liver	eQTL
LOC119715848	2_163416176	0.983349	0.0407725	2	Liver	eQTL
LOC119715853	2_163908202	0.984961	0.0743802	1	Liver	eQTL
LOC119715854	2_164054135	1	0.083682	1	Liver	eQTL
LOC119715858	2_163908202	1	0.0743802	1	Liver	eQTL
LOC119715849	2_164032972	1	0.235169	1	Liver	eQTL
LOC119715857	2_164063581	0.995519	0.392071	1	Liver	eQTL
LOC101790952	2_164059389	0.976632	0.244681	1	Liver	eQTL
LOC101790952	2_164032750	0.960271	0.0300429	2	Liver	eQTL
LOC119715844	2_164294773	0.986968	0.056962	1	Liver	eQTL
SMARCD3	2_164520057	0.992145	0.438559	1	Liver	eQTL
LOC113841891	2_164520390	0.990335	0.183761	1	Liver	eQTL
LOC119716266	2_164515409	1	0.213389	2	Liver	eQTL
KIZ	3_848596	0.974611	0.128692	1	Liver	eQTL
LOC101801977	3_2099274	0.991506	0.429185	1	Liver	eQTL
LOC113843061	3_2197665	0.947949	0.385776	1	Liver	eQTL
CFAP36	3_2209351	0.963107	0.462025	1	Liver	eQTL
LOC110352611	3_2549865	0.992366	0.12766	1	Liver	eQTL
FAM161A	3_4512519	0.916965	0.371849	1	Liver	eQTL
FERMT1	3_4557301	0.937534	0.0714286	1	Liver	eQTL
PAK5	3_5309241	0.998603	0.0395833	1	Liver	eQTL
LOC101790005	3_5318003	0.999724	0.0454545	1	Liver	eQTL
LOC106016993	3_12190811	0.998101	0.119658	1	Liver	eQTL
LOC106016993	3_12177461	0.97285	0.45	2	Liver	eQTL
GALM	3_13211222	0.930174	0.0394191	1	Liver	eQTL
LOC101803001	3_12669702	0.90797	0.291139	1	Liver	eQTL
LOC101798611	3_13437227	0.999994	0.468085	1	Liver	eQTL
LOC119716451	3_13695232	0.999245	0.330508	1	Liver	eQTL
LOC119716451	3_13446297	0.968435	0.152083	3	Liver	eQTL
LOC101798438	3_13626448	0.998611	0.175	1	Liver	eQTL
LOC119716581	3_14229970	0.999999	0.198745	1	Liver	eQTL
LOC101803288	3_14523297	0.978566	0.445887	1	Liver	eQTL
TMEM63A	3_18493000	0.999204	0.0514403	1	Liver	eQTL
LOC119716591	3_20829009	0.981453	0.0751073	2	Liver	eQTL
LOC101794821	3_21755158	0.975007	0.339583	1	Liver	eQTL
LOC101794821	3_22380397	0.919321	0.0510638	2	Liver	eQTL
INTS7	3_24445127	0.992326	0.0701754	1	Liver	eQTL
LPGAT1	3_23783762	0.929238	0.458696	1	Liver	eQTL
LOC106019027	3_24866417	0.911457	0.247899	1	Liver	eQTL
LOC106018404	3_25144324	0.986317	0.2827	1	Liver	eQTL
LOC113843132	3_25448827	0.920062	0.259336	1	Liver	eQTL
TBCE	3_25369381	0.926439	0.328571	2	Liver	eQTL
NID1	3_26123870	0.972497	0.0485232	1	Liver	eQTL
ACTN2	3_25808911	0.993792	0.275424	1	Liver	eQTL
LOC101792586	3_28412957	0.996042	0.0497925	2	Liver	eQTL
QPCT	3_30219189	0.99997	0.0303644	1	Liver	eQTL
QPCT	3_30209131	0.999929	0.161088	2	Liver	eQTL
LOC119716619	3_33101398	0.918687	0.380952	1	Liver	eQTL
MRPS18A	3_33173760	0.999719	0.476395	1	Liver	eQTL
LOC113843158	3_33528836	0.942742	0.0991379	1	Liver	eQTL
KIF6	3_35144759	0.999042	0.144033	1	Liver	eQTL
SUPT7L	3_35751073	0.986961	0.119247	2	Liver	eQTL
MCFD2	3_37250373	0.992156	0.378151	1	Liver	eQTL
LOC113843164	3_37715311	0.959929	0.405983	1	Liver	eQTL
NTPCR	3_42027375	0.999175	0.300847	1	Liver	eQTL
CAPN9	3_43284751	0.982492	0.0901288	1	Liver	eQTL
ARV1	3_43381466	0.939345	0.319149	1	Liver	eQTL
TRIM67	3_43487416	1	0.0445344	1	Liver	eQTL
PDCD2	3_43533323	0.990696	0.259336	1	Liver	eQTL
FAM120B	3_43636687	0.999529	0.292735	1	Liver	eQTL
ERMARD	3_44607961	0.999983	0.0290456	2	Liver	eQTL
LOC101800325	3_47091706	0.999863	0.0564854	1	Liver	eQTL
PNLDC1	3_48955663	1	0.0612245	1	Liver	eQTL
PNLDC1	3_49289631	0.977486	0.0491803	2	Liver	eQTL
TMEM242	3_55169788	0.908824	0.364807	2	Liver	eQTL
GTF2H5	3_55527393	0.999993	0.337553	1	Liver	eQTL
ABRACL	3_57959411	0.993236	0.478992	1	Liver	eQTL
LOC113843220	3_58641164	0.949395	0.137339	1	Liver	eQTL
PEX7	3_59502408	0.999681	0.0327869	2	Liver	eQTL
LOC101798228	3_60800040	0.936901	0.385776	1	Liver	eQTL
CCN2	3_60883973	1	0.0479167	1	Liver	eQTL
HDDC2	3_64251212	0.999494	0.140693	1	Liver	eQTL
SMPDL3A	3_65371505	0.957283	0.228395	1	Liver	eQTL
SMPDL3A	3_65624402	0.999964	0.062753	2	Liver	eQTL
LOC106016366	3_66793913	0.954675	0.109959	1	Liver	eQTL
LOC106016366	3_67099351	0.988254	0.257511	2	Liver	eQTL
MAN1A1	3_66918666	0.989289	0.219149	1	Liver	eQTL
NT5DC1	3_68942265	0.998441	0.176596	2	Liver	eQTL
FIG4	3_71362837	0.996291	0.0991735	1	Liver	eQTL
PPIL6	3_71507429	0.960716	0.280335	1	Liver	eQTL
PPIL6	3_71512774	0.999999	0.0409836	2	Liver	eQTL
RTN4IP1	3_72563520	1	0.144958	1	Liver	eQTL
RTN4IP1	3_72644406	0.948018	0.123932	2	Liver	eQTL
COQ3	3_76443436	0.983475	0.195021	1	Liver	eQTL
MANEA	3_78808537	0.999489	0.22103	1	Liver	eQTL
LOC106014820	3_81079028	0.98474	0.226891	1	Liver	eQTL
CNR1	3_82200349	0.972637	0.0606695	1	Liver	eQTL
SMIM8	3_81764415	0.999996	0.225532	1	Liver	eQTL
LOC113843026	3_85034898	0.968614	0.165236	1	Liver	eQTL
LOC113843026	3_84792250	0.996163	0.120172	3	Liver	eQTL
MTO1	3_87100833	0.972522	0.377119	1	Liver	eQTL
ASRGL1	3_88046653	0.998964	0.0323276	1	Liver	eQTL
OGFRL1	3_88140152	0.999996	0.103659	1	Liver	eQTL
EYS	3_91605226	0.982997	0.438298	1	Liver	eQTL
LOC101796814	3_91659637	0.974484	0.449791	1	Liver	eQTL
LOC101796851	3_94576755	0.953758	0.0286885	1	Liver	eQTL
LOC101797566	3_95852940	0.999371	0.0446809	1	Liver	eQTL
TMEM14A	3_95006606	0.995602	0.335443	2	Liver	eQTL
LOC101794984	3_98579574	0.992401	0.0899582	1	Liver	eQTL
MBOAT2	3_103952099	0.929623	0.0338983	1	Liver	eQTL
SF3B6	3_112266081	1	0.375	1	Liver	eQTL
TP53I3	3_112266081	0.999998	0.375	1	Liver	eQTL
CENPQ	3_113335075	0.999934	0.260593	1	Liver	eQTL
LOC106020298	3_114407517	0.971923	0.251046	1	Liver	eQTL
SLC25A27	3_113544047	0.994483	0.0207469	2	Liver	eQTL
ANKRD66	3_114520182	0.998993	0.228992	1	Liver	eQTL
LOC101804486	3_114520020	0.924754	0.191489	2	Liver	eQTL
LOC119716436	3_114499209	0.985574	0.175847	2	Liver	eQTL
LOC113843351	3_114683343	0.987713	0.196653	1	Liver	eQTL
PAQR8	3_115539139	0.962626	0.261603	1	Liver	eQTL
EFHC1	3_116473307	0.991343	0.356838	1	Liver	eQTL
LOC119716357	3_115456899	0.980936	0.0590717	2	Liver	eQTL
LOC119716600	3_116418661	0.999673	0.29661	1	Liver	eQTL
LOC119716599	3_116031167	0.905934	0.0297872	1	Liver	eQTL
LOC113843354	3_116350812	0.998493	0.178723	1	Liver	eQTL
LOC119716437	3_119102420	1	0.0348361	1	Liver	eQTL
LOC119716437	3_119400121	0.990985	0.0705128	2	Liver	eQTL
LOC119716530	3_119102420	0.999824	0.0348361	1	Liver	eQTL
LOC110354782	3_119162975	0.994198	0.0661479	1	Liver	eQTL
LOC110354782	3_119157831	1	0.0271967	2	Liver	eQTL
LOC110354782	3_119141206	0.9971	0.0426829	3	Liver	eQTL
LOC110354783	3_119162839	0.999887	0.0719844	1	Liver	eQTL
LOC110354783	3_119191754	1	0.177043	2	Liver	eQTL
MAPRE3	3_120035346	0.959734	0.141079	1	Liver	eQTL
TMEM214	3_119768999	0.972588	0.252119	2	Liver	eQTL
LOC119716391	3_119826400	0.999459	0.0433884	1	Liver	eQTL
LOC101792819	3_119881119	0.999696	0.179167	1	Liver	eQTL
IFT172	3_119997120	0.980323	0.428879	1	Liver	eQTL
LOC101797052	4_913144	0.99998	0.49359	1	Liver	eQTL
PRSS12	4_608612	0.997446	0.0539419	1	Liver	eQTL
LOC101796679	4_1085412	0.999985	0.271186	1	Liver	eQTL
CASP6	4_4330922	0.9996	0.294606	1	Liver	eQTL
GIMD1	4_5649201	0.959243	0.0791667	1	Liver	eQTL
GIMD1	4_6292798	0.998397	0.0454545	2	Liver	eQTL
AIMP1	4_5319691	0.96105	0.17234	1	Liver	eQTL
PPA2	4_5879964	0.991772	0.159483	2	Liver	eQTL
MANBA	4_6652169	0.972509	0.0564854	1	Liver	eQTL
LOC119716840	4_7610257	0.969953	0.141026	1	Liver	eQTL
LOC101793960	4_7486327	0.916801	0.0557851	1	Liver	eQTL
METAP1	4_7617669	0.988102	0.310924	1	Liver	eQTL
LOC101794146	4_7634550	0.999927	0.304255	1	Liver	eQTL
PYURF	4_11724456	0.958852	0.465812	1	Liver	eQTL
PYURF	4_11731102	0.976604	0.115385	2	Liver	eQTL
PIGY	4_11724456	0.999896	0.465812	1	Liver	eQTL
SARAF	4_12156043	0.999831	0.248954	1	Liver	eQTL
PPEF2	4_15324916	1	0.152083	1	Liver	eQTL
LOC110354751	4_15422271	0.946588	0.22103	1	Liver	eQTL
GSR	4_16046124	0.980631	0.0487288	2	Liver	eQTL
SMIM19	4_16220185	0.958364	0.0903614	1	Liver	eQTL
PDGFRL	4_17774046	0.996168	0.0514403	1	Liver	eQTL
MTUS1	4_18776659	0.930882	0.0485232	1	Liver	eQTL
C4H4orf47	4_19844029	0.999787	0.266094	1	Liver	eQTL
LOC113843508	4_19810883	0.999306	0.0285714	1	Liver	eQTL
ENPP6	4_19628863	0.987677	0.0355649	1	Liver	eQTL
AGA	4_23358550	0.984137	0.17234	1	Liver	eQTL
FBXO8	4_24271086	0.934263	0.0693878	1	Liver	eQTL
LOC101796904	4_24655036	0.974702	0.190083	1	Liver	eQTL
LOC101796904	4_25532687	0.979569	0.146186	2	Liver	eQTL
AADAT	4_25757846	0.988079	0.223176	1	Liver	eQTL
NAF1	4_28041502	0.994758	0.134298	1	Liver	eQTL
LOC119716713	4_28208320	1	0.0528455	1	Liver	eQTL
LOC119716713	4_28294582	0.989355	0.0529661	2	Liver	eQTL
MMAA	4_34776763	0.987835	0.378723	1	Liver	eQTL
ABCE1	4_34870585	0.98045	0.0954357	1	Liver	eQTL
TBC1D9	4_36256839	0.999015	0.0366379	1	Liver	eQTL
CCNA2	4_42536741	1	0.0307377	1	Liver	eQTL
COQ2	4_44390424	0.933323	0.38412	1	Liver	eQTL
LOC119716833	4_45201495	0.999969	0.0606695	2	Liver	eQTL
LOC101799420	4_45192851	0.999972	0.170168	1	Liver	eQTL
SCFD2	4_49248266	0.961033	0.329114	1	Liver	eQTL
TMEM33	4_51600575	0.967678	0.0630435	2	Liver	eQTL
LOC106020078	4_52970534	0.932617	0.30083	1	Liver	eQTL
LGI2	4_57395433	0.931159	0.189024	1	Liver	eQTL
BST1	4_60807474	0.999975	0.495745	1	Liver	eQTL
LOC106016290	4_61616756	0.998582	0.231092	1	Liver	eQTL
LOC110354175	4_62260714	0.999816	0.0458333	1	Liver	eQTL
TMEM128	4_62200924	0.958647	0.137712	1	Liver	eQTL
TADA2B	4_64317819	0.95982	0.302041	2	Liver	eQTL
NOP14	4_67276014	0.996884	0.0404858	1	Liver	eQTL
LOC106015933	4_66332641	0.97802	0.0714286	1	Liver	eQTL
LOC106015933	4_67097679	0.99484	0.062753	2	Liver	eQTL
LOC106015931	4_66770266	1	0.060166	1	Liver	eQTL
LOC106015931	4_67467533	0.996506	0.055102	2	Liver	eQTL
TNIP2	4_67224881	0.981128	0.229787	2	Liver	eQTL
LOC106015914	4_70053951	0.999012	0.0622407	1	Liver	eQTL
LOC106015914	4_70062854	0.999129	0.0432099	2	Liver	eQTL
ST3GAL5	4_70253560	0.914168	0.135593	1	Liver	eQTL
LOC119716851	4_70496698	0.999607	0.168776	1	Liver	eQTL
LOC113843458	4_76192759	0.989521	0.117155	1	Liver	eQTL
LOC113843458	4_76212362	0.995223	0.491416	2	Liver	eQTL
LOC119717177	5_120825	0.999996	0.0462185	1	Liver	eQTL
FKBP3	5_1320276	0.95946	0.213675	1	Liver	eQTL
LOC119717106	5_2921656	0.997108	0.0669456	1	Liver	eQTL
DNAAF2	5_2946823	0.99999	0.179325	1	Liver	eQTL
POLE2	5_2945589	0.997727	0.17418	1	Liver	eQTL
KLHDC1	5_2958724	0.98173	0.229614	1	Liver	eQTL
RTRAF	5_3474345	0.912439	0.162393	1	Liver	eQTL
DDHD1	5_3749092	0.996919	0.0441177	1	Liver	eQTL
DDHD1	5_3700620	0.978913	0.26383	2	Liver	eQTL
SOCS4	5_4319472	0.903944	0.449153	1	Liver	eQTL
TRMT61A	5_11859166	0.935724	0.0282258	1	Liver	eQTL
TRMT61A	5_10688177	0.991913	0.0333333	2	Liver	eQTL
LOC101792124	5_13425391	0.990765	0.240343	1	Liver	eQTL
NDUFB1	5_17118260	0.995945	0.206383	2	Liver	eQTL
GPR65	5_19668999	0.970951	0.0368852	1	Liver	eQTL
ADCK1	5_23405112	0.964292	0.4375	1	Liver	eQTL
NOXRED1	5_23648554	0.999723	0.060166	2	Liver	eQTL
SAMD15	5_23657066	0.999899	0.0761317	1	Liver	eQTL
LOC101796284	5_23590625	0.998172	0.393305	1	Liver	eQTL
IFT43	5_24318436	0.995735	0.219008	1	Liver	eQTL
MLH3	5_24672026	0.999686	0.266529	1	Liver	eQTL
RNH1	5_26892546	0.951476	0.116803	1	Liver	eQTL
SAAL1	5_30280064	0.974695	0.15625	1	Liver	eQTL
LOC113843852	5_30755647	0.999962	0.0290456	1	Liver	eQTL
LOC113843852	5_30780446	0.997363	0.0546219	2	Liver	eQTL
LOC110354277	5_30755647	0.999999	0.0290456	1	Liver	eQTL
LOC101797677	5_30997392	1	0.0732218	1	Liver	eQTL
LOC101797088	5_30954216	0.961524	0.0860656	1	Liver	eQTL
LOC101797088	5_31227649	0.986357	0.033195	2	Liver	eQTL
NUDT8	5_31180058	0.969872	0.274892	3	Liver	eQTL
INAFM2	5_31725470	0.982007	0.208333	1	Liver	eQTL
IGHMBP2	5_32402579	0.921936	0.204255	1	Liver	eQTL
MRPL21	5_32537260	0.999915	0.135776	1	Liver	eQTL
LOC106020235	5_32598990	1	0.0843621	1	Liver	eQTL
LOC106020235	5_32714800	0.984101	0.0655738	2	Liver	eQTL
PGGHG	5_32412837	0.999061	0.315451	1	Liver	eQTL
ARFGAP2	5_32984903	0.995527	0.191983	1	Liver	eQTL
LOC119717113	5_33109559	0.96983	0.130802	2	Liver	eQTL
EXD1	5_33810847	0.998264	0.109756	1	Liver	eQTL
LOC101791375	5_33985443	0.979217	0.208861	1	Liver	eQTL
PLA2G4B	5_34595954	0.927873	0.154008	1	Liver	eQTL
PLA2G4B	5_34519529	0.953051	0.484979	2	Liver	eQTL
GANC	5_36008068	0.998584	0.226891	1	Liver	eQTL
PTGR2	5_35579510	0.93116	0.0443548	1	Liver	eQTL
LOC101795537	5_37015513	0.989487	0.0515021	2	Liver	eQTL
SLC39A9	5_37724205	0.988829	0.409483	1	Liver	eQTL
LOC119717003	5_38725826	0.974736	0.0666667	1	Liver	eQTL
LOC101793409	5_39087445	0.994737	0.440928	1	Liver	eQTL
LOC101793409	5_38614550	0.974957	0.273504	2	Liver	eQTL
LOC113843806	5_39007210	0.999988	0.0711297	1	Liver	eQTL
SRP14	5_39866554	0.996887	0.0914634	1	Liver	eQTL
NUBPL	5_44935272	0.999829	0.314894	1	Liver	eQTL
DHCR7	5_47275686	0.908273	0.137712	1	Liver	eQTL
LOC101796972	5_49745581	0.999993	0.233193	1	Liver	eQTL
TRAF6	5_51066073	0.92394	0.115385	1	Liver	eQTL
IFTAP	5_50393462	0.990746	0.267933	1	Liver	eQTL
CLP1	5_54699800	0.997035	0.103814	1	Liver	eQTL
LOC101804154	5_55166911	0.997276	0.349138	1	Liver	eQTL
LOC101804334	5_55596402	0.997689	0.171206	1	Liver	eQTL
LOC101803633	5_55596402	0.998589	0.171206	1	Liver	eQTL
PRMT3	5_56864434	0.989144	0.088843	1	Liver	eQTL
ANO5	5_56866812	0.999181	0.446581	1	Liver	eQTL
KCNJ11	5_61972544	0.999226	0.153017	2	Liver	eQTL
LOC119717015	5_61988050	0.969532	0.184874	1	Liver	eQTL
LOC119717015	5_61975909	0.995834	0.179487	2	Liver	eQTL
NUCB2	5_61886926	0.955572	0.44181	1	Liver	eQTL
LOC106017560	5_63517222	0.996495	0.0321888	2	Liver	eQTL
LOC113844105	5_65465786	0.976372	0.0817121	1	Liver	eQTL
MICAL2	5_65900260	0.986443	0.12449	1	Liver	eQTL
MICAL2	5_66190477	0.985491	0.110879	3	Liver	eQTL
LOC119717384	6_284697	0.968846	0.0743802	1	Liver	eQTL
CWF19L1	6_116832	0.999998	0.0416667	1	Liver	eQTL
CHUK	6_110368	0.999446	0.0395833	2	Liver	eQTL
LOC101797420	6_866968	0.928962	0.139485	1	Liver	eQTL
MTG1	6_418587	0.987356	0.110638	2	Liver	eQTL
RNLS	6_448577	0.95218	0.170124	1	Liver	eQTL
LOC106016334	6_582624	0.95226	0.117155	1	Liver	eQTL
DNAJC9	6_2841060	0.999674	0.28355	1	Liver	eQTL
ECD	6_2848407	0.985131	0.153527	2	Liver	eQTL
LOC113844055	6_2890370	0.951163	0.119835	1	Liver	eQTL
PPA1	6_3156186	0.903348	0.370213	1	Liver	eQTL
PCBD1	6_3266572	0.97202	0.299145	1	Liver	eQTL
AIFM2	6_3646341	0.951004	0.372881	1	Liver	eQTL
RUFY2	6_4063658	0.999972	0.237395	1	Liver	eQTL
LOC101794888	6_9465929	0.914343	0.0723141	1	Liver	eQTL
PRXL2A	6_10791719	0.999746	0.177215	1	Liver	eQTL
CUEDC2	6_17217787	0.980033	0.0979167	1	Liver	eQTL
LOC101797254	6_17726888	0.999841	0.403846	1	Liver	eQTL
LOC106017906	6_19047566	1	0.0252101	1	Liver	eQTL
LOC101800616	6_23051056	0.999412	0.425847	1	Liver	eQTL
RRP12	6_23828994	0.970197	0.1	2	Liver	eQTL
HPS6	6_23493659	0.99876	0.245798	1	Liver	eQTL
MRPL43	6_24143663	0.985829	0.192469	1	Liver	eQTL
SFR1	6_25298919	0.963058	0.141949	1	Liver	eQTL
PDCD4	6_27268219	0.957816	0.204348	1	Liver	eQTL
GPAM	6_28162848	0.960557	0.0995851	1	Liver	eQTL
GPAM	6_28594809	0.984711	0.0680851	2	Liver	eQTL
HABP2	6_28765407	0.971478	0.280851	1	Liver	eQTL
LOC101801060	6_28902277	0.991833	0.429487	1	Liver	eQTL
ATRNL1	6_29626229	0.95625	0.109705	1	Liver	eQTL
SFXN4	6_31599744	0.983678	0.115063	1	Liver	eQTL
LOC119717414	6_32380145	0.999812	0.100858	1	Liver	eQTL
LOC119717414	6_32379257	0.999842	0.0788382	2	Liver	eQTL
LOC113844017	6_32379257	0.948593	0.0788382	2	Liver	eQTL
LOC101793848	6_33666012	0.999297	0.391775	2	Liver	eQTL
LOC110353762	6_33916543	0.981773	0.211864	1	Liver	eQTL
CTBP2	6_33892661	0.965655	0.0373444	1	Liver	eQTL
LOC119717367	6_36445105	0.984462	0.188034	2	Liver	eQTL
LOC101796860	6_36427133	0.997126	0.0738397	1	Liver	eQTL
LOC119717358	6_37877156	0.949268	0.373391	2	Liver	eQTL
LOC113843760	7_154349	0.999999	0.178571	1	Liver	eQTL
LOC119717423	7_267039	0.999661	0.356838	1	Liver	eQTL
LOC113843689	7_1800129	0.999847	0.0996016	1	Liver	eQTL
MMADHC	7_2428294	0.995217	0.117021	2	Liver	eQTL
MMADHC	7_2212542	0.962954	0.132911	3	Liver	eQTL
LOC101798344	7_6364785	0.999999	0.0458167	1	Liver	eQTL
LOC101804030	7_7450226	0.998923	0.259574	1	Liver	eQTL
RNF25	7_7478495	0.974066	0.142553	1	Liver	eQTL
SLC23A3	7_7643830	0.988128	0.0833333	1	Liver	eQTL
SLC23A3	7_7505802	0.994517	0.0702128	2	Liver	eQTL
CEP70	7_7731254	0.999245	0.217573	1	Liver	eQTL
THSD7B	7_10211171	1	0.0661157	1	Liver	eQTL
THSD7B	7_11398218	1	0.0497925	2	Liver	eQTL
PTPN4	7_13335521	0.984441	0.168085	1	Liver	eQTL
SLC12A8	7_16149788	0.96076	0.230126	1	Liver	eQTL
GLB1L	7_16359017	0.953766	0.282427	2	Liver	eQTL
DNAJB2	7_16347345	0.99584	0.281633	1	Liver	eQTL
BBS5	7_20058807	0.977421	0.0684647	1	Liver	eQTL
PHOSPHO2	7_20324733	0.970924	0.299163	1	Liver	eQTL
PHOSPHO2	7_21039542	0.996084	0.209016	2	Liver	eQTL
LOC106017149	7_21701445	0.997131	0.262605	1	Liver	eQTL
LOC106017149	7_21593655	0.973523	0.035124	2	Liver	eQTL
LOC113844213	7_22007711	0.978627	0.482906	1	Liver	eQTL
LOC113844213	7_22025131	0.984962	0.23029	2	Liver	eQTL
INO80D	7_25990087	0.984128	0.026971	1	Liver	eQTL
LOC106016166	7_27846846	0.998659	0.0389344	1	Liver	eQTL
POFUT2	7_28218111	0.944676	0.0826271	1	Liver	eQTL
SPP2	7_29597245	0.961216	0.409871	1	Liver	eQTL
COPS8	7_30374248	0.988294	0.445378	1	Liver	eQTL
RAB17	7_30567785	0.956103	0.2897	1	Liver	eQTL
LOC106017779	7_31787497	0.997985	0.0696202	2	Liver	eQTL
NUP35	7_33300757	0.92096	0.0987654	1	Liver	eQTL
SLC40A1	7_35474433	0.994413	0.0528455	1	Liver	eQTL
ASNSD1	7_35443496	1	0.373913	1	Liver	eQTL
PMS1	7_35488879	0.97374	0.403846	1	Liver	eQTL
HIBCH	7_35616430	0.999998	0.127706	1	Liver	eQTL
STK17B	7_37673680	0.999998	0.0317797	2	Liver	eQTL
HECW2	7_36942018	1	0.0277778	1	Liver	eQTL
COQ10B	7_38123155	0.999998	0.0772532	1	Liver	eQTL
HSPE1	7_38116064	0.963807	0.243698	1	Liver	eQTL
AOX1	7_39325854	0.908391	0.436709	1	Liver	eQTL
ORC2	7_39251689	0.908004	0.14557	1	Liver	eQTL
LOC119717581	8_885690	0.966607	0.036	2	Liver	eQTL
SLC44A3	8_1644265	0.987712	0.0389344	1	Liver	eQTL
LOC101802937	8_1559870	0.999995	0.0311203	1	Liver	eQTL
RWDD3	8_1801077	0.954389	0.108051	1	Liver	eQTL
DPYD	8_2266568	0.998995	0.177083	1	Liver	eQTL
PLPPR5	8_2729158	0.906648	0.0661157	1	Liver	eQTL
FRRS1	8_3009303	0.991225	0.276824	1	Liver	eQTL
CDC14A	8_3305122	0.944819	0.197154	1	Liver	eQTL
EXTL2	8_3390645	0.925157	0.480932	1	Liver	eQTL
SLC30A7	8_3402188	0.992586	0.452991	1	Liver	eQTL
LOC101798826	8_3413273	0.99994	0.290795	1	Liver	eQTL
LOC101798826	8_3412532	0.998133	0.0982906	2	Liver	eQTL
LOC119717571	8_3696580	0.997662	0.146939	1	Liver	eQTL
LOC106019800	8_4752382	0.992491	0.0670732	1	Liver	eQTL
GPSM2	8_5423467	0.932358	0.108163	1	Liver	eQTL
LOC106019440	8_6573250	0.965316	0.0491453	1	Liver	eQTL
LOC101798333	8_7299415	0.999517	0.0497925	1	Liver	eQTL
LOC101803713	8_7140428	0.979679	0.13983	1	Liver	eQTL
LOC113844342	8_7287788	0.999822	0.219665	2	Liver	eQTL
LOC101801688	8_7676290	0.995979	0.0487288	1	Liver	eQTL
HTATIP2	8_8302605	0.999684	0.0982906	1	Liver	eQTL
HTATIP2	8_8573175	0.971895	0.0333333	2	Liver	eQTL
LOC101804116	8_9223806	0.999478	0.0840336	1	Liver	eQTL
PRDX6	8_9277315	0.953486	0.149789	1	Liver	eQTL
LOC101800205	8_9754568	0.999029	0.198276	1	Liver	eQTL
LOC101795226	8_10057190	0.99238	0.331197	1	Liver	eQTL
SELE	8_9575948	0.994984	0.0337553	1	Liver	eQTL
DARS2	8_10601973	0.96414	0.451271	1	Liver	eQTL
LOC110354210	8_10655074	0.966139	0.351293	1	Liver	eQTL
CACNA1E	8_10089191	0.924762	0.0909091	1	Liver	eQTL
LOC119717614	8_16937592	0.928927	0.0389344	1	Liver	eQTL
CTBS	8_18141164	0.999713	0.0371901	1	Liver	eQTL
SPATA1	8_17755093	0.999581	0.0762712	1	Liver	eQTL
SPATA1	8_18252478	0.998775	0.0527426	2	Liver	eQTL
ERI3	8_21770370	0.995008	0.200422	1	Liver	eQTL
RPS8	8_21997371	0.999923	0.215812	1	Liver	eQTL
RPS8	8_22008820	0.982957	0.088983	2	Liver	eQTL
LOC113844405	8_22009747	0.997978	0.467811	1	Liver	eQTL
AKR1A1	8_22388775	0.992632	0.0362903	1	Liver	eQTL
POMGNT1	8_22813308	0.999996	0.339744	1	Liver	eQTL
NSUN4	8_22938694	0.99999	0.204082	1	Liver	eQTL
NSUN4	8_22920322	0.999986	0.36383	2	Liver	eQTL
LOC113844343	8_23376888	0.999939	0.189873	1	Liver	eQTL
KTI12	8_25769837	0.941931	0.25	2	Liver	eQTL
PARS2	8_27044197	0.95319	0.392704	1	Liver	eQTL
PARS2	8_27095880	0.975993	0.16087	2	Liver	eQTL
DAB1	8_27920982	0.993414	0.119149	1	Liver	eQTL
DAB1	8_27677553	0.959707	0.114224	2	Liver	eQTL
OMA1	8_28249008	0.928725	0.379167	1	Liver	eQTL
OMA1	8_28202947	0.983742	0.041841	2	Liver	eQTL
LOC113844285	8_28364428	0.977019	0.165966	1	Liver	eQTL
TM2D1	8_29302237	0.999972	0.312766	1	Liver	eQTL
PATJ	8_29298895	0.976278	0.120902	1	Liver	eQTL
EFCAB7	8_29842145	0.991897	0.18319	1	Liver	eQTL
SLC35D1	8_30755179	0.983948	0.0744681	1	Liver	eQTL
CRYZ	8_32312790	0.999435	0.177824	1	Liver	eQTL
LHX8	8_32449513	0.963091	0.228448	1	Liver	eQTL
LHX8	8_32546849	0.995684	0.387931	2	Liver	eQTL
LOC119717646	8_32521777	0.955889	0.396552	1	Liver	eQTL
MSH4	8_32528829	0.999686	0.108051	1	Liver	eQTL
LOC113840876	8_32607212	0.94136	0.214008	1	Liver	eQTL
LOC101804571	9_1037740	0.999998	0.0722892	1	Liver	eQTL
LOC101804571	9_1055352	0.999387	0.271967	2	Liver	eQTL
GMPS	9_1407921	0.92289	0.287879	1	Liver	eQTL
PPM1L	9_2435903	0.992044	0.224359	1	Liver	eQTL
LOC113844445	9_4195383	0.964833	0.0576923	1	Liver	eQTL
RFC4	9_8937668	0.999825	0.222222	2	Liver	eQTL
KNG1	9_9205110	0.999673	0.0394191	1	Liver	eQTL
CLDN16	9_11497425	0.999999	0.117155	1	Liver	eQTL
LOC119717708	9_11803359	0.992289	0.217949	1	Liver	eQTL
LOC119717708	9_12471779	0.998891	0.0560166	2	Liver	eQTL
LOC101797047	9_12878867	0.968854	0.209205	1	Liver	eQTL
DUSP28	9_13760626	0.999495	0.0702128	1	Liver	eQTL
DTYMK	9_14922691	0.999507	0.368534	1	Liver	eQTL
RNF168	9_15013003	0.996554	0.158798	1	Liver	eQTL
PIGX	9_14912870	0.95423	0.320513	2	Liver	eQTL
SLC35G2	9_17113334	0.92828	0.13786	1	Liver	eQTL
AMMECR1L	9_17399968	0.983707	0.15678	1	Liver	eQTL
OTOS	9_18290368	1	0.0311203	1	Liver	eQTL
OTOS	9_18244298	0.999647	0.0491803	2	Liver	eQTL
LOC101803073	9_18446506	0.999962	0.0416667	1	Liver	eQTL
ITM2C	9_19290529	0.99812	0.04375	1	Liver	eQTL
ITM2C	9_18525285	0.991802	0.467391	2	Liver	eQTL
AP1S3	9_21703278	0.99804	0.107143	1	Liver	eQTL
PLS1	9_23904792	0.999586	0.0677966	1	Liver	eQTL
LOC119717773	9_25242906	1	0.0627615	1	Liver	eQTL
LOC113845140	9_25453226	0.968941	0.0957447	1	Liver	eQTL
LOC113845140	9_25405033	0.986257	0.0606695	3	Liver	eQTL
LOC113845139	9_25449188	0.993714	0.138075	1	Liver	eQTL
LOC119717947	10_388819	0.995279	0.0376569	1	Liver	eQTL
LOC113841793	10_3031044	1	0.498054	1	Liver	eQTL
LOC113840518	10_3047005	0.942503	0.406615	1	Liver	eQTL
LOC113840518	10_3229714	0.946855	0.365079	2	Liver	eQTL
LOC113841198	10_3216891	0.969984	0.350195	1	Liver	eQTL
LOC113842233	10_3031044	1	0.498054	1	Liver	eQTL
LOC113842233	10_3082946	0.99997	0.0376984	2	Liver	eQTL
LOC119717827	10_3216891	0.999999	0.350195	1	Liver	eQTL
LOC113841290	10_3216891	1	0.350195	1	Liver	eQTL
LOC113840693	10_2987362	0.951413	0.333992	1	Liver	eQTL
LOC113841786	10_3057380	0.987809	0.337302	1	Liver	eQTL
LOC113841212	10_3653486	0.998357	0.0491803	2	Liver	eQTL
NXT2	10_3550425	0.996298	0.0914894	1	Liver	eQTL
LOC101800937	10_4552145	0.999894	0.034	1	Liver	eQTL
MAGT1	10_4600987	0.903672	0.375	1	Liver	eQTL
LOC101797872	10_5224450	0.993182	0.0386266	1	Liver	eQTL
LOC119717821	10_5579251	0.952326	0.0514403	1	Liver	eQTL
LOC101791390	10_6278248	0.945613	0.180258	1	Liver	eQTL
LOC101790455	10_6336511	0.978306	0.291139	1	Liver	eQTL
LOC101790455	10_5523626	0.95145	0.146444	2	Liver	eQTL
LOC119717843	10_6217889	1	0.0423729	1	Liver	eQTL
LOC113843518	10_6358099	1	0.0367965	1	Liver	eQTL
LOC119717911	10_7894743	0.998919	0.0905172	1	Liver	eQTL
LOC119717911	10_6992723	0.950383	0.185345	2	Liver	eQTL
PHKA1	10_6696333	0.95418	0.160256	1	Liver	eQTL
PHKA1	10_6224633	0.992469	0.0798319	2	Liver	eQTL
LOC101799060	10_7453258	0.994942	0.152439	1	Liver	eQTL
LOC101802756	10_7456203	0.994791	0.321277	1	Liver	eQTL
LOC101802756	10_7501513	0.994646	0.326446	2	Liver	eQTL
LOC119717912	10_7597578	0.995144	0.10124	2	Liver	eQTL
LOC119717872	10_7456236	0.955554	0.153361	2	Liver	eQTL
LOC119717875	10_7455986	0.997856	0.36076	2	Liver	eQTL
TBC1D8B	10_9612303	0.976822	0.17437	1	Liver	eQTL
STEEP1	10_10283852	0.998849	0.14375	2	Liver	eQTL
LOC101800655	10_11927031	0.984507	0.0274262	1	Liver	eQTL
TEX11	10_12632529	0.980579	0.11336	1	Liver	eQTL
HS6ST2	10_14172034	0.99143	0.280172	1	Liver	eQTL
TRMT12	10_15911205	0.962742	0.0387755	2	Liver	eQTL
TRMT12	10_15821859	0.983178	0.135021	3	Liver	eQTL
DIAPH2	10_16179898	0.99722	0.0895833	2	Liver	eQTL
LOC119717803	10_19696639	0.999904	0.0344129	1	Liver	eQTL
P2RY4	10_20947982	0.998976	0.0477178	1	Liver	eQTL
LOC119717970	10_22223601	0.985003	0.263598	1	Liver	eQTL
LOC119717970	10_22395159	0.971269	0.206383	2	Liver	eQTL
LOC119717970	10_22163833	0.973114	0.0764463	3	Liver	eQTL
LOC119713013	10_22286559	0.935685	0.057377	1	Liver	eQTL
LOC113841896	10_22247364	0.942266	0.0394191	1	Liver	eQTL
SQOR	11_2393283	0.996323	0.2375	1	Liver	eQTL
LYSMD2	11_2482014	0.999683	0.154506	1	Liver	eQTL
LOC119718039	11_3890838	0.999974	0.0334728	1	Liver	eQTL
APBA2	11_6087778	1	0.0266393	1	Liver	eQTL
LOC101791616	11_7926972	0.905591	0.124481	2	Liver	eQTL
HYKK	11_8797160	0.999283	0.0302419	1	Liver	eQTL
EDC3	11_9852805	0.958663	0.133621	1	Liver	eQTL
LOC101790812	11_9910276	0.924166	0.0254237	1	Liver	eQTL
PPCDC	11_10361543	0.953633	0.0801688	1	Liver	eQTL
TERB2	11_11035618	0.966937	0.422594	1	Liver	eQTL
GATM	11_11335773	0.996563	0.044898	1	Liver	eQTL
MINAR1	11_14206028	0.999593	0.242678	1	Liver	eQTL
ABHD2	11_14408479	0.984994	0.0818965	2	Liver	eQTL
AEN	11_14541489	0.99997	0.204255	1	Liver	eQTL
DET1	11_14483613	0.913919	0.077551	1	Liver	eQTL
DET1	11_15011873	0.991747	0.108787	2	Liver	eQTL
LINS1	11_19008062	0.92301	0.0723404	1	Liver	eQTL
LOC119718038	11_19666517	0.971083	0.0357143	1	Liver	eQTL
LOC119718038	11_19100890	0.989985	0.0411523	2	Liver	eQTL
ANKDD1A	11_19987948	0.986257	0.0277778	1	Liver	eQTL
LOC119718037	11_19518327	0.999108	0.20339	1	Liver	eQTL
SNAPC5	11_20271560	0.97769	0.1	1	Liver	eQTL
CALML4	11_20985645	0.982731	0.0769231	1	Liver	eQTL
IDH2	11_22204096	0.995161	0.0829787	1	Liver	eQTL
NQO1	12_1218209	0.99943	0.212766	1	Liver	eQTL
PDF	12_1327546	0.999053	0.158996	1	Liver	eQTL
LOC106020320	12_1323556	0.995634	0.0529661	1	Liver	eQTL
LOC110352371	12_1489410	0.969306	0.444206	1	Liver	eQTL
LOC119718138	12_3488319	0.921355	0.348101	1	Liver	eQTL
LOC119718138	12_2651786	0.996495	0.0705394	3	Liver	eQTL
LOC101797468	12_3394559	0.98268	0.211864	1	Liver	eQTL
CMC2	12_5272918	0.940764	0.515086	1	Liver	eQTL
GINS3	12_11503844	0.992188	0.455882	1	Liver	eQTL
C12H16orf86	12_11521958	0.993291	0.137131	1	Liver	eQTL
LOC101795719	12_11723243	0.999977	0.242678	2	Liver	eQTL
LOC101803753	12_12587773	0.991602	0.0669456	2	Liver	eQTL
LOC101804141	12_12221779	1	0.118143	1	Liver	eQTL
CALB2	12_12620968	1	0.0405983	2	Liver	eQTL
LOC106018996	12_12587773	0.973331	0.0669456	2	Liver	eQTL
ST3GAL2	12_12886085	0.999918	0.0329218	2	Liver	eQTL
LOC101792018	12_13621110	0.968132	0.154661	1	Liver	eQTL
FBXL8	12_13580415	0.992295	0.205021	1	Liver	eQTL
LOC101797616	12_14695021	0.99661	0.0323276	2	Liver	eQTL
FTO	12_15805948	0.998136	0.0337302	1	Liver	eQTL
FTO	12_15887528	1	0.317797	2	Liver	eQTL
LONP2	12_18750965	0.936688	0.0995851	1	Liver	eQTL
LOC101792714	12_19824024	0.949625	0.387234	1	Liver	eQTL
TMCC1	13_468526	0.999977	0.226695	1	Liver	eQTL
MBD4	13_599333	0.999819	0.1375	1	Liver	eQTL
LOC119718295	13_955708	0.981124	0.202128	2	Liver	eQTL
LOC101792450	13_2016424	0.999336	0.0550847	2	Liver	eQTL
LOC101794070	13_2133711	0.920231	0.287234	1	Liver	eQTL
LOC101794070	13_1773043	0.987593	0.14346	3	Liver	eQTL
LOC119712991	13_2133711	0.982296	0.287234	1	Liver	eQTL
LOC119712991	13_1843501	0.999677	0.132911	2	Liver	eQTL
LOC119712991	13_2353684	0.992619	0.0330579	3	Liver	eQTL
LOC119712998	13_1837674	0.985519	0.148069	1	Liver	eQTL
LOC119712998	13_2133711	0.999968	0.287234	2	Liver	eQTL
LOC119718241	13_3394996	0.991761	0.0895833	1	Liver	eQTL
LOC119718232	13_8750720	0.943728	0.134538	1	Liver	eQTL
LOC119718225	13_8791042	0.999556	0.226891	1	Liver	eQTL
LOC119718225	13_8787597	0.962148	0.381356	2	Liver	eQTL
LOC119718228	13_8791042	1	0.226891	1	Liver	eQTL
LOC119718228	13_8778975	0.999997	0.299603	2	Liver	eQTL
FHIT	13_8306020	0.917676	0.216102	1	Liver	eQTL
KCTD6	13_9480308	0.999872	0.0291667	1	Liver	eQTL
HTD2	13_9770238	0.938168	0.334764	1	Liver	eQTL
LOC106019345	13_9804053	0.997071	0.0645161	1	Liver	eQTL
SLC25A20	13_9797748	0.949685	0.448276	1	Liver	eQTL
IMPDH2	13_9912372	0.982534	0.118026	1	Liver	eQTL
LOC113845026	13_10187161	0.981117	0.105485	1	Liver	eQTL
LOC101797798	13_10339899	1	0.19958	2	Liver	eQTL
LOC119718217	13_10134468	0.938056	0.446581	1	Liver	eQTL
LOC110353874	13_10000142	1	0.0651261	1	Liver	eQTL
CHCHD6	13_11937869	0.99998	0.169528	1	Liver	eQTL
CHCHD6	13_11932855	0.992325	0.175214	2	Liver	eQTL
COPG1	13_12676112	0.999726	0.385776	1	Liver	eQTL
ABHD14A	13_13414140	0.971297	0.301282	1	Liver	eQTL
HYAL1	13_15132937	0.97691	0.274059	1	Liver	eQTL
LOC101797614	13_15028181	0.999994	0.0595745	1	Liver	eQTL
GLT8D1	13_15037207	0.998798	0.0897959	1	Liver	eQTL
SMIM4	13_15296468	0.970212	0.349576	1	Liver	eQTL
LOC101799201	13_15389341	0.996803	0.0375	1	Liver	eQTL
LOC119718281	13_15294815	0.986015	0.179916	1	Liver	eQTL
TEX264	13_15807326	0.901271	0.0882353	2	Liver	eQTL
GPX1	13_16041103	0.946664	0.0801688	2	Liver	eQTL
MST1R	13_16665994	0.969074	0.0699588	1	Liver	eQTL
CAMKV	13_16135655	0.999946	0.0979592	1	Liver	eQTL
RAB43	13_18805985	0.999666	0.117021	1	Liver	eQTL
LOC110352140	13_20086355	0.974658	0.0251046	2	Liver	eQTL
LOC106016029	13_19915798	0.993337	0.041841	1	Liver	eQTL
EGR1	14_774786	0.99983	0.034413	1	Liver	eQTL
PRELID2	14_813632	0.924097	0.0404858	3	Liver	eQTL
GDF9	14_1529094	0.999448	0.182773	1	Liver	eQTL
DCTN4	14_5949404	0.924978	0.103306	1	Liver	eQTL
GM2A	14_6061748	0.92246	0.276639	1	Liver	eQTL
GM2A	14_5991723	0.983889	0.056962	2	Liver	eQTL
FAXDC2	14_7115552	0.987058	0.214286	2	Liver	eQTL
FAXDC2	14_6848186	0.997538	0.0371901	3	Liver	eQTL
THG1L	14_8455953	0.912861	0.109705	2	Liver	eQTL
LOC119718349	14_9247205	1	0.115385	1	Liver	eQTL
LOC119718349	14_9268890	1	0.0595745	2	Liver	eQTL
LOC119718349	14_10076057	0.999115	0.0367347	3	Liver	eQTL
CPLX2	14_9193195	0.999422	0.123404	1	Liver	eQTL
CPLX2	14_9247205	0.99964	0.115385	2	Liver	eQTL
CDHR2	14_9096944	0.901003	0.0315126	1	Liver	eQTL
BOD1	14_10785253	0.999301	0.293617	1	Liver	eQTL
LOC119718400	14_11414410	0.999944	0.0669456	1	Liver	eQTL
LOC119718400	14_11691679	0.945141	0.0146444	2	Liver	eQTL
LOC113845171	14_12358279	0.998381	0.0871369	1	Liver	eQTL
LOC113845171	14_12360847	0.987684	0.150424	3	Liver	eQTL
HARS1	14_12415275	0.979544	0.177489	1	Liver	eQTL
LOC101796127	14_12972454	1	0.0421941	1	Liver	eQTL
LOC119718393	14_12181992	0.973342	0.0777311	1	Liver	eQTL
LOC119718386	14_12617914	0.999958	0.0668103	1	Liver	eQTL
LOC101795547	14_13575809	0.999905	0.366525	2	Liver	eQTL
DELE1	14_13497477	0.983316	0.313559	1	Liver	eQTL
FGF18	14_15122747	1	0.0502092	1	Liver	eQTL
CCNG1	14_17735933	0.993728	0.0489796	1	Liver	eQTL
LOC106015182	14_20589075	0.999039	0.0829787	2	Liver	eQTL
LOC119718426	15_596101	0.992256	0.37069	1	Liver	eQTL
MRPS34	15_2285500	0.99233	0.271008	1	Liver	eQTL
NAGPA	15_4875857	0.907125	0.469697	1	Liver	eQTL
EEF2KMT	15_4847887	0.99918	0.489362	1	Liver	eQTL
EEF2KMT	15_4875259	0.995092	0.472222	2	Liver	eQTL
ABCA3	15_5151971	0.988673	0.059322	2	Liver	eQTL
TEDC2	15_4491522	0.908483	0.252083	2	Liver	eQTL
EME2	15_5644808	0.997209	0.0741525	1	Liver	eQTL
NME3	15_5548256	0.959546	0.169528	2	Liver	eQTL
ANTKMT	15_5563795	0.991719	0.277778	1	Liver	eQTL
JMJD8	15_5919627	0.95783	0.212766	3	Liver	eQTL
ECI1	15_7401872	0.992124	0.133891	1	Liver	eQTL
ECI1	15_6500805	0.965287	0.0743802	2	Liver	eQTL
PGAP6	15_6825995	0.908924	0.292208	1	Liver	eQTL
LOC101804322	15_8352281	0.906636	0.110879	1	Liver	eQTL
TMC5	15_9373210	0.987406	0.067623	1	Liver	eQTL
TMC5	15_9233234	0.998508	0.212185	2	Liver	eQTL
GDE1	15_9237944	0.97089	0.148305	2	Liver	eQTL
GPRC5B	15_9812227	0.96194	0.114407	1	Liver	eQTL
LOC101793832	15_9798484	0.956486	0.170259	1	Liver	eQTL
ANKS4B	15_9545052	0.999974	0.416667	1	Liver	eQTL
PDZD9	15_9592291	0.999975	0.151452	1	Liver	eQTL
DAGLB	15_9896125	0.972862	0.291667	1	Liver	eQTL
TMEM130	15_11681479	0.982359	0.0403226	1	Liver	eQTL
DNAAF5	15_11677203	0.980823	0.0683761	1	Liver	eQTL
TMEM184A	15_11792405	0.980271	0.120332	1	Liver	eQTL
LOC110352475	15_14434047	0.999703	0.134454	1	Liver	eQTL
LOC110352475	15_15001529	0.973576	0.0308642	2	Liver	eQTL
FLCN	15_14645823	0.906794	0.171488	1	Liver	eQTL
PEMT	15_14534259	0.95751	0.223176	1	Liver	eQTL
LOC119718424	15_15958720	0.996573	0.0508475	1	Liver	eQTL
LOC119718424	15_15957593	0.972481	0.056962	2	Liver	eQTL
MSRB1	15_16349135	0.968293	0.0268595	1	Liver	eQTL
MSRB1	15_16276879	0.999307	0.334052	2	Liver	eQTL
GFER	15_16223553	0.983704	0.245763	1	Liver	eQTL
NTHL1	15_16332533	0.998405	0.262712	1	Liver	eQTL
NTHL1	15_16433265	0.955562	0.183544	3	Liver	eQTL
RAB26	15_16161837	0.992333	0.026971	1	Liver	eQTL
LOC101799820	15_16541507	0.999379	0.0489796	1	Liver	eQTL
LOC113845227	15_16572667	0.999926	0.257447	1	Liver	eQTL
LOC101805036	15_16593233	0.989304	0.0612245	1	Liver	eQTL
HS3ST2	15_17258547	1	0.187764	1	Liver	eQTL
HS3ST2	15_17252589	0.999588	0.23251	2	Liver	eQTL
NSMCE1	15_17576457	0.981848	0.403292	1	Liver	eQTL
ASPHD2	16_956923	1	0.0546218	1	Liver	eQTL
CRYBB3	16_1335274	0.953161	0.026749	1	Liver	eQTL
CRYBB3	16_956831	0.997087	0.0319149	2	Liver	eQTL
DAO	16_1667617	0.962451	0.0392562	1	Liver	eQTL
ISCU	16_1734705	0.995825	0.265086	1	Liver	eQTL
ACAD10	16_2064009	0.991641	0.147773	1	Liver	eQTL
CAMKK2	16_2872412	0.979995	0.208155	1	Liver	eQTL
C16H12orf65	16_3570384	0.999836	0.346154	1	Liver	eQTL
C16H12orf65	16_3575720	0.978364	0.446581	2	Liver	eQTL
LOC106015962	16_3501681	0.96383	0.443038	2	Liver	eQTL
P2RX6	16_4546226	0.998824	0.391026	2	Liver	eQTL
P2RX6	16_4539862	0.950891	0.202083	3	Liver	eQTL
TCN2	16_5402857	0.993795	0.167373	1	Liver	eQTL
LOC101805413	16_5463941	0.999999	0.343348	1	Liver	eQTL
LOC113845321	16_5463941	0.999914	0.343348	1	Liver	eQTL
FBXW8	16_6260689	0.946406	0.259657	1	Liver	eQTL
LOC101805192	16_5755013	0.999987	0.0297872	1	Liver	eQTL
LOC119718487	16_5755013	1	0.0297872	1	Liver	eQTL
LOC119718487	16_6126918	0.977744	0.151639	2	Liver	eQTL
RPLP0	16_8058293	0.975004	0.311966	1	Liver	eQTL
GATC	16_8071943	0.998029	0.311688	1	Liver	eQTL
COQ5	16_8061191	0.992317	0.33195	2	Liver	eQTL
MLEC	16_8091220	0.985474	0.452586	2	Liver	eQTL
ACADS	16_8182718	0.996757	0.123457	1	Liver	eQTL
KLHL22	16_9195370	0.923137	0.438034	1	Liver	eQTL
LOC113845339	16_8936756	0.989679	0.0514403	1	Liver	eQTL
LOC106017603	16_9796522	0.962189	0.223404	1	Liver	eQTL
LOC113845326	16_9997327	0.998622	0.288462	1	Liver	eQTL
PUS1	16_12863580	0.97094	0.258547	2	Liver	eQTL
MMP17	16_13171609	0.904991	0.328326	1	Liver	eQTL
LOC113841252	17_85484	0.98618	0.0966387	1	Liver	eQTL
LOC113841252	17_65016	1	0.425214	2	Liver	eQTL
LOC113845379	17_26968	0.989977	0.324894	1	Liver	eQTL
LOC119718653	17_65016	0.999711	0.425214	1	Liver	eQTL
LOC101797323	17_465917	1	0.0344828	1	Liver	eQTL
LOC101797323	17_419272	0.998082	0.0502092	2	Liver	eQTL
LOC113845375	17_123929	1	0.0492126	1	Liver	eQTL
LOC113845380	17_123907	0.971499	0.110672	1	Liver	eQTL
LOC113845374	17_182980	0.999734	0.497863	1	Liver	eQTL
LOC113845388	17_175630	1	0.118367	1	Liver	eQTL
LOC113845388	17_959576	0.999587	0.0643153	2	Liver	eQTL
LOC113845388	17_529173	0.941302	0.0805785	3	Liver	eQTL
LOC101796643	17_175630	0.999944	0.118367	1	Liver	eQTL
LOC101796643	17_959576	0.963589	0.0643153	2	Liver	eQTL
LOC119718691	17_123929	1	0.0492126	1	Liver	eQTL
LOC113845378	17_183988	1	0.0368852	1	Liver	eQTL
LOC113845378	17_62531	0.98598	0.0458333	2	Liver	eQTL
LOC106019355	17_191338	0.997458	0.0574468	2	Liver	eQTL
LOC119718675	17_123915	0.976153	0.0492126	2	Liver	eQTL
LOC119718688	17_123929	1	0.0492126	1	Liver	eQTL
LOC119718683	17_62499	0.984631	0.0840336	1	Liver	eQTL
LOC119718683	17_194892	0.991237	0.0683761	2	Liver	eQTL
LOC119718682	17_938989	0.910607	0.0404255	1	Liver	eQTL
LOC119718697	17_455458	0.946087	0.0462185	1	Liver	eQTL
LOC119718681	17_579189	0.9439	0.0542169	1	Liver	eQTL
LOC119718674	17_183559	0.997577	0.048583	3	Liver	eQTL
LOC101792441	17_434221	0.995771	0.0414938	1	Liver	eQTL
LOC101791534	17_462113	0.963312	0.0785124	1	Liver	eQTL
LOC113845394	17_955144	0.99988	0.0648536	1	Liver	eQTL
LOC110351189	17_719496	1	0.0512821	1	Liver	eQTL
LOC110351189	17_529417	0.984125	0.10084	2	Liver	eQTL
LOC110354662	17_719496	1	0.0512821	1	Liver	eQTL
LOC110354662	17_574743	1	0.031746	2	Liver	eQTL
LOC119718686	17_895035	0.912086	0.0365854	1	Liver	eQTL
LOC113845401	17_719496	1	0.0512821	1	Liver	eQTL
LOC113845401	17_463578	0.998076	0.0317797	2	Liver	eQTL
LOC119718661	17_912881	0.966242	0.257447	2	Liver	eQTL
LOC106020611	17_1016408	1	0.0589431	1	Liver	eQTL
LOC106020611	17_1024050	0.995448	0.0382979	2	Liver	eQTL
LOC119713038	17_924240	1	0.0956175	1	Liver	eQTL
LOC119713038	17_455105	0.953111	0.0384615	2	Liver	eQTL
LOC119713014	17_988960	0.999778	0.11157	1	Liver	eQTL
LOC101790497	17_927232	1	0.136719	1	Liver	eQTL
LOC101790497	17_580036	0.999729	0.0423387	2	Liver	eQTL
LOC119718657	17_924240	0.999999	0.0956175	1	Liver	eQTL
LOC113841510	17_924240	0.999985	0.0956175	2	Liver	eQTL
LOC119718687	17_927232	0.999968	0.136719	2	Liver	eQTL
LOC113845410	17_924240	1	0.0956175	1	Liver	eQTL
LOC119718672	17_924240	1	0.0956175	2	Liver	eQTL
LOC119718664	17_875191	0.954533	0.10119	3	Liver	eQTL
LOC119718664	17_1039624	0.998855	0.119919	4	Liver	eQTL
LOC119718696	17_527970	0.994646	0.0311203	1	Liver	eQTL
LOC119718689	17_953133	0.977666	0.0907173	1	Liver	eQTL
LOC119718662	17_723747	0.954232	0.0588235	1	Liver	eQTL
LOC119718668	17_1015118	0.999581	0.0430328	1	Liver	eQTL
LOC101797869	17_721767	0.999612	0.0564516	2	Liver	eQTL
LOC101797869	17_927232	0.999269	0.136719	3	Liver	eQTL
LOC119718659	17_578992	1	0.294715	1	Liver	eQTL
LOC119718693	17_927232	1	0.136719	1	Liver	eQTL
LOC119718693	17_1080830	0.998043	0.166667	2	Liver	eQTL
LOC113841481	17_528945	0.999902	0.109914	1	Liver	eQTL
LOC119718711	17_1036012	0.997955	0.0436508	1	Liver	eQTL
LOC101803957	18_675984	0.999997	0.197095	1	Liver	eQTL
LOC101800035	18_196255	0.99829	0.0285714	2	Liver	eQTL
LOC101796222	18_1054629	0.935203	0.22479	1	Liver	eQTL
POLE3	18_1770456	0.98921	0.0635246	1	Liver	eQTL
ALAD	18_1799120	0.914364	0.0840517	1	Liver	eQTL
SLC31A1	18_1936424	0.978253	0.237288	2	Liver	eQTL
RPL12	18_1910204	0.937206	0.0524194	1	Liver	eQTL
ANAPC2	18_2154476	0.901091	0.282979	1	Liver	eQTL
CACNA1B	18_2665539	1	0.0735294	1	Liver	eQTL
LOC113845475	18_5482430	0.999999	0.15272	1	Liver	eQTL
DPM2	18_5632364	0.997686	0.14346	1	Liver	eQTL
COQ4	18_5747100	0.996459	0.174274	1	Liver	eQTL
LOC113845484	18_6339902	0.999253	0.0458333	1	Liver	eQTL
DBH	18_6214169	0.999977	0.0402542	1	Liver	eQTL
DBH	18_6375356	0.980218	0.0361702	2	Liver	eQTL
ADAMTSL2	18_6655710	0.941919	0.0323887	2	Liver	eQTL
ADAMTSL2	18_6803965	1	0.0162602	3	Liver	eQTL
STKLD1	18_6779022	0.999962	0.0307377	1	Liver	eQTL
LOC113845435	18_6978802	0.997708	0.0392562	2	Liver	eQTL
AIF1L	18_7694585	0.999999	0.434599	1	Liver	eQTL
AIF1L	18_7683076	0.988613	0.361925	2	Liver	eQTL
LOC101792364	18_8161382	0.987506	0.135417	1	Liver	eQTL
MIGA2	18_8427944	0.997548	0.0614754	1	Liver	eQTL
ODF2	18_8658814	0.961675	0.097166	1	Liver	eQTL
GPSM1	18_9071703	0.978838	0.144309	1	Liver	eQTL
C5	18_9578846	0.999777	0.319915	1	Liver	eQTL
LOC101792161	18_9635645	0.987875	0.0847458	1	Liver	eQTL
LOC106020186	18_9658728	0.924499	0.352814	1	Liver	eQTL
PTGS1	18_10051353	0.999454	0.134615	1	Liver	eQTL
PTGS1	18_10120931	0.999961	0.191983	2	Liver	eQTL
PTGS1	18_10219841	0.919651	0.364807	3	Liver	eQTL
RABEPK	18_11025743	0.908931	0.420502	1	Liver	eQTL
LOC119713243	19_391699	0.999873	0.4	1	Liver	eQTL
LOC113845562	19_423915	0.971499	0.0378151	1	Liver	eQTL
TIMP2	19_775080	0.993908	0.112971	1	Liver	eQTL
LOC119713156	19_594229	0.999999	0.0379747	1	Liver	eQTL
LOC119713156	19_930202	0.998378	0.144681	2	Liver	eQTL
COG1	19_2418868	0.951028	0.106695	2	Liver	eQTL
SLC39A11	19_1966000	0.999607	0.185345	1	Liver	eQTL
APOH	19_3381638	0.981428	0.0580913	1	Liver	eQTL
CACNG4	19_4083275	0.983278	0.0809129	1	Liver	eQTL
MRPL27	19_3819112	0.999723	0.144681	1	Liver	eQTL
STXBP4	19_5361752	0.999926	0.483122	1	Liver	eQTL
LOC101795049	19_5619578	0.994178	0.424051	1	Liver	eQTL
LOC113845558	19_6542523	0.994627	0.464435	1	Liver	eQTL
FN3K	19_7204582	0.938505	0.24477	1	Liver	eQTL
RAB40B	19_7388782	0.994897	0.0681818	2	Liver	eQTL
LOC119713226	19_7448082	0.954925	0.217672	1	Liver	eQTL
OGFOD3	19_7447045	0.993678	0.0903361	1	Liver	eQTL
LOC106016586	19_7147236	0.980807	0.0557851	1	Liver	eQTL
LOC106016586	19_7777913	0.998228	0.174468	3	Liver	eQTL
ST6GALNAC2	19_8365070	0.988044	0.158333	1	Liver	eQTL
FBF1	19_8536664	0.998601	0.237179	2	Liver	eQTL
MRPL38	19_8731776	0.99995	0.193133	1	Liver	eQTL
GALK1	19_8842253	0.997882	0.299569	1	Liver	eQTL
ARMC7	19_9226084	0.966078	0.32906	1	Liver	eQTL
ARMC7	19_9331879	0.934901	0.109705	2	Liver	eQTL
FADS6	19_9487011	0.999597	0.259574	1	Liver	eQTL
LOC110351402	19_9605377	0.981999	0.0809128	1	Liver	eQTL
LOC110351402	19_9606945	0.953103	0.22103	2	Liver	eQTL
LOC110351399	19_9608126	0.993115	0.0909091	1	Liver	eQTL
LOC106019328	19_10247180	0.952126	0.0983264	1	Liver	eQTL
DNAH9	19_11514590	0.995493	0.0893617	1	Liver	eQTL
ELAC2	19_12574307	0.959783	0.5	1	Liver	eQTL
LOC119713284	20_523575	0.981298	0.0726141	1	Liver	eQTL
RAP1GAP2	20_643961	0.994591	0.0595745	1	Liver	eQTL
CCDC92B	20_446521	1	0.165306	1	Liver	eQTL
CCDC92B	20_606923	0.918089	0.0851064	2	Liver	eQTL
IFT20	20_431963	0.946706	0.23176	1	Liver	eQTL
KSR1	20_988999	0.985256	0.220779	1	Liver	eQTL
LOC119713304	20_2542056	0.993471	0.209544	1	Liver	eQTL
LOC119713258	20_2471804	0.99997	0.258621	1	Liver	eQTL
LOC119713258	20_2540457	0.988037	0.197034	2	Liver	eQTL
PRR11	20_3763136	0.989563	0.0774059	1	Liver	eQTL
LOC119713271	20_3917756	0.999281	0.225207	1	Liver	eQTL
LOC119713271	20_3857647	0.999947	0.336134	2	Liver	eQTL
LOC119713271	20_3349128	0.975358	0.360169	3	Liver	eQTL
ASPA	20_4059404	0.999922	0.276087	1	Liver	eQTL
SHPK	20_3907952	0.911753	0.0566802	2	Liver	eQTL
EMC6	20_4203085	0.997324	0.391949	1	Liver	eQTL
LOC101799068	20_4211958	0.994858	0.354978	1	Liver	eQTL
CPD	20_4678703	0.927765	0.105691	1	Liver	eQTL
TMIGD1	20_4616533	0.993102	0.175966	1	Liver	eQTL
TMIGD1	20_4675429	0.985781	0.0776892	2	Liver	eQTL
BLMH	20_4629477	0.982969	0.0622318	1	Liver	eQTL
PIPOX	20_5009068	0.999526	0.145299	1	Liver	eQTL
TMEM199	20_5364372	0.991781	0.188559	1	Liver	eQTL
LOC101798761	20_5822362	0.959701	0.0430328	1	Liver	eQTL
INPP5K	20_5740915	0.990955	0.467391	1	Liver	eQTL
ASL	20_6047850	0.999968	0.0668016	1	Liver	eQTL
LOC101795435	20_7008865	0.966799	0.278017	1	Liver	eQTL
LOC101795435	20_7040624	0.961543	0.0315126	2	Liver	eQTL
ALKBH4	20_7135986	0.99456	0.0433884	1	Liver	eQTL
LOC101794290	20_8038367	0.995103	0.0357143	2	Liver	eQTL
IFT22	20_7372634	0.965525	0.0945378	2	Liver	eQTL
LOC101793930	20_7841757	0.9884	0.313043	1	Liver	eQTL
RCC1L	20_8434954	0.907185	0.0670996	1	Liver	eQTL
RCC1L	20_8806547	0.997509	0.261702	3	Liver	eQTL
SBDS	20_11148371	0.960533	0.101266	1	Liver	eQTL
ABHD11	20_11450232	0.999971	0.240891	1	Liver	eQTL
ABHD11	20_11085825	0.997392	0.112245	3	Liver	eQTL
LOC101789899	20_10975034	0.956546	0.0397489	1	Liver	eQTL
LOC106016000	21_596847	0.966954	0.0645161	1	Liver	eQTL
SLC2A10	21_1782939	0.914522	0.046371	1	Liver	eQTL
FITM2	21_1897433	0.959238	0.0473251	1	Liver	eQTL
PXMP4	21_3502615	0.999587	0.145228	1	Liver	eQTL
MYH7B	21_3947382	0.962926	0.0355649	1	Liver	eQTL
GSS	21_4445318	1	0.0309917	1	Liver	eQTL
MYBL2	21_5001531	1	0.377729	1	Liver	eQTL
SGK2	21_5004169	1	0.224138	1	Liver	eQTL
BMP7	21_9704676	0.993137	0.204545	1	Liver	eQTL
BMP7	21_9346111	0.962319	0.0886076	2	Liver	eQTL
FAM210B	21_9677362	0.974694	0.276371	1	Liver	eQTL
KCNG1	21_11415671	0.999425	0.351293	1	Liver	eQTL
DPM1	21_11522243	0.992143	0.285408	1	Liver	eQTL
AAR2	21_12201105	0.99276	0.4	1	Liver	eQTL
NDRG3	21_12368807	0.975592	0.372881	3	Liver	eQTL
LOC113845738	21_13029215	0.997455	0.441057	1	Liver	eQTL
LOC119713377	21_13443553	0.997358	0.0946502	1	Liver	eQTL
LOC101800845	21_13828829	0.999996	0.280851	1	Liver	eQTL
LOC101800841	21_15612468	0.982114	0.0847458	2	Liver	eQTL
COMMD7	21_16180399	0.930947	0.305556	1	Liver	eQTL
DNMT3B	21_16187823	0.999781	0.195833	1	Liver	eQTL
LOC113845749	21_16274980	0.974639	0.147541	1	Liver	eQTL
LOC101799803	21_16323145	1	0.124464	1	Liver	eQTL
SPINT4	21_16392082	0.999364	0.0548523	1	Liver	eQTL
TNNC2	21_16642388	1	0.0288066	1	Liver	eQTL
TNNC2	21_16682355	1	0.0262097	2	Liver	eQTL
LOC113845729	21_16557404	0.997609	0.178723	2	Liver	eQTL
ERRFI1	22_2084635	0.914107	0.0348361	1	Liver	eQTL
LOC119713438	22_2348956	0.969264	0.177083	1	Liver	eQTL
H6PD	22_3980287	0.999096	0.465517	1	Liver	eQTL
NMNAT1	22_4282822	0.999427	0.233193	2	Liver	eQTL
DRAXIN	22_5938442	0.999668	0.065678	1	Liver	eQTL
DRAXIN	22_5259315	0.934	0.321121	2	Liver	eQTL
C22H1orf167	22_5259315	0.930661	0.321121	1	Liver	eQTL
LOC113839714	22_5572794	0.999906	0.268085	2	Liver	eQTL
LRRC38	22_5439089	0.940675	0.164583	1	Liver	eQTL
TMEM51	22_5988593	0.99887	0.0987395	1	Liver	eQTL
CASP9	22_6031719	0.999998	0.28178	1	Liver	eQTL
AGMAT	22_6062446	0.996513	0.0854167	1	Liver	eQTL
PINK1	22_6056939	0.999926	0.355319	1	Liver	eQTL
CDA	22_6177431	0.967292	0.105932	3	Liver	eQTL
RNF186	22_6487151	0.999995	0.0294118	1	Liver	eQTL
EPHB2	22_7118874	0.975248	0.0292887	2	Liver	eQTL
MRTO4	22_6696257	0.990617	0.324153	1	Liver	eQTL
LOC113839698	22_7634253	0.990159	0.10084	1	Liver	eQTL
LOC113839698	22_7254598	0.989746	0.046371	2	Liver	eQTL
GOLGA7	23_253031	0.986518	0.419492	1	Liver	eQTL
IDO2	23_501543	0.910696	0.308696	1	Liver	eQTL
LOC101791193	23_552365	0.992466	0.288703	1	Liver	eQTL
LOC106020033	23_552365	0.995368	0.288703	1	Liver	eQTL
TM2D2	23_601319	0.997665	0.0770833	1	Liver	eQTL
PLPBP	23_889303	0.957474	0.131356	1	Liver	eQTL
FAM136A	23_4238478	0.998365	0.0439331	1	Liver	eQTL
FAM136A	23_4141846	0.985389	0.163755	2	Liver	eQTL
PCYOX1	23_4085578	0.988237	0.0284553	1	Liver	eQTL
PCYOX1	23_4266841	0.97503	0.125	3	Liver	eQTL
CKAP2L	23_3572389	0.973602	0.0340426	1	Liver	eQTL
RCAN3	24_344766	0.996655	0.107287	1	Liver	eQTL
NIPAL3	24_390101	0.997973	0.0368852	1	Liver	eQTL
LOC119713595	24_355622	0.99124	0.201681	1	Liver	eQTL
LOC119713638	24_505975	0.95534	0.0314961	2	Liver	eQTL
LOC119713624	24_532180	0.999901	0.0873984	1	Liver	eQTL
LOC119713626	24_589366	0.997388	0.0926724	1	Liver	eQTL
SMIM12	24_1544537	0.958922	0.0381356	2	Liver	eQTL
LOC113839771	24_2010014	0.999419	0.125	1	Liver	eQTL
LOC113839771	24_2190011	0.989275	0.037037	2	Liver	eQTL
EVA1B	24_2923162	0.997149	0.0433884	2	Liver	eQTL
MRPS15	24_2466773	0.999507	0.339662	1	Liver	eQTL
PAQR7	24_3405039	0.944587	0.105809	1	Liver	eQTL
STMN1	24_3436776	0.995692	0.10251	1	Liver	eQTL
EXTL1	24_3599619	0.985177	0.334783	1	Liver	eQTL
SLC30A2	24_3456947	0.999064	0.154008	1	Liver	eQTL
LOC119713607	24_4053920	0.999855	0.0389344	1	Liver	eQTL
LOC119713607	24_3981577	0.917599	0.123431	2	Liver	eQTL
RCC1	24_4187138	0.965518	0.0532787	1	Liver	eQTL
SMPDL3B	24_6830564	0.993971	0.277311	2	Liver	eQTL
EI24	25_521035	0.955386	0.0506329	1	Liver	eQTL
ARHGAP32	25_1744740	0.973073	0.12931	1	Liver	eQTL
LOC113839830	25_4032858	0.990741	0.0386266	1	Liver	eQTL
JHY	25_5138933	0.997872	0.0378151	1	Liver	eQTL
DPAGT1	25_5516871	0.976611	0.26971	1	Liver	eQTL
APOA1	25_5658569	0.993542	0.0758197	1	Liver	eQTL
PCSK7	25_6656911	0.942352	0.107143	1	Liver	eQTL
LOC113839874	26_334282	0.978497	0.15	1	Liver	eQTL
LOC113839874	26_335623	0.994432	0.102564	2	Liver	eQTL
ECM1	26_422070	0.996837	0.0311203	1	Liver	eQTL
LOC119713729	26_524115	0.98399	0.26383	1	Liver	eQTL
LOC119713809	26_804417	0.999905	0.261603	1	Liver	eQTL
LOC119713809	26_804597	0.998042	0.0531915	2	Liver	eQTL
LOC119713853	26_804417	1	0.261603	1	Liver	eQTL
LOC119713853	26_804376	0.999998	0.0696202	2	Liver	eQTL
LOC119712979	26_1135296	0.994298	0.196203	1	Liver	eQTL
GABPB2	26_1291499	0.963367	0.314583	1	Liver	eQTL
HAX1	26_2488179	0.964767	0.0381356	2	Liver	eQTL
LOC119713767	26_2577199	1	0.215812	1	Liver	eQTL
LOC119713767	26_2542534	0.999456	0.110169	2	Liver	eQTL
LOC119713768	26_2635025	0.990929	0.0576132	1	Liver	eQTL
RIT1	26_2626650	0.964805	0.401709	1	Liver	eQTL
LOC119713744	26_3031803	0.999945	0.0436508	1	Liver	eQTL
LOC119714000	27_262007	1	0.0361702	1	Liver	eQTL
LOC119714000	27_806637	1	0.0316456	2	Liver	eQTL
LOC119713937	27_590248	0.981741	0.308511	1	Liver	eQTL
LOC119713936	27_270187	0.998476	0.0479167	1	Liver	eQTL
LOC119713991	27_1041633	1	0.0368852	1	Liver	eQTL
LOC119713991	27_1469078	0.999976	0.0363248	2	Liver	eQTL
LOC119713930	27_448758	0.997219	0.261905	1	Liver	eQTL
SORT1	27_768030	0.956093	0.248945	1	Liver	eQTL
PACSIN1	27_1464898	0.999988	0.19958	2	Liver	eQTL
PACSIN1	27_1608609	0.969196	0.17382	3	Liver	eQTL
LHFPL5	27_1932448	0.998407	0.227848	1	Liver	eQTL
LHFPL5	27_2067004	0.986995	0.0609244	2	Liver	eQTL
SRPK1	27_2016473	0.916538	0.0822511	2	Liver	eQTL
SLC26A8	27_1967262	0.999957	0.495745	1	Liver	eQTL
LOC101790356	27_3065153	1	0.135983	1	Liver	eQTL
TAF8	27_3264185	0.969291	0.0743802	1	Liver	eQTL
TAF8	27_3065153	0.999493	0.135983	2	Liver	eQTL
MED20	27_3217145	0.928533	0.192308	1	Liver	eQTL
NUCKS1	27_4503556	0.999528	0.180672	1	Liver	eQTL
LOC119713971	27_4256962	0.997284	0.0456432	2	Liver	eQTL
LOC119713971	27_4749421	0.975931	0.107296	3	Liver	eQTL
KCND3	27_5021752	1	0.313305	1	Liver	eQTL
LOC119713993	27_5022822	0.999286	0.0764463	1	Liver	eQTL
LOC119713993	27_5184101	0.978532	0.0717213	2	Liver	eQTL
C27H6orf132	27_5275444	0.979433	0.0433884	2	Liver	eQTL
LOC119712954	27_6456300	0.956278	0.0958333	1	Liver	eQTL
CDK5RAP3	28_540292	1	0.134043	1	Liver	eQTL
GRB7	28_1176903	0.999991	0.0538793	1	Liver	eQTL
FAM117A	28_1477713	0.96814	0.22766	1	Liver	eQTL
FAM117A	28_1461396	0.999899	0.182203	2	Liver	eQTL
DUSP3	28_1604393	0.994415	0.131356	1	Liver	eQTL
LOC110353895	28_1456318	0.963786	0.0531915	2	Liver	eQTL
PTGES3L	28_1786167	0.970674	0.271186	1	Liver	eQTL
LOC101791669	28_1870338	0.996135	0.180498	2	Liver	eQTL
LOC119714042	28_2396380	0.989468	0.0965665	1	Liver	eQTL
FKBP10	28_2522028	1	0.0948276	1	Liver	eQTL
FKBP10	28_2523230	0.995281	0.156652	2	Liver	eQTL
P3H4	28_2522028	1	0.0948276	1	Liver	eQTL
LOC101794709	28_2067820	1	0.0446809	1	Liver	eQTL
LOC113840025	28_2721355	0.937325	0.440928	1	Liver	eQTL
LOC119714014	28_4128426	0.999991	0.214	1	Liver	eQTL
LOC119714014	28_4152360	0.998516	0.163347	2	Liver	eQTL
LOC119714025	28_4167254	0.990807	0.10757	1	Liver	eQTL
LOC119714025	28_4127518	0.999987	0.129412	2	Liver	eQTL
LOC119714140	28_3968178	0.999999	0.0327869	1	Liver	eQTL
LOC106020188	28_4766978	0.964143	0.344	1	Liver	eQTL
LOC106020188	28_4781549	0.99967	0.0686695	2	Liver	eQTL
LOC101800206	28_5046271	0.999619	0.38247	1	Liver	eQTL
LOC101804340	28_4951301	0.939878	0.230469	1	Liver	eQTL
LOC119714137	28_5046271	0.999964	0.38247	1	Liver	eQTL
LOC119714049	28_6078238	0.968834	0.128205	2	Liver	eQTL
LOC101791362	28_5920936	0.999899	0.0729614	2	Liver	eQTL
LOC119714177	28_6221729	0.995819	0.31681	1	Liver	eQTL
LOC110353789	28_5962867	0.989265	0.0345528	2	Liver	eQTL
HSD11B1L	29_105864	0.986839	0.374468	1	Liver	eQTL
PLPP2	29_214664	0.975138	0.273305	1	Liver	eQTL
ABCA7	29_552668	0.999962	0.0454545	1	Liver	eQTL
POLR2E	29_555535	0.982314	0.127119	1	Liver	eQTL
SBNO2	29_1273199	1	0.0361702	1	Liver	eQTL
ATP5F1D	29_645339	0.94326	0.151899	1	Liver	eQTL
ATP5F1D	29_652058	0.922419	0.150826	2	Liver	eQTL
C29H19orf25	29_853469	0.999816	0.329787	1	Liver	eQTL
THOP1	29_920250	0.992067	0.0829787	1	Liver	eQTL
MRPL34	29_1083015	0.988755	0.189076	1	Liver	eQTL
LOC119714237	29_729952	0.999981	0.022	1	Liver	eQTL
LOC101802819	29_1302030	0.921025	0.0801688	1	Liver	eQTL
COPE	29_1467311	0.99797	0.147679	1	Liver	eQTL
REX1BD	29_1654319	0.996976	0.0404255	1	Liver	eQTL
LSM4	29_1764275	0.99581	0.189362	1	Liver	eQTL
LSM4	29_1757332	0.973985	0.355319	2	Liver	eQTL
TICAM1	29_2867678	0.992352	0.0462185	1	Liver	eQTL
LOC110354144	29_2907525	0.997823	0.317797	1	Liver	eQTL
LOC119714231	29_2937176	0.999838	0.254273	1	Liver	eQTL
MPND	29_3083123	0.999975	0.217021	1	Liver	eQTL
TIMM13	29_3656952	0.973793	0.116667	1	Liver	eQTL
ATP8B3	29_3758411	0.995102	0.0378151	1	Liver	eQTL
SCAMP4	29_4771787	0.996254	0.211538	1	Liver	eQTL
MOB3A	29_4418021	0.948055	0.119658	2	Liver	eQTL
LOC113840680	29_5755967	0.98643	0.429134	1	Liver	eQTL
LOC119714244	31_92078	0.991119	0.0562771	1	Liver	eQTL
LOC119714247	31_91468	0.936646	0.0648536	1	Liver	eQTL
LOC119714247	31_153108	0.964892	0.0375	2	Liver	eQTL
LOC119714269	33_8442	0.991669	0.0632653	1	Liver	eQTL
MRPS12	33_19748	0.996456	0.0306122	1	Liver	eQTL
GOLGB1	1_157839	0.919842	0.427039	1	Ovary	eQTL
NME6	1_234946	0.914929	0.319742	1	Ovary	eQTL
ARSA	1_183878	0.949135	0.137131	1	Ovary	eQTL
LOC101795648	1_173228	0.999792	0.0553191	1	Ovary	eQTL
LOC101795648	1_192240	0.999642	0.248918	2	Ovary	eQTL
LOC119713273	1_776062	0.999273	0.0400844	1	Ovary	eQTL
LOC119713274	1_410618	0.984911	0.248927	1	Ovary	eQTL
MIOX	1_1619506	0.999279	0.0338983	1	Ovary	eQTL
LOC119713400	1_938091	0.952551	0.12766	1	Ovary	eQTL
SMKR1	1_1141067	0.990612	0.0366379	1	Ovary	eQTL
LOC113844150	1_1150929	0.994691	0.0560345	1	Ovary	eQTL
UBE2H	1_1224452	0.999938	0.0868644	1	Ovary	eQTL
ZC3HC1	1_1269693	0.999988	0.188841	1	Ovary	eQTL
ZC3HC1	1_1292632	0.991264	0.133475	2	Ovary	eQTL
LOC101805302	1_2191418	0.999936	0.0373444	2	Ovary	eQTL
LOC101789381	1_1350936	0.999999	0.0668104	1	Ovary	eQTL
LOC113844122	1_1418849	0.99498	0.295259	1	Ovary	eQTL
LOC113844122	1_1338846	0.999968	0.139583	2	Ovary	eQTL
LOC106015406	1_1519311	0.996664	0.201754	1	Ovary	eQTL
SLC35B4	1_1755042	0.995554	0.234783	1	Ovary	eQTL
LOC101789895	1_2677078	0.999972	0.0309917	1	Ovary	eQTL
LOC119717341	1_2071805	0.996419	0.268398	1	Ovary	eQTL
EXOC4	1_2123265	0.99435	0.125532	1	Ovary	eQTL
LOC110353845	1_3337227	0.997395	0.0444915	1	Ovary	eQTL
LOC106019031	1_3233548	0.952946	0.248918	1	Ovary	eQTL
LOC106019031	1_3277317	0.997324	0.125	2	Ovary	eQTL
LOC119715639	1_2908934	0.996745	0.125532	1	Ovary	eQTL
LOC119717836	1_3543637	0.999984	0.15272	1	Ovary	eQTL
PRKCQ	1_3835026	0.954884	0.0836735	1	Ovary	eQTL
LOC110351644	1_4102235	0.952941	0.269565	1	Ovary	eQTL
LOC101794222	1_4375851	0.952881	0.0290456	1	Ovary	eQTL
ITIH5	1_4226352	0.955565	0.378788	1	Ovary	eQTL
LOC101795885	1_4646951	0.997061	0.034413	1	Ovary	eQTL
ECHDC3	1_6222464	0.907869	0.272152	1	Ovary	eQTL
PROSER2	1_6323211	0.93795	0.451271	1	Ovary	eQTL
NUDT5	1_6436953	0.954991	0.487069	1	Ovary	eQTL
LOC119715765	1_6844624	0.999999	0.0702479	1	Ovary	eQTL
LOC119717432	1_6513137	0.984865	0.272926	1	Ovary	eQTL
LOC110352602	1_7198243	0.955098	0.0495868	1	Ovary	eQTL
LOC113843985	1_7899090	0.995033	0.041841	1	Ovary	eQTL
DCLRE1C	1_7551010	0.979707	0.0595745	1	Ovary	eQTL
MEIG1	1_7604119	0.994899	0.153017	1	Ovary	eQTL
GRM3	1_7856581	1	0.0243902	1	Ovary	eQTL
LOC113844702	1_10401618	0.964477	0.0518672	2	Ovary	eQTL
LOC106015707	1_10509562	0.980841	0.0382979	2	Ovary	eQTL
LOC119715541	1_9769997	0.98058	0.243421	1	Ovary	eQTL
LOC110353235	1_10404849	0.999999	0.0414938	1	Ovary	eQTL
LOC110353235	1_10378996	0.999766	0.0337553	2	Ovary	eQTL
LOC101805113	1_12696092	0.974968	0.14959	1	Ovary	eQTL
NAPEPLD	1_13133872	0.989985	0.262931	1	Ovary	eQTL
PSMC2	1_12903787	0.999855	0.219828	1	Ovary	eQTL
LOC119718072	1_14055824	0.999901	0.0317797	1	Ovary	eQTL
LOC119715581	1_14499796	0.952218	0.239035	1	Ovary	eQTL
LOC106018431	1_15013375	0.955735	0.335498	2	Ovary	eQTL
LAMB4	1_14359371	1	0.0226337	1	Ovary	eQTL
LOC106018336	1_16544202	1	0.0371901	1	Ovary	eQTL
LOC113843801	1_17072677	0.999147	0.403084	1	Ovary	eQTL
LOC113843801	1_16851399	0.984753	0.330508	2	Ovary	eQTL
CRELD2	1_19582601	0.919133	0.1875	1	Ovary	eQTL
LOC106017530	1_21107381	0.993804	0.111814	1	Ovary	eQTL
LOC119717445	1_21317969	0.936039	0.272727	1	Ovary	eQTL
LOC106017523	1_21288081	0.999956	0.121145	1	Ovary	eQTL
CFTR	1_26090419	0.980327	0.133621	1	Ovary	eQTL
TES	1_26601117	0.999557	0.0826271	1	Ovary	eQTL
LOC119715626	1_28495089	0.998145	0.0456432	1	Ovary	eQTL
LOC110354740	1_28528411	1	0.035124	1	Ovary	eQTL
LOC110354740	1_28474546	1	0.0962343	2	Ovary	eQTL
LSMEM1	1_28552550	0.999979	0.17735	1	Ovary	eQTL
LOC106014344	1_28608015	0.999882	0.318777	1	Ovary	eQTL
DOCK4	1_28356466	1	0.0661157	1	Ovary	eQTL
DOCK4	1_28343181	0.970824	0.105809	2	Ovary	eQTL
ZCRB1	1_31317460	1	0.0306122	1	Ovary	eQTL
ZCRB1	1_31317437	1	0.0308642	2	Ovary	eQTL
NELL2	1_32125744	0.999957	0.28913	1	Ovary	eQTL
ANO6	1_32379774	0.953213	0.385281	1	Ovary	eQTL
LOC106017383	1_32763788	0.995787	0.142857	2	Ovary	eQTL
LOC119715640	1_33952552	0.96525	0.119658	1	Ovary	eQTL
LOC106014350	1_34868451	0.952814	0.230932	1	Ovary	eQTL
LOC119715586	1_35098808	0.999821	0.447257	1	Ovary	eQTL
LOC119715586	1_34924947	0.937554	0.0557851	2	Ovary	eQTL
LOC119718731	1_36510038	0.977458	0.0523013	2	Ovary	eQTL
LOC119715545	1_35969042	1	0.0506329	1	Ovary	eQTL
LOC119715545	1_36122715	0.940819	0.197425	3	Ovary	eQTL
GRIP1	1_36607999	0.970159	0.331169	1	Ovary	eQTL
NUP107	1_37369405	0.996222	0.480519	1	Ovary	eQTL
SLC35E3	1_37438153	0.998739	0.16309	1	Ovary	eQTL
MDM2	1_37438153	0.976571	0.16309	1	Ovary	eQTL
YEATS4	1_37454567	0.93392	0.0476191	2	Ovary	eQTL
LOC110352235	1_37566260	0.999117	0.150215	1	Ovary	eQTL
LOC110352235	1_37557503	0.931335	0.174569	2	Ovary	eQTL
LOC110353571	1_38518651	0.966053	0.0416667	2	Ovary	eQTL
KCNMB4	1_37962598	0.998045	0.15	1	Ovary	eQTL
TMEM19	1_39265393	0.968838	0.0315126	1	Ovary	eQTL
TRHDE	1_39046595	0.999967	0.101695	1	Ovary	eQTL
LOC113843201	1_39497532	0.976425	0.470085	1	Ovary	eQTL
LOC101792581	1_39914758	0.915668	0.467391	1	Ovary	eQTL
LOC106020629	1_39917594	0.991142	0.226891	1	Ovary	eQTL
LOC113843352	1_40116645	0.997794	0.0946502	1	Ovary	eQTL
BBS10	1_40193485	0.933607	0.129787	1	Ovary	eQTL
BBS10	1_40395978	0.955763	0.444915	2	Ovary	eQTL
OSBPL8	1_40262033	0.929714	0.0432099	1	Ovary	eQTL
LOC110354419	1_40554712	0.992507	0.286344	1	Ovary	eQTL
LOC106019780	1_42505062	0.92484	0.320513	1	Ovary	eQTL
LOC106019780	1_42569325	0.946018	0.446121	2	Ovary	eQTL
POLR3H	1_42629724	0.999855	0.127083	1	Ovary	eQTL
CSDC2	1_42631180	0.956482	0.168122	2	Ovary	eQTL
XRCC6	1_42677415	0.999931	0.0767635	2	Ovary	eQTL
CENPM	1_42689179	0.940632	0.198718	2	Ovary	eQTL
PHETA2	1_42805038	0.99551	0.034413	1	Ovary	eQTL
TCF20	1_42873900	0.999983	0.105042	1	Ovary	eQTL
SERHL2	1_43007250	0.943483	0.419087	1	Ovary	eQTL
RRP7A	1_43030155	0.995041	0.182203	1	Ovary	eQTL
LOC119714235	1_43111902	1	0.121901	1	Ovary	eQTL
LOC113840705	1_43043717	1	0.107884	1	Ovary	eQTL
LOC119715635	1_43502975	0.999796	0.12766	1	Ovary	eQTL
LOC101793456	1_43783019	0.908226	0.0460251	2	Ovary	eQTL
LOC101799643	1_45165640	0.973774	0.103734	1	Ovary	eQTL
LOC113843028	1_43971481	0.999975	0.0504202	1	Ovary	eQTL
LOC106018638	1_45300979	0.991941	0.03125	1	Ovary	eQTL
LOC106018638	1_44947098	0.999956	0.0319149	2	Ovary	eQTL
LOC110353601	1_44006952	0.982921	0.0248963	1	Ovary	eQTL
SLC17A8	1_45768113	0.981011	0.054	1	Ovary	eQTL
LOC119717254	1_45119404	0.999897	0.0421941	1	Ovary	eQTL
LOC119717254	1_45670515	0.922397	0.0633188	2	Ovary	eQTL
LTA4H	1_46504693	0.966917	0.385776	1	Ovary	eQTL
LOC113842873	1_46666752	1	0.0965665	1	Ovary	eQTL
LOC113842873	1_46706766	0.914556	0.101215	2	Ovary	eQTL
LOC101793402	1_46846462	0.990358	0.0617284	2	Ovary	eQTL
LOC119715506	1_47406592	0.983848	0.166667	1	Ovary	eQTL
LOC119715506	1_47355483	0.982667	0.210638	2	Ovary	eQTL
CRADD	1_47615718	0.967367	0.461702	1	Ovary	eQTL
LOC119715504	1_47730552	0.968132	0.04375	1	Ovary	eQTL
LOC110351479	1_47502989	0.999951	0.0337553	1	Ovary	eQTL
LOC113842827	1_47508674	0.998374	0.0957447	1	Ovary	eQTL
LOC110351478	1_47867192	0.998939	0.0413043	1	Ovary	eQTL
LOC106014835	1_48415082	0.999953	0.0672269	1	Ovary	eQTL
POC1B	1_49153362	0.969701	0.0411523	1	Ovary	eQTL
LOC106018810	1_48411897	0.963021	0.0726496	2	Ovary	eQTL
LOC113842728	1_50975115	0.976376	0.0379747	1	Ovary	eQTL
LOC113842728	1_51487506	0.997569	0.0255319	2	Ovary	eQTL
CCDC59	1_51643908	1	0.496063	1	Ovary	eQTL
LOC101800767	1_52750269	1	0.0231092	1	Ovary	eQTL
LOC101800767	1_52757711	0.998309	0.288136	2	Ovary	eQTL
LOC101800767	1_52168255	0.999895	0.0354167	3	Ovary	eQTL
EP300	1_52734074	0.967763	0.0886076	1	Ovary	eQTL
ST13	1_52407794	0.939806	0.0364372	2	Ovary	eQTL
LOC119713000	1_52876278	0.953827	0.0446809	1	Ovary	eQTL
LOC119713000	1_52472021	0.999713	0.0458333	2	Ovary	eQTL
SGSM3	1_53196267	0.986069	0.0387755	2	Ovary	eQTL
ADSL	1_53135994	0.999745	0.354701	1	Ovary	eQTL
LOC110354455	1_53426133	0.96829	0.265217	1	Ovary	eQTL
RPS19BP1	1_53591523	0.994643	0.19697	1	Ovary	eQTL
LOC113842678	1_53650245	1	0.299578	1	Ovary	eQTL
MIEF1	1_54100594	0.937279	0.0386266	1	Ovary	eQTL
LOC113842669	1_53682869	0.992254	0.450644	1	Ovary	eQTL
MGAT3	1_53610086	0.999214	0.200422	1	Ovary	eQTL
SYNGR1	1_53671162	0.993486	0.420601	1	Ovary	eQTL
LOC113842491	1_53703146	0.984796	0.163793	1	Ovary	eQTL
DNAL4	1_53192285	0.957196	0.0481172	1	Ovary	eQTL
JOSD1	1_53868627	0.987681	0.232906	2	Ovary	eQTL
TOMM22	1_53883662	0.999998	0.383621	1	Ovary	eQTL
CBY1	1_53891810	0.990539	0.164502	1	Ovary	eQTL
DMC1	1_53682751	0.984932	0.0386266	1	Ovary	eQTL
PLA2G6	1_53999293	0.995212	0.188596	1	Ovary	eQTL
BAIAP2L2	1_54100429	0.980716	0.102128	1	Ovary	eQTL
LOC113842633	1_54100429	0.983116	0.102128	1	Ovary	eQTL
LOC113842633	1_54301016	0.999292	0.105603	2	Ovary	eQTL
C1H22orf23	1_54076289	0.984719	0.255459	1	Ovary	eQTL
LOC101804876	1_54102211	0.999997	0.229437	1	Ovary	eQTL
LOC101804876	1_53851945	0.992597	0.127119	2	Ovary	eQTL
CDC42EP1	1_54201668	1	0.422747	1	Ovary	eQTL
CDC42EP1	1_54181131	0.962297	0.425214	2	Ovary	eQTL
LOC101794299	1_53684981	0.984213	0.0609244	2	Ovary	eQTL
RASD2	1_54995268	0.912559	0.216102	1	Ovary	eQTL
HMGXB4	1_55097244	0.998252	0.248927	1	Ovary	eQTL
LOC106015667	1_55136979	0.941166	0.254273	3	Ovary	eQTL
LOC106015664	1_55615308	0.999402	0.336245	1	Ovary	eQTL
SYN3	1_56477136	0.999972	0.0387755	1	Ovary	eQTL
FBXO7	1_56200850	0.934352	0.0957447	1	Ovary	eQTL
LOC119717368	1_56609674	0.996703	0.0202429	1	Ovary	eQTL
MTERF2	1_56482880	0.992815	0.188284	1	Ovary	eQTL
LOC119716417	1_56578455	0.969609	0.361472	1	Ovary	eQTL
POLR3B	1_56763705	0.969403	0.350649	1	Ovary	eQTL
LOC119713296	1_56228610	0.999683	0.0414938	1	Ovary	eQTL
C1H12orf73	1_57698159	0.986988	0.218884	1	Ovary	eQTL
C1H12orf73	1_57690902	0.904232	0.469828	2	Ovary	eQTL
NT5DC3	1_57493531	0.979403	0.164474	1	Ovary	eQTL
LOC113843462	1_58353915	0.980332	0.0340426	1	Ovary	eQTL
MYBPC1	1_59133066	0.928953	0.0390947	1	Ovary	eQTL
TBXAS1	1_59065022	0.976436	0.0543933	1	Ovary	eQTL
LOC106017710	1_59164125	0.974978	0.0571429	1	Ovary	eQTL
AKR1D1	1_59786808	0.999999	0.118644	1	Ovary	eQTL
LOC101797066	1_59815479	0.957132	0.213693	1	Ovary	eQTL
SLC37A3	1_59931643	0.997296	0.441176	1	Ovary	eQTL
LOC101794949	1_60132422	0.999131	0.0546218	1	Ovary	eQTL
LOC119717371	1_60015394	0.998645	0.381579	1	Ovary	eQTL
ADCK2	1_60135799	0.999445	0.208511	1	Ovary	eQTL
NDUFB2	1_60100477	0.997536	0.0808511	1	Ovary	eQTL
AGK	1_60468842	0.999996	0.257511	1	Ovary	eQTL
DENND11	1_60468842	0.99995	0.257511	1	Ovary	eQTL
LOC119715679	1_60895762	0.900928	0.489177	1	Ovary	eQTL
LOC119715679	1_61424995	0.967567	0.44181	2	Ovary	eQTL
LOC101790744	1_61460637	0.998825	0.0502092	1	Ovary	eQTL
STMP1	1_61564368	0.934616	0.309211	1	Ovary	eQTL
STMP1	1_62185299	0.998879	0.492126	2	Ovary	eQTL
LOC119713920	1_61786619	0.988451	0.0375	1	Ovary	eQTL
LOC119713920	1_61724339	0.95575	0.146694	2	Ovary	eQTL
LOC119718667	1_62106540	0.999998	0.418455	1	Ovary	eQTL
OVCH1	1_63127499	1	0.432203	1	Ovary	eQTL
IQSEC3	1_63250934	0.999056	0.110656	1	Ovary	eQTL
SLC6A12	1_63460391	0.997296	0.0282258	1	Ovary	eQTL
CCDC77	1_63489876	0.999962	0.301724	1	Ovary	eQTL
LOC106018272	1_63759809	0.999359	0.305677	1	Ovary	eQTL
LOC119717289	1_64050784	1	0.0364372	1	Ovary	eQTL
FBXL14	1_63824315	0.96824	0.0352697	2	Ovary	eQTL
FBXL14	1_64268523	0.913012	0.502165	3	Ovary	eQTL
LOC113844348	1_63978137	0.998735	0.0233051	2	Ovary	eQTL
BID	1_65088090	0.993845	0.0795918	1	Ovary	eQTL
PEX26	1_65302063	0.996301	0.403433	1	Ovary	eQTL
LOC101803673	1_65180595	0.987022	0.27234	2	Ovary	eQTL
LOC113839620	1_65664939	0.997968	0.0630252	1	Ovary	eQTL
LOC119717352	1_65407875	0.999929	0.0783898	1	Ovary	eQTL
LOC101804508	1_65606903	0.978057	0.0614407	1	Ovary	eQTL
LOC106016255	1_65765948	0.999435	0.0420168	1	Ovary	eQTL
LOC119715530	1_65878252	0.999995	0.134199	1	Ovary	eQTL
LOC119715530	1_65688113	0.99395	0.0483193	2	Ovary	eQTL
LOC101803430	1_66242599	0.997356	0.234783	1	Ovary	eQTL
FAM118A	1_72314245	0.995234	0.147679	1	Ovary	eQTL
GOLT1B	1_77136879	0.956241	0.274468	1	Ovary	eQTL
STYK1	1_79217829	0.905216	0.434043	1	Ovary	eQTL
LOC119717041	1_80017164	1	0.172414	1	Ovary	eQTL
LOC119717041	1_80100134	0.994606	0.214894	2	Ovary	eQTL
LOC119717048	1_80840614	1	0.0299145	1	Ovary	eQTL
LOC119717048	1_80171319	0.931345	0.164474	2	Ovary	eQTL
LOC119717054	1_80021801	0.963204	0.155738	1	Ovary	eQTL
LOC119717040	1_80100134	0.903069	0.214894	1	Ovary	eQTL
LOC119717029	1_80017164	0.999999	0.172414	1	Ovary	eQTL
LOC119717036	1_80424485	1	0.16309	1	Ovary	eQTL
LOC119717042	1_80892372	0.989366	0.0769231	2	Ovary	eQTL
LOC119717051	1_79942344	0.978064	0.173554	1	Ovary	eQTL
LOC119717051	1_79905439	0.930212	0.131466	2	Ovary	eQTL
LOC119717021	1_80174081	0.994203	0.240175	2	Ovary	eQTL
LOC119716025	1_79977527	0.986535	0.440928	1	Ovary	eQTL
LOC113841043	1_79977013	0.988624	0.433628	1	Ovary	eQTL
LOC119717062	1_80190345	0.999995	0.469828	1	Ovary	eQTL
LOC119717062	1_79989757	0.988112	0.432203	2	Ovary	eQTL
LOC113842107	1_80190345	0.993542	0.469828	1	Ovary	eQTL
LOC113841770	1_80529220	0.997601	0.240343	2	Ovary	eQTL
ITFG2	1_80452472	0.997725	0.388655	1	Ovary	eQTL
PRMT8	1_80794775	0.997734	0.0711207	1	Ovary	eQTL
PRMT8	1_80609215	0.97881	0.318777	2	Ovary	eQTL
LOC101792988	1_80961139	0.95404	0.0357143	1	Ovary	eQTL
GSTK1	1_81640609	0.9978	0.44206	1	Ovary	eQTL
GSTK1	1_81637296	0.98825	0.0632653	2	Ovary	eQTL
CASP2	1_81773966	0.995797	0.146939	1	Ovary	eQTL
LOC113842427	1_81885336	0.989415	0.203704	1	Ovary	eQTL
RBP5	1_82021848	1	0.0304878	1	Ovary	eQTL
P3H3	1_82205584	0.971125	0.0543478	1	Ovary	eQTL
MLF2	1_82264013	0.999626	0.406383	1	Ovary	eQTL
ZNF384	1_82334467	0.999634	0.398707	1	Ovary	eQTL
NCAPD2	1_82480705	0.925889	0.0987395	1	Ovary	eQTL
MRPL51	1_82488499	0.942755	0.213362	1	Ovary	eQTL
MIX23	1_82687666	0.998469	0.102564	1	Ovary	eQTL
WARS2	1_83191588	0.971445	0.209957	1	Ovary	eQTL
LOC110353932	1_83805321	0.95391	0.0301724	1	Ovary	eQTL
LOC101792845	1_83263056	0.99618	0.0801688	1	Ovary	eQTL
TNFRSF1A	1_83896021	0.985406	0.0909091	1	Ovary	eQTL
TNFRSF1A	1_84748333	0.977424	0.288462	2	Ovary	eQTL
POLQ	1_83948902	0.928429	0.167391	1	Ovary	eQTL
RABL3	1_84365883	1	0.272926	1	Ovary	eQTL
FSTL1	1_84704375	0.985756	0.244493	2	Ovary	eQTL
LRRC58	1_84626235	0.988865	0.03125	1	Ovary	eQTL
LOC101801213	1_84673813	0.952596	0.175325	1	Ovary	eQTL
PLA1A	1_84731206	0.929094	0.218884	1	Ovary	eQTL
LOC119717648	1_84814863	0.9757	0.471983	1	Ovary	eQTL
MAB21L3	1_84899990	0.952382	0.162447	1	Ovary	eQTL
CASQ2	1_85237569	0.965687	0.0435685	1	Ovary	eQTL
LOC101792630	1_85157316	0.988466	0.185897	1	Ovary	eQTL
ARHGAP31	1_84489563	0.998381	0.0252101	2	Ovary	eQTL
LOC106016327	1_85677628	0.976975	0.0464135	1	Ovary	eQTL
LOC119717408	1_85907938	0.99999	0.0373444	1	Ovary	eQTL
LOC119717408	1_85783278	0.951148	0.13913	2	Ovary	eQTL
LOC110352874	1_86844290	0.999147	0.105603	1	Ovary	eQTL
QTRT2	1_86795842	0.947916	0.0692641	3	Ovary	eQTL
LOC119717478	1_87364500	0.955706	0.450644	2	Ovary	eQTL
LOC101798383	1_87479605	0.999998	0.0798319	1	Ovary	eQTL
LOC101798383	1_87458954	0.999086	0.0651261	2	Ovary	eQTL
CLDND1	1_87526592	0.987096	0.14557	1	Ovary	eQTL
CLDND1	1_87437817	0.992153	0.406522	3	Ovary	eQTL
CFAP44	1_86854906	0.997232	0.0599174	1	Ovary	eQTL
LOC110354487	1_87957945	0.997029	0.450644	1	Ovary	eQTL
LOC110354486	1_87072779	0.999384	0.0389344	3	Ovary	eQTL
NEPRO	1_87697601	0.952628	0.0655022	1	Ovary	eQTL
TAF13	1_88188217	0.965242	0.186957	1	Ovary	eQTL
GTPBP8	1_87763475	0.999301	0.423581	1	Ovary	eQTL
LOC101789696	1_87771666	0.951297	0.0364372	2	Ovary	eQTL
LOC119717493	1_87759930	0.981838	0.316594	1	Ovary	eQTL
SLC19A2	1_88068175	0.996712	0.213675	1	Ovary	eQTL
LOC110354432	1_88109381	0.914514	0.25641	1	Ovary	eQTL
LOC119717505	1_88165645	0.993235	0.417391	1	Ovary	eQTL
LOC106017917	1_88401264	0.999912	0.315217	1	Ovary	eQTL
SFT2D2	1_88422555	0.955812	0.467391	1	Ovary	eQTL
LOC119717521	1_88474224	0.976143	0.360169	1	Ovary	eQTL
LOC119717521	1_88507463	0.926808	0.269068	2	Ovary	eQTL
LOC110353218	1_89105199	1	0.158898	1	Ovary	eQTL
LOC110353218	1_88187189	0.981098	0.114224	2	Ovary	eQTL
LOC101792536	1_89543928	0.989042	0.0770751	1	Ovary	eQTL
LOC101792536	1_88964819	0.982145	0.117391	2	Ovary	eQTL
LOC110353973	1_89101135	0.996668	0.154867	1	Ovary	eQTL
CMSS1	1_89101117	0.996588	0.137168	1	Ovary	eQTL
CMSS1	1_89085948	0.958779	0.0800866	2	Ovary	eQTL
LOC119717544	1_89182926	0.990126	0.463362	1	Ovary	eQTL
NIT2	1_89047417	0.985894	0.193617	1	Ovary	eQTL
TMEM45A	1_88996825	0.962477	0.0970464	1	Ovary	eQTL
LOC119717547	1_89249347	0.99877	0.107438	1	Ovary	eQTL
LOC119717547	1_89584228	0.967165	0.0375494	2	Ovary	eQTL
LOC119717553	1_89572247	0.999991	0.0433071	1	Ovary	eQTL
LOC119717593	1_89144125	0.999841	0.083691	1	Ovary	eQTL
LOC119717593	1_90017392	0.969595	0.100427	2	Ovary	eQTL
LOC119717593	1_89850252	0.999537	0.104167	3	Ovary	eQTL
LOC101790632	1_89596163	0.998005	0.0354331	1	Ovary	eQTL
LOC119713259	1_91769683	0.993142	0.0649351	1	Ovary	eQTL
LOC101804931	1_92068853	0.925575	0.353448	1	Ovary	eQTL
LOC119717644	1_91984327	0.999642	0.101732	2	Ovary	eQTL
SH2D1B	1_92175236	0.995755	0.22103	1	Ovary	eQTL
GUCA1C	1_92428367	0.969695	0.0995575	2	Ovary	eQTL
LOC106018470	1_92429527	0.999962	0.446121	1	Ovary	eQTL
LOC119717702	1_92446147	0.999998	0.0333333	1	Ovary	eQTL
LOC119717702	1_92188541	1	0.0409836	2	Ovary	eQTL
LOC101800605	1_93385528	0.999867	0.214286	1	Ovary	eQTL
LOC113842374	1_93438632	1	0.0334728	1	Ovary	eQTL
LOC113842374	1_93438286	0.999371	0.0387755	2	Ovary	eQTL
LOC106016523	1_93439778	0.999013	0.0843882	2	Ovary	eQTL
LOC110352363	1_93513896	0.989938	0.220085	1	Ovary	eQTL
RIOX2	1_96049220	0.999932	0.306522	1	Ovary	eQTL
ILDR2	1_96497194	0.94281	0.438326	1	Ovary	eQTL
LOC106016437	1_96818238	0.973485	0.175966	1	Ovary	eQTL
LOC106016445	1_96849111	0.999896	0.0777311	2	Ovary	eQTL
ADPRH	1_96924288	0.997489	0.142241	1	Ovary	eQTL
ADPRH	1_97492115	0.99997	0.344156	2	Ovary	eQTL
TIMMDC1	1_97000552	0.999999	0.465517	1	Ovary	eQTL
LOC119717951	1_97103577	0.916043	0.0818965	1	Ovary	eQTL
ACP6	1_97243912	0.995613	0.112288	1	Ovary	eQTL
ACP6	1_97273222	0.968959	0.165272	2	Ovary	eQTL
GPR89B	1_97280285	0.980311	0.155983	1	Ovary	eQTL
LOC106016452	1_98019467	0.98961	0.0753138	1	Ovary	eQTL
LOC113842357	1_99377627	0.962257	0.474138	1	Ovary	eQTL
LOC106019576	1_99670694	0.981699	0.0654009	1	Ovary	eQTL
LOC106019576	1_99713287	0.993026	0.242424	2	Ovary	eQTL
LOC113841090	1_100411942	1	0.364173	1	Ovary	eQTL
LOC113840690	1_100411942	0.993308	0.364173	1	Ovary	eQTL
LOC119718151	1_100408282	0.999999	0.472441	1	Ovary	eQTL
LOC119716331	1_100411942	1	0.364173	1	Ovary	eQTL
LOC106019242	1_100512281	0.995911	0.221983	1	Ovary	eQTL
LOC106019242	1_100233375	0.98244	0.491379	2	Ovary	eQTL
LOC110353149	1_101931431	0.959641	0.0360169	1	Ovary	eQTL
LOC101792187	1_100184629	0.955612	0.0516529	1	Ovary	eQTL
LOC113842352	1_104783980	0.999967	0.433921	1	Ovary	eQTL
NCAM2	1_106004515	0.944099	0.246753	1	Ovary	eQTL
SOD1	1_110013886	0.940764	0.20614	1	Ovary	eQTL
LOC119713272	1_109954675	0.995816	0.0630252	1	Ovary	eQTL
LOC119713272	1_109930291	0.999999	0.0797414	2	Ovary	eQTL
LOC101801846	1_110261955	0.995013	0.104255	1	Ovary	eQTL
C1H21orf62	1_111124726	1	0.017316	1	Ovary	eQTL
CRYZL1	1_110727483	0.9394	0.285106	2	Ovary	eQTL
KCNE1	1_112139392	0.90957	0.0740741	1	Ovary	eQTL
CLIC6	1_110509801	0.985931	0.0180723	1	Ovary	eQTL
LOC101794661	1_111826323	0.935186	0.399563	1	Ovary	eQTL
SIM2	1_112186311	0.997465	0.0590717	1	Ovary	eQTL
VPS26C	1_112476525	0.999972	0.352814	1	Ovary	eQTL
HMGN1	1_112534871	0.988121	0.0336134	1	Ovary	eQTL
LOC113842326	1_113300840	0.976042	0.387168	2	Ovary	eQTL
SH3BGR	1_112538582	0.984787	0.190987	1	Ovary	eQTL
LOC110354389	1_116110655	0.959235	0.423913	1	Ovary	eQTL
LOC106020015	1_116164805	0.999987	0.0325203	2	Ovary	eQTL
PCYT1B	1_116197805	0.989349	0.0903361	2	Ovary	eQTL
LOC113842317	1_121096704	0.950809	0.0720524	1	Ovary	eQTL
LOC113842316	1_121085214	0.999955	0.073913	2	Ovary	eQTL
LOC119715551	1_121468007	0.995544	0.0334728	1	Ovary	eQTL
LOC119715551	1_121427298	0.998772	0.035124	2	Ovary	eQTL
TSPAN7	1_121482946	0.998354	0.0965665	1	Ovary	eQTL
LOC119714836	1_123356709	0.998315	0.129787	2	Ovary	eQTL
LOC119715671	1_124288677	0.995954	0.0241228	1	Ovary	eQTL
LOC119715671	1_124572576	0.93986	0.317982	2	Ovary	eQTL
LOC101791355	1_124663912	0.997334	0.456522	1	Ovary	eQTL
LOC101791355	1_124660831	0.999812	0.162447	2	Ovary	eQTL
SIK1	1_123834602	0.965076	0.0313807	1	Ovary	eQTL
LOC110353984	1_124694059	0.958604	0.0349794	1	Ovary	eQTL
CRYAA	1_124792245	0.980408	0.0428571	1	Ovary	eQTL
LOC106017121	1_124899746	0.997579	0.151515	1	Ovary	eQTL
LOC110352725	1_124792245	1	0.0428571	1	Ovary	eQTL
LOC101797717	1_124960276	0.905805	0.205508	1	Ovary	eQTL
LOC101797717	1_124927339	0.941322	0.182008	2	Ovary	eQTL
LOC110352721	1_124781746	0.99811	0.0317797	1	Ovary	eQTL
LOC101799709	1_125341063	0.992518	0.053719	1	Ovary	eQTL
UMODL1	1_125313850	0.998865	0.101266	2	Ovary	eQTL
MAP7D2	1_126203725	0.999987	0.0254237	1	Ovary	eQTL
PPEF1	1_126679763	0.982513	0.139583	1	Ovary	eQTL
LOC113841432	1_127020768	0.997584	0.347458	1	Ovary	eQTL
LOC113841310	1_127583515	0.987248	0.0958333	2	Ovary	eQTL
LOC110351753	1_127843882	0.995825	0.379828	1	Ovary	eQTL
PIGA	1_128159565	0.981182	0.140496	1	Ovary	eQTL
LOC110351892	1_127626635	0.927166	0.0668104	1	Ovary	eQTL
GLRA2	1_128680973	0.993789	0.140693	1	Ovary	eQTL
LOC110351891	1_128734970	0.951665	0.231092	1	Ovary	eQTL
GEMIN8	1_128951828	1	0.353191	1	Ovary	eQTL
LOC101804074	1_129048171	0.999996	0.0460251	1	Ovary	eQTL
LOC119715590	1_131801079	0.997868	0.0666667	1	Ovary	eQTL
WWC3	1_130163663	0.950219	0.229258	1	Ovary	eQTL
GPR143	1_131013261	0.996154	0.113043	1	Ovary	eQTL
LOC119715546	1_134875675	0.99994	0.392704	1	Ovary	eQTL
XG	1_134900716	0.964586	0.357759	1	Ovary	eQTL
LOC106019302	1_136269581	1	0.0662393	1	Ovary	eQTL
LOC106019302	1_134620542	0.999821	0.0401606	2	Ovary	eQTL
LOC110353993	1_135483389	0.911667	0.293103	1	Ovary	eQTL
ASMTL	1_135796663	0.96343	0.339056	1	Ovary	eQTL
LOC119715550	1_135943033	0.994071	0.0485232	1	Ovary	eQTL
LOC119715550	1_135918920	0.999998	0.061674	2	Ovary	eQTL
LOC101794111	1_136024249	0.994788	0.0444915	1	Ovary	eQTL
PLCXD1	1_136858184	0.989301	0.293478	1	Ovary	eQTL
LOC106017632	1_136819790	0.955557	0.228632	1	Ovary	eQTL
LOC106017632	1_137011851	0.920314	0.0543933	2	Ovary	eQTL
LOC106017632	1_137126440	0.985793	0.445415	3	Ovary	eQTL
LOC113840218	1_138258658	0.930002	0.083682	1	Ovary	eQTL
LOC119713329	1_138456899	0.998938	0.391026	1	Ovary	eQTL
LOC106018721	1_138142785	0.999727	0.146552	1	Ovary	eQTL
LOC110354365	1_138522932	0.998927	0.0892116	1	Ovary	eQTL
TSGA10	1_139398778	0.942742	0.283262	1	Ovary	eQTL
MRPL30	1_139320240	0.930317	0.355603	1	Ovary	eQTL
LOC119713011	1_139668111	0.999851	0.042735	1	Ovary	eQTL
LOC101797824	1_140793254	0.97819	0.0286885	1	Ovary	eQTL
LOC110351630	1_140285457	0.99298	0.132035	1	Ovary	eQTL
SLC9A4	1_141174390	0.961617	0.0454545	1	Ovary	eQTL
FHL2	1_142121802	0.999852	0.0645833	1	Ovary	eQTL
LOC113839965	1_143192153	0.999462	0.0443038	1	Ovary	eQTL
LOC119715588	1_142570918	0.997189	0.331224	1	Ovary	eQTL
ECRG4	1_142569918	0.999924	0.0995763	1	Ovary	eQTL
LOC101798236	1_142683158	0.977833	0.113734	1	Ovary	eQTL
LOC101798236	1_143192687	0.999197	0.0508475	2	Ovary	eQTL
LOC110351483	1_143005192	0.997942	0.0300429	1	Ovary	eQTL
TMEM255B	1_144190533	0.999535	0.0336134	1	Ovary	eQTL
TMCO3	1_144297378	0.984167	0.219409	1	Ovary	eQTL
LOC119716522	1_144444576	0.999401	0.033195	1	Ovary	eQTL
LOC110353127	1_145032021	0.99446	0.0337553	1	Ovary	eQTL
NAXD	1_146154976	0.996048	0.126068	1	Ovary	eQTL
ING1	1_146389598	0.952167	0.373932	1	Ovary	eQTL
LIG4	1_147014563	0.999922	0.1	2	Ovary	eQTL
LIG4	1_147447153	0.993134	0.0349794	3	Ovary	eQTL
FAM155A	1_147019616	0.997302	0.0682819	2	Ovary	eQTL
LOC113839801	1_147093552	0.956131	0.0884774	1	Ovary	eQTL
BIVM	1_150190622	0.988949	0.338298	1	Ovary	eQTL
TM9SF2	1_151826851	0.99712	0.243478	1	Ovary	eQTL
TM9SF2	1_151799156	0.990098	0.138889	2	Ovary	eQTL
IPO5	1_152478012	0.987886	0.334043	1	Ovary	eQTL
LOC110354142	1_152800338	1	0.0357143	1	Ovary	eQTL
LOC110354142	1_152800687	1	0.0320513	2	Ovary	eQTL
LOC101802399	1_151848908	0.999927	0.0338983	1	Ovary	eQTL
UGGT2	1_153184706	0.957061	0.459227	1	Ovary	eQTL
LOC113839700	1_155325594	0.992444	0.186957	2	Ovary	eQTL
SLAIN1	1_162187975	0.904234	0.135193	1	Ovary	eQTL
LOC119717627	1_162869408	0.925012	0.0798319	1	Ovary	eQTL
FBXL3	1_162776014	0.96013	0.292208	1	Ovary	eQTL
KCTD12	1_163778549	0.999926	0.0550661	1	Ovary	eQTL
COMMD6	1_163308671	0.917522	0.304348	1	Ovary	eQTL
BORA	1_164654070	0.968497	0.454348	1	Ovary	eQTL
LOC110351585	1_171281391	0.99022	0.380952	2	Ovary	eQTL
LOC119715508	1_174489166	0.962922	0.134043	1	Ovary	eQTL
MTRF1	1_175153110	1	0.105042	1	Ovary	eQTL
MTRF1	1_175933887	0.975516	0.0524017	3	Ovary	eQTL
EPSTI1	1_176776333	0.994024	0.0662393	1	Ovary	eQTL
LACC1	1_176443236	0.990891	0.290254	1	Ovary	eQTL
LACC1	1_175938036	0.990647	0.182018	2	Ovary	eQTL
LOC119715568	1_176583304	0.944684	0.191358	1	Ovary	eQTL
GPALPP1	1_176904412	0.996949	0.484848	1	Ovary	eQTL
LOC101800907	1_176920227	0.99999	0.297826	1	Ovary	eQTL
LOC101800907	1_176972239	0.998667	0.214592	2	Ovary	eQTL
LOC119715617	1_176952985	1	0.0608696	1	Ovary	eQTL
LOC119715617	1_176619022	0.994001	0.0643777	2	Ovary	eQTL
LOC119715623	1_176875885	0.999317	0.133475	1	Ovary	eQTL
LOC119715677	1_176985258	0.926891	0.193133	1	Ovary	eQTL
LOC119715620	1_176983462	0.903619	0.10084	1	Ovary	eQTL
LOC113842475	1_177256996	0.955204	0.113248	2	Ovary	eQTL
LOC101792784	1_177218461	0.999985	0.423077	1	Ovary	eQTL
LOC101792784	1_177189585	0.999689	0.478261	2	Ovary	eQTL
LOC101792067	1_177189585	0.995521	0.478261	1	Ovary	eQTL
LOC119715627	1_177186812	0.997401	0.387446	1	Ovary	eQTL
LOC119715627	1_177189585	0.986593	0.478261	2	Ovary	eQTL
LRRC63	1_177378171	0.997578	0.0311203	1	Ovary	eQTL
SUCLA2	1_177981334	0.94624	0.0625	1	Ovary	eQTL
LOC113845548	1_178398885	0.908453	0.172414	1	Ovary	eQTL
LOC106018642	1_179853608	0.942243	0.0732218	1	Ovary	eQTL
DHRS12	1_179462756	0.993116	0.305907	2	Ovary	eQTL
ALG11	1_179610192	0.979626	0.35	1	Ovary	eQTL
NEK5	1_180598867	0.965421	0.0313808	2	Ovary	eQTL
NEK3	1_179669792	0.999993	0.117155	1	Ovary	eQTL
NEK3	1_179687335	0.978059	0.447368	2	Ovary	eQTL
LHFPL6	1_181104725	0.97151	0.0280172	1	Ovary	eQTL
LOC113845454	1_181099548	0.997502	0.0266393	1	Ovary	eQTL
LOC113845450	1_180960356	0.992214	0.0826087	2	Ovary	eQTL
LOC101798073	1_180576710	0.990527	0.378788	1	Ovary	eQTL
LOC106016737	1_181647556	0.963699	0.0847108	2	Ovary	eQTL
EXOSC8	1_181579702	0.979852	0.430435	1	Ovary	eQTL
EXOSC8	1_182168387	0.90075	0.0446809	2	Ovary	eQTL
SERTM1	1_182025738	0.933248	0.0315126	1	Ovary	eQTL
LOC110351687	1_182916191	0.996732	0.105372	1	Ovary	eQTL
LOC113845351	1_183759539	0.919768	0.174569	1	Ovary	eQTL
N4BP2L2	1_183791452	0.999999	0.0840336	1	Ovary	eQTL
RXFP2	1_184361857	0.999981	0.033195	2	Ovary	eQTL
LOC113841038	1_184610213	0.999697	0.0711297	1	Ovary	eQTL
LOC113841038	1_184237905	0.966578	0.0326087	2	Ovary	eQTL
LOC101797163	1_184648425	1	0.27897	1	Ovary	eQTL
LOC113845335	1_184650516	0.994293	0.300866	1	Ovary	eQTL
LOC106016662	1_183883133	0.969819	0.0942982	1	Ovary	eQTL
RPL21	1_185845192	0.952653	0.442308	1	Ovary	eQTL
LOC119714734	1_185900976	0.989679	0.354626	1	Ovary	eQTL
NUP58	1_186589335	0.956931	0.373391	1	Ovary	eQTL
LOC119712989	1_188194116	0.981911	0.280632	1	Ovary	eQTL
EEF1AKMT1	1_188439793	0.951061	0.245763	1	Ovary	eQTL
IFT88	1_188816218	0.960601	0.237288	1	Ovary	eQTL
LOC119716068	1_188615554	0.999981	0.0899582	1	Ovary	eQTL
C1H11orf87	1_189487480	0.994814	0.0317797	1	Ovary	eQTL
LOC119716159	1_190117099	0.999672	0.424569	1	Ovary	eQTL
LOC119716173	1_190466781	0.96074	0.0612245	2	Ovary	eQTL
EXPH5	1_189047918	0.988846	0.13617	1	Ovary	eQTL
LOC110353868	1_189920524	1	0.118143	1	Ovary	eQTL
ACAT1	1_190307605	0.954016	0.476496	1	Ovary	eQTL
GRIA4	1_191190951	0.963021	0.0464135	2	Ovary	eQTL
PDGFD	1_191690643	0.90424	0.230603	1	Ovary	eQTL
LOC106019269	1_192707583	0.988247	0.0550847	2	Ovary	eQTL
LOC119716358	1_193193490	0.999997	0.0257511	1	Ovary	eQTL
CNTN5	1_194948185	0.988546	0.0965665	1	Ovary	eQTL
MTMR2	1_195520456	0.969452	0.0684647	1	Ovary	eQTL
LOC119716386	1_195686559	0.954762	0.243478	1	Ovary	eQTL
ENDOD1	1_195789957	0.999143	0.4	1	Ovary	eQTL
MED17	1_196142392	0.999667	0.278017	1	Ovary	eQTL
C1H11orf54	1_196193330	0.996672	0.221992	1	Ovary	eQTL
LOC113841424	1_197770930	0.999771	0.0381356	1	Ovary	eQTL
LOC113841424	1_197818182	0.9814	0.202532	2	Ovary	eQTL
LOC110354162	1_199318139	0.972716	0.17161	1	Ovary	eQTL
ME3	1_200305437	0.968423	0.0366379	1	Ovary	eQTL
LOC113841416	1_199676487	0.964307	0.122881	1	Ovary	eQTL
LOC119716490	1_199457910	0.995538	0.156	1	Ovary	eQTL
LOC119716493	1_199367725	0.993816	0.119048	1	Ovary	eQTL
LOC119716545	1_200900726	0.9886	0.10515	1	Ovary	eQTL
FAM181B	1_200920587	0.928404	0.0847458	1	Ovary	eQTL
DDIAS	1_200966476	0.999513	0.0932203	1	Ovary	eQTL
LOC119716586	1_201034764	0.984632	0.418803	1	Ovary	eQTL
CCDC89	1_200967362	0.920488	0.0555556	1	Ovary	eQTL
HIKESHI	1_202192688	0.995358	0.0349345	1	Ovary	eQTL
LOC106018545	1_203139768	0.970085	0.114719	2	Ovary	eQTL
NARS2	1_203665077	0.918652	0.16318	1	Ovary	eQTL
NARS2	1_203694237	0.935828	0.218615	2	Ovary	eQTL
LOC119716660	1_203477151	0.999977	0.232759	1	Ovary	eQTL
LOC119716660	1_203769395	0.998813	0.0974576	2	Ovary	eQTL
ALG8	1_203787080	0.990494	0.30531	1	Ovary	eQTL
AAMDC	1_203887499	0.987549	0.0840517	1	Ovary	eQTL
CLNS1A	1_203946356	0.998069	0.211864	1	Ovary	eQTL
PAK1	1_203957940	0.926697	0.233906	1	Ovary	eQTL
GDPD4	1_204052123	0.999347	0.139583	1	Ovary	eQTL
LOC101796699	1_204223370	0.99539	0.324894	1	Ovary	eQTL
ACER3	1_204223370	0.976881	0.324894	1	Ovary	eQTL
ACER3	1_204248791	0.960164	0.330472	3	Ovary	eQTL
LOC119716734	1_204521165	0.970417	0.0772532	1	Ovary	eQTL
LOC119716734	1_203917240	0.99284	0.0394191	2	Ovary	eQTL
LOC119716750	1_204710828	0.993015	0.214286	1	Ovary	eQTL
LOC113842467	1_205405553	0.999197	0.173913	1	Ovary	eQTL
LOC113842467	1_205313604	0.989735	0.0775862	2	Ovary	eQTL
FAM168A	1_205740678	0.912585	0.0572687	1	Ovary	eQTL
LOC113844224	1_205817372	0.994861	0.247845	1	Ovary	eQTL
DNAJB13	1_205848951	0.997108	0.272727	1	Ovary	eQTL
LOC101794508	1_205878809	0.942467	0.034	1	Ovary	eQTL
PPME1	1_205903489	0.999988	0.305085	1	Ovary	eQTL
XRRA1	1_205925285	1	0.0614407	1	Ovary	eQTL
RNF169	1_205045876	0.999676	0.0379747	1	Ovary	eQTL
LOC113844827	1_205394505	0.96189	0.0468085	2	Ovary	eQTL
LOC119716887	1_205312495	0.923584	0.0680851	2	Ovary	eQTL
LOC113844749	1_206298536	0.999966	0.117769	1	Ovary	eQTL
LOC119716831	1_206242743	0.99525	0.052521	1	Ovary	eQTL
LOC119716850	1_206298485	0.997927	0.413793	1	Ovary	eQTL
LOC119716862	1_206300353	0.999941	0.474026	1	Ovary	eQTL
LOC119716862	1_206244830	0.999884	0.14916	2	Ovary	eQTL
LOC119716856	1_206470687	0.999976	0.0373444	1	Ovary	eQTL
LOC119713069	1_206500677	0.999754	0.0411523	1	Ovary	eQTL
LOC119716872	1_206246161	0.996879	0.0489796	2	Ovary	eQTL
LOC101801715	1_206964825	0.955641	0.311688	1	Ovary	eQTL
LOC113844789	1_206885830	0.999989	0.0555556	1	Ovary	eQTL
LOC113844789	1_206932640	0.999946	0.0325203	2	Ovary	eQTL
CCKBR	1_206956097	0.998787	0.284483	1	Ovary	eQTL
TIMM10B	1_207057744	0.969673	0.168776	1	Ovary	eQTL
ILK	1_207068810	0.969951	0.0843882	1	Ovary	eQTL
SCX	2_641269	0.981172	0.0458333	1	Ovary	eQTL
SHARPIN	2_103988	0.999507	0.144681	1	Ovary	eQTL
LOC101791612	2_235001	0.98052	0.111814	1	Ovary	eQTL
LOC119716072	2_1980718	1	0.034632	1	Ovary	eQTL
LOC119716072	2_1116298	0.999954	0.04329	2	Ovary	eQTL
LOC101791980	2_1312082	0.999768	0.132479	1	Ovary	eQTL
LOC106015895	2_694886	0.959525	0.0444915	2	Ovary	eQTL
LOC110352065	2_1810538	0.999582	0.083682	1	Ovary	eQTL
LOC110352063	2_1627696	0.983121	0.0840517	1	Ovary	eQTL
LOC106015896	2_1702302	0.985151	0.27897	1	Ovary	eQTL
LOC106015896	2_1668491	0.941999	0.127119	2	Ovary	eQTL
LOC110354679	2_1473306	0.996655	0.0280172	1	Ovary	eQTL
PTP4A3	2_3620523	0.973628	0.284483	1	Ovary	eQTL
PTK2	2_3995833	0.983001	0.348018	1	Ovary	eQTL
CHRAC1	2_4088819	0.999993	0.469697	1	Ovary	eQTL
LOC110352462	2_5745898	0.999854	0.100858	1	Ovary	eQTL
FAM135B	2_4948422	0.948332	0.0481171	1	Ovary	eQTL
LOC119716097	2_8020626	0.999679	0.143478	2	Ovary	eQTL
TG	2_10179889	0.997226	0.0983264	1	Ovary	eQTL
TMEM71	2_10317224	0.992656	0.0819328	1	Ovary	eQTL
OC90	2_10501806	1	0.0696721	1	Ovary	eQTL
LOC119716162	2_10323516	0.999822	0.0311203	1	Ovary	eQTL
LOC106019391	2_10430603	0.987576	0.0323276	1	Ovary	eQTL
[truncated: 19,811 more rows]
