# Supplementary material for: Mapping multitissue regulatory variants reveals a liver-centric coexpression network associated with duck egg-laying performance
Source: HighWire-hosted journal article supplement (doi:10.1101/gr.280345.124), 2025-09-10
Supplement: Supplemental_Table_S7.xlsx [file Supplemental_Table_S7.xlsx]

## Sheet: Sheet1
Supplemental Table S7. The independent GWAS loci identified by LD clumping.
CHR	F	SNP	BP	P	AnnotatedGene	TOTAL	NSIG	S05	S01	S001	S0001	SP2	GWAS
10	1	10_6165096	6165096	3.8e-13	LOC101791703	1698	981	290	214	111	102	10_5568208(1),10_5580176(1),10_6169590(1),10_6169596(1),10_6193339(1)	Egg_production_W2
8	1	8_3486804	3486804	9.14e-11	/	2604	2060	315	145	56	28	NONE	Egg_production_W2
15	1	15_16324139	16324139	9.71e-11	SLC9A3R2	2049	1594	249	145	41	20	NONE	Egg_production_W2
8	1	8_9662517	9662517	4.46e-10	ITPA,VAMP4	1415	1122	196	73	20	4	NONE	Egg_production_W2
10	1	10_1026149	1026149	7.75e-10	LOC119717956	1127	516	215	192	107	97	10_1103553(1),10_1524214(1),10_1790540(1)	Egg_production_W2
25	1	25_366067	366067	9.89e-10	PKNOX2	559	495	28	20	10	6	NONE	Egg_production_W2
2	1	2_47027633	47027633	1.11e-09	GAREM1	943	681	132	72	36	22	2_46998763(1)	Egg_production_W2
8	1	8_8470129	8470129	1.23e-09	RGS1	1879	1476	212	110	40	41	NONE	Egg_production_W2
3	1	3_82878193	82878193	1.4e-09	LOC101795819	2069	1574	228	173	54	40	NONE	Egg_production_W2
5	1	5_37405951	37405951	1.56e-09	SMOC1	3736	3250	322	131	26	7	NONE	Egg_production_W2
18	1	18_9374533	9374533	2.01e-09	UBAC1	2580	2204	178	117	51	30	NONE	Egg_production_W2
7	1	7_13201698	13201698	2.05e-09	TMEM177	1090	767	127	125	52	19	NONE	Egg_production_W7
13	1	13_15313842	15313842	1.77e-10	LOC119718280	4758	3339	638	471	192	118	13_15242009(1)	Egg_production_W8
7	1	7_10955217	10955217	1.79e-09	/	2385	1575	387	267	108	48	NONE	Egg_production_W8
4	1	4_18001570	18001570	4.63e-10	ASAH1	2914	2302	342	159	66	45	NONE	Egg_production_W9
4	1	4_11114339	11114339	1.16e-09	CCSER1	4009	3179	493	240	66	31	4_11358791(1)	Egg_production_W9
3	1	3_28958729	28958729	1.99e-09	/	3912	3288	390	188	33	13	NONE	Egg_production_W9
4	1	4_43762564	43762564	2.37e-10	/	2623	2179	280	114	32	18	NONE	Egg_production_W10
4	1	4_11358791	11358791	3.16e-10	SNCA	3195	2484	389	222	72	28	4_11114339(1),4_11665789(1)	Egg_production_W10
1	1	1_186011002	186011002	3.88e-10	GPR12	3732	2844	493	276	89	30	1_186010996(1)	Egg_production_W10
22	1	22_3205808	3205808	4.23e-10	LOC106016420	2250	2083	128	28	6	5	NONE	Egg_production_W10
3	1	3_28958729	28958729	4.34e-10	/	3912	3269	414	170	45	14	NONE	Egg_production_W10
9	1	9_8663615	8663615	9.43e-10	ATP11B	1115	892	110	71	29	13	NONE	Egg_production_W10
1	1	1_85745130	85745130	1.48e-09	/	1373	1103	140	90	24	16	NONE	Egg_production_W10
1	1	1_85745130	85745130	8.08e-13	/	1373	957	204	121	63	28	1_85748166(1)	Egg_production_W11
3	1	3_28546062	28546062	5.28e-11	SDCCAG8	3094	2300	424	269	69	32	3_28958729(1)	Egg_production_W11
3	1	3_34607490	34607490	1.23e-10	DNAH8	2669	1793	425	286	105	60	3_35208376(1)	Egg_production_W11
4	1	4_43762564	43762564	1.89e-10	/	2623	2337	176	81	21	8	NONE	Egg_production_W11
4	1	4_11114339	11114339	7.6e-10	CCSER1	4009	3334	369	206	69	31	NONE	Egg_production_W11
5	1	5_55878251	55878251	1.71e-09	/	2225	1564	324	201	77	59	5_54912526(1),5_55883589(1),5_55883598(1)	Egg_production_W11
3	1	3_119325256	119325256	2.32e-09	/	1832	1474	202	108	34	14	NONE	Egg_production_W11
11	1	11_16047309	16047309	2.36e-09	ST8SIA2	2357	2116	137	62	27	15	NONE	Egg_production_W11
5	1	5_55883589	55883589	4.59e-11	/	2587	2081	273	149	48	36	5_55883598(1)	Egg_production_W12
3	1	3_28958729	28958729	5.14e-11	/	3912	3037	524	248	72	31	NONE	Egg_production_W12
11	1	11_16047309	16047309	9.76e-10	ST8SIA2	2357	2028	170	100	40	19	NONE	Egg_production_W12
4	1	4_17454603	17454603	1.1e-09	MICU3	1478	1076	228	106	50	18	NONE	Egg_production_W12
1	1	1_85745130	85745130	1.23e-09	/	1373	1036	185	92	39	21	NONE	Egg_production_W12
8	1	8_10703334	10703334	1.33e-09	LOC119717600,ZNF648	1055	806	141	72	21	15	NONE	Egg_production_W12
6	1	6_37630331	37630331	1.73e-09	INPP5A	1345	1027	164	110	30	14	NONE	Egg_production_W12
1	1	1_84358146	84358146	2.14e-09	GTF2E1,RABL3	4482	3712	450	202	84	34	NONE	Egg_production_W12
3	1	3_68989777	68989777	2.51e-09	/	1863	1422	247	129	47	18	NONE	Egg_production_W12
3	1	3_28958729	28958729	3.99e-13	/	3912	3027	509	270	76	30	NONE	Egg_production_W13
1	1	1_85745130	85745130	6.94e-11	/	1373	1106	148	82	23	14	NONE	Egg_production_W13
5	1	5_55883589	55883589	1.55e-10	/	2587	1919	339	192	81	56	5_54887822(1),5_55883598(1)	Egg_production_W13
3	1	3_14117445	14117445	1.98e-10	/	3965	3360	381	159	47	18	NONE	Egg_production_W13
14	1	14_2199888	2199888	2.16e-10	RAPGEF6	4343	3824	356	131	22	10	NONE	Egg_production_W13
18	1	18_9215846	9215846	5.65e-10	QSOX2	2459	1852	313	196	65	33	NONE	Egg_production_W13
10	1	10_15527635	15527635	7.97e-10	FGF13	2664	2359	184	94	15	12	NONE	Egg_production_W13
1	1	1_59939381	59939381	1.61e-09	SLC37A3	1601	1323	146	89	29	14	1_59934202(1)	Egg_production_W13
1	1	1_84358146	84358146	1.89e-09	GTF2E1,RABL3	4482	3991	310	142	28	11	NONE	Egg_production_W13
2	1	2_214162	214162	1.77e-11	PLEC	1011	498	238	180	58	37	NONE	Egg_production_W14
7	1	7_37434728	37434728	5.05e-11	SLC39A10	2627	1913	381	230	71	32	NONE	Egg_production_W14
5	1	5_55883589	55883589	1.25e-10	/	2587	1990	322	185	57	33	5_55883598(1)	Egg_production_W14
1	1	1_85745130	85745130	4.29e-10	/	1373	1156	133	50	25	9	NONE	Egg_production_W14
3	1	3_28958729	28958729	7.16e-10	/	3912	3164	472	209	56	11	NONE	Egg_production_W14
1	1	1_85745130	85745130	5.89e-11	/	1373	1164	115	69	18	7	NONE	Egg_production_W15
4	1	4_27616216	27616216	1.57e-10	SMIM31	1507	1023	210	170	75	29	NONE	Egg_production_W15
5	1	5_54647138	54647138	2.42e-10	TNKS1BP1	1373	1116	158	70	18	11	NONE	Egg_production_W15
1	1	1_35522395	35522395	5.47e-10	SRGAP1	2916	2789	96	27	4	0	NONE	Egg_production_W15
3	1	3_8121466	8121466	1.32e-09	/	1674	1119	149	160	120	126	3_8022954(1),3_8051001(1),3_8227860(1)	Egg_production_W15
8	1	8_24522029	24522029	2.54e-09	BEND5	1886	1354	300	170	43	19	NONE	Egg_production_W15
4	1	4_27616216	27616216	2.04e-11	SMIM31	1507	1022	213	141	80	51	4_27574859(1),4_27616201(1),4_27675079(1)	Egg_production_W16
1	1	1_139973888	139973888	2.06e-11	LOC106015111	1798	1460	186	113	26	13	1_139891401(1)	Egg_production_W16
1	1	1_35522395	35522395	2.09e-10	SRGAP1	2916	2703	141	58	11	3	NONE	Egg_production_W16
4	1	4_22114656	22114656	2.17e-10	TENM3	1884	1466	230	138	34	16	NONE	Egg_production_W16
21	1	21_15933356	15933356	4.68e-10	DUSP15	2750	2300	290	121	30	9	NONE	Egg_production_W16
3	1	3_8022954	8022954	9.91e-10	MACROD2	1126	708	116	143	80	79	NONE	Egg_production_W16
1	1	1_85745130	85745130	1.42e-09	/	1373	1127	155	61	27	3	NONE	Egg_production_W16
1	1	1_139973888	139973888	2.24e-09	LOC106015111	1798	1522	161	84	23	8	NONE	Egg_production_W17
19	1	19_12482246	12482246	2.36e-09	LOC106020524	1110	402	204	285	124	95	19_11717171(1)	Egg_production_W17
4	1	4_17172427	17172427	3.46e-10	/	1806	1163	272	204	102	65	4_17172458(1)	Egg_production_W18
4	1	4_19964748	19964748	1.1e-09	SNX25	2938	2071	408	262	104	93	NONE	Egg_production_W18
4	1	4_22114656	22114656	1.83e-09	TENM3	1884	1290	319	179	62	34	NONE	Egg_production_W18
4	1	4_27616216	27616216	1.9e-09	SMIM31	1507	1129	182	104	43	49	NONE	Egg_production_W18
8	1	8_26547354	26547354	2.06e-09	/	2758	2224	308	177	35	14	NONE	Egg_production_W18
1	1	1_204519292	204519292	5.21e-10	/	1978	1546	223	131	47	31	NONE	Egg_production_W19
2	1	2_23399042	23399042	7.99e-10	GRHL2	3250	2661	361	170	42	16	NONE	Egg_production_W19
8	1	8_22446164	22446164	8.61e-10	LOC101793567,AKR1A1	4799	3800	574	302	87	36	8_22175656(1),8_22175686(1)	Egg_production_W19
2	1	2_16766917	16766917	1.08e-09	LOC119715930,EIF3H	3334	3145	124	41	17	7	NONE	Egg_production_W19
3	1	3_116976794	116976794	2.36e-09	RP1L1	1512	1140	187	101	62	22	NONE	Egg_production_W19
6	1	6_26003695	26003695	2.01e-09	/	2136	1601	304	161	45	25	NONE	Egg_production_W21
19	1	19_12839472	12839472	4.28e-10	GAS7	628	116	94	141	114	163	19_12162159(1),19_12232120(1),19_12482246(1),19_12599853(1),19_12782832(1),19_12782833(1)	Egg_production_W22
19	1	19_11463219	11463219	2.45e-09	SHISA6	1587	542	306	342	215	182	19_12232120(1)	Egg_production_W23
2	1	2_38653529	38653529	7.48e-10	MTFR1,ARMC1	1512	1448	44	18	2	0	NONE	Egg_production_W24
19	1	19_12232120	12232120	8.94e-10	LOC101790131,TMEM220,ADPRM	1300	302	186	320	259	233	19_11463219(1),19_11524241(1),19_12194222(1),19_12853378(1)	Egg_production_W24
19	1	19_12194222	12194222	1.94e-10	MAP2K4	1278	357	237	319	199	166	NONE	Egg_production_W25
5	1	5_59704851	59704851	5.5e-10	ELP4	2594	2190	267	115	20	2	NONE	Egg_production_W25
19	1	19_12194222	12194222	1.01e-12	MAP2K4	1278	220	194	272	253	339	19_11204115(1),19_11463219(1),19_11780520(1),19_11806968(1),19_11834218(1),19_12482246(1),19_12839472(1)	Egg_production_W26
19	1	19_12194222	12194222	4.84e-12	MAP2K4	1278	340	222	286	226	204	19_11204115(1),19_12292104(1),19_12839472(1),19_12853378(1)	Egg_production_W27
19	1	19_12194222	12194222	1.52e-11	/	1278	384	219	302	204	169	19_11463219(1),19_12139804(1)	Egg_production_W28
3	1	3_17552802	17552802	1.64e-09	MAP2K4	4078	2063	789	680	328	218	3_16752316(1),3_17552801(1)	Egg_production_W28
19	1	19_11463219	11463219	1.31e-09	SHISA6	1587	621	296	369	193	108	19_12194222(1)	Egg_production_W29
4	1	4_45314162	45314162	1.82e-16	ABCG2	5242	2700	889	718	375	560	4_44410843(1),4_44968211(1),4_45296403(1),4_45296530(1),4_45296681(1),4_45296862(1),4_45297306(1),4_45297310(1),4_45297323(1),4_45297324(1),4_45297593(1),4_45300009(1),4_45300254(1),4_45300378(1),4_45301106(1),4_45301113(1),4_45301114(1),4_45301221(1),4_45301324(1),4_45301337(1),4_45301371(1),4_45301375(1),4_45302323(1),4_45302328(1),4_45302330(1),4_45306800(1),4_45310178(1),4_45310186(1),4_45312…	EggShell_reflectance
4	1	4_43080942	43080942	5.28e-14	ADAD1	3749	1274	548	684	569	674	4_42129225(1),4_42129236(1),4_42176734(1),4_42264450(1),4_42305437(1),4_42829548(1),4_42837985(1),4_42837990(1),4_42958021(1),4_42964124(1),4_42979131(1),4_42983672(1),4_42992061(1),4_42992271(1),4_42992276(1),4_42992288(1),4_42992578(1),4_42992580(1),4_42995965(1),4_43007907(1),4_43027177(1),4_43027224(1),4_43042504(1),4_43051953(1),4_43082359(1),4_43119283(1),4_43129274(1),4_43137524(1),4_43145…	EggShell_reflectance
4	1	4_72280450	72280450	6.11e-10	CTNNA2	3931	2327	575	532	266	231	4_71674227(1),4_71689679(1),4_71689690(1),4_72280455(1),4_72280507(1)	EggShell_reflectance
4	1	4_56759685	56759685	7.82e-10	/	1612	850	288	235	136	103	4_56579010(1),4_56614624(1)	EggShell_reflectance
