# Supplementary material for: Mapping multitissue regulatory variants reveals a liver-centric coexpression network associated with duck egg-laying performance
Source: HighWire-hosted journal article supplement (doi:10.1101/gr.280345.124), 2025-09-10
Supplement: Supplemental_Table_S8.xlsx [file Supplemental_Table_S8.xlsx]

## Sheet: Sheet1
Supplemental Table S8. The summary of significant co-localization signals (PP4 > 0.4) between molQTL and GWAS.
nsnps	Phenotype	Gene	PP4	Tissue	QTL_Type	GWAS	Shared_Causal_SNP	SNP_PP_H4
7727	COQ2	COQ2	0.562079	liver	eQTL	Egg_Production_W10	4_44390424	0.99065
5383	XM_027453326.2|ESF1|chr3|+	ESF1	0.823043	liver	apaQTL	Egg_Production_W16	3_8099052	0.83172
9032	MSH2	MSH2	0.436395	liver	eQTL	Egg_Production_W28	3_17472979	0.96846
5747	LOC110353100	LOC110353100	0.807089	ovary	eQTL	Egg_Production_W2	3_83730307	0.99419
8255	UBE3D	UBE3D	0.432486	ovary	eQTL	Egg_Production_W2	3_82902910	0.8967
4655	LOC110353173	LOC110353173	0.726018	ovary	eQTL	Egg_Production_W2	10_1058602	0.98083
785	chr10:3719263:3719661:clu_8557_+	TMEM164	0.850793	ovary	sQTL	Egg_Production_W2	10_4585629	0.9408
5383	NDUFAF5	NDUFAF5	0.842596	ovary	eQTL	Egg_Production_W16	3_8099756	0.96072
5038	SLC7A2	SLC7A2	0.778235	ovary	eQTL	Egg_Production_W18	4_17219482	0.98564
3026	LOC119713219	LOC119713219	0.891463	ovary	eQTL	Egg_Production_W22	19_12742334	0.94155
2710	LOC119713219	LOC119713219	0.974386	ovary	eQTL	Egg_Production_W23	19_12232120	0.99356
3026	LOC119713219	LOC119713219	0.51977	ovary	eQTL	Egg_Production_W25	19_12742334	0.86955
4704	ADPRM	ADPRM	0.414397	ovary	eQTL	Egg_Production_W26	19_12194222	0.83997
3026	LOC119713219	LOC119713219	0.465785	ovary	eQTL	Egg_Production_W29	19_12742334	0.88321
4716	DSG2	DSG2	0.511058	spleen	eQTL	Egg_Production_W2	2_46465844	0.96213
8663	SLC39A9	SLC39A9	0.806935	spleen	eQTL	Egg_Production_W2	5_37405951	0.98741
1702	TMEM255A	TMEM255A	0.842065	spleen	eQTL	Egg_Production_W2	10_1596887	0.89565
1820	XM_038184569.1|LOC119712977|chr10|-	LOC119712977	0.770179	spleen	apaQTL	Egg_Production_W2	10_6993683	0.99523
2130	LOC101790890	LOC101790890	0.439456	spleen	eQTL	Egg_Production_W17	19_11807282	0.80113
7963	XM_005008984.5|PDLIM3|chr4|+	PDLIM3	0.494443	spleen	apaQTL	Egg_Production_W18	4_20038124	0.91851
10016	chr8:22505840:22506729:clu_51304_-	LOC101796148	0.654355	spleen	sQTL	Egg_Production_W19	8_22446164	0.9817
1110	GLP2R	GLP2R	0.893832	spleen	eQTL	Egg_Production_W22	19_12842799	0.93476
794	GLP2R	GLP2R	0.748379	spleen	eQTL	Egg_Production_W23	19_12245235	0.95811
1110	GLP2R	GLP2R	0.786611	spleen	eQTL	Egg_Production_W24	19_12842799	0.97199
3207	LOC101790890	LOC101790890	0.653063	spleen	eQTL	Egg_Production_W24	19_11807282	0.90481
1110	GLP2R	GLP2R	0.448985	spleen	eQTL	Egg_Production_W25	19_12842799	0.95541
3264	LOC101790890	LOC101790890	0.590786	spleen	eQTL	Egg_Production_W25	19_11807282	0.90305
3264	LOC101790890	LOC101790890	0.858522	spleen	eQTL	Egg_Production_W27	19_11807282	0.99133
14118	LCLAT1	LCLAT1	0.714857	spleen	eQTL	Egg_Production_W28	3_17526707	0.85372
13659	chr3:17495270:17495812:clu_36215_+	LBH	0.714831	spleen	sQTL	Egg_Production_W28	3_17858648	0.93048
785	chr10:3719263:3719661:clu_8557_+	TMEM164	0.503947	shellgland	sQTL	Egg_Production_W2	10_4585629	0.8828
3364	XM_027443409.2|ACOT7|chr22|-	ACOT7	0.421539	shellgland	apaQTL	Egg_Production_W10	22_2412909	0.92546
3455	LOC101790890	LOC101790890	0.69746	shellgland	eQTL	Egg_Production_W22	19_11463219	0.81947
6648	XM_027471250.2|DNAH9|chr19|-	DNAH9	0.497553	shellgland	apaQTL	Egg_Production_W23	19_11949700	0.93087
4578	XM_027471250.2|DNAH9|chr19|-	DNAH9	0.451264	shellgland	apaQTL	Egg_Production_W24	19_11949700	0.90889
4635	XM_027471250.2|DNAH9|chr19|-	DNAH9	0.481411	shellgland	apaQTL	Egg_Production_W25	19_11949700	0.9614
4635	XM_027471250.2|DNAH9|chr19|-	DNAH9	0.461595	shellgland	apaQTL	Egg_Production_W27	19_11949700	0.98683
13145	LOC101800576	LOC101800576	0.782533	shellgland	eQTL	Egg_Production_W28	3_16731473	0.97535
6532	LOC101790890	LOC101790890	0.846475	shellgland	eQTL	Egg_Production_W28	19_11463219	0.85187
6532	LOC101790890	LOC101790890	0.786109	shellgland	eQTL	Egg_Production_W29	19_11463219	0.88309
6168	PAQR3	PAQR3	0.445134	liver	eQTL	Eggshell_reflectance	4_45314162	0.89554
12041	XM_027456905.2|ENOPH1|chr4|+	ENOPH1	0.860739	liver	apaQTL	Eggshell_reflectance	4_44457462	0.99996
10933	ABCG2	ABCG2	0.943544	shellgland	eQTL	Eggshell_reflectance	4_45302323	0.43884
12041	XM_027456905.2|ENOPH1|chr4|+	ENOPH1	0.840086	shellgland	apaQTL	Eggshell_reflectance	4_44457462	0.99871
