# Supplementary material for: Mapping multitissue regulatory variants reveals a liver-centric coexpression network associated with duck egg-laying performance
Source: HighWire-hosted journal article supplement (doi:10.1101/gr.280345.124), 2025-09-10
Supplement: Supplemental_Table_S9.xlsx [file Supplemental_Table_S9.xlsx]

## Sheet: Sheet1
Supplemental Table S9. The summary of causal mediation effect of molecular phenotypes on egg production and eggshell reflectance. ADE: average direct effect; ACME: average causal mediation effect; Total effect: overall effect.
SNP	Molecular Phenotype	GWAS	ACME Estimate	ACME CI Lower	ACME CI Upper	ACME p-value	ADE Estimate	ADE CI Lower	ADE CI Upper	ADE p-value	Total Effect Estimate	Total Effect CI Lower	Total Effect CI Upper	Total Effect p-value	Prop. Mediated Estimate	Prop. Mediated CI Lower	Prop. Mediated CI Upper	Prop. Mediated p-value
3_16731473	LOC101800576_shellgland	Egg_Production_Week28	-0.818	-1.208	-0.46	<2e-16	-0.229	-0.762	0.28	0.46	-1.047	-1.459	-0.6	<2e-16	0.786	0.409	1.39	<2e-16
19_11463219	LOC101790890_shellgland	Egg_Production_Week28	-0.332	-0.54	-0.17	<2e-16	-0.632	-1.015	-0.24	0.002	-0.964	-1.332	-0.59	<2e-16	0.34	0.171	0.63	<2e-16
19_11463219	LOC101790890_shellgland	Egg_Production_Week29	-0.325	-0.513	-0.17	<2e-16	-0.558	-0.945	-0.17	0.006	-0.882	-1.255	-0.51	<2e-16	0.359	0.18	0.7	<2e-16
4_45302323	ABCG2_shellgland	Eggshell_reflectance	-0.0362	-0.0593	-0.01	<2e-16	-0.081	-0.1162	-0.05	<2e-16	-0.1172	-0.1449	-0.09	<2e-16	0.3101	0.1225	0.52	<2e-16
19_12842799	GLP2R_spleen	Egg_Production_Week25	0.1808	0.0571	0.34	0.008	-0.7386	-1.0416	-0.43	<2e-16	-0.5578	-0.8473	-0.27	<2e-16	-0.3109	-0.9347	-0.09	0.008
4_44457462	XM_027456905.2|ENOPH1|chr4|+_shellgland	Eggshell_reflectance	0.02074	0.00274	0.04	0.022	0.03594	0.01106	0.06	0.004	0.05668	0.03759	0.08	<2e-16	0.35858	0.04661	0.77	0.022
4_44457462	XM_027456905.2|ENOPH1|chr4|+_liver	Eggshell_reflectance	0.01802	0.00159	0.04	0.03	0.03743	0.0115	0.06	0.004	0.05546	0.03598	0.08	<2e-16	0.31905	0.02877	0.72	0.03
19_12742334	LOC119713219_ovary	Egg_Production_Week29	-0.1389	-0.3049	-0.05	0.047	-0.4249	-0.7383	-0.1	0.004	-0.5639	-0.8429	-0.28	<2e-16	0.2465	-0.0291	0.7	0.047
19_12842799	GLP2R_spleen	Egg_Production_Week22	0.13192	-0.00242	0.27	0.054	-0.88238	-1.17002	-0.6	<2e-16	-0.75046	-1.01849	-0.49	<2e-16	-0.16909	-0.43739	0	0.054
4_17219482	SLC7A2_ovary	Egg_Production_Week18	-0.04419	-0.09421	0	0.056	-0.50005	-0.70119	-0.31	<2e-16	-0.54424	-0.73755	-0.35	<2e-16	0.0804	-0.00148	0.19	0.056
19_11949700	XM_027471250.2|DNAH9|chr19|-_shellgland	Egg_Production_Week23	0.1571	-0.0282	0.36	0.088	-0.9555	-1.366	-0.54	<2e-16	-0.7984	-1.173	-0.42	<2e-16	-0.1914	-0.5639	0.03	0.088
3_17858648	chr3:17495270:17495812:clu_36215_+_spleen	Egg_Production_Week28	0.0656	-0.0126	0.15	0.092	-0.6464	-0.8686	-0.44	<2e-16	-0.5808	-0.7943	-0.38	<2e-16	-0.1071	-0.304	0.02	0.092
19_11463219	LOC101790890_shellgland	Egg_Production_Week22	-0.1311	-0.3043	0.02	0.094	-0.7187	-1.1182	-0.36	<2e-16	-0.8498	-1.2166	-0.52	<2e-16	0.1503	-0.0225	0.4	0.094
3_8099756	NDUFAF5_ovary	Egg_Production_Week16	0.0504	-0.0154	0.12	0.12	-0.5279	-0.7376	-0.32	<2e-16	-0.4775	-0.6769	-0.27	<2e-16	-0.1034	-0.3226	0.03	0.12
3_17526707	LCLAT1_spleen	Egg_Production_Week28	-0.0557	-0.1498	0.01	0.12	-0.739	-1.0311	-0.47	<2e-16	-0.7947	-1.0853	-0.53	<2e-16	0.0645	-0.016	0.18	0.12
19_12245235	GLP2R_spleen	Egg_Production_Week23	0.0916	-0.0283	0.23	0.13	-0.8222	-1.1845	-0.48	<2e-16	-0.7306	-1.0464	-0.41	<2e-16	-0.121	-0.3969	0.04	0.13
22_2412909	XM_027443409.2|ACOT7|chr22|-_shellgland	Egg_Production_Week10	-0.058	-0.1433	0.02	0.13	-0.2468	-0.4688	-0.02	0.032	-0.3049	-0.5273	-0.09	0.006	0.1804	-0.0621	0.74	0.136
3_83730307	LOC110353100_ovary	Egg_Production_Week2	-0.0489	-0.1175	0.02	0.18	0.4132	0.2286	0.58	<2e-16	0.3642	0.193	0.52	<2e-16	-0.1314	-0.4156	0.05	0.18
19_12842799	GLP2R_spleen	Egg_Production_Week24	0.0887	-0.0394	0.23	0.18	-0.7529	-1.072	-0.45	<2e-16	-0.6642	-0.9435	-0.39	<2e-16	-0.1309	-0.4146	0.06	0.18
10_1058602	LOC110353173_ovary	Egg_Production_Week2	0.0951	-0.052	0.24	0.19	0.5513	0.238	0.85	<2e-16	0.6463	0.3556	0.92	<2e-16	0.1432	-0.0874	0.41	0.19
19_11807282	LOC101790890_spleen	Egg_Production_Week25	0.1018	-0.0583	0.26	0.21	-0.6945	-1.0329	-0.36	<2e-16	-0.5927	-0.8631	-0.33	<2e-16	-0.1711	-0.5686	0.11	0.21
19_11807282	LOC101790890_spleen	Egg_Production_Week24	0.0972	-0.0568	0.26	0.26	-0.7469	-1.0638	-0.4	<2e-16	-0.6497	-0.9318	-0.36	<2e-16	-0.1462	-0.4869	0.1	0.26
8_22446164	chr8:22505840:22506729:clu_51304_-_spleen	Egg_Production_Week19	-0.037	-0.1192	0.04	0.32	-0.8405	-1.1026	-0.59	<2e-16	-0.8775	-1.1452	-0.64	<2e-16	0.0407	-0.0503	0.14	0.32
5_37405951	SLC39A9_spleen	Egg_Production_Week2	-0.0381	-0.1363	0.04	0.35	1.1536	0.7729	1.53	<2e-16	1.1156	0.7452	1.5	<2e-16	-0.0301	-0.1404	0.04	0.35
10_1596887	TMEM255A_spleen	Egg_Production_Week2	-0.0211	-0.0891	0.02	0.4	1.1017	0.7709	1.41	<2e-16	1.0806	0.7446	1.39	<2e-16	-0.0149	-0.0903	0.02	0.4
4_45314162	PAQR3_liver	Eggshell_reflectance	-0.00195	-0.00843	0	0.45	-0.13328	-0.16122	-0.11	<2e-16	-0.13523	-0.16371	-0.11	<2e-16	0.01207	-0.02355	0.06	0.45
10_6993683	XM_038184569.1|LOC119712977|chr10|-_spleen	Egg_Production_Week2	-0.06	-0.217	0.08	0.46	0.611	0.299	0.89	<2e-16	0.551	0.296	0.8	<2e-16	-0.114	-0.465	0.19	0.46
19_11949700	XM_027471250.2|DNAH9|chr19|-_shellgland	Egg_Production_Week25	0.0669	-0.1336	0.25	0.47	-0.8097	-1.2239	-0.41	<2e-16	-0.7428	-1.1276	-0.36	<2e-16	-0.0874	-0.4452	0.18	0.47
19_12232120	LOC119713219_ovary	Egg_Production_Week23	0.0628	-0.1207	0.24	0.49	-1.0619	-1.4249	-0.7	<2e-16	-0.9991	-1.3231	-0.69	<2e-16	-0.062	-0.2603	0.13	0.49
2_46465844	DSG2_spleen	Egg_Production_Week2	0.0198	-0.0579	0.1	0.586	0.2951	0.0712	0.51	0.014	0.3148	0.0987	0.52	0.004	0.0646	-0.2186	0.44	0.59
19_12742334	LOC119713219_ovary	Egg_Production_Week25	-0.039	-0.1911	0.12	0.62	-0.5782	-0.9016	-0.26	<2e-16	-0.6172	-0.8968	-0.35	<2e-16	0.0627	-0.2109	0.37	0.62
19_12194222	ADPRM_ovary	Egg_Production_Week26	0.0176	-0.0605	0.1	0.65	-1.1377	-1.4416	-0.84	<2e-16	-1.1201	-1.4399	-0.83	<2e-16	-0.0139	-0.0973	0.05	0.65
19_11807282	LOC101790890_spleen	Egg_Production_Week17	-0.0275	-0.1975	0.13	0.734	-0.4411	-0.7638	-0.12	0.006	-0.4686	-0.7579	-0.19	<2e-16	0.0611	-0.3659	0.52	0.734
19_11807282	LOC101790890_spleen	Egg_Production_Week27	-0.0186	-0.1636	0.15	0.81	-0.6763	-0.9947	-0.36	<2e-16	-0.6949	-0.9669	-0.42	<2e-16	0.0279	-0.2501	0.26	0.81
4_20038124	XM_005008984.5|PDLIM3|chr4|+_spleen	Egg_Production_Week18	-0.00812	-0.10437	0.09	0.84	-0.75284	-1.06158	-0.43	<2e-16	-0.76096	-1.0645	-0.43	<2e-16	0.01219	-0.13113	0.14	0.84
3_82902910	UBE3D_ovary	Egg_Production_Week2	0.00381	-0.03254	0.04	0.844	0.32335	0.13105	0.52	0.004	0.32716	0.13511	0.53	0.002	0.00976	-0.12557	0.17	0.846
3_8099052	XM_027453326.2|ESF1|chr3|+_liver	Egg_Production_Week16	-0.0103	-0.1078	0.08	0.87	-0.4937	-0.7276	-0.26	<2e-16	-0.504	-0.7257	-0.28	<2e-16	0.0172	-0.1739	0.24	0.87
10_4585629	chr10:3719263:3719661:clu_8557_+_ovary	Egg_Production_Week2	0.00624	-0.07519	0.1	0.88	0.59018	0.35369	0.82	<2e-16	0.59643	0.36262	0.82	<2e-16	0.01047	-0.13448	0.17	0.88
19_12742334	LOC119713219_ovary	Egg_Production_Week22	-0.00785	-0.16971	0.15	0.92	-0.78367	-1.08335	-0.48	<2e-16	-0.79152	-1.05356	-0.52	<2e-16	0.00977	-0.20218	0.22	0.92
4_44390424	COQ2_liver	Egg_Production_Week10	0.00288	-0.04593	0.06	0.93	-0.32669	-0.51016	-0.14	<2e-16	-0.3238	-0.49824	-0.15	<2e-16	-0.00652	-0.21473	0.16	0.93
19_11949700	XM_027471250.2|DNAH9|chr19|-_shellgland	Egg_Production_Week27	-0.00719	-0.19211	0.18	0.94	-0.84836	-1.27395	-0.42	<2e-16	-0.85555	-1.24271	-0.48	<2e-16	0.00814	-0.21431	0.26	0.94
10_4585629	chr10:3719263:3719661:clu_8557_+_shellgland	Egg_Production_Week2	0.000311	-0.071142	0.07	0.96	0.626648	0.346641	0.91	<2e-16	0.626959	0.338671	0.9	<2e-16	0.002641	-0.125548	0.12	0.96
19_11949700	XM_027471250.2|DNAH9|chr19|-_shellgland	Egg_Production_Week24	-0.00342	-0.19933	0.19	0.978	-0.72051	-1.14843	-0.31	0.004	-0.72394	-1.08066	-0.35	<2e-16	0.00237	-0.27876	0.32	0.978
3_17472979	MSH2_liver	Egg_Production_Week28	-0.00129	-0.0988	0.09	0.98	-0.40339	-0.59263	-0.22	<2e-16	-0.40468	-0.62379	-0.2	<2e-16	0.00328	-0.38447	0.22	0.98
