# Supplementary material for: Mapping multitissue regulatory variants reveals a liver-centric coexpression network associated with duck egg-laying performance
Source: HighWire-hosted journal article supplement (doi:10.1101/gr.280345.124), 2025-09-10
Supplement: Supplemental_Table_S10.xlsx [file Supplemental_Table_S10.xlsx]

## Sheet: Sheet1
Supplemental Table S10. The GO terms in which the genes associated with the GWAS loci of the weekly egg production.
ID	Description	GeneRatio	BgRatio	pvalue	p.adjust	qvalue	geneID	Count
GO:0046434	organophosphate catabolic process	1/6	10/2031	0.0292164	0.325226	0.325226	ITPA	1
GO:0009141	nucleoside triphosphate metabolic process	1/6	14/2031	0.040702	0.325226	0.325226	ITPA	1
GO:0009060	aerobic respiration	1/6	18/2031	0.0520741	0.325226	0.325226	MTFR1	1
GO:1990748	cellular detoxification	1/6	18/2031	0.0520741	0.325226	0.325226	AKR1A1	1
GO:0002181	cytoplasmic translation	1/6	19/2031	0.0548995	0.325226	0.325226	EIF3H	1
GO:0045333	cellular respiration	1/6	19/2031	0.0548995	0.325226	0.325226	MTFR1	1
GO:0097237	cellular response to toxic substance	1/6	19/2031	0.0548995	0.325226	0.325226	AKR1A1	1
GO:0098754	detoxification	1/6	19/2031	0.0548995	0.325226	0.325226	AKR1A1	1
GO:0044248	cellular catabolic process	2/6	135/2031	0.0551242	0.325226	0.325226	ITPA/AKR1A1	2
GO:0006413	translational initiation	1/6	22/2031	0.0633337	0.325226	0.325226	EIF3H	1
GO:0009636	response to toxic substance	1/6	24/2031	0.0689216	0.325226	0.325226	AKR1A1	1
GO:0015980	energy derivation by oxidation of organic compounds	1/6	24/2031	0.0689216	0.325226	0.325226	MTFR1	1
GO:0022618	protein-RNA complex assembly	1/6	29/2031	0.0827698	0.325226	0.325226	EIF3H	1
GO:0071826	protein-RNA complex organization	1/6	30/2031	0.0855187	0.325226	0.325226	EIF3H	1
GO:1901575	organic substance catabolic process	2/6	179/2031	0.0914676	0.325226	0.325226	ITPA/AKR1A1	2
GO:0007005	mitochondrion organization	1/6	35/2031	0.0991607	0.325226	0.325226	MTFR1	1
GO:0006091	generation of precursor metabolites and energy	1/6	42/2031	0.117974	0.325226	0.325226	MTFR1	1
GO:0009056	catabolic process	2/6	212/2031	0.122755	0.325226	0.325226	ITPA/AKR1A1	2
GO:0048285	organelle fission	1/6	45/2031	0.125936	0.325226	0.325226	MTFR1	1
GO:0009117	nucleotide metabolic process	1/6	46/2031	0.128577	0.325226	0.325226	ITPA	1
GO:0034655	nucleobase-containing compound catabolic process	1/6	47/2031	0.131211	0.325226	0.325226	ITPA	1
GO:0006753	nucleoside phosphate metabolic process	1/6	49/2031	0.136459	0.325226	0.325226	ITPA	1
GO:0044270	cellular nitrogen compound catabolic process	1/6	49/2031	0.136459	0.325226	0.325226	ITPA	1
GO:0046700	heterocycle catabolic process	1/6	49/2031	0.136459	0.325226	0.325226	ITPA	1
GO:0019439	aromatic compound catabolic process	1/6	50/2031	0.139073	0.325226	0.325226	ITPA	1
GO:1901361	organic cyclic compound catabolic process	1/6	50/2031	0.139073	0.325226	0.325226	ITPA	1
GO:0055086	nucleobase-containing small molecule metabolic process	1/6	52/2031	0.144282	0.325226	0.325226	ITPA	1
GO:0016567	protein ubiquitination	1/6	53/2031	0.146876	0.325226	0.325226	UBAC1	1
GO:0022613	ribonucleoprotein complex biogenesis	1/6	62/2031	0.169932	0.351193	0.351193	EIF3H	1
GO:0051604	protein maturation	1/6	62/2031	0.169932	0.351193	0.351193	UBAC1	1
GO:0032446	protein modification by small protein conjugation	1/6	69/2031	0.187504	0.375007	0.375007	UBAC1	1
GO:1901701	cellular response to oxygen-containing compound	1/6	73/2031	0.197404	0.382471	0.382471	AKR1A1	1
GO:0070647	protein modification by small protein conjugation or removal	1/6	82/2031	0.219314	0.412045	0.412045	UBAC1	1
GO:0019637	organophosphate metabolic process	1/6	90/2031	0.238369	0.434571	0.434571	ITPA	1
GO:0006412	translation	1/6	97/2031	0.254722	0.434571	0.434571	EIF3H	1
GO:0043043	peptide biosynthetic process	1/6	98/2031	0.257034	0.434571	0.434571	EIF3H	1
GO:0043687	post-translational protein modification	1/6	99/2031	0.259341	0.434571	0.434571	UBAC1	1
GO:0006518	peptide metabolic process	1/6	106/2031	0.275317	0.444156	0.444156	EIF3H	1
GO:0006629	lipid metabolic process	1/6	109/2031	0.282076	0.444156	0.444156	AKR1A1	1
GO:0043604	amide biosynthetic process	1/6	111/2031	0.286552	0.444156	0.444156	EIF3H	1
GO:1901700	response to oxygen-containing compound	1/6	117/2031	0.299843	0.453421	0.453421	AKR1A1	1
GO:0043603	amide metabolic process	1/6	130/2031	0.327932	0.481983	0.481983	EIF3H	1
GO:0055085	transmembrane transport	1/6	133/2031	0.334279	0.481983	0.481983	SLC37A3	1
GO:0065003	protein-containing complex assembly	1/6	165/2031	0.398928	0.562127	0.562127	EIF3H	1
GO:0044281	small molecule metabolic process	1/6	176/2031	0.419905	0.578536	0.578536	ITPA	1
GO:0010033	response to organic substance	1/6	186/2031	0.438442	0.583182	0.583182	AKR1A1	1
GO:0070887	cellular response to chemical stimulus	1/6	188/2031	0.442089	0.583182	0.583182	AKR1A1	1
GO:0019538	protein metabolic process	2/6	498/2031	0.45477	0.587411	0.587411	UBAC1/EIF3H	2
GO:1901566	organonitrogen compound biosynthetic process	1/6	215/2031	0.48943	0.619279	0.619279	EIF3H	1
GO:0071702	organic substance transport	1/6	233/2031	0.519092	0.643674	0.643674	SLC37A3	1
GO:0043933	protein-containing complex organization	1/6	257/2031	0.556395	0.663059	0.663059	EIF3H	1
GO:0006796	phosphate-containing compound metabolic process	1/6	263/2031	0.565334	0.663059	0.663059	ITPA	1
GO:0006793	phosphorus metabolic process	1/6	264/2031	0.566809	0.663059	0.663059	ITPA	1
GO:0042221	response to chemical	1/6	274/2031	0.581332	0.667455	0.667455	AKR1A1	1
GO:0036211	protein modification process	1/6	295/2031	0.610513	0.683334	0.683334	UBAC1	1
GO:0022607	cellular component assembly	1/6	300/2031	0.617205	0.683334	0.683334	EIF3H	1
GO:0043412	macromolecule modification	1/6	315/2031	0.636709	0.692561	0.692561	UBAC1	1
GO:0044085	cellular component biogenesis	1/6	333/2031	0.659014	0.704463	0.704463	EIF3H	1
GO:0006996	organelle organization	1/6	365/2031	0.695851	0.731233	0.731233	MTFR1	1
GO:0006810	transport	1/6	410/2031	0.741996	0.76673	0.76673	SLC37A3	1
GO:0051234	establishment of localization	1/6	429/2031	0.759644	0.772097	0.772097	SLC37A3	1
GO:0051179	localization	1/6	485/2031	0.805916	0.805916	0.805916	SLC37A3	1
