# Supplementary material for: Mapping multitissue regulatory variants reveals a liver-centric coexpression network associated with duck egg-laying performance
Source: HighWire-hosted journal article supplement (doi:10.1101/gr.280345.124), 2025-09-10
Supplement: Supplemental_Table_S11.xlsx [file Supplemental_Table_S11.xlsx]

## Sheet: Sheet1
Supplemental Table 11. The summary of co-expression modules and the genes involved.
Gene	Module	Tissue
A4GALT	ME1	Liver
AAGAB	ME1	Liver
AAK1	ME1	Liver
AASDH	ME1	Liver
AATK	ME1	Liver
ABCB6	ME1	Liver
ABCC10	ME1	Liver
ABCC1	ME1	Liver
ABCC3	ME1	Liver
ABCE1	ME1	Liver
ABCG1	ME1	Liver
ABCG2	ME1	Liver
ABCG4	ME1	Liver
ABCG5	ME1	Liver
ABHD10	ME1	Liver
ABHD12	ME1	Liver
ABHD13	ME1	Liver
ABI1	ME1	Liver
ABI2	ME1	Liver
ABL1	ME1	Liver
ABR	ME1	Liver
ABRAXAS2	ME1	Liver
ABTB1	ME1	Liver
ACACB	ME1	Liver
ACAP2	ME1	Liver
ACAP3	ME1	Liver
ACBD3	ME1	Liver
ACBD6	ME1	Liver
ACCS	ME1	Liver
ACKR1	ME1	Liver
ACKR2	ME1	Liver
ACKR3	ME1	Liver
ACKR4	ME1	Liver
ACOD1	ME1	Liver
ACOT11	ME1	Liver
ACOT9	ME1	Liver
ACP2	ME1	Liver
ACSBG1	ME1	Liver
ACSL3	ME1	Liver
ACSL4	ME1	Liver
ACSL6	ME1	Liver
ACSS1	ME1	Liver
ACTA2	ME1	Liver
ACTB	ME1	Liver
ACTG2	ME1	Liver
ACTL6A	ME1	Liver
ACTN1	ME1	Liver
ACTR10	ME1	Liver
ACTR2	ME1	Liver
ACTR3	ME1	Liver
ACTR6	ME1	Liver
ACTR8	ME1	Liver
ACVR1	ME1	Liver
ADA	ME1	Liver
ADAL	ME1	Liver
ADAM10	ME1	Liver
ADAM11	ME1	Liver
ADAM12	ME1	Liver
ADAM15	ME1	Liver
ADAM17	ME1	Liver
ADAM19	ME1	Liver
ADAM33	ME1	Liver
ADAM8	ME1	Liver
ADAMTS10	ME1	Liver
ADAMTS1	ME1	Liver
ADAMTS20	ME1	Liver
ADAMTS2	ME1	Liver
ADAMTS3	ME1	Liver
ADAMTS6	ME1	Liver
ADAMTS7	ME1	Liver
ADAMTS8	ME1	Liver
ADAMTS9	ME1	Liver
ADAMTSL2	ME1	Liver
ADAMTSL3	ME1	Liver
ADAP2	ME1	Liver
ADAR	ME1	Liver
ADARB1	ME1	Liver
ADCY2	ME1	Liver
ADCY3	ME1	Liver
ADCY5	ME1	Liver
ADCY7	ME1	Liver
ADCY9	ME1	Liver
ADD1	ME1	Liver
ADD2	ME1	Liver
ADD3	ME1	Liver
ADGRA1	ME1	Liver
ADGRA2	ME1	Liver
ADGRA3	ME1	Liver
ADGRB2	ME1	Liver
ADGRD1	ME1	Liver
ADGRG1	ME1	Liver
ADGRG2	ME1	Liver
ADGRG3	ME1	Liver
ADGRG5	ME1	Liver
ADGRG6	ME1	Liver
ADGRL2	ME1	Liver
ADIPOR1	ME1	Liver
ADNP2	ME1	Liver
ADO	ME1	Liver
ADORA2A	ME1	Liver
ADORA2B	ME1	Liver
ADRA2C	ME1	Liver
ADSL	ME1	Liver
ADSS1	ME1	Liver
ADSS2	ME1	Liver
AEBP2	ME1	Liver
AFAP1	ME1	Liver
AFAP1L1	ME1	Liver
AFAP1L2	ME1	Liver
AFDN	ME1	Liver
AFF2	ME1	Liver
AFG3L2	ME1	Liver
AGAP1	ME1	Liver
AGGF1	ME1	Liver
AGO3	ME1	Liver
AGO4	ME1	Liver
AGPAT5	ME1	Liver
AGPS	ME1	Liver
AGR2	ME1	Liver
AGRN	ME1	Liver
AGTPBP1	ME1	Liver
AGTR2	ME1	Liver
AHCYL2	ME1	Liver
AHDC1	ME1	Liver
AHI1	ME1	Liver
AHSA2P	ME1	Liver
AIDA	ME1	Liver
AK3	ME1	Liver
AK6	ME1	Liver
AK8	ME1	Liver
AKAP10	ME1	Liver
AKAP11	ME1	Liver
AKAP12	ME1	Liver
AKAP6	ME1	Liver
AKAP8	ME1	Liver
AKAP8L	ME1	Liver
AKNA	ME1	Liver
AKT3	ME1	Liver
ALCAM	ME1	Liver
ALDH1A3	ME1	Liver
ALDOC	ME1	Liver
ALG6	ME1	Liver
ALMS1	ME1	Liver
ALOX5	ME1	Liver
ALS2CL	ME1	Liver
AMBRA1	ME1	Liver
AMD1	ME1	Liver
AMDHD2	ME1	Liver
AMER1	ME1	Liver
AMIGO2	ME1	Liver
AMMECR1	ME1	Liver
AMOT	ME1	Liver
AMOTL1	ME1	Liver
AMOTL2	ME1	Liver
AMPD3	ME1	Liver
AMPH	ME1	Liver
ANAPC10	ME1	Liver
ANAPC4	ME1	Liver
ANAPC7	ME1	Liver
ANGEL2	ME1	Liver
ANGPT2	ME1	Liver
ANGPT4	ME1	Liver
ANGPTL2	ME1	Liver
ANGPTL5	ME1	Liver
ANK1	ME1	Liver
ANK2	ME1	Liver
ANKIB1	ME1	Liver
ANKRD11	ME1	Liver
ANKRD12	ME1	Liver
ANKRD13A	ME1	Liver
ANKRD13B	ME1	Liver
ANKRD13C	ME1	Liver
ANKRD17	ME1	Liver
ANKRD27	ME1	Liver
ANKRD28	ME1	Liver
ANKRD33B	ME1	Liver
ANKRD37	ME1	Liver
ANKRD44	ME1	Liver
ANKRD46	ME1	Liver
ANKRD50	ME1	Liver
ANKRD60	ME1	Liver
ANKRD6	ME1	Liver
ANKS1A	ME1	Liver
ANKS1B	ME1	Liver
ANKS6	ME1	Liver
ANLN	ME1	Liver
ANO10	ME1	Liver
ANO3	ME1	Liver
ANO6	ME1	Liver
ANP32E	ME1	Liver
ANTXR1	ME1	Liver
ANTXRL	ME1	Liver
ANXA13	ME1	Liver
ANXA2	ME1	Liver
ANXA4	ME1	Liver
ANXA5	ME1	Liver
ANXA7	ME1	Liver
AOAH	ME1	Liver
AOPEP	ME1	Liver
AP1G1	ME1	Liver
AP1M1	ME1	Liver
AP1S2	ME1	Liver
AP2A2	ME1	Liver
AP2B1	ME1	Liver
AP3B1	ME1	Liver
AP3B2	ME1	Liver
AP3D1	ME1	Liver
AP4B1	ME1	Liver
AP4E1	ME1	Liver
AP5M1	ME1	Liver
AP5Z1	ME1	Liver
APAF1	ME1	Liver
APBA2	ME1	Liver
APBB2	ME1	Liver
APBB3	ME1	Liver
API5	ME1	Liver
APLF	ME1	Liver
APPBP2	ME1	Liver
APPL1	ME1	Liver
AQR	ME1	Liver
ARAP2	ME1	Liver
ARAP3	ME1	Liver
AREL1	ME1	Liver
ARF1	ME1	Liver
ARFGAP1	ME1	Liver
ARFGEF3	ME1	Liver
ARFIP1	ME1	Liver
ARGLU1	ME1	Liver
ARHGAP10	ME1	Liver
ARHGAP15	ME1	Liver
ARHGAP17	ME1	Liver
ARHGAP19	ME1	Liver
ARHGAP20	ME1	Liver
ARHGAP21	ME1	Liver
ARHGAP22	ME1	Liver
ARHGAP23	ME1	Liver
ARHGAP24	ME1	Liver
ARHGAP25	ME1	Liver
ARHGAP26	ME1	Liver
ARHGAP27	ME1	Liver
ARHGAP28	ME1	Liver
ARHGAP29	ME1	Liver
ARHGAP31	ME1	Liver
ARHGAP40	ME1	Liver
ARHGAP45	ME1	Liver
ARHGAP5	ME1	Liver
ARHGAP6	ME1	Liver
ARHGAP8	ME1	Liver
ARHGDIA	ME1	Liver
ARHGDIB	ME1	Liver
ARHGEF10	ME1	Liver
ARHGEF10L	ME1	Liver
ARHGEF12	ME1	Liver
ARHGEF17	ME1	Liver
ARHGEF18	ME1	Liver
ARHGEF28	ME1	Liver
ARHGEF4	ME1	Liver
ARHGEF6	ME1	Liver
ARHGEF7	ME1	Liver
ARHGEF9	ME1	Liver
ARID1A	ME1	Liver
ARID1B	ME1	Liver
ARID2	ME1	Liver
ARID3A	ME1	Liver
ARID4A	ME1	Liver
ARID4B	ME1	Liver
ARID5B	ME1	Liver
ARIH2	ME1	Liver
ARL4A	ME1	Liver
ARL4C	ME1	Liver
ARL5A	ME1	Liver
ARL5B	ME1	Liver
ARL6	ME1	Liver
ARL6IP1	ME1	Liver
ARL6IP5	ME1	Liver
ARL8A	ME1	Liver
ARL8B	ME1	Liver
ARL9	ME1	Liver
ARMC2	ME1	Liver
ARMC8	ME1	Liver
ARMC9	ME1	Liver
ARMH4	ME1	Liver
ARNT2	ME1	Liver
ARNTL2	ME1	Liver
ARNTL	ME1	Liver
ARPC1A	ME1	Liver
ARPC1B	ME1	Liver
ARPC3	ME1	Liver
ARPC5	ME1	Liver
ARPP19	ME1	Liver
ARPP21	ME1	Liver
ARRDC1	ME1	Liver
ARSB	ME1	Liver
ARSG	ME1	Liver
ARSJ	ME1	Liver
ARVCF	ME1	Liver
ASAH1	ME1	Liver
ASAP1	ME1	Liver
ASAP2	ME1	Liver
ASAP3	ME1	Liver
ASB2	ME1	Liver
ASB6	ME1	Liver
ASB7	ME1	Liver
ASCC2	ME1	Liver
ASH1L	ME1	Liver
ASH2L	ME1	Liver
ASIC3	ME1	Liver
ASIP	ME1	Liver
ASL	ME1	Liver
ASNSD1	ME1	Liver
ASPM	ME1	Liver
ASPN	ME1	Liver
ASXL1	ME1	Liver
ASXL3	ME1	Liver
ATAD1	ME1	Liver
ATAD2B	ME1	Liver
ATAD5	ME1	Liver
ATF2	ME1	Liver
ATF6	ME1	Liver
ATG3	ME1	Liver
ATG4C	ME1	Liver
ATG5	ME1	Liver
ATG7	ME1	Liver
ATMIN	ME1	Liver
ATP10A	ME1	Liver
ATP10D	ME1	Liver
ATP11A	ME1	Liver
ATP11B	ME1	Liver
ATP1B3	ME1	Liver
ATP2A2	ME1	Liver
ATP2A3	ME1	Liver
ATP2B1	ME1	Liver
ATP2B2	ME1	Liver
ATP2B4	ME1	Liver
ATP2C1	ME1	Liver
ATP6AP1	ME1	Liver
ATP6AP2	ME1	Liver
ATP6V0A1	ME1	Liver
ATP6V0A2	ME1	Liver
ATP6V0C	ME1	Liver
ATP6V0E1	ME1	Liver
ATP6V1A	ME1	Liver
ATP6V1B2	ME1	Liver
ATP6V1C1	ME1	Liver
ATP6V1D	ME1	Liver
ATP6V1G1	ME1	Liver
ATP6V1G3	ME1	Liver
ATP7A	ME1	Liver
ATP8A1	ME1	Liver
ATP8B2	ME1	Liver
ATP9B	ME1	Liver
ATR	ME1	Liver
ATRX	ME1	Liver
ATXN1	ME1	Liver
ATXN1L	ME1	Liver
ATXN2	ME1	Liver
ATXN3	ME1	Liver
ATXN7	ME1	Liver
ATXN7L1	ME1	Liver
AURKA	ME1	Liver
AVL9	ME1	Liver
B3GALT6	ME1	Liver
B3GAT2	ME1	Liver
B3GLCT	ME1	Liver
B3GNT2	ME1	Liver
B3GNT4	ME1	Liver
B3GNT5	ME1	Liver
B3GNT7	ME1	Liver
B3GNT9	ME1	Liver
B4GALNT4	ME1	Liver
B4GALT1	ME1	Liver
B9D1	ME1	Liver
BABAM2	ME1	Liver
BACE2	ME1	Liver
BACH1	ME1	Liver
BAG1	ME1	Liver
BAG2	ME1	Liver
BAG5	ME1	Liver
BAHCC1	ME1	Liver
BAHD1	ME1	Liver
BAK1	ME1	Liver
BANK1	ME1	Liver
BAP1	ME1	Liver
BARD1	ME1	Liver
BARX2	ME1	Liver
BATF	ME1	Liver
BAZ1A	ME1	Liver
BAZ1B	ME1	Liver
BAZ2B	ME1	Liver
BBS12	ME1	Liver
BBS4	ME1	Liver
BBS7	ME1	Liver
BBS9	ME1	Liver
BBX	ME1	Liver
BCAP29	ME1	Liver
BCAR1	ME1	Liver
BCAS1	ME1	Liver
BCAT1	ME1	Liver
BCL10	ME1	Liver
BCL11A	ME1	Liver
BCL11B	ME1	Liver
BCL2	ME1	Liver
BCL2A1	ME1	Liver
BCL2L10	ME1	Liver
BCL2L11	ME1	Liver
BCL2L15	ME1	Liver
BCL9	ME1	Liver
BCL9L	ME1	Liver
BCLAF1	ME1	Liver
BCO2	ME1	Liver
BCOR	ME1	Liver
BCORL1	ME1	Liver
BCR	ME1	Liver
BDKRB2	ME1	Liver
BEND2	ME1	Liver
BEND6	ME1	Liver
BET1L	ME1	Liver
BFAR	ME1	Liver
BHLHE41	ME1	Liver
BICC1	ME1	Liver
BICD2	ME1	Liver
BICRAL	ME1	Liver
BIN1	ME1	Liver
BIRC5	ME1	Liver
BLK	ME1	Liver
BLM	ME1	Liver
BLNK	ME1	Liver
BLOC1S4	ME1	Liver
BLOC1S5	ME1	Liver
BLOC1S6	ME1	Liver
BLVRA	ME1	Liver
BMP2	ME1	Liver
BMP2K	ME1	Liver
BMPR1A	ME1	Liver
BNC2	ME1	Liver
BNIP2	ME1	Liver
BOC	ME1	Liver
BOK	ME1	Liver
BORA	ME1	Liver
BPGM	ME1	Liver
BPNT2	ME1	Liver
BPTF	ME1	Liver
BRAF	ME1	Liver
BRAT1	ME1	Liver
BRCA1	ME1	Liver
BRCA2	ME1	Liver
BRD1	ME1	Liver
BRD3	ME1	Liver
BRD7	ME1	Liver
BRF1	ME1	Liver
BRINP3	ME1	Liver
BRMS1L	ME1	Liver
BROX	ME1	Liver
BRWD1	ME1	Liver
BRWD3	ME1	Liver
BTAF1	ME1	Liver
BTBD10	ME1	Liver
BTBD11	ME1	Liver
BTBD2	ME1	Liver
BTBD3	ME1	Liver
BTBD7	ME1	Liver
BTBD8	ME1	Liver
BTBD9	ME1	Liver
BTG2	ME1	Liver
BTK	ME1	Liver
BTLA	ME1	Liver
BTRC	ME1	Liver
BUB1	ME1	Liver
BUB1B	ME1	Liver
BUB3	ME1	Liver
BUD13	ME1	Liver
BZW2	ME1	Liver
C10H8orf48	ME1	Liver
C11H15orf48	ME1	Liver
C12H16orf70	ME1	Liver
C13H3orf14	ME1	Liver
C13H3orf18	ME1	Liver
C14H5orf15	ME1	Liver
C14H5orf58	ME1	Liver
C15H16orf72	ME1	Liver
C16H12orf43	ME1	Liver
C1GALT1	ME1	Liver
C1H12orf29	ME1	Liver
C1H12orf4	ME1	Liver
C1H12orf45	ME1	Liver
C1H21orf91	ME1	Liver
C1H2orf49	ME1	Liver
C1QTNF2	ME1	Liver
C1QTNF5	ME1	Liver
C1QTNF6	ME1	Liver
C22H1orf159	ME1	Liver
C23H2orf42	ME1	Liver
C24H1orf109	ME1	Liver
C24H1orf216	ME1	Liver
C29H19orf44	ME1	Liver
C2CD2	ME1	Liver
C2CD2L	ME1	Liver
C2CD3	ME1	Liver
C2H6orf62	ME1	Liver
C2H8orf37	ME1	Liver
C3AR1	ME1	Liver
C3H1orf198	ME1	Liver
C4H4orf19	ME1	Liver
C4H4orf33	ME1	Liver
C4H4orf48	ME1	Liver
C4H4orf50	ME1	Liver
C5H11orf16	ME1	Liver
C5H11orf24	ME1	Liver
C6H10orf88	ME1	Liver
C6H10orf90	ME1	Liver
C7	ME1	Liver
C7H2orf69	ME1	Liver
C8H1orf112	ME1	Liver
C8H1orf21	ME1	Liver
C9H3orf70	ME1	Liver
C9orf72	ME1	Liver
CAB39	ME1	Liver
CAB39L	ME1	Liver
CABIN1	ME1	Liver
CABLES2	ME1	Liver
CACHD1	ME1	Liver
CACNA1C	ME1	Liver
CACNA2D1	ME1	Liver
CACNA2D2	ME1	Liver
CACNB2	ME1	Liver
CACNG3	ME1	Liver
CADPS2	ME1	Liver
CALCOCO2	ME1	Liver
CALD1	ME1	Liver
CALHM2	ME1	Liver
CALM2	ME1	Liver
CAMK1	ME1	Liver
CAMK1D	ME1	Liver
CAMK2D	ME1	Liver
CAMK2G	ME1	Liver
CAMK2N2	ME1	Liver
CAMLG	ME1	Liver
CAMSAP1	ME1	Liver
CAMSAP2	ME1	Liver
CAMTA1	ME1	Liver
CANT1	ME1	Liver
CAP1	ME1	Liver
CAP2	ME1	Liver
CAPN11	ME1	Liver
CAPN15	ME1	Liver
CAPN2	ME1	Liver
CAPN3	ME1	Liver
CAPN6	ME1	Liver
CAPNS2	ME1	Liver
CAPRIN1	ME1	Liver
CAPSL	ME1	Liver
CAPZA1	ME1	Liver
CAPZA2	ME1	Liver
CAPZB	ME1	Liver
CARD10	ME1	Liver
CARD11	ME1	Liver
CARD19	ME1	Liver
CARD9	ME1	Liver
CARF	ME1	Liver
CARMIL1	ME1	Liver
CARMIL2	ME1	Liver
CARNMT1	ME1	Liver
CASD1	ME1	Liver
CASK	ME1	Liver
CASP2	ME1	Liver
CASP3	ME1	Liver
CASP8AP2	ME1	Liver
CASS4	ME1	Liver
CAST	ME1	Liver
CASZ1	ME1	Liver
CAVIN1	ME1	Liver
CAVIN2	ME1	Liver
CBFA2T2	ME1	Liver
CBFA2T3	ME1	Liver
CBFB	ME1	Liver
CBL	ME1	Liver
CBLB	ME1	Liver
CBLL1	ME1	Liver
CBLN1	ME1	Liver
CBWD1	ME1	Liver
CBX1	ME1	Liver
CBX2	ME1	Liver
CBX3	ME1	Liver
CBX4	ME1	Liver
CBX6	ME1	Liver
CBX7	ME1	Liver
CBX8	ME1	Liver
CBY1	ME1	Liver
CC2D1B	ME1	Liver
CC2D2A	ME1	Liver
CCAR1	ME1	Liver
CCDC102A	ME1	Liver
CCDC102B	ME1	Liver
CCDC117	ME1	Liver
CCDC127	ME1	Liver
CCDC171	ME1	Liver
CCDC174	ME1	Liver
CCDC186	ME1	Liver
CCDC198	ME1	Liver
CCDC43	ME1	Liver
CCDC50	ME1	Liver
CCDC69	ME1	Liver
CCDC71	ME1	Liver
CCDC77	ME1	Liver
CCDC80	ME1	Liver
CCDC88A	ME1	Liver
CCDC88C	ME1	Liver
CCDC92	ME1	Liver
CCDC93	ME1	Liver
CCDC9B	ME1	Liver
CCL20	ME1	Liver
CCL26	ME1	Liver
CCN3	ME1	Liver
CCN4	ME1	Liver
CCN5	ME1	Liver
CCNA2	ME1	Liver
CCNB2	ME1	Liver
CCNB3	ME1	Liver
CCNC	ME1	Liver
CCND3	ME1	Liver
CCNE1	ME1	Liver
CCNF	ME1	Liver
CCNI	ME1	Liver
CCNJ	ME1	Liver
CCNL1	ME1	Liver
CCNL2	ME1	Liver
CCNT2	ME1	Liver
CCP110	ME1	Liver
CCPG1	ME1	Liver
CCR10	ME1	Liver
CCR4	ME1	Liver
CCR6	ME1	Liver
CCR7	ME1	Liver
CD109	ME1	Liver
CD151	ME1	Liver
CD274	ME1	Liver
CD34	ME1	Liver
CD3E	ME1	Liver
CD40LG	ME1	Liver
CD44	ME1	Liver
CD5	ME1	Liver
CD58	ME1	Liver
CD6	ME1	Liver
CD79B	ME1	Liver
CD82	ME1	Liver
CD83	ME1	Liver
CD86	ME1	Liver
CD8A	ME1	Liver
CD99	ME1	Liver
CDAN1	ME1	Liver
CDC14B	ME1	Liver
CDC16	ME1	Liver
CDC20	ME1	Liver
CDC23	ME1	Liver
CDC27	ME1	Liver
CDC37L1	ME1	Liver
CDC40	ME1	Liver
CDC42	ME1	Liver
CDC42EP3	ME1	Liver
CDC45	ME1	Liver
CDC5L	ME1	Liver
CDC7	ME1	Liver
CDCA2	ME1	Liver
CDCA3	ME1	Liver
CDCA4	ME1	Liver
CDCA7	ME1	Liver
CDCA8	ME1	Liver
CDH11	ME1	Liver
CDH13	ME1	Liver
CDH3	ME1	Liver
CDHR3	ME1	Liver
CDHR5	ME1	Liver
CDK17	ME1	Liver
CDK19	ME1	Liver
CDK2AP1	ME1	Liver
CDK5RAP2	ME1	Liver
CDK6	ME1	Liver
CDK7	ME1	Liver
CDKAL1	ME1	Liver
CDKL1	ME1	Liver
CDKL2	ME1	Liver
CDKN1B	ME1	Liver
CDKN1C	ME1	Liver
CDKN2C	ME1	Liver
CDO1	ME1	Liver
CDPF1	ME1	Liver
CDR2L	ME1	Liver
CDS1	ME1	Liver
CDS2	ME1	Liver
CDT1	ME1	Liver
CDYL2	ME1	Liver
CDYL	ME1	Liver
CELF1	ME1	Liver
CELF2	ME1	Liver
CELSR1	ME1	Liver
CELSR2	ME1	Liver
CELSR3	ME1	Liver
CEMIP2	ME1	Liver
CENPF	ME1	Liver
CENPH	ME1	Liver
CENPI	ME1	Liver
CENPJ	ME1	Liver
CENPK	ME1	Liver
CENPL	ME1	Liver
CENPN	ME1	Liver
CENPO	ME1	Liver
CENPT	ME1	Liver
CENPU	ME1	Liver
CENPW	ME1	Liver
CEP104	ME1	Liver
CEP112	ME1	Liver
CEP128	ME1	Liver
CEP131	ME1	Liver
CEP135	ME1	Liver
CEP152	ME1	Liver
CEP162	ME1	Liver
CEP164	ME1	Liver
CEP170	ME1	Liver
CEP170B	ME1	Liver
CEP19	ME1	Liver
CEP250	ME1	Liver
CEP290	ME1	Liver
CEP295	ME1	Liver
CEP41	ME1	Liver
CEP43	ME1	Liver
CEP55	ME1	Liver
CEP63	ME1	Liver
CEP78	ME1	Liver
CEP83	ME1	Liver
CEP85L	ME1	Liver
CEP89	ME1	Liver
CEP95	ME1	Liver
CEP97	ME1	Liver
CERK	ME1	Liver
CERS1	ME1	Liver
CERS6	ME1	Liver
CERT1	ME1	Liver
CETN3	ME1	Liver
CFAP161	ME1	Liver
CFAP206	ME1	Liver
CFAP53	ME1	Liver
CFAP57	ME1	Liver
CFAP97	ME1	Liver
CFLAR	ME1	Liver
CGAS	ME1	Liver
CGGBP1	ME1	Liver
CGRRF1	ME1	Liver
CH25H	ME1	Liver
CHD1	ME1	Liver
CHD1L	ME1	Liver
CHD2	ME1	Liver
CHD4	ME1	Liver
CHD5	ME1	Liver
CHD7	ME1	Liver
CHFR	ME1	Liver
CHIC2	ME1	Liver
CHL1	ME1	Liver
CHM	ME1	Liver
CHMP1A	ME1	Liver
CHMP1B	ME1	Liver
CHMP2B	ME1	Liver
CHMP4B	ME1	Liver
CHMP5	ME1	Liver
CHMP6	ME1	Liver
CHN2	ME1	Liver
CHP1	ME1	Liver
CHPT1	ME1	Liver
CHRAC1	ME1	Liver
CHRDL1	ME1	Liver
CHRNB4	ME1	Liver
CHST11	ME1	Liver
CHST12	ME1	Liver
CHST14	ME1	Liver
CHST15	ME1	Liver
CHST2	ME1	Liver
CHST3	ME1	Liver
CHST8	ME1	Liver
CHST9	ME1	Liver
CHSY1	ME1	Liver
CHSY3	ME1	Liver
CHUK	ME1	Liver
CIB2	ME1	Liver
CIB3	ME1	Liver
CIBAR1	ME1	Liver
CIITA	ME1	Liver
CILK1	ME1	Liver
CIP2A	ME1	Liver
CIPC	ME1	Liver
CIR1	ME1	Liver
CITED2	ME1	Liver
CIZ1	ME1	Liver
CKAP2	ME1	Liver
CKAP4	ME1	Liver
CKAP5	ME1	Liver
CKB	ME1	Liver
CLASP1	ME1	Liver
CLASP2	ME1	Liver
CLCN7	ME1	Liver
CLDN5	ME1	Liver
CLEC3B	ME1	Liver
CLGN	ME1	Liver
CLIC2	ME1	Liver
CLIC5	ME1	Liver
CLIC6	ME1	Liver
CLIP1	ME1	Liver
CLIP2	ME1	Liver
CLK1	ME1	Liver
CLK2	ME1	Liver
CLK3	ME1	Liver
CLK4	ME1	Liver
CLN6	ME1	Liver
CLOCK	ME1	Liver
CLSPN	ME1	Liver
CLSTN1	ME1	Liver
CLTC	ME1	Liver
CLTCL1	ME1	Liver
CLTRN	ME1	Liver
CMKLR1	ME1	Liver
CMPK1	ME1	Liver
CMTM3	ME1	Liver
CMTM4	ME1	Liver
CMTM6	ME1	Liver
CMTM7	ME1	Liver
CMTR1	ME1	Liver
CMTR2	ME1	Liver
CMYA5	ME1	Liver
CNDP2	ME1	Liver
CNEP1R1	ME1	Liver
CNGB1	ME1	Liver
CNKSR3	ME1	Liver
CNN2	ME1	Liver
CNN3	ME1	Liver
CNOT10	ME1	Liver
CNOT11	ME1	Liver
CNOT2	ME1	Liver
CNOT4	ME1	Liver
CNOT6	ME1	Liver
CNOT8	ME1	Liver
CNST	ME1	Liver
CNTN1	ME1	Liver
CNTNAP1	ME1	Liver
CNTNAP2	ME1	Liver
CNTRL	ME1	Liver
COG2	ME1	Liver
COG5	ME1	Liver
COG6	ME1	Liver
COL12A1	ME1	Liver
COL14A1	ME1	Liver
COL15A1	ME1	Liver
COL16A1	ME1	Liver
COL17A1	ME1	Liver
COL18A1	ME1	Liver
COL19A1	ME1	Liver
COL1A1	ME1	Liver
COL1A2	ME1	Liver
COL23A1	ME1	Liver
COL27A1	ME1	Liver
COL3A1	ME1	Liver
COL4A1	ME1	Liver
COL4A2	ME1	Liver
COL4A5	ME1	Liver
COL5A1	ME1	Liver
COL5A2	ME1	Liver
COL6A1	ME1	Liver
COL6A2	ME1	Liver
COL6A3	ME1	Liver
COL6A6	ME1	Liver
COL8A1	ME1	Liver
COL8A2	ME1	Liver
COL9A2	ME1	Liver
COLCA2	ME1	Liver
COLEC12	ME1	Liver
COMMD10	ME1	Liver
COMMD1	ME1	Liver
COMMD8	ME1	Liver
COMMD9	ME1	Liver
COPB2	ME1	Liver
COPG2	ME1	Liver
COPS3	ME1	Liver
COPS4	ME1	Liver
COPS7B	ME1	Liver
COPS8	ME1	Liver
CORO1B	ME1	Liver
CORO1C	ME1	Liver
CORO2A	ME1	Liver
COTL1	ME1	Liver
CPAMD8	ME1	Liver
CPE	ME1	Liver
CPEB4	ME1	Liver
CPED1	ME1	Liver
CPLANE1	ME1	Liver
CPNE1	ME1	Liver
CPSF2	ME1	Liver
CPSF3	ME1	Liver
CPSF6	ME1	Liver
CPSF7	ME1	Liver
CPXM2	ME1	Liver
CPZ	ME1	Liver
CRACR2B	ME1	Liver
CRAMP1	ME1	Liver
CRB2	ME1	Liver
CREB1	ME1	Liver
CREB3L1	ME1	Liver
CREB5	ME1	Liver
CREG1	ME1	Liver
CREG2	ME1	Liver
CRIM1	ME1	Liver
CRIP1	ME1	Liver
CRISPLD1	ME1	Liver
CRISPLD2	ME1	Liver
CRK	ME1	Liver
CRKL	ME1	Liver
CRLF1	ME1	Liver
CRLF3	ME1	Liver
CRMP1	ME1	Liver
CRNKL1	ME1	Liver
CROCC	ME1	Liver
CRTC1	ME1	Liver
CRYAB	ME1	Liver
CRYBB1	ME1	Liver
CRYBG1	ME1	Liver
CSDE1	ME1	Liver
CSE1L	ME1	Liver
CSF1	ME1	Liver
CSF1R	ME1	Liver
CSF3R	ME1	Liver
CSGALNACT1	ME1	Liver
CSGALNACT2	ME1	Liver
CSK	ME1	Liver
CSNK1A1	ME1	Liver
CSNK1E	ME1	Liver
CSNK1G1	ME1	Liver
CSNK2A2	ME1	Liver
CSPG4	ME1	Liver
CSPG5	ME1	Liver
CSPP1	ME1	Liver
CSRP1	ME1	Liver
CST7	ME1	Liver
CSTF1	ME1	Liver
CTBP1	ME1	Liver
CTC1	ME1	Liver
CTCF	ME1	Liver
CTDSPL2	ME1	Liver
CTHRC1	ME1	Liver
CTLA4	ME1	Liver
CTNNA1	ME1	Liver
CTNNA2	ME1	Liver
CTNNAL1	ME1	Liver
CTNNB1	ME1	Liver
CTNNBIP1	ME1	Liver
CTNNBL1	ME1	Liver
CTNND1	ME1	Liver
CTNND2	ME1	Liver
CTNS	ME1	Liver
CTSA	ME1	Liver
CTSB	ME1	Liver
CTSC	ME1	Liver
CTSH	ME1	Liver
CTSK	ME1	Liver
CTSS	ME1	Liver
CTSZ	ME1	Liver
CTTN	ME1	Liver
CTTNBP2	ME1	Liver
CTTNBP2NL	ME1	Liver
CUL1	ME1	Liver
CUL3	ME1	Liver
CUL4B	ME1	Liver
CUL9	ME1	Liver
CUX1	ME1	Liver
CWC22	ME1	Liver
CWC27	ME1	Liver
CX3CL1	ME1	Liver
CX3CR1	ME1	Liver
CXCL12	ME1	Liver
CXCL14	ME1	Liver
CXCR4	ME1	Liver
CXCR5	ME1	Liver
CXCR6	ME1	Liver
CXXC4	ME1	Liver
CYFIP1	ME1	Liver
CYFIP2	ME1	Liver
CYGB	ME1	Liver
CYLD	ME1	Liver
CYRIA	ME1	Liver
CYRIB	ME1	Liver
CYSLTR1	ME1	Liver
CYSLTR2	ME1	Liver
CYTH1	ME1	Liver
CYTH3	ME1	Liver
CYTH4	ME1	Liver
CYTL1	ME1	Liver
CYYR1	ME1	Liver
CZH18orf25	ME1	Liver
CZH5orf34	ME1	Liver
CZH9orf64	ME1	Liver
DAAM2	ME1	Liver
DAB2	ME1	Liver
DACH1	ME1	Liver
DACH2	ME1	Liver
DACT1	ME1	Liver
DACT2	ME1	Liver
DAGLA	ME1	Liver
DAGLB	ME1	Liver
DAPK1	ME1	Liver
DAPK3	ME1	Liver
DAPP1	ME1	Liver
DARS1	ME1	Liver
DAW1	ME1	Liver
DAZAP1	ME1	Liver
DBF4	ME1	Liver
DBN1	ME1	Liver
DBNDD2	ME1	Liver
DBR1	ME1	Liver
DCAF10	ME1	Liver
DCAF17	ME1	Liver
DCAF7	ME1	Liver
DCBLD1	ME1	Liver
DCBLD2	ME1	Liver
DCDC2	ME1	Liver
DCHS1	ME1	Liver
DCK	ME1	Liver
DCLK1	ME1	Liver
DCLK2	ME1	Liver
DCLK3	ME1	Liver
DCLRE1A	ME1	Liver
DCLRE1B	ME1	Liver
DCLRE1C	ME1	Liver
DCN	ME1	Liver
DCP1A	ME1	Liver
DCP1B	ME1	Liver
DCP2	ME1	Liver
DCPS	ME1	Liver
DCTD	ME1	Liver
DCUN1D1	ME1	Liver
DCUN1D2	ME1	Liver
DCUN1D3	ME1	Liver
DCUN1D5	ME1	Liver
DCX	ME1	Liver
DDAH1	ME1	Liver
DDB2	ME1	Liver
DDIAS	ME1	Liver
DDR2	ME1	Liver
DDX1	ME1	Liver
DDX31	ME1	Liver
DDX3X	ME1	Liver
DDX42	ME1	Liver
DDX58	ME1	Liver
DEAF1	ME1	Liver
DEF6	ME1	Liver
DEGS1	ME1	Liver
DEGS2	ME1	Liver
DEK	ME1	Liver
DENND10	ME1	Liver
DENND1A	ME1	Liver
DENND1B	ME1	Liver
DENND2A	ME1	Liver
DENND2C	ME1	Liver
DENND2D	ME1	Liver
DENND3	ME1	Liver
DENND4C	ME1	Liver
DENND5A	ME1	Liver
DENND6A	ME1	Liver
DEPDC1	ME1	Liver
DEPDC1B	ME1	Liver
DERL3	ME1	Liver
DES	ME1	Liver
DFFA	ME1	Liver
DGCR2	ME1	Liver
DGCR8	ME1	Liver
DGKB	ME1	Liver
DGKD	ME1	Liver
DGKE	ME1	Liver
DGKH	ME1	Liver
DGKK	ME1	Liver
DHRS11	ME1	Liver
DHRS7C	ME1	Liver
DHX15	ME1	Liver
DHX30	ME1	Liver
DHX33	ME1	Liver
DHX35	ME1	Liver
DHX36	ME1	Liver
DHX57	ME1	Liver
DHX8	ME1	Liver
DIAPH3	ME1	Liver
DICER1	ME1	Liver
DIO1	ME1	Liver
DIP2C	ME1	Liver
DIPK2A	ME1	Liver
DIRAS3	ME1	Liver
DIS3	ME1	Liver
DIS3L	ME1	Liver
DISC1	ME1	Liver
DISP3	ME1	Liver
DIXDC1	ME1	Liver
DKK3	ME1	Liver
DLG1	ME1	Liver
DLG2	ME1	Liver
DLG5	ME1	Liver
DLGAP4	ME1	Liver
DLGAP5	ME1	Liver
DLK2	ME1	Liver
DLL1	ME1	Liver
DMD	ME1	Liver
DMTF1	ME1	Liver
DMTN	ME1	Liver
DMXL1	ME1	Liver
DNA2	ME1	Liver
DNAH7	ME1	Liver
DNAH9	ME1	Liver
DNAJA2	ME1	Liver
DNAJB14	ME1	Liver
DNAJB4	ME1	Liver
DNAJB6	ME1	Liver
DNAJB9	ME1	Liver
DNAJC10	ME1	Liver
DNAJC5	ME1	Liver
DNAJC6	ME1	Liver
DNAL1	ME1	Liver
DNASE2B	ME1	Liver
DNER	ME1	Liver
DNM1	ME1	Liver
DNM1L	ME1	Liver
DNM3	ME1	Liver
DNMT3A	ME1	Liver
DNTT	ME1	Liver
DNTTIP2	ME1	Liver
DOCK10	ME1	Liver
DOCK11	ME1	Liver
DOCK2	ME1	Liver
DOCK3	ME1	Liver
DOCK4	ME1	Liver
DOCK7	ME1	Liver
DOCK8	ME1	Liver
DOK1	ME1	Liver
DOK2	ME1	Liver
DOK4	ME1	Liver
DOK6	ME1	Liver
DOK7	ME1	Liver
DONSON	ME1	Liver
DOP1A	ME1	Liver
DOP1B	ME1	Liver
DPH7	ME1	Liver
DPT	ME1	Liver
DPY19L1	ME1	Liver
DPY19L3	ME1	Liver
DPY19L4	ME1	Liver
DPYSL2	ME1	Liver
DPYSL3	ME1	Liver
DR1	ME1	Liver
DRAM1	ME1	Liver
DROSHA	ME1	Liver
DSCC1	ME1	Liver
DSE	ME1	Liver
DSEL	ME1	Liver
DSG2	ME1	Liver
DST	ME1	Liver
DSTN	ME1	Liver
DSTYK	ME1	Liver
DTNB	ME1	Liver
DTWD1	ME1	Liver
DTX3L	ME1	Liver
DUS4L	ME1	Liver
DUSP10	ME1	Liver
DUSP26	ME1	Liver
DUSP5	ME1	Liver
DUSP6	ME1	Liver
DUSP8	ME1	Liver
DUT	ME1	Liver
DYM	ME1	Liver
DYNC1I2	ME1	Liver
DYNC1LI1	ME1	Liver
DYNC1LI2	ME1	Liver
DYNC2H1	ME1	Liver
DYNC2I1	ME1	Liver
DYNC2LI1	ME1	Liver
DYNLT1	ME1	Liver
DYNLT5	ME1	Liver
DYRK1A	ME1	Liver
DYRK2	ME1	Liver
DYRK3	ME1	Liver
DYSF	ME1	Liver
DZIP1	ME1	Liver
E2F1	ME1	Liver
E2F3	ME1	Liver
E2F4	ME1	Liver
E2F5	ME1	Liver
E2F6	ME1	Liver
E2F7	ME1	Liver
E2F8	ME1	Liver
E4F1	ME1	Liver
EAF2	ME1	Liver
EBF1	ME1	Liver
ECD	ME1	Liver
ECM1	ME1	Liver
ECM2	ME1	Liver
ECPAS	ME1	Liver
ECSCR	ME1	Liver
ECT2	ME1	Liver
EDC4	ME1	Liver
EDEM3	ME1	Liver
EDN1	ME1	Liver
EDN2	ME1	Liver
EDNRA	ME1	Liver
EDRF1	ME1	Liver
EEA1	ME1	Liver
EED	ME1	Liver
EEF1AKMT1	ME1	Liver
EEF1E1	ME1	Liver
EFCAB14	ME1	Liver
EFEMP1	ME1	Liver
EFHD1	ME1	Liver
EFHD2	ME1	Liver
EFNA2	ME1	Liver
EFNA5	ME1	Liver
EFNB1	ME1	Liver
EFNB2	ME1	Liver
EFR3B	ME1	Liver
EFTUD2	ME1	Liver
EGFL6	ME1	Liver
EGFL7	ME1	Liver
EGFLAM	ME1	Liver
EGLN1	ME1	Liver
EGR2	ME1	Liver
EGR3	ME1	Liver
EHD4	ME1	Liver
EHF	ME1	Liver
EHMT1	ME1	Liver
EIF1AX	ME1	Liver
EIF1B	ME1	Liver
EIF2AK2	ME1	Liver
EIF2AK3	ME1	Liver
EIF2AK4	ME1	Liver
EIF2B2	ME1	Liver
EIF2B3	ME1	Liver
EIF3A	ME1	Liver
EIF4A2	ME1	Liver
EIF4ENIF1	ME1	Liver
EIF4G2	ME1	Liver
EIF4G3	ME1	Liver
EIF4H	ME1	Liver
EIF6	ME1	Liver
EIPR1	ME1	Liver
ELF1	ME1	Liver
ELF2	ME1	Liver
ELFN1	ME1	Liver
ELK3	ME1	Liver
ELK4	ME1	Liver
ELMO1	ME1	Liver
ELMO2	ME1	Liver
ELN	ME1	Liver
ELOVL4	ME1	Liver
ELOVL7	ME1	Liver
ELP1	ME1	Liver
ELP2	ME1	Liver
EMB	ME1	Liver
EMC1	ME1	Liver
EMCN	ME1	Liver
EME1	ME1	Liver
EMILIN2	ME1	Liver
EML1	ME1	Liver
EML4	ME1	Liver
EMP1	ME1	Liver
EMSY	ME1	Liver
ENAH	ME1	Liver
ENC1	ME1	Liver
ENDOD1	ME1	Liver
ENO2	ME1	Liver
ENTPD1	ME1	Liver
ENTPD2	ME1	Liver
ENTPD3	ME1	Liver
ENTPD4	ME1	Liver
ENTPD6	ME1	Liver
EOGT	ME1	Liver
EOMES	ME1	Liver
EP300	ME1	Liver
EP400	ME1	Liver
EPB41L1	ME1	Liver
EPB41L2	ME1	Liver
EPB41L3	ME1	Liver
EPB41L5	ME1	Liver
EPC1	ME1	Liver
EPC2	ME1	Liver
EPCAM	ME1	Liver
EPDR1	ME1	Liver
EPHA2	ME1	Liver
EPHA3	ME1	Liver
EPHA4	ME1	Liver
EPHA7	ME1	Liver
EPHB1	ME1	Liver
EPN2	ME1	Liver
EPS15	ME1	Liver
EPS15L1	ME1	Liver
EPS8	ME1	Liver
ERAP1	ME1	Liver
ERBIN	ME1	Liver
ERC1	ME1	Liver
ERCC3	ME1	Liver
ERCC4	ME1	Liver
ERCC6	ME1	Liver
ERCC6L	ME1	Liver
ERCC8	ME1	Liver
ERGIC2	ME1	Liver
ERI2	ME1	Liver
ERICH1	ME1	Liver
ERLIN1	ME1	Liver
ERMARD	ME1	Liver
ERN2	ME1	Liver
ERO1A	ME1	Liver
ERVS71-1	ME1	Liver
ESCO1	ME1	Liver
ESF1	ME1	Liver
ESS2	ME1	Liver
ESYT2	ME1	Liver
ETAA1	ME1	Liver
ETF1	ME1	Liver
ETS1	ME1	Liver
ETS2	ME1	Liver
ETV1	ME1	Liver
ETV4	ME1	Liver
ETV6	ME1	Liver
ETV7	ME1	Liver
EVA1A	ME1	Liver
EVA1C	ME1	Liver
EVI2A	ME1	Liver
EVI2B	ME1	Liver
EVL	ME1	Liver
EXD2	ME1	Liver
EXO1	ME1	Liver
EXOC1	ME1	Liver
EXOC2	ME1	Liver
EXOC3	ME1	Liver
EXOC3L1	ME1	Liver
EXOC5	ME1	Liver
EXOC6	ME1	Liver
EXOC6B	ME1	Liver
EXOC7	ME1	Liver
EXOC8	ME1	Liver
EXT2	ME1	Liver
EXTL2	ME1	Liver
EXTL3	ME1	Liver
EYA2	ME1	Liver
EYA3	ME1	Liver
EZH1	ME1	Liver
EZH2	ME1	Liver
F13A1	ME1	Liver
F2R	ME1	Liver
F2RL2	ME1	Liver
F3	ME1	Liver
F8	ME1	Liver
FAAP20	ME1	Liver
FAM102A	ME1	Liver
FAM102B	ME1	Liver
FAM104A	ME1	Liver
FAM107B	ME1	Liver
FAM117A	ME1	Liver
FAM118B	ME1	Liver
FAM120A	ME1	Liver
FAM124B	ME1	Liver
FAM126A	ME1	Liver
FAM133B	ME1	Liver
FAM135A	ME1	Liver
FAM13B	ME1	Liver
FAM149A	ME1	Liver
FAM151B	ME1	Liver
FAM160B1	ME1	Liver
FAM161A	ME1	Liver
FAM167B	ME1	Liver
FAM168B	ME1	Liver
FAM169A	ME1	Liver
FAM171A1	ME1	Liver
FAM171A2	ME1	Liver
FAM171B	ME1	Liver
FAM174B	ME1	Liver
FAM177A1	ME1	Liver
FAM180A	ME1	Liver
FAM180B	ME1	Liver
FAM185A	ME1	Liver
FAM189B	ME1	Liver
FAM193A	ME1	Liver
FAM193B	ME1	Liver
FAM199X	ME1	Liver
FAM217B	ME1	Liver
FAM219A	ME1	Liver
FAM222B	ME1	Liver
FAM3C	ME1	Liver
FAM43A	ME1	Liver
FAM53A	ME1	Liver
FAM53B	ME1	Liver
FAM76B	ME1	Liver
FAM78A	ME1	Liver
FAM83B	ME1	Liver
FAM91A1	ME1	Liver
FAM98B	ME1	Liver
FAN1	ME1	Liver
FANCA	ME1	Liver
FANCB	ME1	Liver
FANCC	ME1	Liver
FANCD2	ME1	Liver
FANCI	ME1	Liver
FANCL	ME1	Liver
FANCM	ME1	Liver
FAR2	ME1	Liver
FARP1	ME1	Liver
FAS	ME1	Liver
FASTKD2	ME1	Liver
FAT1	ME1	Liver
FBLN5	ME1	Liver
FBN1	ME1	Liver
FBN2	ME1	Liver
FBXL18	ME1	Liver
FBXL3	ME1	Liver
FBXL7	ME1	Liver
FBXO11	ME1	Liver
FBXO28	ME1	Liver
FBXO30	ME1	Liver
FBXO33	ME1	Liver
FBXO34	ME1	Liver
FBXO5	ME1	Liver
FBXW11	ME1	Liver
FBXW2	ME1	Liver
FBXW7	ME1	Liver
FCHO2	ME1	Liver
FCHSD1	ME1	Liver
FCHSD2	ME1	Liver
FDXACB1	ME1	Liver
FEM1B	ME1	Liver
FER1L6	ME1	Liver
FES	ME1	Liver
FEZ1	ME1	Liver
FEZ2	ME1	Liver
FGD2	ME1	Liver
FGD5	ME1	Liver
FGD6	ME1	Liver
FGF10	ME1	Liver
FGF12	ME1	Liver
FGF7	ME1	Liver
FGF9	ME1	Liver
FGFR1	ME1	Liver
FGFR2	ME1	Liver
FGL1	ME1	Liver
FGL2	ME1	Liver
FGR	ME1	Liver
FHL1	ME1	Liver
FHL2	ME1	Liver
FHL3	ME1	Liver
FHL5	ME1	Liver
FHOD1	ME1	Liver
FHOD3	ME1	Liver
FIBIN	ME1	Liver
FIG4	ME1	Liver
FILIP1	ME1	Liver
FILIP1L	ME1	Liver
FIP1L1	ME1	Liver
FJX1	ME1	Liver
FKBP14	ME1	Liver
FKBP15	ME1	Liver
FKBP7	ME1	Liver
FKBP9	ME1	Liver
FLI1	ME1	Liver
FLNB	ME1	Liver
FLOT2	ME1	Liver
FLRT2	ME1	Liver
FLT3	ME1	Liver
FLT4	ME1	Liver
FMN1	ME1	Liver
FMNL1	ME1	Liver
FMNL2	ME1	Liver
FNBP1	ME1	Liver
FNBP1L	ME1	Liver
FNBP4	ME1	Liver
FNDC11	ME1	Liver
FNDC3A	ME1	Liver
FNDC5	ME1	Liver
FNIP1	ME1	Liver
FNTA	ME1	Liver
FOCAD	ME1	Liver
FOSL2	ME1	Liver
FOXF1	ME1	Liver
FOXI1	ME1	Liver
FOXJ1	ME1	Liver
FOXJ2	ME1	Liver
FOXK1	ME1	Liver
FOXL3	ME1	Liver
FOXM1	ME1	Liver
FOXN2	ME1	Liver
FOXO1	ME1	Liver
FOXO4	ME1	Liver
FOXO6	ME1	Liver
FOXS1	ME1	Liver
FRAS1	ME1	Liver
FREM1	ME1	Liver
FREM2	ME1	Liver
FRG1	ME1	Liver
FRMD4A	ME1	Liver
FRMD5	ME1	Liver
FRMD6	ME1	Liver
FRMPD1	ME1	Liver
FRS2	ME1	Liver
FRS3	ME1	Liver
FRY	ME1	Liver
FRYL	ME1	Liver
FRZB	ME1	Liver
FSCN1	ME1	Liver
FSTL1	ME1	Liver
FUCA1	ME1	Liver
FUCA2	ME1	Liver
FUNDC1	ME1	Liver
FUNDC2	ME1	Liver
FUT10	ME1	Liver
FUT11	ME1	Liver
FUT7	ME1	Liver
FUT8	ME1	Liver
FXN	ME1	Liver
FXR1	ME1	Liver
FXYD6	ME1	Liver
FYB1	ME1	Liver
FYCO1	ME1	Liver
FYN	ME1	Liver
FYTTD1	ME1	Liver
FZD1	ME1	Liver
FZD2	ME1	Liver
FZD4	ME1	Liver
FZD6	ME1	Liver
G2E3	ME1	Liver
G3BP2	ME1	Liver
GAA	ME1	Liver
GAB1	ME1	Liver
GAB2	ME1	Liver
GAB3	ME1	Liver
GABARAPL1	ME1	Liver
GABPA	ME1	Liver
GABPB1	ME1	Liver
GABPB2	ME1	Liver
GABRA1	ME1	Liver
GABRB2	ME1	Liver
GAL3ST1	ME1	Liver
GALC	ME1	Liver
GALK2	ME1	Liver
GALNS	ME1	Liver
GALNT10	ME1	Liver
GALNT2	ME1	Liver
GALNT3	ME1	Liver
GALNT5	ME1	Liver
GALNT7	ME1	Liver
GAN	ME1	Liver
GANC	ME1	Liver
GAPVD1	ME1	Liver
GARNL3	ME1	Liver
GARRE1	ME1	Liver
GAS1	ME1	Liver
GAS2	ME1	Liver
GAS2L3	ME1	Liver
GAS7	ME1	Liver
GASK1B	ME1	Liver
GATA2	ME1	Liver
GATA3	ME1	Liver
GATAD2B	ME1	Liver
GATD1	ME1	Liver
GBGT1	ME1	Liver
GCC2	ME1	Liver
GCFC2	ME1	Liver
GCG	ME1	Liver
GCN1	ME1	Liver
GCNA	ME1	Liver
GCNT1	ME1	Liver
GCNT4	ME1	Liver
GDAP2	ME1	Liver
GDPD1	ME1	Liver
GEMIN2	ME1	Liver
GEMIN5	ME1	Liver
GEN1	ME1	Liver
GFI1	ME1	Liver
GFOD1	ME1	Liver
GFOD2	ME1	Liver
GFPT1	ME1	Liver
GGA2	ME1	Liver
GGA3	ME1	Liver
GGNBP2	ME1	Liver
GGPS1	ME1	Liver
GGT1	ME1	Liver
GID4	ME1	Liver
GID8	ME1	Liver
GIGYF2	ME1	Liver
GINM1	ME1	Liver
GINS1	ME1	Liver
GINS3	ME1	Liver
GIPC2	ME1	Liver
GIT2	ME1	Liver
GJA1	ME1	Liver
GJA3	ME1	Liver
GJA5	ME1	Liver
GJB7	ME1	Liver
GJC1	ME1	Liver
GJC2	ME1	Liver
GLCCI1	ME1	Liver
GLE1	ME1	Liver
GLG1	ME1	Liver
GLI2	ME1	Liver
GLI3	ME1	Liver
GLIPR2	ME1	Liver
GLIS1	ME1	Liver
GLIS3	ME1	Liver
GLMN	ME1	Liver
GLS	ME1	Liver
GLT8D2	ME1	Liver
GLYR1	ME1	Liver
GMCL1	ME1	Liver
GMDS	ME1	Liver
GMEB1	ME1	Liver
GMFB	ME1	Liver
GMNN	ME1	Liver
GNA12	ME1	Liver
GNA13	ME1	Liver
GNAI2	ME1	Liver
GNAI3	ME1	Liver
GNAL	ME1	Liver
GNAS	ME1	Liver
GNB1	ME1	Liver
GNB4	ME1	Liver
GNB5	ME1	Liver
GNE	ME1	Liver
GNG10	ME1	Liver
GNG12	ME1	Liver
GNG2	ME1	Liver
GNG7	ME1	Liver
GNGT2	ME1	Liver
GNPDA1	ME1	Liver
GNPDA2	ME1	Liver
GNS	ME1	Liver
GOLGA1	ME1	Liver
GOLGB1	ME1	Liver
GOLM2	ME1	Liver
GOLPH3	ME1	Liver
GOLT1B	ME1	Liver
GOPC	ME1	Liver
GORAB	ME1	Liver
GOSR1	ME1	Liver
GOSR2	ME1	Liver
GP1BB	ME1	Liver
GPA33	ME1	Liver
GPATCH1	ME1	Liver
GPATCH2	ME1	Liver
GPATCH2L	ME1	Liver
GPATCH8	ME1	Liver
GPBP1	ME1	Liver
GPBP1L1	ME1	Liver
GPC1	ME1	Liver
GPC3	ME1	Liver
GPC4	ME1	Liver
GPC5	ME1	Liver
GPD1L	ME1	Liver
GPD2	ME1	Liver
GPER1	ME1	Liver
GPM6B	ME1	Liver
GPN1	ME1	Liver
GPR137B	ME1	Liver
GPR160	ME1	Liver
GPR161	ME1	Liver
GPR162	ME1	Liver
GPR171	ME1	Liver
GPR174	ME1	Liver
GPR20	ME1	Liver
GPR21	ME1	Liver
GPR27	ME1	Liver
GPR34	ME1	Liver
GPR35	ME1	Liver
GPR50	ME1	Liver
GPR52	ME1	Liver
GPR55	ME1	Liver
GPR63	ME1	Liver
GPR65	ME1	Liver
GPR68	ME1	Liver
GPR75	ME1	Liver
GPR82	ME1	Liver
GPR85	ME1	Liver
GPRIN3	ME1	Liver
GPS1	ME1	Liver
GPSM2	ME1	Liver
GPX2	ME1	Liver
GPX7	ME1	Liver
GPX8	ME1	Liver
GRAMD2B	ME1	Liver
GRAMD4	ME1	Liver
GRAP2	ME1	Liver
GREM1	ME1	Liver
GRHL2	ME1	Liver
GRIP1	ME1	Liver
GRK2	ME1	Liver
GRK3	ME1	Liver
GRK4	ME1	Liver
GRK6	ME1	Liver
GRK7	ME1	Liver
GRPEL2	ME1	Liver
GSDMA	ME1	Liver
GSDME	ME1	Liver
GSG1	ME1	Liver
GSK3B	ME1	Liver
GSN	ME1	Liver
GSPT1	ME1	Liver
GTF2A1	ME1	Liver
GTF2E2	ME1	Liver
GTF2H1	ME1	Liver
GTF2H3	ME1	Liver
GTF2I	ME1	Liver
GTF3C1	ME1	Liver
GTF3C4	ME1	Liver
GTPBP1	ME1	Liver
GTSE1	ME1	Liver
GTSF1	ME1	Liver
GUCA1C	ME1	Liver
GUCY1A1	ME1	Liver
GUCY1A2	ME1	Liver
GUCY1B1	ME1	Liver
GULP1	ME1	Liver
GXYLT1	ME1	Liver
GYG1	ME1	Liver
GZF1	ME1	Liver
HABP4	ME1	Liver
HACD4	ME1	Liver
HACE1	ME1	Liver
HAND2	ME1	Liver
HAP1	ME1	Liver
HAPLN1	ME1	Liver
HAS2	ME1	Liver
HASPIN	ME1	Liver
HAT1	ME1	Liver
HAUS2	ME1	Liver
HAUS3	ME1	Liver
HAUS8	ME1	Liver
HBEGF	ME1	Liver
HBS1L	ME1	Liver
HCFC2	ME1	Liver
HDAC10	ME1	Liver
HDAC1	ME1	Liver
HDAC2	ME1	Liver
HDAC4	ME1	Liver
HDAC9	ME1	Liver
HDC	ME1	Liver
HDGFL3	ME1	Liver
HDX	ME1	Liver
HEATR1	ME1	Liver
HEATR3	ME1	Liver
HEATR5A	ME1	Liver
HEATR5B	ME1	Liver
HEBP2	ME1	Liver
HECA	ME1	Liver
HECTD2	ME1	Liver
HECW1	ME1	Liver
HECW2	ME1	Liver
HEG1	ME1	Liver
HELB	ME1	Liver
HELLS	ME1	Liver
HELQ	ME1	Liver
HELZ	ME1	Liver
HEPH	ME1	Liver
HERC3	ME1	Liver
HERPUD2	ME1	Liver
HES6	ME1	Liver
HEXA	ME1	Liver
HEXB	ME1	Liver
HEY1	ME1	Liver
HEYL	ME1	Liver
HGF	ME1	Liver
HHIPL1	ME1	Liver
HIC1	ME1	Liver
HID1	ME1	Liver
HIF1A	ME1	Liver
HIF1AN	ME1	Liver
HIP1	ME1	Liver
HIPK1	ME1	Liver
HIVEP2	ME1	Liver
HIVEP3	ME1	Liver
HK2	ME1	Liver
HLX	ME1	Liver
HMBOX1	ME1	Liver
HMCN1	ME1	Liver
HMG20A	ME1	Liver
HMG20B	ME1	Liver
HMGA1	ME1	Liver
HMGB1	ME1	Liver
HMGB2	ME1	Liver
HMGN2	ME1	Liver
HMGN3	ME1	Liver
HMGN5	ME1	Liver
HMGXB3	ME1	Liver
HMGXB4	ME1	Liver
HMMR	ME1	Liver
HNRNPA0	ME1	Liver
HNRNPA2B1	ME1	Liver
HNRNPA3	ME1	Liver
HNRNPAB	ME1	Liver
HNRNPD	ME1	Liver
HNRNPH1	ME1	Liver
HNRNPH3	ME1	Liver
HNRNPK	ME1	Liver
HNRNPL	ME1	Liver
HNRNPLL	ME1	Liver
HNRNPM	ME1	Liver
HNRNPR	ME1	Liver
HNRNPU	ME1	Liver
HOMER1	ME1	Liver
HOMER3	ME1	Liver
HOOK3	ME1	Liver
HORMAD1	ME1	Liver
HOXA3	ME1	Liver
HOXA4	ME1	Liver
HOXA5	ME1	Liver
HOXA7	ME1	Liver
HOXB2	ME1	Liver
HOXB3	ME1	Liver
HOXB4	ME1	Liver
HOXB5	ME1	Liver
HP1BP3	ME1	Liver
HPCA	ME1	Liver
HPCAL1	ME1	Liver
HPRT1	ME1	Liver
HPS3	ME1	Liver
HPS5	ME1	Liver
HRH1	ME1	Liver
HRH3	ME1	Liver
HS3ST1	ME1	Liver
HSBP1	ME1	Liver
HSD17B4	ME1	Liver
HSF2	ME1	Liver
HSPA12A	ME1	Liver
HSPA13	ME1	Liver
HSPA14	ME1	Liver
HSPB1	ME1	Liver
HSPG2	ME1	Liver
HTATSF1	ME1	Liver
HTR1B	ME1	Liver
HTR2A	ME1	Liver
HTR2B	ME1	Liver
HTR7	ME1	Liver
HTRA3	ME1	Liver
HUNK	ME1	Liver
IARS2	ME1	Liver
IBTK	ME1	Liver
ICA1	ME1	Liver
ICE1	ME1	Liver
ICE2	ME1	Liver
ICOSLG	ME1	Liver
ID2	ME1	Liver
ID4	ME1	Liver
IDE	ME1	Liver
IDH3A	ME1	Liver
IER5L	ME1	Liver
IFFO1	ME1	Liver
IFIH1	ME1	Liver
IFNAR1	ME1	Liver
IFNAR2	ME1	Liver
IFNGR1	ME1	Liver
IFT122	ME1	Liver
IFT140	ME1	Liver
IFT46	ME1	Liver
IFT80	ME1	Liver
IFT81	ME1	Liver
IGF1R	ME1	Liver
IGF2BP3	ME1	Liver
IGFBP3	ME1	Liver
IGFBP7	ME1	Liver
IGSF3	ME1	Liver
IGSF6	ME1	Liver
IGSF9	ME1	Liver
IKBKE	ME1	Liver
IKZF1	ME1	Liver
IKZF2	ME1	Liver
IKZF3	ME1	Liver
IKZF5	ME1	Liver
IL10RA	ME1	Liver
IL12RB1	ME1	Liver
IL13RA1	ME1	Liver
IL15RA	ME1	Liver
IL16	ME1	Liver
IL17RA	ME1	Liver
IL17RD	ME1	Liver
IL17RE	ME1	Liver
IL18	ME1	Liver
IL18R1	ME1	Liver
IL1RL1	ME1	Liver
IL23R	ME1	Liver
IL2RB	ME1	Liver
IL2RG	ME1	Liver
IL4I1	ME1	Liver
IL7R	ME1	Liver
ILK	ME1	Liver
ING3	ME1	Liver
ING4	ME1	Liver
ING5	ME1	Liver
INHBB	ME1	Liver
INO80	ME1	Liver
INO80C	ME1	Liver
INO80D	ME1	Liver
INPP4A	ME1	Liver
INPP5A	ME1	Liver
INPP5D	ME1	Liver
INSR	ME1	Liver
INTS10	ME1	Liver
INTS11	ME1	Liver
INTS14	ME1	Liver
INTS1	ME1	Liver
INTS2	ME1	Liver
INTS4	ME1	Liver
INTS7	ME1	Liver
INTS8	ME1	Liver
INTS9	ME1	Liver
INTU	ME1	Liver
INVS	ME1	Liver
IP6K1	ME1	Liver
IPCEF1	ME1	Liver
IPO9	ME1	Liver
IPPK	ME1	Liver
IQCE	ME1	Liver
IQCG	ME1	Liver
IQGAP1	ME1	Liver
IQGAP3	ME1	Liver
IRAG1	ME1	Liver
IRAG2	ME1	Liver
IRAK1BP1	ME1	Liver
IRAK2	ME1	Liver
IRAK4	ME1	Liver
IREB2	ME1	Liver
IRF1	ME1	Liver
IRF2BPL	ME1	Liver
IRF4	ME1	Liver
IRF8	ME1	Liver
ISCA1	ME1	Liver
IST1	ME1	Liver
ITCH	ME1	Liver
ITGA11	ME1	Liver
ITGA1	ME1	Liver
ITGA2	ME1	Liver
ITGA2B	ME1	Liver
ITGA3	ME1	Liver
ITGA4	ME1	Liver
ITGA8	ME1	Liver
ITGA9	ME1	Liver
ITGAE	ME1	Liver
ITGAV	ME1	Liver
ITGB1	ME1	Liver
ITGB1BP1	ME1	Liver
ITGB2	ME1	Liver
ITGB3	ME1	Liver
ITGB4	ME1	Liver
ITGB8	ME1	Liver
ITIH5	ME1	Liver
ITK	ME1	Liver
ITM2A	ME1	Liver
ITM2B	ME1	Liver
ITM2C	ME1	Liver
ITPR3	ME1	Liver
ITPRID2	ME1	Liver
ITPRIPL2	ME1	Liver
ITSN1	ME1	Liver
ITSN2	ME1	Liver
IWS1	ME1	Liver
JADE2	ME1	Liver
JADE3	ME1	Liver
JAG1	ME1	Liver
JAG2	ME1	Liver
JAK1	ME1	Liver
JAK2	ME1	Liver
JAKMIP1	ME1	Liver
JAKMIP2	ME1	Liver
JAM2	ME1	Liver
JAM3	ME1	Liver
JAML	ME1	Liver
JCHAIN	ME1	Liver
JMJD4	ME1	Liver
JOSD1	ME1	Liver
JPH1	ME1	Liver
JPT2	ME1	Liver
KANK3	ME1	Liver
KANK4	ME1	Liver
KANSL1	ME1	Liver
KANSL1L	ME1	Liver
KARS1	ME1	Liver
KAT6A	ME1	Liver
KAT6B	ME1	Liver
KAT7	ME1	Liver
KATNAL1	ME1	Liver
KATNB1	ME1	Liver
KATNBL1	ME1	Liver
KATNIP	ME1	Liver
KAZALD1	ME1	Liver
KBTBD11	ME1	Liver
KBTBD2	ME1	Liver
KBTBD4	ME1	Liver
KCNAB2	ME1	Liver
KCND2	ME1	Liver
KCNE4	ME1	Liver
KCNF1	ME1	Liver
KCNJ2	ME1	Liver
KCNJ5	ME1	Liver
KCNK5	ME1	Liver
KCNMA1	ME1	Liver
KCNMB1	ME1	Liver
KCNQ1	ME1	Liver
[truncated: 65,608 more rows]
